# Supplementary material for: Characterization of 3D organotypic epithelial tissues reveals tonsil-specific differences in tonic interferon signaling
Source: bioRxiv preprint, doi:10.1101/2023.01.19.524743, version 1 (2023-01-20)
Supplement: Supplementary File 4 [file 524743_file23.csv]

	baseMean	log2FoldChange	lfcSE	stat	pvalue	padj
ENSG00000178919	1575.68332217779	2.8131292661762	0.251029375803779	432.967630655572	9.60005191861766e-95	1.81680982559839e-90
ENSG00000159263	540.708138334687	6.93638223744155	0.471400914764787	324.237297581488	3.91530335531101e-71	3.70485579996304e-67
ENSG00000198807	1697.27569239833	4.18183594417835	0.310474132670009	305.307338042708	5.05072708043308e-67	3.18616699990654e-63
ENSG00000180818	163.120571419095	-6.60420853821328	1.25088115069138	286.162234780344	7.25538149328758e-63	3.43270236901169e-59
ENSG00000254166	195.326765694461	7.14423550318595	0.608915445652052	243.925563694833	1.07705243296821e-53	4.07664345878467e-50
ENSG00000196344	301.256032860027	4.55382328508078	0.441035872226384	218.800500690846	3.07662777306086e-48	9.70419676752945e-45
ENSG00000065320	476.700319452223	4.65630758448282	0.465559857892319	196.849584397245	1.79744605695053e-43	4.85952380396982e-40
ENSG00000186395	18736.5839897011	-2.16264712809856	0.430245118280203	184.366173428056	9.23409025949404e-41	2.18443947701156e-37
ENSG00000181449	312.396754714501	3.1341428510008	0.338828675769705	169.700792062167	1.4123463645974e-37	2.96985055000065e-34
ENSG00000182752	886.232322989132	3.50828382622286	0.359394730284784	168.041307549174	3.23812567225415e-37	5.57104803158271e-34
ENSG00000101445	92.9759765260652	7.1014360487478	0.764220258127536	168.055157439163	3.21577929311224e-37	5.57104803158271e-34
ENSG00000119919	52.6406501726941	9.72669489710806	1.29626968100345	166.430035672878	7.24731173071147e-37	1.14296145419762e-33
ENSG00000206073	2704.12677508844	-1.57268677867133	0.243587252136779	156.228036554916	1.18990668054644e-34	1.73222953302626e-31
ENSG00000250026	438.568347443862	3.55043774612782	0.391308140612605	137.772019477757	1.21111697174513e-30	1.63717062073405e-27
ENSG00000087495	119.994363345663	-1.72800459040063	0.384416030066864	132.493696801419	1.69574012274954e-29	2.13945878820234e-26
ENSG00000260027	68.5268089204683	-4.89678124132373	0.589901323438761	129.525647702647	7.47933470989687e-29	8.84665058654989e-26
ENSG00000283098	72.1590624544737	3.46358883233183	0.48340697259517	120.700635225227	6.16864928997134e-27	6.86715810662986e-24
ENSG00000178372	2007.43427844391	1.9574708670684	0.624097989159343	119.997562800161	8.76718795029433e-27	9.21772399774001e-24
ENSG00000160182	48.7230481257144	-5.28292964587759	0.732426443012449	114.336965702253	1.48608400213345e-25	1.4802178810724e-22
ENSG00000005073	50.3191792682959	-5.22423011117054	0.632791179239208	111.605028030066	5.82473386396272e-25	5.51165441877472e-22
ENSG00000186340	2057.73738003383	-3.77324491489226	0.40982073465676	109.577121033814	1.60557462602109e-24	1.44692856178329e-21
ENSG00000156218	175.291965589165	-1.23654857067643	0.490956360804316	108.65506045816	2.54597072789408e-24	2.09489113153893e-21
ENSG00000177508	1007.21214528799	-3.60049107695119	0.46238541051176	108.672361740852	2.52404143622304e-24	2.09489113153893e-21
ENSG00000183844	131.00510697062	7.48546779486477	0.803105379245784	107.42326102018	4.71341039680659e-24	3.71672048998187e-21
ENSG00000140600	65.1467699233127	4.25615120810564	0.559152234756872	105.979842280442	9.69995349953999e-24	7.34286479915177e-21
ENSG00000130775	517.41152742028	-0.516493067725186	0.222813269215024	105.846340869001	1.03695310285506e-23	7.54782210443538e-21
ENSG00000183347	4419.06459355163	2.43956032822628	0.358088363213788	103.343118211675	3.62515857807517e-23	2.54096763296565e-20
ENSG00000172164	361.513706464507	2.14213386282765	0.436937559856194	102.409209424787	5.78259432112842e-23	3.90841419740555e-20
ENSG00000182809	201.685086390259	-0.350043480432442	0.288705308869235	98.6569796721126	3.77493139797003e-22	2.46346816229596e-19
ENSG00000091831	409.03719476537	-3.37985766882795	0.341628638259178	97.4359243978804	6.95116900039977e-22	4.38502911108552e-19
ENSG00000105929	440.423749231241	5.18107929315048	0.473180854536164	96.4869806231443	1.1171676979852e-21	6.82012860786125e-19
ENSG00000107551	182.305182089227	3.18572661903628	0.474688416667779	94.9175210225357	2.44862450803625e-21	1.44813183795581e-18
ENSG00000133466	785.631157250462	-2.2553332599633	0.228457023149006	92.9186747816053	6.65221287233946e-21	3.81494329118255e-18
ENSG00000228630	34.6818356222795	-4.10200916009313	1.14843323284736	92.4243398558104	8.51745021039046e-21	4.74096309504822e-18
ENSG00000111249	111.733479928655	-2.42122879481897	0.59681223018768	91.3334137469577	1.46960695340425e-20	7.94637474090728e-18
ENSG00000186529	495.416409412884	-1.00491013354514	0.365488281296571	87.8392558929579	8.43233662567555e-20	4.43283251780305e-17
ENSG00000090382	59.9040415530929	6.95459667831424	0.994421436737963	87.5910774560058	9.54639056629713e-20	4.88284976938306e-17
ENSG00000134830	367.905160744966	2.12129674893333	0.412880671992636	87.2528216082489	1.13055194769849e-19	5.63044621320895e-17
ENSG00000233834	399.081329907154	5.0654124726194	0.579248762839146	86.8002369072505	1.41764679914069e-19	6.87922196762499e-17
ENSG00000071282	115.059697855871	1.54284755248824	0.443996327769355	84.557888264859	4.34998603372442e-19	2.05808714220587e-16
ENSG00000143153	7102.64424014947	1.57653018894135	0.276266560669028	83.6233408800055	6.94100326592634e-19	3.20386553189405e-16
ENSG00000198092	430.39364387991	1.82428281379603	0.224820643102492	82.8072897674621	1.04381971749995e-18	4.70340194135394e-16
ENSG00000165272	14796.3595967715	1.52566528704028	0.282869573657735	82.6715154572642	1.1171423429878e-18	4.91672531187074e-16
ENSG00000145287	430.046305118636	1.73319880969701	0.457342817441733	82.3483857243521	1.3130317965131e-18	5.64752880659329e-16
ENSG00000160471	150.934622605015	-2.15748907464216	0.407637669513221	81.8830798168303	1.65697187603274e-18	6.96848727864879e-16
ENSG00000038427	1493.39079712184	0.527068872772338	0.542261031257352	81.6827385518921	1.83154962463369e-18	7.53523405352013e-16
ENSG00000150687	6031.467188729	-1.97504464264424	0.283633290837007	81.4531000534902	2.05439550628068e-18	8.27222020348124e-16
ENSG00000166825	221.075734384014	-3.82696765078521	0.495556764890521	80.6041335003825	3.14076036072066e-18	1.23831020472164e-15
ENSG00000136514	166.231196525709	-1.38299666478838	0.343192989083078	79.6819194343642	4.98070753731447e-18	1.92367122742197e-15
ENSG00000167772	3449.50549207636	-2.26295832315335	0.334850406583785	79.3046681266148	6.01464669624645e-18	2.27654377452928e-15
ENSG00000267795	142.885336927303	1.32004117632196	0.35596353243405	78.913408604894	7.31427100129068e-18	2.71416820979267e-15
ENSG00000145335	160.83005158979	3.05239408095218	0.444408943604064	77.9322344424768	1.19462145323075e-17	4.34773288507538e-15
ENSG00000137727	24.6570518795633	4.70946577893114	0.732361994550095	77.846724393641	1.24680513080106e-17	4.45203530196417e-15
ENSG00000112699	1146.83706756229	2.07177680471934	0.269211027787512	77.7676780411308	1.29706959240078e-17	4.5457485252194e-15
ENSG00000062096	125.939620629489	-2.7664517591312	0.488801588882705	77.4388548109377	1.52885513179389e-17	5.26065152167262e-15
ENSG00000124920	268.661595938447	0.570660314270919	0.385285971201987	76.8180479971057	2.08532054563105e-17	7.04726630822635e-15
ENSG00000164309	111.041880325562	-3.93292062358471	0.43375557370712	76.4878143518605	2.45970003364978e-17	8.16663563803895e-15
ENSG00000139278	210.599509176703	-0.622541937202311	0.344004844130223	76.0161963331359	3.11381422716334e-17	1.01601610774252e-14
ENSG00000196208	49.6877185051248	-5.14719609047291	0.729985458349647	75.5784287919604	3.87572284059976e-17	1.2431873687856e-14
ENSG00000124615	193.346127800109	-1.23740798509662	0.286914632234893	74.3494696817293	7.16502635832082e-17	2.24025986245719e-14
ENSG00000253552	180.980919464243	-4.26019576960874	0.487321722504787	74.3339292937703	7.2209168618171e-17	2.24025986245719e-14
ENSG00000103034	1202.62722917658	-1.74989899647038	0.286514343041248	74.020492748238	8.44606123598561e-17	2.57809207888754e-14
ENSG00000109255	169.03111184897	2.19800775891674	0.3080729410839	73.4667170272686	1.11405105887068e-16	3.34657401414724e-14
ENSG00000267313	66.4896437129234	-3.06970195413248	0.632013816475205	72.7911428958568	1.56172353259855e-16	4.61806528975432e-14
ENSG00000258661	40.56544377371	3.06138164006408	0.621247349672593	72.4673737771847	1.83615663054219e-16	5.34604065123246e-14
ENSG00000170915	417.38089240682	2.3651104795064	0.556186849037903	72.4230736688195	1.87728137567472e-16	5.38296212646122e-14
ENSG00000183484	49.0924648134032	-3.69735165177778	0.516108760373228	72.3583382498489	1.93903875463693e-16	5.47706095992595e-14
ENSG00000156413	769.672839245151	2.11882228069307	0.382913571961753	71.4480949628481	3.05663307066248e-16	8.50687953857167e-14
ENSG00000223914	22.7380001315492	6.00530099565017	1.09551243291286	71.2491772238759	3.37627447736804e-16	9.26028905567973e-14
ENSG00000134323	21.7846804403996	7.43870184657073	1.3513972335257	70.9468821297691	3.92717533434941e-16	1.06173990289375e-13
ENSG00000151090	485.277419629536	-2.20464529956979	0.282102810776907	70.2496205588555	5.56530176334724e-16	1.48342726579361e-13
ENSG00000113578	105.172402279437	0.740766918898976	0.458344413986065	70.0953444183142	6.01159003680225e-16	1.58012974231226e-13
ENSG00000198643	1146.40257129127	4.05019996240861	0.469099812189146	69.9712986971073	6.39625165160111e-16	1.63737948691907e-13
ENSG00000164684	136.106760106046	1.113441803893	0.466600961317076	69.9693662079594	6.40243498187642e-16	1.63737948691907e-13
ENSG00000188373	1251.98990305781	0.688827990647421	0.21755570888624	69.1732427865292	9.53281535833775e-16	2.40544707542056e-13
ENSG00000108511	22.9264250160463	-6.15810602434215	1.10349628060468	68.6202586249261	1.25689837922723e-15	3.1298423456415e-13
ENSG00000198478	2849.11888834461	3.28151447103563	0.368449870876517	68.5272682471128	1.31671799279438e-15	3.23621922254983e-13
ENSG00000109794	55.109739721154	4.33662312228553	0.601296928603569	68.4893138036402	1.34194424715229e-15	3.2559352406868e-13
ENSG00000180806	48.9840581138745	-3.53838034083194	0.561823363773972	67.0177072294483	2.80084954526882e-15	6.70963008154587e-13
ENSG00000173597	219.451740395064	2.10047397606969	0.391589568951171	66.0006914042529	4.65727583661581e-15	1.10173681509943e-12
ENSG00000100097	2848.83315666806	-1.58622738377351	0.401222266853152	65.887875200498	4.92753466319692e-15	1.15127893211113e-12
ENSG00000128849	232.706156221279	3.30658087246628	0.450372483572338	65.5953692895746	5.70356689467661e-15	1.31634150587506e-12
ENSG00000079257	409.462254190284	-2.49231051108968	0.314093978730348	65.5051725926307	5.96667665736147e-15	1.32846300871254e-12
ENSG00000186493	90.0354655248358	-2.9153002523565	0.401143171110629	65.5422729783398	5.85701393167076e-15	1.32846300871254e-12
ENSG00000170689	14.6391508785375	-6.09007265488764	1.24156502138714	65.5108418122615	5.94978740567144e-15	1.32846300871254e-12
ENSG00000169508	59.0488081240442	3.89752879385426	0.753921439434711	65.1773635831636	7.0293525492857e-15	1.5468662441306e-12
ENSG00000236130	20.9254719355471	3.41476076597467	0.699358307950642	64.923759810858	7.9796654696113e-15	1.73580654037234e-12
ENSG00000233377	22.3069310360345	7.49648624339533	1.40195456091179	64.2837971122292	1.09888139174902e-14	2.36321935668752e-12
ENSG00000115935	80.666120510897	1.51940545675569	0.411593651123185	64.0059118602826	1.26267864326784e-14	2.68496554200493e-12
ENSG00000122592	34.9600158152312	-4.7008727322272	1.18643634402105	63.5538892493826	1.5828811153492e-14	3.32844723422041e-12
ENSG00000119714	796.370116838964	-0.270972588926174	0.236210826070784	63.2847204810216	1.81091286131225e-14	3.76610174728948e-12
ENSG00000169908	8789.70115453446	0.229642773653219	0.224590018662263	63.0331972874658	2.05359652450869e-14	4.2243819811225e-12
ENSG00000154556	1253.94153888715	1.60275275806907	0.342728623077748	62.2270515442077	3.07303456119416e-14	6.25346011511823e-12
ENSG00000197757	35.3510406089176	-6.04176028599393	1.38355029921916	62.1571425182816	3.18235039841262e-14	6.40701928616584e-12
ENSG00000164125	88.4041827352942	-2.44304263093254	0.386977853502168	60.6119888541517	6.89086674633951e-14	1.37273319131027e-11
ENSG00000138109	54.9047836566457	4.16973045933306	0.721409198239599	60.5331000924327	7.16810451040008e-14	1.41308726936793e-11
ENSG00000137507	56.5118074559212	3.49809352560687	0.640919422836548	60.5051279831836	7.26906236699615e-14	1.41821654943714e-11
ENSG00000070526	1515.52619335934	1.91513334966757	0.304551487824428	59.766442842712	1.05167569025939e-13	2.03091453450602e-11
ENSG00000154227	2658.23125615698	0.793303040954838	0.235434386538011	59.5983319999664	1.14389626218691e-13	2.18669058200882e-11
ENSG00000126778	24.9882083113624	-4.98944517385304	0.870306828131591	59.5753224546138	1.15713252273761e-13	2.18987329928092e-11
ENSG00000243766	12.4676747668889	-7.65862049177269	1.42633715385586	59.0085885667147	1.5362001397678e-13	2.87847402426789e-11
ENSG00000156299	1938.4812365044	0.681598020839717	0.268002955697141	58.7314412224209	1.76453217344341e-13	3.27389915513888e-11
ENSG00000104783	186.103361969405	-0.846835126646371	0.282019119502389	58.5241648354189	1.95721744025689e-13	3.59614952008365e-11
ENSG00000119866	301.632266545297	2.39563143693231	0.302079623825969	58.4541604429879	2.02693740712292e-13	3.68844138748089e-11
ENSG00000139364	43.5107613708425	2.3935310295254	0.498883991112857	58.282478840181	2.20861757655308e-13	3.98077025107305e-11
ENSG00000133135	280.97158882934	2.84476753125738	0.401130234590731	58.0907637574	2.43080950187846e-13	4.2993523199112e-11
ENSG00000173917	39.1238845313035	-4.9751282847909	0.864332519904983	58.0921820379562	2.42908632801053e-13	4.2993523199112e-11
ENSG00000214357	922.49438656895	1.61925465387693	0.353156346944267	57.3401058524903	3.53797058851537e-13	6.19963827663457e-11
ENSG00000168824	722.653700120239	-1.15967387456999	0.251470954966599	57.0902974557945	4.00866184454845e-13	6.95999315670453e-11
ENSG00000042980	263.100656348426	3.21392378072172	0.636596780668758	57.065555243033	4.05856144691409e-13	6.98257048934993e-11
ENSG00000012171	818.053016629981	-2.43717231246711	0.44980659901227	56.8508155389055	4.51858295639998e-13	7.70398040088916e-11
ENSG00000130487	71.8867422534089	-4.25123427583043	0.56001374287981	56.4671279350856	5.47417862370181e-13	9.24989557621042e-11
ENSG00000123364	96.9160962884794	-2.93219188393537	0.497333402460563	56.4168643447394	5.61349789850908e-13	9.40136705568888e-11
ENSG00000182636	157.488274213926	1.93572393760532	0.503242300168835	56.36147617902	5.77113125529148e-13	9.58058412336766e-11
ENSG00000203837	1508.88980657744	-2.22613654860944	0.321601022701798	56.2481720334003	6.10751629527555e-13	1.00508474685295e-10
ENSG00000149177	278.00583465136	2.1154887550395	0.342406396841402	55.9208635017142	7.19347566853472e-13	1.17359075023293e-10
ENSG00000106688	364.040108945827	2.86856922424883	0.680199796002945	55.7693267700275	7.75969340623521e-13	1.25514698900001e-10
ENSG00000164749	18.4317605474631	-1.37859515471292	0.590193775502677	55.7195664756392	7.95517747256636e-13	1.27586214973151e-10
ENSG00000176842	411.008835013197	-3.88808537465819	0.597585728737758	55.4920332411465	8.91370150923368e-13	1.41757816018695e-10
ENSG00000101210	526.496621107504	0.850057441518935	0.427744825991899	55.348149964471	9.57859792307747e-13	1.51062471411868e-10
ENSG00000172927	691.273071252645	-1.79418022080669	0.459260877716188	55.2354729889846	1.01337325406836e-12	1.58496601927634e-10
ENSG00000245848	256.169759246203	0.515879005607574	0.410839733331396	55.155872297349	1.05451924091719e-12	1.63580136347196e-10
ENSG00000158528	16.4992474803122	7.05953980667454	1.4035872894386	54.9992887092637	1.1403973579703e-12	1.75463577232423e-10
ENSG00000164403	404.315085835333	-1.91210948907646	0.314365550368461	54.7847773490524	1.26951183083e-12	1.93754124181111e-10
ENSG00000166634	113.153312459483	-2.71760361032772	0.849873587588176	54.7031595036645	1.32239087093784e-12	2.00209977859988e-10
ENSG00000133401	688.764079026426	2.56636817884648	0.411479507885651	54.5798988478617	1.40645406874969e-12	2.11247168659428e-10
ENSG00000146070	305.180310581353	7.5034830650291	1.02209002620582	54.5008188141491	1.46317935550488e-12	2.18036766164802e-10
ENSG00000213626	499.73840952124	0.972578893386843	0.468264186822211	54.3198584940538	1.60174213120565e-12	2.36820076820835e-10
ENSG00000134873	365.927674037476	11.5561250816769	1.73213375199681	54.1935893975898	1.70612790031163e-12	2.50298221034089e-10
ENSG00000155093	218.179114967509	1.4567281970853	0.620585288375535	53.7571290491296	2.12220701368397e-12	3.08944367184378e-10
ENSG00000232079	15.153138713924	7.91947150789103	1.45884953998994	53.445786886367	2.47967542041123e-12	3.58227918559408e-10
ENSG00000197496	419.162937650799	0.855167911997473	0.459918872154023	53.1982561302588	2.80637341679217e-12	4.02353158430241e-10
ENSG00000115009	589.359295865369	3.00849761996067	0.538457806680382	53.0470496041032	3.02677081585224e-12	4.30689005187997e-10
ENSG00000166165	1059.10422914675	0.638910138377318	0.262334129877638	52.7236063361297	3.55806887863684e-12	4.9878854465335e-10
ENSG00000168907	736.339971530415	-1.84826359555416	0.36952304789266	52.7358091131412	3.5364258116004e-12	4.9878854465335e-10
ENSG00000152931	82.0513180954263	4.79376868903939	0.698361509998573	52.5107307084805	3.95767116128346e-12	5.5072740240654e-10
ENSG00000151229	167.977382972138	1.43700705708825	0.275095641314822	52.2753396404121	4.45199048301083e-12	6.14992115992554e-10
ENSG00000253368	2524.27538216845	3.02442263218629	0.429828685603567	52.0008911482213	5.10681305735777e-12	6.95574675693841e-10
ENSG00000101347	1336.65659693033	-1.05085513514692	0.256803087426797	52.0000957714134	5.10884438158224e-12	6.95574675693841e-10
ENSG00000104044	16.7806054051147	8.0713705214605	1.48575584017224	51.6941746774214	5.95322909398461e-12	8.04749004311849e-10
ENSG00000255398	122.039096612674	3.20186248818761	0.43827911671216	51.4836895853517	6.61391870579585e-12	8.87719230547422e-10
ENSG00000187546	12.8146482757098	6.70814060824546	1.42125362669493	51.4451090322292	6.74274154617802e-12	8.98636505362105e-10
ENSG00000108242	121.27984684949	3.27381871614929	0.544725248174552	51.3004569984279	7.24848598000661e-12	9.5928389630507e-10
ENSG00000145569	176.028623883664	-3.86353388964686	0.501868719464843	51.1106924807368	7.96992335094986e-12	1.0474361070606e-09
ENSG00000158352	220.19281871986	2.05488998060632	0.418513261018576	50.8103132289278	9.2614859121951e-12	1.20878359233305e-09
ENSG00000125998	1619.62238623408	-0.140272921732216	0.417562113560885	50.4623512609018	1.10214732713895e-11	1.42863960041813e-09
ENSG00000258175	24.6449654404454	-5.30555598560495	1.09278725074388	50.4339576144051	1.11790591419609e-11	1.43920880450075e-09
ENSG00000183778	1087.11894452054	3.13202642000832	0.928265300057138	50.2564294034239	1.22167311042806e-11	1.56217321721966e-09
ENSG00000172575	285.576068889535	1.80286109653125	0.250093624040588	50.1821295836016	1.26791171872379e-11	1.61041807227166e-09
ENSG00000156587	1809.72389917996	-1.22968347381539	0.217621942471015	50.1495809835209	1.28871491403338e-11	1.62592864987212e-09
ENSG00000186481	41.0252076333344	0.781027182408928	0.512012624546839	49.9318811888602	1.43691065214039e-11	1.80089629746734e-09
ENSG00000135083	75.0254164835316	3.08603346485325	0.627315365213597	49.8186472255196	1.52061127736267e-11	1.89326108053215e-09
ENSG00000170423	5035.64157845469	4.6680866808426	0.587557118101925	49.6966935292721	1.61621865668205e-11	1.99914627958874e-09
ENSG00000078081	430.971014467815	-2.12751674928267	0.448079438761095	49.6750021438707	1.63384306928959e-11	2.00782338222763e-09
ENSG00000157111	97.8865525217932	3.75572798584276	0.555966045932843	49.5390275484256	1.74878672715081e-11	2.13521218137607e-09
ENSG00000125089	1336.58194121662	-1.63601613791471	0.332903414481628	49.4936529402361	1.78891546868775e-11	2.17020674646896e-09
ENSG00000141756	208.696506527934	-2.44188331058694	0.470694852290683	49.3749543016314	1.89830023406882e-11	2.288237702532e-09
ENSG00000187689	957.935711612299	6.13409128851118	1.09304744059186	49.1990008836594	2.07287302776953e-11	2.48285582598344e-09
ENSG00000250426	28.9672882375063	3.55615263538425	0.64587383015276	49.0282510212007	2.25761853546363e-11	2.68713401155027e-09
ENSG00000159184	14.2563018962445	-3.72026203416584	0.878980260282406	48.7532575303858	2.59038692835746e-11	3.06394203869781e-09
ENSG00000149131	910.878909014954	-3.42968666486952	0.495383070869482	48.684869518803	2.68049442254882e-11	3.15082962402089e-09
ENSG00000106537	1388.23389640241	0.598698796557233	0.223499171479375	48.5126274920889	2.92157331268355e-11	3.41301079892198e-09
ENSG00000157368	147.681072554149	1.92491440262444	0.338878491873258	48.4684079872559	2.98688795994814e-11	3.46790519276187e-09
ENSG00000162723	93.7640431682708	1.0821810670109	0.413626439061818	48.264016336059	3.30827814086820e-11	3.81763193999578e-09
ENSG00000214041	19.6860201599537	3.66812057368979	0.889585395664332	48.1670995062363	3.47253984428391e-11	3.98289797291352e-09
ENSG00000164176	12.9548345927296	4.56757449100487	0.990241394676742	48.1234785408086	3.54910959078685e-11	4.0323623437512e-09
ENSG00000147100	354.200381574261	0.85107318116284	0.261806377014872	48.1183174182045	3.55828011311203e-11	4.0323623437512e-09
ENSG00000130066	21306.4881396101	0.561006386898917	0.228443035065925	48.050730157282	3.68058219302255e-11	4.14613202398522e-09
ENSG00000144278	10.0508929297454	6.36010152588929	1.43856903332412	47.9543957132231	3.86220462312738e-11	4.32498357944886e-09
ENSG00000113430	1116.52540109841	-3.4178238304298	0.469973568970305	47.6546312382905	4.48671318574812e-11	4.99476747295783e-09
ENSG00000165389	2312.11531008558	-0.48445916079638	0.212912677110605	47.3818527849444	5.14234720788472e-11	5.69116496545136e-09
ENSG00000189431	256.734998723968	2.62284477193296	0.366238447977133	47.1273247998629	5.84025011014697e-11	6.42597286828671e-09
ENSG00000175040	303.266768641307	-1.97631826020452	0.539621876045174	46.9527916208073	6.37280815136198e-11	6.97141007309395e-09
ENSG00000037965	18.5766741947206	-6.00894494420936	1.36469371390006	46.8240534935791	6.79651021074154e-11	7.39218136426917e-09
ENSG00000107984	145.899864998435	-3.55772591386577	0.52419911975452	46.6467782055909	7.42644233829051e-11	8.03116692869416e-09
ENSG00000123407	10.2076388058631	-0.0167880360797615	1.89007015982472	46.4205335919545	8.31589901910473e-11	8.94195391684983e-09
ENSG00000156049	36.702322308011	5.41159632369673	0.856407595916876	46.3410755985617	8.65293200524464e-11	9.19794020065374e-09
ENSG00000123388	56.2636779355496	-5.24841417575798	1.12812352344702	46.335346448689	8.67775451338622e-11	9.19794020065374e-09
ENSG00000130513	5502.13764566392	-1.71762465517538	0.553613717534345	46.330279083314	8.69976906693273e-11	9.19794020065374e-09
ENSG00000080031	198.241638002139	-0.582273127511717	0.231593937928603	46.23763773942	9.1122271383806e-11	9.58049436632516e-09
ENSG00000087494	8237.27893721096	-0.552948402485116	0.525441875426267	46.0969682543824	9.77621012089635e-11	1.0221810858451e-08
ENSG00000183876	332.748130852201	1.33028296820787	0.366709766488757	45.9929128375627	1.029830794085e-10	1.0708542735197e-08
ENSG00000143816	196.610050791153	1.59605856623982	0.359614366466998	45.960240504972	1.04679244818236e-10	1.08254355638531e-08
ENSG00000167244	24.3356833431879	-4.89934666047798	0.882854868630611	45.8994028355572	1.07912390424442e-10	1.10991412433835e-08
ENSG00000121005	68.3837500537932	1.42212761031375	0.618850533203349	45.8550729451336	1.10330967442723e-10	1.12865597775867e-08
ENSG00000134765	134.036304499893	-0.154637007777289	0.794339608152712	45.79138536776	1.13900861268973e-10	1.15891064490071e-08
ENSG00000124215	110.332588406421	1.88773688933224	0.387985934798725	45.7716159705499	1.15032319804144e-10	1.16416398518365e-08
ENSG00000168497	124.030615601464	-1.17814747130761	0.452834637373046	45.6765282309595	1.20633497219524e-10	1.21435581642526e-08
ENSG00000130045	23.2464474691896	-3.67929567644716	0.70808995385782	45.6364973685569	1.23072354655098e-10	1.23235148775012e-08
ENSG00000034693	412.924773689403	-0.508177160845662	0.219021654572144	45.466070146317	1.34019597970758e-10	1.33490573241926e-08
ENSG00000159167	578.879274449112	-2.07182093929587	0.464857100925079	45.3938719165391	1.38945970712744e-10	1.37672905536057e-08
ENSG00000129925	1309.84836850456	0.166477441268078	0.15644024922525	45.2698095109451	1.47837893673864e-10	1.45720423842597e-08
ENSG00000196247	422.325627798529	-1.03736663823629	0.258681311206912	44.8938495794868	1.78412150531154e-10	1.74945593202181e-08
ENSG00000268621	139.48804995157	-2.71525123795012	0.444619567005445	44.7404425052259	1.92635511770513e-10	1.87918920631802e-08
ENSG00000135547	11.2784457603402	7.49571949868986	1.48472178493615	44.6601031624577	2.00531137652184e-10	1.94618040003466e-08
ENSG00000137460	1031.97963633643	0.891331499992751	0.147871711526584	44.6408243339225	2.02473486876013e-10	1.95500547914722e-08
ENSG00000109819	29.4090006731025	4.54591901404919	0.858588141665285	44.6272760225972	2.03849729973268e-10	1.95830260900715e-08
ENSG00000138642	3462.61077606848	-2.12989024234999	0.401920329207787	44.594825013141	2.0718427390397e-10	1.98028403213769e-08
ENSG00000013810	907.093294658625	-0.295195110344738	0.282325172962425	44.5697877840347	2.09794236442872e-10	1.99515373099565e-08
ENSG00000115507	129.204541529529	2.12106968389866	0.317295711775207	44.4745965312323	2.20020967870355e-10	2.07339489623304e-08
ENSG00000246223	27.2552296485357	-1.7943951430662	0.932557045523272	44.4728552076798	2.20212615134923e-10	2.07339489623304e-08
ENSG00000227467	59.7912634082097	-3.19415427248095	0.65071854497508	44.431702668768	2.24790707752476e-10	2.10602185357208e-08
ENSG00000181381	1202.2742926979	-1.81699461123054	0.292927528248367	44.0569446637177	2.71116545077746e-10	2.52752739684549e-08
ENSG00000176153	1653.8214266926	-3.23112375991266	0.532313596796627	43.9732215119893	2.82706811804818e-10	2.62266000657166e-08
ENSG00000103485	87.4639618067402	-3.1560625291174	0.59490718518811	43.8942509149815	2.94092886653402e-10	2.71497945361738e-08
ENSG00000007306	1415.38877945978	2.9644477093978	0.425688114316511	43.7890471918961	3.09976819842095e-10	2.84772393956876e-08
ENSG00000134326	712.208869793855	-2.73322031030098	0.51978673780864	43.691819613567	3.25418260125102e-10	2.97514037336597e-08
ENSG00000251381	578.300624825702	0.179744948120292	0.500808746811284	43.5910293674452	3.422380105208e-10	3.11387228322411e-08
ENSG00000198959	2080.02547014498	-0.713175264504689	0.44657259501211	43.5776531487794	3.44534607136961e-10	3.1197691100799e-08
ENSG00000103811	2165.5781051543	-2.19812288525864	0.36766999416681	43.3012123154486	3.95604493430586e-10	3.56515001817802e-08
ENSG00000197142	55.2712301081258	-1.56674595392659	0.505238346406552	43.2814876841822	3.99525372503808e-10	3.58342069887894e-08
ENSG00000143753	1329.90021829506	-0.221613297363736	0.202888961682657	43.2111392782476	4.13828433792792e-10	3.69419957996631e-08
ENSG00000105997	96.6752732278256	-3.69641200974547	0.561385971662524	43.0448705430993	4.49702316231783e-10	3.99559452332699e-08
ENSG00000026559	548.84475926345	-0.171766366830322	0.360567412855699	42.969579061429	4.66954389191081e-10	4.12949150254262e-08
ENSG00000108309	194.821667137284	-0.18759299010335	0.405090969669502	42.8587399209876	4.93563318414635e-10	4.34450502371952e-08
ENSG00000116962	558.932071304963	-2.22352976435146	0.339152821110989	42.5302531661961	5.81664914027416e-10	5.09630023054113e-08
ENSG00000179674	48.8147387136673	1.8060203192293	0.459500258873924	42.4489579036142	6.05795314475184e-10	5.28326097992758e-08
ENSG00000125675	208.420838367519	-1.15648315645622	0.652844959963551	42.4185235403273	6.15084308722719e-10	5.33966538650342e-08
ENSG00000258484	26.0385088708438	3.14276656777683	0.832526497930274	42.3321127263197	6.42241725804407e-10	5.54996559856091e-08
ENSG00000111186	274.135287082811	-0.0396448873525512	0.449017285852243	42.1182383022207	7.1472793859235e-10	6.14828465357283e-08
ENSG00000170561	391.852761469474	-2.74988118484613	0.530087432317998	42.0016864256798	7.57616941047251e-10	6.48773783227114e-08
ENSG00000165794	247.428527461655	0.237112179558137	0.320399654207335	41.98118747665	7.65422047367529e-10	6.49579024503609e-08
ENSG00000173546	242.754528248028	0.57159422329588	0.363708987360952	41.9865570293734	7.63369816471245e-10	6.49579024503609e-08
ENSG00000116741	946.294967957574	-2.32069119700003	0.36498580919843	41.9438318607655	7.79852801263642e-10	6.58871172496179e-08
ENSG00000000971	821.870949227109	1.00305950790852	0.469600555830206	41.8325518297469	8.24473665111789e-10	6.93473960544027e-08
ENSG00000105376	56.8024645434123	-1.17391861955335	0.407239149354593	41.7334095441051	8.66373703590218e-10	7.25492138957738e-08
ENSG00000092969	365.359544644266	-0.239642362910376	0.535962570307821	41.7073820247884	8.77722165659765e-10	7.31757356172293e-08
ENSG00000175147	292.476800521586	-1.32716513414933	0.288117360802537	41.5487323856798	9.50183309252503e-10	7.88693821386123e-08
ENSG00000111199	109.919913314541	1.79214551916285	0.455311774466927	41.481130315415	9.82849453355933e-10	8.12245672696989e-08
ENSG00000170421	5268.12328676501	0.689725585659925	0.542227992226639	41.3672958757282	1.04041315541052e-09	8.56079085484528e-08
ENSG00000135929	98.8374575965309	-2.59332777110329	0.567476635934478	41.2367625195227	1.11058241640887e-09	9.09860269720255e-08
ENSG00000250742	16.4419740046626	-4.07356453486762	1.41548609254956	41.021038503804	1.2370711191957e-09	1.00911943667149e-07
ENSG00000086619	122.480237937963	2.22584259320475	0.477414804498405	40.9483411025867	1.28286426580559e-09	1.04198310001592e-07
ENSG00000179820	703.154563660744	-0.845331814990469	0.309478836132371	40.902390394643	1.3126797252395e-09	1.06164375214349e-07
ENSG00000128342	186.130251927981	-0.993042545576825	0.520947551068108	40.631295677848	1.5032328135686e-09	1.21058217007599e-07
ENSG00000148908	476.272627191865	1.66740872545463	0.317115383537635	40.5719113962589	1.54853626379507e-09	1.24178172848821e-07
ENSG00000239893	19.5550215663801	4.68986095102802	1.50584609655758	40.3730467984937	1.71042595793022e-09	1.36581482083668e-07
ENSG00000214814	439.865196724384	-2.08957630705006	0.51611862802969	40.3124926356453	1.76300461149926e-09	1.40188496943796e-07
ENSG00000131018	74.4593061778214	-2.28377436871138	0.363623929370372	40.2420471981373	1.82620900807814e-09	1.44606717480665e-07
ENSG00000107201	999.509908370622	-1.76570875833524	0.338015543647679	40.1929941134607	1.87155339812601e-09	1.47579783581395e-07
ENSG00000204021	75.5478038845152	-1.62260614287883	0.705677361664783	40.1438211246589	1.91813867287554e-09	1.50625619851326e-07
ENSG00000120594	684.079266331438	0.899534995169805	0.221868589869983	40.1180218989596	1.94304219672772e-09	1.519507172441e-07
ENSG00000110195	11.1074052401158	4.31840872537021	1.0224891304388	40.0512511286751	2.00900640224333e-09	1.5646274140928e-07
ENSG00000078900	85.1291083333432	2.64082911244046	0.409411056204823	39.9676020683731	2.09481407571373e-09	1.62476870421649e-07
ENSG00000088538	170.117241626196	2.54394651079341	0.386543596227611	39.8614448495178	2.20900770445214e-09	1.70634574721456e-07
ENSG00000184058	139.363233458096	2.34587748669556	0.728798089306399	39.7963110895362	2.28213245280886e-09	1.75566490526048e-07
ENSG00000134013	1007.11871464317	-0.764863696175782	0.308005628418604	39.7574934054397	2.32685863882613e-09	1.78282590039614e-07
ENSG00000185008	26.7564413145889	5.89242935122616	1.14476209028383	39.6706400046909	2.43013262633305e-09	1.85444596586101e-07
ENSG00000072682	1796.99985471484	-0.115250146024331	0.21875402372254	39.4619117207717	2.69745834663372e-09	2.05017667510213e-07
ENSG00000136235	1126.37917320692	2.49052237077548	0.4559132706591	39.3529521878508	2.84849203299224e-09	2.15630846897513e-07
ENSG00000111885	389.834248536434	2.82822445664116	0.446227116576361	39.0740143714299	3.27480606726463e-09	2.46915158657303e-07
ENSG00000102359	2213.47781654758	0.881471586817862	0.237685564869137	39.0470354815829	3.31928067784881e-09	2.49275344556702e-07
ENSG00000106077	419.273560274369	0.290781200149418	0.253931062887158	38.9150750420032	3.54567416697714e-09	2.65224836403329e-07
ENSG00000133110	1879.7426683486	5.64200061626767	1.01673546516002	38.9000015364827	3.57249799183823e-09	2.66179230297395e-07
ENSG00000175505	211.117468690724	-1.15146624341526	0.339064265185752	38.7744081417176	3.80403279596402e-09	2.82318904563212e-07
ENSG00000261838	11.5148227107798	-5.01857029021006	1.11289038667043	38.75779230623	3.83576803185809e-09	2.83562148448884e-07
ENSG00000158966	114.161177134794	0.135951231606458	0.400354241087016	38.5487464540686	4.2583961974026e-09	3.13580342551923e-07
ENSG00000141448	57.6162145402323	-0.818830306995552	0.486260132889256	38.4248167335252	4.53061399562734e-09	3.3233282894282e-07
ENSG00000003436	144.298517089892	-0.24956202714715	0.4277125839663	38.413827150522	4.55557729616407e-09	3.3287374644751e-07
ENSG00000256812	932.462348124121	1.42288828433468	0.25772863219167	38.3787193517681	4.63625144298982e-09	3.37465609840701e-07
ENSG00000147168	33.3341755987614	3.27331473100131	0.782248171682912	38.2060395429599	5.05433386058001e-09	3.66487618051635e-07
ENSG00000128713	31.4155619885928	-4.51648145000891	0.928131263709003	38.0682008109757	5.41495966384559e-09	3.91137830680449e-07
ENSG00000131620	93.34783004396	2.10182584101396	0.469356525417379	37.9340842248748	5.79052942083335e-09	4.16675928856544e-07
ENSG00000112796	23.9918365112081	5.02007355030479	1.05184759088568	37.7486739784616	6.3530108346138e-09	4.55419431988887e-07
ENSG00000121236	516.348094136249	1.26654910397768	0.239731105686993	37.633638966441	6.72913329957852e-09	4.80561689413296e-07
ENSG00000135253	602.545516809517	-0.184772556546478	0.515034844326874	37.602069014669	6.83619526874402e-09	4.86372163387145e-07
ENSG00000165188	17.6495219765922	5.16016533540406	1.09397031312718	37.4014326758958	7.55756840571363e-09	5.33682768948248e-07
ENSG00000139971	30.723576558143	3.76751370886334	0.697262864977314	37.4043077667627	7.54671186302029e-09	5.33682768948248e-07
ENSG00000087245	2641.63118739735	-0.694169184386642	0.334162562289775	37.3929170521989	7.58981571278265e-09	5.33967518083314e-07
ENSG00000076716	215.516849195564	1.78286188529626	0.471352863293607	37.2881185480611	7.99812039073107e-09	5.6060899405402e-07
ENSG00000069667	481.704522507876	2.04454979242248	0.343793354328919	36.9209331946233	9.60995211015055e-09	6.71100899205163e-07
ENSG00000266729	60.6229777989378	2.43713936096604	0.480208653309358	36.8962463273207	9.7293070257456e-09	6.76937998022925e-07
ENSG00000109062	7806.39218074398	0.779679766587735	0.201951863592227	36.8588914044475	9.91273341993581e-09	6.871739193124e-07
ENSG00000112299	84.2156956836819	0.787755137691644	0.756202015410722	36.6080407035842	1.12373773473637e-08	7.76158271163716e-07
ENSG00000112761	32.0761535332912	-3.93907722194731	0.691110930947123	36.5066709721606	1.18216234571375e-08	8.10595014225822e-07
ENSG00000176485	112.275591195997	-1.02327034841238	0.458022905015122	36.5086147746235	1.18101395882387e-08	8.10595014225822e-07
ENSG00000136111	475.633565597816	0.0210947047590853	0.20393192489466	36.2609460947061	1.3367050882973e-08	9.13254288665216e-07
ENSG00000153707	22.4600656565704	3.57159248203089	0.797591033962764	36.1651196113874	1.40231008609051e-08	9.54630157527446e-07
ENSG00000000003	2393.76612864262	1.43666029590087	0.283566034494546	36.1133669415499	1.43907029006332e-08	9.76143556969474e-07
ENSG00000137628	3368.03901595534	-2.36558925527227	0.447241275177477	36.0417568483007	1.49152982258614e-08	1.00811435330152e-06
ENSG00000147896	313.743583130239	-3.69892186361689	0.582904909267854	35.9438018422325	1.5663997337778e-08	1.05495071038238e-06
ENSG00000233276	4938.21601996961	0.646728995918673	0.228682118559113	35.7935169459915	1.68863797316281e-08	1.13324374617398e-06
ENSG00000152056	993.994472050994	-1.15003995440829	0.24449428943832	35.7597879058974	1.71735753222412e-08	1.14844492216754e-06
ENSG00000129048	54.9996880316395	-2.73607995029462	0.591545927977948	35.7080321806957	1.76237909294646e-08	1.1744022652821e-06
ENSG00000155792	292.065906347902	1.59423368136803	0.30666750088292	35.6775749160274	1.78942311527371e-08	1.18823973531772e-06
ENSG00000176387	150.944181958729	-2.40401979697987	0.463122324338872	35.5772467144574	1.88147752688165e-08	1.24499867819004e-06
ENSG00000100196	159.420456466741	-0.587505253838125	0.273522904140379	35.5451521379676	1.91191369491672e-08	1.26073054621251e-06
ENSG00000134780	97.0229373502172	0.645950793238255	0.599864057822428	35.5194178050214	1.93667355975192e-08	1.27054093503002e-06
ENSG00000110092	13396.3646344275	0.157069684357455	0.28824204128114	35.5157604105525	1.94021838955708e-08	1.27054093503002e-06
ENSG00000168785	584.436169176337	0.51277827445374	0.275316853096962	35.5038407188111	1.95181631871981e-08	1.27372840799215e-06
ENSG00000163132	15.0420030606794	-4.34218575076212	0.925077799933178	35.4909674060749	1.96442000895378e-08	1.27754806424228e-06
ENSG00000167601	175.95093571708	-0.329164137380289	0.264108438416644	35.3624201177235	2.09482639813927e-08	1.3576914241365e-06
ENSG00000026751	333.36968904912	-1.36430236412754	0.332227559050392	35.200726688313	2.27122060809752e-08	1.46699146785821e-06
ENSG00000115956	12.2797842955653	4.80143659937269	1.22885961648199	35.1410629326356	2.33999613494316e-08	1.50627302223807e-06
ENSG00000127249	1134.64144986014	2.19903834121749	0.372475684702618	35.112010040707	2.37423605240951e-08	1.51844937031654e-06
ENSG00000134339	3139.42095794285	1.04868843961212	0.540188504949456	35.111401037807	2.37495912081214e-08	1.51844937031654e-06
ENSG00000162105	252.472270496075	-0.484117571595047	0.416787537654906	35.0664591961568	2.4289307644159e-08	1.54772776823471e-06
ENSG00000106541	1029.97424676922	0.950193190240153	0.477987747280551	35.019833553228	2.48622119982547e-08	1.57891732237238e-06
ENSG00000261115	77.4033718064378	1.6665847478983	0.767367875207335	34.8762967007694	2.67121224459614e-08	1.69072547588568e-06
ENSG00000168243	80.5365497809721	4.175791634546	0.675543600904383	34.8507019623542	2.70561640576137e-08	1.7067930159678e-06
ENSG00000166546	115.857034643676	1.51035524711827	0.451813113170533	34.8249761244831	2.74064332150222e-08	1.72314534416709e-06
ENSG00000198574	198.427646983195	-1.7850174504381	0.297682166634829	34.8150323108215	2.75430347511899e-08	1.72599977704062e-06
ENSG00000112303	212.767859728407	-0.0280011792920104	0.63155526921109	34.7364268951427	2.86471049553201e-08	1.78926224844698e-06
ENSG00000138821	416.124499746647	-1.6497541173484	0.275000117056407	34.6865285308682	2.93708172698547e-08	1.8224351371541e-06
ENSG00000021355	21617.3167930365	1.66370881315049	0.300989403459715	34.6900656944419	2.93189184845172e-08	1.8224351371541e-06
ENSG00000135046	98948.0107784691	1.03426222110709	0.323220782390334	34.5452898613582	3.15199571731003e-08	1.94939604412066e-06
ENSG00000074416	4229.09349582165	2.17017389968965	0.455705260233036	34.4480464009136	3.30903810188542e-08	2.03985492111341e-06
ENSG00000255690	18.7331775851887	4.56475639026863	0.935339045455227	34.3461256933524	3.48203849696165e-08	2.13260772022651e-06
ENSG00000107485	833.511023359755	-3.09335944437558	0.5247979605772	34.3473740507854	3.47986576080021e-08	2.13260772022651e-06
ENSG00000153802	3982.47563395989	0.110519717059508	0.310845596213411	34.3056260952184	3.55326783276254e-08	2.16921270113003e-06
ENSG00000177409	2706.59500304862	-1.90326794779881	0.314894444038574	34.2191810529822	3.71021645083747e-08	2.25774425505142e-06
ENSG00000106006	16.1117180129543	-5.24190103062614	1.48452400909472	34.1284909641892	3.88232911869543e-08	2.35490636446509e-06
ENSG00000176170	1389.40966797494	-0.182091719969894	0.376104093191913	34.088454541848	3.96082950000292e-08	2.39484659065672e-06
ENSG00000055732	25.8638088355796	-0.108574611902225	0.736463871115831	34.0651056893462	4.00734088047307e-08	2.41525242557175e-06
ENSG00000136689	29643.269507139	1.80227971935465	0.371682997604627	34.0278295749401	4.0827303028512e-08	2.45287844385584e-06
ENSG00000144452	2379.27812607288	-1.93661237067766	0.446350260626121	34.0203657089101	4.09799524501382e-08	2.45425822822426e-06
ENSG00000254087	1516.90776166175	0.904347281467747	0.298572547945298	33.9856999700583	4.16964441054116e-08	2.48929086654547e-06
ENSG00000271605	123.21648538016	1.63541371074286	0.643963197132228	33.8841905843905	4.3867360402782e-08	2.61065973466242e-06
ENSG00000141934	355.78698196992	-0.0157001513400903	0.347596649311735	33.6981868405005	4.81428395899309e-08	2.8561230070202e-06
ENSG00000231574	63.5203146607967	-2.04929144296433	0.53091969676653	33.5919933389862	5.0768148883089e-08	3.00246005503893e-06
ENSG00000223764	53.4165254549353	0.628109969700807	0.725937874608025	33.5372159511979	5.2177838834672e-08	3.07621682226221e-06
ENSG00000126016	130.051873065151	3.74622924399078	0.601877038023179	33.5160851341833	5.27320415506731e-08	3.09923567188351e-06
ENSG00000010030	64.8688943672165	-2.36255669633011	0.44866367075904	33.3197410338097	5.81714869674619e-08	3.40834486334123e-06
ENSG00000120149	65.2750189631463	-2.24288843825784	0.460713762599467	33.3025103812213	5.86748183776088e-08	3.42722511665508e-06
ENSG00000170017	3930.89887863111	1.55221601570938	0.390452098429939	33.1548139957103	6.31718530673717e-08	3.6672617156442e-06
ENSG00000161682	251.990362403011	1.03736663823495	0.283004479250013	33.1600045930699	6.30081158059577e-08	3.6672617156442e-06
ENSG00000173898	3523.8054484708	0.649394614776922	0.181073880393017	33.120392370288	6.42685020392413e-08	3.71951498805089e-06
ENSG00000140263	1658.09362475001	1.05370988630323	0.265680611845673	33.1029531588946	6.48313483686038e-08	3.7406502069385e-06
ENSG00000136158	277.648355041873	0.578474390879617	0.285897086059353	33.0414986311523	6.68543599535929e-08	3.84564973289284e-06
ENSG00000109472	167.61216976357	1.33018247676906	0.319704712467182	33.0169116266558	6.76813067997505e-08	3.88142039753114e-06
ENSG00000283265	24.4973955317281	7.58584310594647	1.57332756062332	32.8921912030452	7.20363055316979e-08	4.11869209120055e-06
ENSG00000181790	204.361977420583	1.23770633921469	0.714685186844728	32.8605984577539	7.31832528119403e-08	4.17166584176497e-06
ENSG00000280693	157.271790206397	-0.102615476385941	0.438307247325135	32.7662901899923	7.67168017153629e-08	4.35995637376349e-06
ENSG00000019582	436.338038244088	1.95583195348769	0.655678105328047	32.7528427164575	7.72343633198755e-08	4.37448377528125e-06
ENSG00000147852	1656.61261878774	0.928262161837028	0.241461083807062	32.7476611716371	7.74347194039217e-08	4.37448377528125e-06
ENSG00000172594	440.840759797158	0.698931886314035	0.362076997678241	32.6929314165115	7.95829702748302e-08	4.48246342991417e-06
ENSG00000244694	82.4636326101817	-0.112368734658303	0.406035828901631	32.6724561604253	8.04018958984811e-08	4.51515097886871e-06
ENSG00000108924	15.5062479963865	6.84334362134165	1.38818360023528	32.5949996853853	8.35768020591974e-08	4.67955910937962e-06
ENSG00000006625	673.416343333544	-0.0748687210743526	0.259245179300575	32.5731197346722	8.44961498661021e-08	4.7170785729085e-06
ENSG00000181458	1176.78326015006	-1.17016834651988	0.533090574529618	32.5253203745283	8.65399060942456e-08	4.80283789687272e-06
ENSG00000175544	7.28523613420456	-6.88071272091386	1.59678692407328	32.5254510823218	8.65342505589652e-08	4.80283789687272e-06
ENSG00000184500	520.642261847367	1.5492019444415	0.30586544988793	32.4165285760771	9.13777075579276e-08	5.05650033781807e-06
ENSG00000110031	282.918484719886	-0.0700825717517981	0.393203250669503	32.2753539234096	9.80609157884315e-08	5.41050388132964e-06
ENSG00000090339	390.820102586912	0.801629815365371	0.410236164954628	32.2614858083572	9.87432387189015e-08	5.43231335103259e-06
ENSG00000174099	85.3578106689706	-1.42874831992935	0.429965702232372	32.1356972420073	1.05153082390622e-07	5.76817995432616e-06
ENSG00000175164	43.4849155720531	1.39197511716445	0.653018922753614	32.074449438581	1.08423094765533e-07	5.93036724982e-06
ENSG00000163221	1038.27167014584	2.34947701889563	0.396677824713521	32.0684811911314	1.08747125929024e-07	5.93094915909733e-06
ENSG00000115267	1676.74284206195	-1.08849719765699	0.27974426297234	32.0183276871276	1.11508630710809e-07	6.02943096057729e-06
ENSG00000172201	179.383516970358	2.28520941121002	0.58545473078619	32.0295314586877	1.10885718468665e-07	6.02943096057729e-06
ENSG00000178690	12.3827126190264	4.83863191092052	1.28604115169398	32.0223216666641	1.11286171314702e-07	6.02943096057729e-06
ENSG00000114378	551.964947173631	-2.55870751157927	0.498862541564977	31.9748765629028	1.139577260495e-07	6.14430189597377e-06
ENSG00000147614	36.2296147594564	-2.46182010254086	0.626976591881584	31.8287568397167	1.22595144349797e-07	6.59123041710202e-06
ENSG00000170786	760.886595680167	2.0815304026653	0.417254460055476	31.8198131316016	1.23144599569624e-07	6.60201571347064e-06
ENSG00000148734	30.9161388977863	-1.23562281941483	0.86766480936378	31.7687767914537	1.263274621035e-07	6.75352322121111e-06
ENSG00000152128	10.2913562540086	6.34147037108757	1.48918182407003	31.6572308382649	1.33573303604281e-07	7.12077400200288e-06
ENSG00000237380	29.5633028084196	-5.72657738973264	1.11977587523777	31.568843294531	1.39608794986666e-07	7.39794111993985e-06
ENSG00000115415	7216.64334111275	-1.61028658135564	0.31265668054336	31.5640298308132	1.3994520057799e-07	7.39794111993985e-06
ENSG00000157570	15.1137349747494	5.50280583169127	1.23575750469758	31.5695642243538	1.39558479983687e-07	7.39794111993985e-06
ENSG00000111348	1469.17993888085	-0.952646577329103	0.307744766815018	31.3490336603546	1.558274034749e-07	8.21457830295957e-06
ENSG00000172331	1342.56215610833	-0.167106366282197	0.263927935628379	31.297116900917	1.59925388802411e-07	8.4071888419045e-06
ENSG00000134762	15493.0157586127	0.273527477336079	0.238776608393818	31.2700116008026	1.62107555301013e-07	8.49829773981071e-06
ENSG00000089127	3747.86268054728	-1.34218027274003	0.326998968017174	31.2253619334103	1.6576727887537e-07	8.6661484881668e-06
ENSG00000121039	4186.59846458486	-1.40319025615435	0.385962704995883	31.1555175404778	1.71658504919565e-07	8.94941378953933e-06
ENSG00000076067	2104.89880333309	0.370915770856171	0.222816752807431	31.0770714247909	1.78525263702293e-07	9.28184235045576e-06
ENSG00000113657	101.838235441554	3.11969518106808	0.833737520409841	31.0538692946949	1.80608406875729e-07	9.3644221921183e-06
ENSG00000163975	634.924993638278	-1.40671133973103	0.372170155740903	31.0286633342007	1.82899014985415e-07	9.45727830218298e-06
ENSG00000173432	9217.44020613348	1.23043616349684	0.546905809454922	31.0027125737252	1.85287662542388e-07	9.55468396080296e-06
ENSG00000146373	990.701485038096	-0.740375738138645	0.231031310582746	30.9787600598535	1.87520056374333e-07	9.64352463827245e-06
ENSG00000138696	154.144561367255	0.61980896748647	0.431205024324602	30.9728881169588	1.8807141890192e-07	9.64566830005103e-06
ENSG00000245694	209.961037291448	-1.51976504089693	0.480117141380586	30.9616065391777	1.89135287781276e-07	9.67401438178554e-06
ENSG00000249267	8.87834127681773	7.07845056966626	1.50284409936687	30.8790472615958	1.97106108615853e-07	1.0054536672655e-05
ENSG00000167555	529.497946120418	-0.409987180965278	0.223890258546695	30.8710521171319	1.97895631558484e-07	1.00676742667858e-05
ENSG00000156113	212.941102802506	0.822470485333231	0.617525048357335	30.8490965850411	2.00080051591935e-07	1.01515146819769e-05
ENSG00000138604	717.227363129372	1.52173833433433	0.318952869030991	30.6899357941381	2.16653204643653e-07	1.09629997269549e-05
ENSG00000133328	136.67704528674	-1.98283676493764	0.615069206311379	30.5086759140913	2.37205743340281e-07	1.19709831805728e-05
ENSG00000014257	365.484586217817	3.22377325195818	0.540134406506476	30.4955913038428	2.38762703190262e-07	1.20175110581801e-05
ENSG00000137965	1934.16747363156	-2.92127423598049	0.527862974711012	30.4808793842253	2.40525507649342e-07	1.2042183154137e-05
ENSG00000136231	1470.95956298924	1.49768268296108	0.283852990407892	30.481234300032	2.40482828284052e-07	1.2042183154137e-05
ENSG00000105855	6352.67359999852	1.11772653761629	0.370388361883652	30.4428164734566	2.45146894489106e-07	1.22411740849771e-05
ENSG00000126803	1164.05394508811	0.98398761951274	0.251530881146003	30.4292046280617	2.46821035878688e-07	1.22923371158004e-05
ENSG00000198948	76.6130196743013	-1.00343831682676	0.401159074348475	30.4036033334451	2.50000813091725e-07	1.24180193904486e-05
ENSG00000198353	12.3668588247235	0.248990617473474	1.04348595153947	30.3316721171833	2.59155891510253e-07	1.28390713267841e-05
ENSG00000139629	1144.59366914379	-2.24460204621402	0.451001181613214	30.1613826352281	2.82188283274868e-07	1.39436377571198e-05
ENSG00000204866	175.760712965578	-3.32291269354277	0.771170571970264	30.1316008086277	2.8642176652429e-07	1.41159685715422e-05
ENSG00000118322	2156.92807036775	1.79033607218621	0.319185851611579	30.0455713273075	2.99010943570956e-07	1.46981353430658e-05
ENSG00000167755	421.371135348399	1.0272544473511	0.436946948686379	29.8732698591603	3.25913141049201e-07	1.59790315915962e-05
ENSG00000159674	525.558167659524	0.546871957794351	0.54824368652662	29.7445683755322	3.47575410182092e-07	1.69584942573542e-05
ENSG00000272899	302.623632767869	-0.242347264361809	0.560355164113152	29.7439509044397	3.47682735632943e-07	1.69584942573542e-05
ENSG00000067141	497.420970052611	1.38965984867578	0.252044452682652	29.687336552289	3.57665274215573e-07	1.74005535077885e-05
ENSG00000139055	68.7726154725445	-0.050770502970851	0.65290036163811	29.6567124325702	3.63184010084878e-07	1.76237368996316e-05
ENSG00000198053	1953.67322753389	-0.397781406640862	0.196977964352865	29.6461803576605	3.65101595291357e-07	1.76714774703042e-05
ENSG00000168453	1223.93737529053	-0.45465161305782	0.365924409822112	29.6074409826807	3.72242433739007e-07	1.79711430064048e-05
ENSG00000164120	6887.71803022962	-1.96900244353651	0.414575300107039	29.4782064933003	3.97089855081954e-07	1.91219478560457e-05
ENSG00000186642	39.4092556763286	-3.2144506460334	0.582099541614122	29.4696544453893	3.98791456265747e-07	1.91551479944905e-05
ENSG00000156966	487.863243974026	1.02697344262974	0.362787387822465	29.4546410032309	4.01796336786056e-07	1.92506219586737e-05
ENSG00000171345	40186.7807879291	0.430045368626384	0.445975196883937	29.3501473464117	4.23346995771859e-07	2.02319239772283e-05
ENSG00000105991	131.54029107444	-1.32014591415814	0.322873204302076	29.3119369343988	4.3151288444732e-07	2.05702300709459e-05
ENSG00000143013	1377.99837521088	1.06902051371224	0.22158713140667	29.2533113491159	4.44348943427596e-07	2.10232593859181e-05
ENSG00000179930	59.8209439140343	1.28949767006432	0.60801245266215	29.2574983723135	4.43419666825683e-07	2.10232593859181e-05
ENSG00000119917	2019.28174483645	-2.51452270217437	0.489147153690007	29.2539111304183	4.44215707312723e-07	2.10232593859181e-05
ENSG00000268460	58.5972435575991	-2.3144059059832	0.533550873310311	29.220207477364	4.51764984250313e-07	2.13208287454792e-05
ENSG00000113389	236.313444655521	0.686654123538881	0.590333509823504	29.199234411962	4.56527359289555e-07	2.14919907327235e-05
ENSG00000127152	442.522950894294	-0.0200024084852411	0.380641701663134	29.0572090017394	4.90125429087091e-07	2.30164360929856e-05
ENSG00000206072	188.967625086343	1.22945626422262	0.463737031125708	28.9774917452969	5.10055714718637e-07	2.38930802006193e-05
ENSG00000167107	936.960833214051	-1.82744914855386	0.329982067401508	28.9717190279087	5.11530045164986e-07	2.39029780364132e-05
ENSG00000180891	1200.4407434124	-0.370445431114724	0.346349719029854	28.9393981070539	5.19863763208579e-07	2.4232565809661e-05
ENSG00000067066	2489.80424237122	-1.12651706096332	0.241394632177909	28.9081079218378	5.28061036273215e-07	2.44940076261534e-05
ENSG00000170542	406.003430201448	3.16458099070454	0.652945571628797	28.9100393130158	5.27551336206918e-07	2.44940076261534e-05
ENSG00000182103	11.3208198381274	6.26272224086486	1.40697768905862	28.8937585827535	5.31863323473156e-07	2.46100572047175e-05
ENSG00000162909	15148.6434384265	-0.00514420773970871	0.16043849755062	28.887449903006	5.33543649928891e-07	2.46275940851324e-05
ENSG00000149212	3573.1492368117	1.46887609696274	0.355586775874821	28.8128891933417	5.53809763324592e-07	2.55008510241312e-05
ENSG00000197093	84.8602647241428	-1.47625527750841	0.387459362537877	28.7095354369712	5.83181301605111e-07	2.67881216817396e-05
ENSG00000117472	5554.02532143327	-0.334397321395836	0.435520549921965	28.6194396051643	6.10053119402813e-07	2.78857426743268e-05
ENSG00000161896	23.385284812942	1.47536370193741	0.842882637722333	28.6238160438159	6.08719648872273e-07	2.78857426743268e-05
ENSG00000188039	31.9740271711389	-1.61263009538465	0.482500976297423	28.6147111461636	6.11497131299637e-07	2.78857426743268e-05
ENSG00000249116	26.8369177527351	-3.49734442171452	0.711619918700847	28.605272520997	6.14389797735822e-07	2.79503051013232e-05
ENSG00000166510	148.179389652271	-0.399170839759647	0.45803109631288	28.5994952769217	6.16167103391577e-07	2.79639386850974e-05
ENSG00000126368	970.499464670668	0.55799422298836	0.192333924242571	28.531560227509	6.37456298424553e-07	2.8860910161925e-05
ENSG00000254750	20.9281362235528	-3.03401630756753	0.851738818856687	28.4977671608181	6.4831860930133e-07	2.92826484034073e-05
ENSG00000125730	30053.1544596058	-1.0153740255734	0.640730661673946	28.4726173024798	6.56522644364678e-07	2.95825977252417e-05
ENSG00000111962	162.727171487746	-1.77154720112394	0.359854323231642	28.4216091699586	6.73481988235436e-07	3.02746950768542e-05
ENSG00000048052	164.409973857302	-0.0348311311552319	0.4034068913896	28.3953114709159	6.82395977476086e-07	3.06027106012676e-05
ENSG00000135299	98.667904536457	1.19531901758888	0.38880760387958	28.3793022738392	6.8788020355115e-07	3.07359867908204e-05
ENSG00000112276	41.0513647069417	-1.76723656980443	0.727164347257328	28.3771640095487	6.88616031667521e-07	3.07359867908204e-05
ENSG00000010932	27.3962264012257	7.20474788344078	1.46444696789774	28.3355458619043	7.0309562447405e-07	3.1308434572168e-05
ENSG00000234380	17.0312628698331	-0.912329791995961	0.687121697703921	28.2834706779525	7.21642957565e-07	3.20589036899475e-05
ENSG00000121578	1131.6721872784	-0.862240470399691	0.28291217391934	28.1551741539877	7.69452143723558e-07	3.41027677282631e-05
ENSG00000169515	78.5654251094321	-2.15435344160548	0.396855323945342	28.1343919130414	7.77489298853141e-07	3.43784695812984e-05
ENSG00000186469	59.9415650899093	1.56734579773271	0.60499215898681	28.1168823528575	7.84325929621149e-07	3.4599925916271e-05
ENSG00000110777	57.6910741443319	2.15068419386777	0.492102180321289	28.1060592260362	7.88581864368052e-07	3.47067715887567e-05
ENSG00000148218	1557.72549505444	1.34388961463117	0.30252848751496	28.0839206665838	7.97359388421367e-07	3.50116622410078e-05
ENSG00000256612	104.115155142805	-4.67050127568314	1.1855244181082	27.9901880443736	8.35618203808801e-07	3.66066539515777e-05
ENSG00000258976	20.2518116885119	-0.467820674139812	0.647840951162609	27.9661320777921	8.45729694115742e-07	3.69640518733035e-05
ENSG00000100433	65.9271761237237	4.15460697247777	0.75499858917699	27.945657087397	8.54432318327094e-07	3.7258367798019e-05
ENSG00000138449	145.991377554789	2.32898777422308	0.450783407247989	27.8968952118506	8.75520206156102e-07	3.80901606931132e-05
ENSG00000016082	36.7941608670804	-2.87696556073102	0.67728446132916	27.8527406953474	8.95064237348246e-07	3.88511254399439e-05
ENSG00000006016	152.176580725279	-2.21258006868415	0.47869827203908	27.8129790704848	9.13036905218445e-07	3.95405570509361e-05
ENSG00000197915	21.2377485906007	1.58390109040075	0.649654686164767	27.7933149546279	9.22058213299632e-07	3.98400723440537e-05
ENSG00000249082	147.701124891203	2.39174995270879	0.527562569176814	27.7853736013973	9.257266866259e-07	3.9907465932563e-05
ENSG00000116117	116.697057666985	0.755859487859273	0.331187181860073	27.748177536524	9.43104477033243e-07	4.05642096087594e-05
ENSG00000158186	204.599230428695	0.189473440371155	0.3075965320397	27.7284132199925	9.52470587205841e-07	4.0874162954355e-05
ENSG00000235098	548.943720916961	1.12138302592022	0.213199141827716	27.6749354275861	9.78282147841203e-07	4.179230168825e-05
ENSG00000105143	10.4941906336589	-3.42778742227273	1.66657915167163	27.6780019230968	9.76783348243089e-07	4.179230168825e-05
ENSG00000059378	1238.56651408045	-1.07985863853326	0.230007000785062	27.6178867047679	1.00658881695778e-06	4.29047147768602e-05
ENSG00000011028	1715.20222458194	0.223171820819906	0.281830972388042	27.496099927984	1.06978810266765e-06	4.54960445909782e-05
ENSG00000182621	89.6977078383417	-3.55281877094564	0.76663600052982	27.4817107692141	1.07751253178736e-06	4.57218041795421e-05
ENSG00000170558	47.4533333574703	1.57842867933204	0.721922504191677	27.4712855248565	1.08314386175529e-06	4.58579364289014e-05
ENSG00000166828	312.63566452695	-2.07463432085563	0.503138736762167	27.4588698293026	1.08988876798425e-06	4.6040502085049e-05
ENSG00000276600	541.37524912354	0.991703841976377	0.242490140258384	27.4523948090174	1.09342301191322e-06	4.60869276179458e-05
ENSG00000104447	984.170811601265	0.0546146368398185	0.22853010703125	27.4255698474395	1.10818731871103e-06	4.65020953583287e-05
ENSG00000015532	1007.8320319836	0.282165377600187	0.209669271752643	27.4264859848509	1.10767980902628e-06	4.65020953583287e-05
ENSG00000123146	595.471525283046	-1.20658354032558	0.291671385747502	27.390924451215	1.1275513474764e-06	4.72099762190063e-05
ENSG00000146072	6609.31540307711	0.343144924666736	0.361956694043738	27.3652259146209	1.14213303866629e-06	4.77149398603963e-05
ENSG00000128487	1152.60047063877	0.801233518144018	0.227272244269641	27.3534314342799	1.14888837083232e-06	4.78914370440565e-05
ENSG00000111335	5620.95102319279	-1.81318323939189	0.38369153028948	27.3091662720615	1.17459971554391e-06	4.88556035531176e-05
ENSG00000198300	11.8276049731207	7.49438238510493	1.60081545858429	27.3044178159588	1.17739179634435e-06	4.88643415478439e-05
ENSG00000178947	86.1925391694644	-1.12200249634735	0.390656163469604	27.2650241441589	1.20081258991089e-06	4.97273047353688e-05
ENSG00000249992	151.719673155494	-1.08570005963288	0.460073107622343	27.233293113108	1.22001603415677e-06	5.02845545123806e-05
ENSG00000165215	41.3047689970491	2.07560334094408	0.69402895003662	27.2296503683684	1.22224016252021e-06	5.02845545123806e-05
ENSG00000110911	1858.18125622736	0.801196154258213	0.206147801291781	27.2328489322404	1.22028701813745e-06	5.02845545123806e-05
ENSG00000008394	2932.08962770277	-1.66333722915352	0.438172470725164	27.1768812056297	1.25491765282167e-06	5.15169557042301e-05
ENSG00000135925	75.2120039874158	3.0819188986508	0.756570572981868	27.155142514477	1.26863218543485e-06	5.19672383319362e-05
ENSG00000111331	4640.45478766356	-1.79905612285671	0.420004519248425	27.1486438538665	1.27276109490377e-06	5.20237661361853e-05
ENSG00000162817	48.7159182040375	0.493908754376589	0.415709310519398	27.0319927453969	1.34920318554656e-06	5.50294618242857e-05
ENSG00000131773	136.647206711492	-0.766735089384138	0.651240320864605	27.0215480695821	1.35626761083965e-06	5.51986334089042e-05
ENSG00000129993	155.830308936645	0.234931573993339	0.51902240709779	26.965715650821	1.3946628933443e-06	5.6639474799444e-05
ENSG00000092295	226.747502092146	2.71479563170402	0.495398318905627	26.9584325108943	1.39975091441534e-06	5.67243812747546e-05
ENSG00000176971	66.2111664266021	2.4290117783126	0.663368544077484	26.8843191074031	1.45259411708765e-06	5.87400505681278e-05
ENSG00000249641	31.0067405165286	-1.7927340518086	0.719441001038589	26.8674998235123	1.46486142303228e-06	5.91098132854711e-05
ENSG00000138496	3433.62352767495	-1.12323563511323	0.245545853145053	26.7033159558391	1.59018852763803e-06	6.4030463586276e-05
ENSG00000141526	4804.37682782351	-0.271405381068606	0.288550536161665	26.6954102064496	1.59648678353607e-06	6.41475846675585e-05
ENSG00000130649	77.0347532551633	2.62815804039728	0.590381191866341	26.6738836766651	1.61376300115345e-06	6.4704374569553e-05
ENSG00000172548	1316.77784070711	1.54297295838452	0.41617200569302	26.6494514524431	1.63359781639192e-06	6.50859761583519e-05
ENSG00000189134	14.3099529343557	5.2862753587228	1.41147329396884	26.6527537194546	1.6309027538687e-06	6.50859761583519e-05
ENSG00000177706	408.04977599983	0.853046622411538	0.364243456332874	26.6556537386751	1.62853964288303e-06	6.50859761583519e-05
ENSG00000154240	63.9544956626702	-1.12693269704365	0.499875601375393	26.5952901977371	1.67844112203523e-06	6.67321391481446e-05
ENSG00000159182	5.89671730804957	-6.58362730736197	1.66825538739023	26.5757548992484	1.6949158750132e-06	6.72458761732176e-05
ENSG00000166387	749.264354277672	1.03515696745897	0.216359950290387	26.5348743485536	1.72991691905258e-06	6.80760175463161e-05
ENSG00000277559	19.3953343714474	-3.98798704564572	0.872780932943148	26.5345147605715	1.7302279756818e-06	6.80760175463161e-05
ENSG00000167600	209.918981025125	2.12627639978317	0.493817163968998	26.5415681180248	1.72413676467317e-06	6.80760175463161e-05
ENSG00000230978	15.9024375815191	0.105649086385333	0.636125614794013	26.5415899997813	1.72411790120594e-06	6.80760175463161e-05
ENSG00000158246	1234.97522854907	1.00450267147018	0.245862261610113	26.4740392810657	1.78334518396445e-06	6.98753780673443e-05
ENSG00000117266	684.430402055346	0.096117407104964	0.336188549102856	26.4777567081331	1.78003353479276e-06	6.98753780673443e-05
ENSG00000056998	30.742862310968	1.27774726337196	0.624868020858949	26.4583650878029	1.79737634245462e-06	7.02796431424663e-05
ENSG00000134321	861.827364393283	-3.16432778978496	0.874034846008834	26.4204170999688	1.83180534518763e-06	7.13311032050943e-05
ENSG00000096060	4114.6297870278	-0.710580051745373	0.312756504235986	26.4204312564216	1.83179237930058e-06	7.13311032050943e-05
ENSG00000126391	3041.50789165216	-0.193978889710466	0.23291388449531	26.3677606136875	1.88067405245194e-06	7.30836887939486e-05
ENSG00000069535	18.5210912233518	3.10053080230203	0.762498535407779	26.3439134740663	1.90323262288708e-06	7.38087651396271e-05
ENSG00000157601	6644.45692604949	-2.15018729665397	0.462830880082796	26.3226173981618	1.92360659500086e-06	7.44463288556059e-05
ENSG00000180113	137.531160860746	6.15025177917555	1.26565513284027	26.2765195440005	1.96845857249199e-06	7.58718502737493e-05
ENSG00000140526	2481.61366130933	-0.409550378774516	0.242142921441023	26.2794606634108	1.96556596403198e-06	7.58718502737493e-05
ENSG00000111057	2719.91896392262	0.202633724618155	0.249678551587261	26.2480821397471	1.99664742814024e-06	7.68019361332401e-05
ENSG00000077092	106.785215668316	0.781512291476337	0.723418116443594	26.2015991523376	2.04359596046272e-06	7.83325125837797e-05
ENSG00000251442	57.013722280468	0.213184521728652	0.461151923556564	26.196349993241	2.04896658535875e-06	7.83325125837797e-05
ENSG00000111961	2990.27867039488	1.46824604750911	0.281170859781045	26.1924219235554	2.0529947815881e-06	7.83325125837797e-05
ENSG00000176399	66.3804717763547	2.65211353504941	0.52729780461821	26.1925621608136	2.05285083345531e-06	7.83325125837797e-05
ENSG00000171617	3369.05562998453	-1.51354882129951	0.342671322377576	26.1402506895832	2.10725302027554e-06	8.02409726533494e-05
ENSG00000139144	22.3087858285525	0.316565421696137	1.09271183588269	26.1171454545292	2.13173847165429e-06	8.10103425222037e-05
ENSG00000168916	343.024183802373	0.283886220093402	0.484340310439678	26.0996784528646	2.15043754671025e-06	8.15571754939709e-05
ENSG00000187608	2526.02644000111	-2.71157964966131	0.516450159153575	26.064078561354	2.1890579189624e-06	8.28558422327267e-05
ENSG00000238042	17.7559208138153	0.700919851143983	0.596646471725821	26.010171663268	2.24886293516796e-06	8.49495629701671e-05
ENSG00000164920	132.276664334474	-1.810991223222	0.383276131597547	25.9772525481167	2.28618453001455e-06	8.61873351205686e-05
ENSG00000084628	16.4356930389621	-2.34735592000356	0.765621593767253	25.9181760009486	2.35472172614296e-06	8.85946494378837e-05
ENSG00000108582	4517.9839506204	0.813665954498028	0.316034897608802	25.8933191540204	2.38416982254263e-06	8.952463073734e-05
ENSG00000109339	450.159883989829	-0.368379351088431	0.303867883640267	25.883638961572	2.39573740542333e-06	8.97808522725477e-05
ENSG00000145358	47.1113705564578	0.0574007790855885	0.358117690575157	25.8697037416025	2.41248825822706e-06	8.99123766118317e-05
ENSG00000172782	18.442676522141	0.142432846326459	0.76742928796346	25.8688651716255	2.41349999042592e-06	8.99123766118317e-05
ENSG00000125813	465.321053605306	12.8655372297001	2.33451476782132	25.8694384213461	2.41280832045796e-06	8.99123766118317e-05
ENSG00000171236	998.132043462836	1.44258743318571	0.350667589830969	25.8647525740385	2.41846797362278e-06	8.99204447953067e-05
ENSG00000159348	2473.61684360734	-0.340419073336553	0.259113765652718	25.8160698181829	2.47805913982576e-06	9.17920496471064e-05
ENSG00000115738	238.856989309676	2.0670185125655	0.586082260398861	25.8148221728896	2.47960549151133e-06	9.17920496471064e-05
ENSG00000152952	1894.69949015534	0.0658356974439129	0.387673150232676	25.8117986450115	2.4833569045875e-06	9.17920496471064e-05
ENSG00000170458	589.211785706818	-0.950275315548208	0.358117672757413	25.6805664072764	2.65177003384173e-06	9.7714750806302e-05
ENSG00000101846	2257.73854639077	-2.36396414740116	0.54821418843408	25.6789476850905	2.6539171421104e-06	9.7714750806302e-05
ENSG00000182704	2083.15392488351	0.326513063279225	0.206422811447819	25.6675683782961	2.66906004888864e-06	9.80814784955678e-05
ENSG00000160145	321.035039282255	1.533856034975	0.450580378066701	25.6381849068024	2.70856264412383e-06	9.93402093799294e-05
ENSG00000186007	117.56175453148	0.728844739677486	0.477884528104819	25.5985045310028	2.76283766890795e-06	0.000101134821826079
ENSG00000124134	30.9406891358981	0.495225002756556	0.615416547054249	25.4873785386124	2.92069408582268e-06	0.000106706825432807
ENSG00000011677	28.0887959365955	1.28511827916959	0.825582292496711	25.4617916403574	2.95829987800356e-06	0.000107872495551479
ENSG00000139679	2090.6711706986	1.1802210134278	0.302657773975654	25.3230208875649	3.17085134264644e-06	0.0001154006954992
ENSG00000151092	559.998546125361	-0.696156089944744	0.234719901221854	25.2821113217666	3.23637830366601e-06	0.00011755942302664
ENSG00000225431	19.5880871012979	-0.432016138870679	0.658764243442104	25.2504324504153	3.288048845453e-06	0.000119207518008042
ENSG00000159216	2943.14173086478	0.164784826197458	0.289165335087063	25.1921683591789	3.38524532664542e-06	0.000122496687967045
ENSG00000228314	85.9510144693561	0.699411836252778	0.796006718566277	25.1385286155957	3.47726564300519e-06	0.000125586359339453
ENSG00000136052	35.2811005697823	-3.34726121552005	0.679397982382213	25.0613396422302	3.61409231964955e-06	0.000130279423141653
ENSG00000188290	1126.69333543992	-0.255416713524432	0.302907535837151	25.044089583055	3.64539878837165e-06	0.000131037035364776
ENSG00000164251	1868.33502525603	-0.908471989597214	0.328796448900269	25.0421381835498	3.64895733882361e-06	0.000131037035364776
ENSG00000204103	975.680292154867	1.94165282735927	0.376745306449239	24.8869608448409	3.94334810596158e-06	0.0001413406494419
ENSG00000285976	291.878587429981	-0.465174593445779	0.192325135505294	24.876129129434	3.96476265491028e-06	0.000141571949517315
ENSG00000106415	186.32284721333	-0.180648232885043	0.333568853696828	24.8775444909336	3.96195786126817e-06	0.000141571949517315
ENSG00000079393	14.526569654699	-3.60332454440983	1.13127484452826	24.8551679838951	4.00653415067302e-06	0.000142794084371915
ENSG00000254369	9.62411645501525	-5.03084979354661	1.502576789424	24.8441506132193	4.02866578875319e-06	0.000143312970022846
ENSG00000236740	122.579602706969	1.98400099087209	0.395262214406904	24.7586169200266	4.2046964289904e-06	0.000149294333806085
ENSG00000132821	291.046853418797	-1.13381415268946	0.629712408921459	24.7488309281513	4.22532040690936e-06	0.000149745671724269
ENSG00000185761	241.847221615699	0.676528355740352	0.284017973238857	24.7359669429469	4.25258522606947e-06	0.000150430234398813
ENSG00000080854	17.6901351600193	-0.943881003928308	1.08746904871632	24.7202249341748	4.28618941892157e-06	0.000151336072300542
ENSG00000230148	11.0939297809431	-5.6684541241261	1.51082197844407	24.6964046356921	4.33754378661236e-06	0.000152864089686479
ENSG00000108578	391.232599613735	1.92316238020126	0.389444369071849	24.6219896743907	4.50197289031781e-06	0.000158364009199377
ENSG00000198759	65.1525302692372	0.312709394777286	0.751515626687717	24.6036162033881	4.5435218820801e-06	0.000159529038252998
ENSG00000143995	1461.57321509164	1.18988769236546	0.300385415329683	24.5922878897131	4.56933012458164e-06	0.000159842093544746
ENSG00000057149	20376.8099199668	-1.19815253581199	0.245055702916468	24.5927093886598	4.56836724213138e-06	0.000159842093544746
ENSG00000163644	463.074758900932	-1.37591386007906	0.348922396459676	24.5621334769708	4.63874483283522e-06	0.000161079350387902
ENSG00000173267	850.215304825299	-0.772135790056716	0.280765350198476	24.5729568737972	4.6137091486708e-06	0.000161079350387902
ENSG00000087258	47.7107325024884	-0.947946856614933	0.8124054467024	24.5662447418086	4.62921907265894e-06	0.000161079350387902
ENSG00000280350	7.3281031874564	6.87719813316472	1.77040349398076	24.5642836542883	4.63376045068106e-06	0.000161079350387902
ENSG00000106066	57.2233473871726	5.18235607002969	0.982988772230105	24.5565576311715	4.65169533989969e-06	0.000161233213017585
ENSG00000007237	223.805538491075	4.00211196294165	0.729175635702558	24.5270383355929	4.72086190617756e-06	0.000163331465401116
ENSG00000250421	5.57548969362033	6.4617353683261	1.62059245290532	24.5162496643287	4.74639662928655e-06	0.00016383911428122
ENSG00000120075	13.7645554726686	-3.7343261904787	1.26676442654282	24.5135325178446	4.75284933899021e-06	0.00016383911428122
ENSG00000112584	20.4715667403038	0.452850982866553	0.950458517299309	24.4932586279092	4.80127373422994e-06	0.000165207464400548
ENSG00000188508	2079.71631757189	0.464478678246973	1.39039187001812	24.4534674761093	4.89775442719392e-06	0.000168221420208067
ENSG00000182158	4069.20235873753	0.814746413691025	0.22879940631055	24.4399112226952	4.93106479068229e-06	0.000169058697760258
ENSG00000153714	821.519119454178	-1.489449476508	0.35541634795661	24.2625674955087	5.38828315579377e-06	0.000184400106190592
ENSG00000229847	6.23141742934742	0.945003698448851	2.02241490014547	24.2485391174568	5.42621045148657e-06	0.000185362875080114
ENSG00000153551	435.646987423015	1.48426337224618	0.612195340399464	24.2416328238681	5.44498034165422e-06	0.000185668924262714
ENSG00000176194	8.72722596997246	-0.978579691192067	2.09193463051104	24.207008635416	5.5400650371957e-06	0.000188571458325411
ENSG00000233608	92.3128156320225	-3.23274300338448	0.65888856952716	24.2029815812119	5.55123134635557e-06	0.000188612303823661
ENSG00000123612	46.3277061078496	2.13277076648246	0.744096654590491	24.1523495430019	5.69356042654517e-06	0.000193101489377002
ENSG00000179388	36.3009599441751	-2.45928121024407	0.704662148370783	24.1287901789542	5.76102533541814e-06	0.000194691793701408
ENSG00000135114	594.45828891485	-2.66095489232417	0.516992389725771	24.1294141864171	5.75922815439484e-06	0.000194691793701408
ENSG00000111674	131.767202598722	-0.297380410297308	0.397389910049285	24.1112536811119	5.81176154841377e-06	0.000195359835352985
ENSG00000189377	4149.56328212283	1.34657755942546	0.340343639237401	24.1170905947398	5.79482489978183e-06	0.000195359835352985
ENSG00000183741	993.204655874606	0.650417884834251	0.220804206232418	24.1124393466063	5.80831716692097e-06	0.000195359835352985
ENSG00000091513	92.9561860265966	6.54149491208627	1.36497703119321	24.0762658113049	5.91432664445366e-06	0.000198455020826747
ENSG00000155893	405.790431884971	-2.4107129345869	0.475073721750178	24.0688766083221	5.9362181397689e-06	0.000198837041230312
ENSG00000166016	383.188697139364	0.109880802800717	0.341302464681013	24.0469936767889	6.00152569599663e-06	0.000200669388333456
ENSG00000119699	247.291970556125	-0.336389267165982	0.396055748084318	24.0267376239913	6.06261815748805e-06	0.000202354583122507
ENSG00000153064	31.4341315330805	1.83274222081116	0.766811858715823	24.0036588787697	6.13298216486683e-06	0.000204342759630466
ENSG00000162543	16.3208813296101	-0.957369183303498	0.81552070676929	23.9922830282898	6.16796550591618e-06	0.000205147183127353
ENSG00000244300	36.8728018199987	-1.36729702581777	0.641683643864336	23.9683975914477	6.2420694013878e-06	0.000207247655125025
ENSG00000069188	702.653732016899	-0.179651469369254	0.206742720732593	23.9623893003703	6.26084968155549e-06	0.000207507145750329
ENSG00000165449	572.463299988342	0.998955002720709	0.439417243851102	23.9431360494008	6.32141157227812e-06	0.000209148101407978
ENSG00000144711	783.985475552295	-0.261250492911638	0.206819922687786	23.9178941643808	6.40169933217667e-06	0.000211434833964125
ENSG00000001561	162.235117404249	1.04901844437393	0.56274407108685	23.9024123827464	6.45144648297347e-06	0.000212706663223472
ENSG00000197416	48.2656691562007	1.42936949418672	0.629450873115179	23.844571041225	6.64075085290346e-06	0.000218019812932927
ENSG00000107242	58.1442123450514	1.3249579646634	0.424817948586579	23.8457511225898	6.63683369549326e-06	0.000218019812932927
ENSG00000166313	20.2517692617671	-3.82957294463416	0.810174760265121	23.8426428521782	6.64715625164063e-06	0.000218019812932927
ENSG00000119900	1772.95601832658	0.618945752669112	0.321637832644681	23.8158290473289	6.73687410228511e-06	0.000220199209647229
ENSG00000069974	634.139175094898	1.19836819121008	0.264380331491201	23.8187808205991	6.72693857349549e-06	0.000220199209647229
ENSG00000161714	2784.62614166411	0.245257789844774	0.242183750094256	23.8013700065068	6.78575495075979e-06	0.000221414504212291
ENSG00000188906	419.031038164099	1.61407389377287	0.330535207600418	23.7331508619823	7.02120690446231e-06	0.000228702823867383
ENSG00000257042	26.1669559693607	-1.36137045249525	0.952027696869176	23.6905884652742	7.17222785507778e-06	0.000233220639445614
ENSG00000146411	216.664275410436	-0.113731377149976	0.388936655064001	23.6289772366288	7.39661112806764e-06	0.000240104400683842
ENSG00000038295	187.210514878776	-2.35348846165436	0.488126168246931	23.6148496812563	7.44904411416621e-06	0.000241392397021568
ENSG00000173221	479.082382705432	-0.544651457311476	0.360433918276428	23.604483046347	7.48775511357335e-06	0.000242232077819446
ENSG00000183439	7.64581053471706	2.71349481981542	1.77053282212262	23.5778480483658	7.58814024050073e-06	0.000245060672442792
ENSG00000170293	94.6928514760968	1.44812305224726	0.318920004697638	23.5550853040952	7.67499702550366e-06	0.000247443473096519
ENSG00000146938	12.1427606276998	-7.50149865041452	1.63747692836226	23.5260618103311	7.78718670493775e-06	0.000250633517671678
ENSG00000138646	99.3042708233033	-2.34247964269513	0.672123335766869	23.5007617667119	7.88632048687189e-06	0.000253393234658829
ENSG00000197353	516.677593699413	4.93438560621597	0.924007207619586	23.4398340618837	8.13026507047293e-06	0.000260347320573097
ENSG00000187714	10.4746372785853	-2.73457919953677	1.64286253201333	23.4425165595775	8.11936767151766e-06	0.000260347320573097
ENSG00000035664	439.691457998621	-0.69154794260406	0.400827558138707	23.4348378993055	8.15060052275205e-06	0.000260557626508586
ENSG00000113504	126.947292223488	-0.713411184603513	0.416065273687236	23.4083716645599	8.25917518231538e-06	0.000263583288912847
ENSG00000026025	1543.20442122895	-0.452502646102916	0.443227457225432	23.395224146368	8.31364785925642e-06	0.000264429891993996
ENSG00000258689	120.940568549975	1.0379511924682	0.332390272264007	23.3958363628807	8.31110337247036e-06	0.000264429891993996
ENSG00000154065	350.71562133632	-1.80638003477169	0.422754102809229	23.3908466406671	8.33186430808573e-06	0.000264564651057924
ENSG00000170537	205.194081541458	-0.777193493440526	0.363516809020824	23.3866363387188	8.34942261530993e-06	0.000264678095468577
ENSG00000169991	2515.07268312242	-0.132258972048075	0.213809450639004	23.3443459335347	8.52785266961265e-06	0.000269882293933812
ENSG00000128683	28.0889399257291	-2.38707584315075	0.755560381462082	23.3362177759665	8.56258105637079e-06	0.000270316550643695
ENSG00000148082	63.0784066015303	1.62001345475625	0.602139236893812	23.3344525979992	8.5701416320326e-06	0.000270316550643695
ENSG00000101160	1807.26923219719	-0.313192012153301	0.296109141144394	23.2816940636322	8.79922391526753e-06	0.000277080387015704
ENSG00000159763	18.6725038576564	0.442044403206823	0.845172066952386	23.2331771791811	9.01528949178998e-06	0.00028341254756167
ENSG00000258837	12.9777560507915	-2.30805858880525	1.10390845941733	23.201373742499	9.15979397585997e-06	0.000287477779424793
ENSG00000197712	1901.31880205595	-0.0749592334640063	0.240158262749065	23.186094671133	9.23003852502052e-06	0.000289202779943731
ENSG00000158856	398.514140203767	-0.113514834586692	0.269239414766329	23.1743422488319	9.28443584887412e-06	0.000290426361057756
ENSG00000144810	126.107051485917	-2.97937395877628	0.730057983892616	23.1622509685185	9.34073622149073e-06	0.000291705334969822
ENSG00000170271	162.275425602247	-0.652232088884127	0.287070128476936	23.1529530738089	9.38426190836104e-06	0.000292581806615704
ENSG00000116711	452.046321669684	0.333156995723362	0.380734628253783	23.1281014846422	9.50159629594721e-06	0.000295752812336844
ENSG00000177707	62.6817609809525	1.57883883083276	0.658911439606892	23.1201096153776	9.53964001313002e-06	0.000296361596537294
ENSG00000152242	1515.8215323907	0.774184001232653	0.195630975965998	23.117420720827	9.55247418165122e-06	0.000296361596537294
ENSG00000101335	170.981799741773	-0.374794459301291	0.496555481691496	23.0883258251857	9.69245400734039e-06	0.000300212262011321
ENSG00000232756	17.866552435218	0.0928193747824103	0.825159422970667	23.075320443214	9.75568640821111e-06	0.000301387786793432
ENSG00000125845	508.194861672429	0.455419931671893	0.292558000571086	23.0739738731003	9.76225697777403e-06	0.000301387786793432
ENSG00000203485	2668.90331767682	-0.434325353032859	0.226618538318993	23.0350137906938	9.95429048366826e-06	0.000306815875249873
ENSG00000283167	16.0756274456347	-6.55993363248512	1.53989284746077	23.0187251549859	1.00356924210558e-05	0.000308821917184521
ENSG00000248485	371.178490243669	1.02919278500425	0.412778417629888	22.9941523340896	1.01597556424331e-05	0.000312132103138061
ENSG00000110811	149.212514139557	0.0127322931092147	0.488329218109459	22.9802242162759	1.02307557166083e-05	0.000313803973965661
ENSG00000137486	295.031595692933	0.535961622043164	0.350499273369329	22.9619924222367	1.03244446125259e-05	0.000316165233482284
ENSG00000047936	82.2321493095926	-2.36057183151328	0.78344662278155	22.9530405123787	1.03707599366058e-05	0.000317070487561009
ENSG00000187054	3988.17628592888	1.99723579037769	0.482140508139742	22.9363009343848	1.0457925277919e-05	0.000319219735297769
ENSG00000140682	177.817886224268	-1.15842181768761	0.365131448408152	22.9000137414288	1.06494014345772e-05	0.000324019167442723
ENSG00000108821	4765.81926571274	-0.0229345179087961	0.298903735208108	22.9023407654314	1.06370179337744e-05	0.000324019167442723
ENSG00000118523	318.444467715527	0.184139489788778	0.342572907932995	22.8856019808148	1.07264168955022e-05	0.000325838587074446
ENSG00000064886	42.1442610611666	1.61016120556625	0.525677307923522	22.8823501133833	1.07438715245713e-05	0.000325845783016845
ENSG00000183196	141.73315825601	0.057082793264547	0.513059933829771	22.8718514734347	1.08004178289434e-05	0.000327036651860405
ENSG00000174514	114.979886129067	2.52724309205934	0.654821131009299	22.8580929919496	1.08749726495696e-05	0.000328768142800487
ENSG00000249326	7.93189816622034	-5.80049870580619	1.41725011526926	22.8390347227379	1.09790970475729e-05	0.000330858935709105
ENSG00000151474	117.142483674236	-0.96936997379145	0.40131234817494	22.8398620122667	1.09745565407042e-05	0.000330858935709105
ENSG00000110852	209.117272580335	-2.21943463137499	0.466763629813074	22.8269143370716	1.10458345095098e-05	0.000332340887269432
ENSG00000164199	99.9691253431208	2.57126599550242	0.831063235311364	22.7373491140131	1.15517391450068e-05	0.000347010576697228
ENSG00000138771	610.33913352821	1.07007142094658	0.547294430878814	22.7324631617388	1.15799942673229e-05	0.000347308068952593
ENSG00000165591	172.011663734489	1.18625443327753	0.247894753725979	22.7136684802027	1.16893283397063e-05	0.000350032498147061
ENSG00000188921	244.368748192947	-0.137058141061486	0.317079866553799	22.704128345307	1.17452204228311e-05	0.000351150547396648
ENSG00000183508	75.6172092083403	-0.749854844581864	0.497607447285095	22.6327530631468	1.21719488090105e-05	0.000363334591814705
ENSG00000127507	876.831645783512	0.274192606262455	0.278447707733423	22.565118212448	1.2590611935253e-05	0.000375239891141202
ENSG00000163399	22140.3191207701	-0.378965122713275	0.201076710910672	22.5587646572276	1.26306731083749e-05	0.000375841963169805
ENSG00000233101	5.35179492384312	-6.44441456261644	1.75127051033125	22.5516277590941	1.26758255361973e-05	0.000376593403881527
ENSG00000205476	1755.87815785434	0.482647302450309	0.198874532072576	22.5421137307666	1.2736268267293e-05	0.000377796045389529
ENSG00000100219	3668.73660189835	0.972063623498266	0.220165875975984	22.5248584556401	1.2846627559239e-05	0.000380473280999371
ENSG00000152527	135.878116214255	-1.13888169451621	0.457281896524951	22.5043541791785	1.29790104048713e-05	0.000383793393612796
ENSG00000068724	1304.8379640184	0.850089210831029	0.189062725576765	22.4774935094777	1.31544986558384e-05	0.000388375798848272
ENSG00000261222	41.5585018457374	-4.30032604540243	0.993020035779655	22.4698741868169	1.3204708421062e-05	0.000389250945278191
ENSG00000136810	6616.12310067828	0.863925530339424	0.253246816124205	22.4153656561651	1.35695421021201e-05	0.000399383490330672
ENSG00000165238	19.5392520089835	2.01550294984091	0.717559939353934	22.4010328805808	1.36671359831059e-05	0.000401008602295007
ENSG00000151150	889.3609598471	-0.210823518222012	0.183382813135516	22.4014131104241	1.36645379035942e-05	0.000401008602295007
ENSG00000077274	13.0904810527682	5.32064485569259	1.52929223362842	22.3581663523938	1.39632291040933e-05	0.00040906209101388
ENSG00000088756	18.4927899399524	3.4953296967218	0.909028315697467	22.3438797180692	1.40633299786879e-05	0.000411357835929935
ENSG00000160868	8.72002025442919	6.92435344236041	1.55848001940584	22.3312808379342	1.41522007070644e-05	0.00041331851602036
ENSG00000166147	191.267983621235	-0.467833541558347	0.407753246701013	22.3197367459218	1.42341240658821e-05	0.000415070566944249
ENSG00000069966	498.968495904966	-0.599297556786512	0.19450402408889	22.2813711440926	1.45098101962489e-05	0.000422458704560017
ENSG00000138623	312.240029306566	-0.483208919198022	0.373023987335945	22.2620394317773	1.46507399405593e-05	0.000425906687212113
ENSG00000162614	34.7367138028323	-0.068434058454605	0.402871265315018	22.1813698098835	1.52537542490638e-05	0.000442756593809097
ENSG00000117152	18.7369153479813	0.871004659106914	0.589742817774142	22.1709438803754	1.53334791533457e-05	0.000444389116350792
ENSG00000132321	199.278187786966	-1.25520569068205	0.357027543965257	22.139323483985	1.55778310337348e-05	0.000450092293608293
ENSG00000169902	911.525279246558	-0.846542614986661	0.301415412834128	22.1419469703798	1.55574103161423e-05	0.000450092293608293
ENSG00000136205	688.454117233183	0.0575301941456382	0.309173188305333	22.1358736696013	1.56047245342466e-05	0.00045018203019911
ENSG00000153721	372.558149700263	1.31256839335404	0.285288341351331	22.1266132963847	1.56771448512195e-05	0.000451582901536271
ENSG00000189337	1161.05313840101	0.687376368121551	0.245909061591855	22.1124066896412	1.57889008154543e-05	0.00045411086311926
ENSG00000149564	26.1619328909945	2.58416454133799	0.7038017700866	22.0888109945648	1.59762790163809e-05	0.000458802853391516
ENSG00000158315	870.138488967537	0.88448595938621	0.197035336342071	22.0848772943578	1.60077328847998e-05	0.000459009613401266
ENSG00000186526	7.36282034590609	-2.0492205327431	1.91969280044121	22.0528324412337	1.62662813652413e-05	0.000465717662386069
ENSG00000070404	2560.03400265717	-0.745418095685017	0.276791273046757	22.0482075297367	1.63039399462103e-05	0.000466090730335392
ENSG00000232679	24.2661945477048	4.02915081864087	1.14241375857625	22.0012543670963	1.66912290424808e-05	0.000476442699289516
ENSG00000064787	1709.09854371954	1.27597178930287	0.32222803693944	21.9951696089146	1.6742087414716e-05	0.000477174705306478
ENSG00000104267	2412.50506799289	-0.21394544421693	0.526207009312651	21.9808435145866	1.68624423157982e-05	0.000479882286957113
ENSG00000142156	1520.23743431076	-0.984487549825199	0.41178425931994	21.9243915108591	1.73451825070104e-05	0.000492879247665423
ENSG00000085831	544.842981259183	-0.408133903429821	0.289201522272514	21.9124838438779	1.74487608737237e-05	0.00049507915972297
ENSG00000118513	30.4450550595901	-0.422379916316506	0.614498138971311	21.8582367970376	1.79285095738328e-05	0.000507929706114949
ENSG00000117643	16.9585695629679	-1.48301032774168	0.56650314818355	21.801892941157	1.84407720852681e-05	0.000521661601963675
ENSG00000111666	118.592777493325	0.0919117371884864	0.388918707086658	21.7783731515282	1.865891377295e-05	0.000527044691273251
ENSG00000136694	1259.59847054594	6.51627272034928	1.54866249436705	21.7528372820583	1.88986769493452e-05	0.000533021551812755
ENSG00000167741	1128.76452486611	1.70980451438763	0.36048627570216	21.6983509322524	1.94206142444063e-05	0.000546927268713376
ENSG00000164099	1184.11986994547	0.0125146836758081	0.232165316152727	21.6507042656041	1.98888331336037e-05	0.000559281080317161
ENSG00000167191	44.8941838995997	2.70422578304449	0.824345324972492	21.6302917520203	2.00928630918224e-05	0.000564180169158368
ENSG00000171243	9.83134464684284	7.22295599559269	1.69281348912578	21.5871756907088	2.05307284497408e-05	0.000575620793942731
ENSG00000105516	383.591191322972	1.42152860861106	0.314136944582003	21.5384043848057	2.1037537994695e-05	0.000588957701996454
ENSG00000128274	2344.47365530958	-0.545463141293694	0.298960691243139	21.5232040922313	2.11980354906449e-05	0.000592574330369948
ENSG00000175928	35.4244239654581	0.601550957434996	0.817072199954066	21.4191358861314	2.23302578916979e-05	0.000623304027434192
ENSG00000196782	551.14008131197	0.637087153729457	0.290796043521858	21.4106835361781	2.24248291654387e-05	0.000625021932188405
ENSG00000198535	225.579776021186	0.549110097635016	0.562996520741721	21.3860568378584	2.27026609261795e-05	0.000631835085335217
ENSG00000243244	102.189450055447	-0.397507237180028	0.535255753990439	21.2650232915439	2.41189758945814e-05	0.000669283898540987
ENSG00000152778	1068.1928944671	-1.11241980186286	0.251680449196467	21.2658044814887	2.41095569834679e-05	0.000669283898540987
ENSG00000169550	878.048746974973	1.01256813119037	0.455641163477412	21.2348465172355	2.44856516571693e-05	0.00067846406678174
ENSG00000185052	499.71005066938	2.28015759106989	0.544258596831828	21.2254104555459	2.46014486690773e-05	0.00068067604687469
ENSG00000196975	3591.68053934742	-0.728284298085739	0.243083990437353	21.1282650745008	2.5825904038237e-05	0.000713511290399468
ENSG00000170899	615.444302971551	-0.201811014519441	0.277174294351228	21.1044496758712	2.6135269397409e-05	0.000721005792049513
ENSG00000105963	121.709865022102	0.893519066758498	0.320492260659756	21.0936028410075	2.62773969331508e-05	0.000723871523959066
ENSG00000138061	907.065394279854	0.116736151872417	0.42607735212639	21.0839780176446	2.64041593569506e-05	0.000726306273009143
ENSG00000117791	19.6430323706083	0.474249861737773	0.800850375669087	21.0806713301962	2.64478506164983e-05	0.000726452210329799
ENSG00000104490	101.381278435089	0.831522049235973	0.445617233743196	21.0763840029893	2.6504606722519e-05	0.000726956061193728
ENSG00000170153	41.3340690359378	1.71960482456361	0.783834948517651	21.0156868284134	2.7321314370998e-05	0.000748271887801935
ENSG00000229417	45.6869471383115	2.57691071044438	0.54874694886713	21.0067692269808	2.74434066573983e-05	0.000750529582357317
ENSG00000184979	245.665075670403	-1.7996718986895	0.452712663103153	20.9958722492867	2.75933398362124e-05	0.000753541062626725
ENSG00000155324	495.690009125558	0.967312096602399	0.27514079573143	20.97743940054	2.78488272979797e-05	0.00075942227177848
ENSG00000054356	17.4902077516404	-5.16027828484625	1.20279144920437	20.9574019981939	2.81292387102646e-05	0.00076596524113922
ENSG00000162493	3658.78002919061	-0.257602522306457	0.274460075167027	20.9494467484617	2.82413490883242e-05	0.000767913119966288
ENSG00000189120	670.303523635705	-0.137460115969385	0.33348691621237	20.9446628064066	2.83089824333768e-05	0.000768647765497354
ENSG00000006747	32.0971142794001	2.88694268393067	0.910006824120523	20.9041683723055	2.88880025374168e-05	0.000783245627536695
ENSG00000237975	197.574591360628	2.50763157024364	0.525387463802283	20.8966327647576	2.8997052172204e-05	0.000785077557022834
ENSG00000086062	11361.437296166	-0.419309397540019	0.213980016969528	20.8862029739192	2.91486637423974e-05	0.000788054944749814
ENSG00000166348	1228.10611349255	0.651290434812737	0.264738276418951	20.8518888865449	2.96530834415257e-05	0.000800548650685983
ENSG00000005020	1225.74203738044	-1.13722475202132	0.266716150327595	20.8407775800726	2.98182841645609e-05	0.000802718389494047
ENSG00000065809	1630.50921797583	0.157946508561921	0.343574779820055	20.8416010013602	2.98060101864279e-05	0.000802718389494047
ENSG00000172602	187.463262066814	0.378477076044249	0.467548395710719	20.8349052976639	2.99059635138257e-05	0.000803935169743112
ENSG00000174502	645.971877950345	2.62734099308334	1.15830225171562	20.8272819439367	3.00201729094119e-05	0.000804719224236005
ENSG00000088340	227.305432252451	-1.68558481289978	0.567152246704072	20.8287735311266	2.99977924033928e-05	0.000804719224236005
ENSG00000251363	13.2970131016751	-1.55483039551897	0.906803030933081	20.8209113583829	3.01159484048603e-05	0.000806144729224868
ENSG00000204839	140.748968626857	1.58016186563839	0.467646239638526	20.7927069440681	3.05436584878208e-05	0.000816438893901143
ENSG00000137752	954.704664570929	-0.290193276428796	0.185487732588679	20.7192449150439	3.16864169109535e-05	0.000844599211323654
ENSG00000182782	916.107167934349	1.41496240508379	0.322535448368481	20.7211067476287	3.16569332347512e-05	0.000844599211323654
ENSG00000071967	552.420264536131	-0.258039795251024	0.443161023557323	20.7163167386607	3.17328425971449e-05	0.000844647040999953
ENSG00000112245	67.2767037945837	-0.717576881593015	0.498326358782324	20.7035865444734	3.19354694068826e-05	0.000847474308901062
ENSG00000054654	2859.4201186591	1.03803633011915	0.283352543613515	20.7028539986528	3.19471686466299e-05	0.000847474308901062
ENSG00000210196	2321.70384188871	-1.60376656576107	0.553023648276642	20.7012122982325	3.19734032525949e-05	0.000847474308901062
ENSG00000073060	594.11118180794	-1.2807668183647	0.297988464408299	20.6928351359131	3.21076073131621e-05	0.000849841214547683
ENSG00000205189	82.7474226786376	1.80649982391322	0.703566137104466	20.6783000267958	3.23418010782495e-05	0.000854844393024959
ENSG00000153132	25.8682902312142	3.84866481807591	1.18850552442305	20.6285020844274	3.31571876698972e-05	0.000875174026015068
ENSG00000125285	369.289289641245	2.03414651279676	0.61222344273047	20.6104745708715	3.3457409525693e-05	0.000881868349963426
ENSG00000174145	36.976736593627	-3.49192040861125	0.7508141767159	20.5999569971495	3.36338183529748e-05	0.000885285135368634
ENSG00000163331	354.878010205616	-0.100336504583416	0.403377114181232	20.5883066055809	3.38303136861108e-05	0.000889220397930066
ENSG00000162512	460.345883032615	-1.62793147583868	0.35203698873706	20.5799042768466	3.39727393618537e-05	0.000891725509602054
ENSG00000226476	51.847687271522	-3.89737295296367	1.5680758358025	20.5574380546839	3.43565103524945e-05	0.000900549803907146
ENSG00000110719	2036.88053061676	-0.454769723155165	0.360972697337526	20.5350073840344	3.47439989825069e-05	0.000909446999645842
ENSG00000170961	153.045542610559	-2.04149660687019	0.783247934028224	20.4890343557607	3.5551892157676e-05	0.000929308783265219
ENSG00000138670	233.383163873618	1.24885036943067	0.41138227313631	20.4824750437298	3.5668681544475e-05	0.000931075583764398
ENSG00000088386	283.445124699539	-0.879127242454816	0.373998799841646	20.4787139466099	3.57358213422271e-05	0.000931543276724034
ENSG00000055332	3885.42314787921	-0.968904389576447	0.252929065662765	20.4576978168092	3.61133155655071e-05	0.000940088716749961
ENSG00000173320	187.265536468136	1.02934808808102	0.277416232895305	20.4432437724942	3.637525266983e-05	0.000945203123661913
ENSG00000132613	594.62777674924	0.751650693054548	0.212253753118918	20.4413521083821	3.64096738256029e-05	0.000945203123661913
ENSG00000163364	29.2671718981766	-4.954067805592	1.05608178165676	20.3965226060661	3.7235002821244e-05	0.000962883475769
ENSG00000186918	1654.23767775998	0.968459775116386	0.219434227656581	20.4010772770924	3.71503027088813e-05	0.000962883475769
ENSG00000205744	533.748014672993	1.06623955703854	0.234838607449833	20.3960734382201	3.72433661433505e-05	0.000962883475769
ENSG00000188257	49.9314431379136	9.64434919547928	2.25600023943664	20.3817511016048	3.75110294036094e-05	0.000967161078287885
ENSG00000106560	39.0803514325088	-1.85213448909195	0.795680317911366	20.3818955313808	3.75083206466285e-05	0.000967161078287885
ENSG00000150782	1066.03761435969	-1.0306538531013	0.226147755559982	20.3708509809707	3.77160248878723e-05	0.000969804036688836
ENSG00000148735	10.7570628509707	-5.58629126684796	1.52371471017334	20.3725230296956	3.76845065490969e-05	0.000969804036688836
ENSG00000174226	66.1054068379333	3.75702539570628	0.820096185627232	20.3560687209099	3.79958216654858e-05	0.000974350846909646
ENSG00000159267	478.569261325788	-0.420997606550973	0.19565119271332	20.3574004690403	3.79705296548346e-05	0.000974350846909646
ENSG00000163687	15.9383037817905	2.00120669211558	0.770401821114575	20.3499306348797	3.81126116015691e-05	0.000976023240270225
ENSG00000184319	172.660070398251	0.0130970719386597	0.251123484060393	20.3380075236259	3.83405006674563e-05	0.000980532398826501
ENSG00000266028	861.168262426154	-0.853994462407685	0.214673685063713	20.3332129558505	3.84325239908966e-05	0.000981559401521887
ENSG00000083454	8.60554634513591	-7.02906977905236	1.69868196235555	20.326594581334	3.85599150738123e-05	0.000983485704544336
ENSG00000160223	75.289074277771	0.618441766799622	0.476359064444411	20.2569750064076	3.99258129076012e-05	0.00101695290615929
ENSG00000175183	537.485303409752	1.79770892731334	0.403438887453175	20.2385998156209	4.02943254019622e-05	0.00102495982289265
ENSG00000164362	298.714508620389	-1.31392479638752	0.485206736890349	20.2310465792457	4.04467894020755e-05	0.00102745703279769
ENSG00000188293	245.80929265461	-0.882970488837687	1.10753867517361	20.2236434019403	4.05967842170519e-05	0.00102988490791918
ENSG00000138166	1883.89626588653	0.891063847417081	0.356806899528462	20.1821388989388	4.14480613009072e-05	0.00105007303898215
ENSG00000013725	9.60846397167245	1.95004871400324	0.851502543945603	20.1657276977425	4.17895667499878e-05	0.00105730955981754
ENSG00000237515	7.42521535144744	5.9000413870303	1.80210544372847	20.1321473001136	4.24971454548948e-05	0.00107377633876353
ENSG00000157227	14113.8715197708	-0.0599871322432473	0.274974037653938	20.1106047726812	4.29573675529914e-05	0.00108395757458715
ENSG00000069869	557.645314910952	0.115560110005125	0.259674451997546	20.0893681860572	4.34159317576805e-05	0.00109406991812797
ENSG00000189058	22.4899796702045	-2.14936500418808	1.08914792243691	20.0517653397785	4.42399350053368e-05	0.00111335208773404
ENSG00000197119	415.980515990591	0.780674740913864	0.340806152229155	20.0415994456952	4.44653767208632e-05	0.00111753951453165
ENSG00000178573	2660.72632291554	0.494819261716212	0.306616185486605	20.0050083810258	4.52863819211377e-05	0.00113666416161476
ENSG00000253669	31.0978857443853	-2.22300713360129	0.506820121003448	20.0003348862852	4.53923284919807e-05	0.00113781432676919
ENSG00000054219	84.595744829277	-0.328925616604164	0.602392750653618	19.9821437228414	4.58070814757971e-05	0.00114669182133527
ENSG00000169562	39.1546706102595	-3.46214443877502	0.862169504292343	19.9742148467358	4.59890412585125e-05	0.00114972603146281
ENSG00000182378	503.331076055357	0.105020525578683	0.355063764226766	19.9664497956496	4.61679419544332e-05	0.00115267585948239
ENSG00000099260	481.600084273392	1.49838273929041	0.385598162757244	19.9165397623493	4.73345596544243e-05	0.00118024577267454
ENSG00000196878	37511.9760553416	-0.147197943566105	0.373355699534393	19.8763741709502	4.82947796235561e-05	0.00120260355838921
ENSG00000138795	14.2923966108045	4.05909244065427	0.95651812302382	19.8732520782235	4.83702288882349e-05	0.0012028995817475
ENSG00000165795	3843.29228798292	1.49784107706355	0.381982205545493	19.8618129896818	4.86476772364567e-05	0.00120821166889756
ENSG00000100304	2851.34628159876	0.460099769293964	0.154497932437341	19.8541883138265	4.8833492591888e-05	0.00121123702136498
ENSG00000077782	207.081156861977	-0.920236496263953	0.460622587619339	19.8508059735031	4.89161482101096e-05	0.00121169909015226
ENSG00000129595	880.286672372167	-0.912410429154988	0.296400393531501	19.8344022900514	4.93190005226917e-05	0.00121905771248822
ENSG00000257582	4.79786879854073	6.27242497769648	1.81244371890576	19.8334679880878	4.93420453244902e-05	0.00121905771248822
ENSG00000106991	70.7736549200852	-2.14061736822	0.553406907466143	19.827045675997	4.95007449999672e-05	0.00122138409273061
ENSG00000184221	7.14659906672435	5.01710233821413	1.67230510266547	19.8150715615754	4.9797997738921e-05	0.00122711862917849
ENSG00000128383	290.713534266981	1.71109186957753	0.518330952419965	19.7663607928211	5.10257374623981e-05	0.00125573742714679
ENSG00000211448	2646.51251588121	5.78407725534738	1.12786347673101	19.7357319927309	5.18131802354054e-05	0.00127346030643513
ENSG00000129682	8.38232393020325	2.24708235531613	1.13841696450077	19.7195828026499	5.22332443249608e-05	0.00128211951861204
ENSG00000149531	265.811371063843	0.97222983783135	0.23344136734948	19.7131701211221	5.24009906877603e-05	0.0012845709180905
ENSG00000178750	122.034259795538	1.54392607331314	0.344588608935516	19.7061091072976	5.25863197077817e-05	0.00128711644946719
ENSG00000102996	815.076876447197	0.730500523821441	0.309743808264413	19.7040361557015	5.26408524114982e-05	0.00128711644946719
ENSG00000136717	317.141656268957	0.713041543253918	0.462909320362274	19.6985795109726	5.27846697272046e-05	0.00128896758011271
ENSG00000197083	27.1933149496631	3.62357262910003	1.2309895734908	19.6949508057269	5.28805266640186e-05	0.00128964428752133
ENSG00000232680	4.59580628123048	6.21047176241905	1.80500472386351	19.6922602860276	5.2951712584413e-05	0.00128971835348779
ENSG00000171992	1554.33835754967	0.418482622915693	0.276188320189351	19.6862364233868	5.31114399291583e-05	0.00129194601627162
ENSG00000273179	19.154769025107	0.193210001872533	0.872389880813866	19.6790623716186	5.33022941337732e-05	0.00129492415466195
ENSG00000236345	22.8469445509427	-0.0667181691402341	0.506208218163362	19.6760905650491	5.33815550601633e-05	0.00129518708911999
ENSG00000106004	106.71461083411	-3.02482782792121	1.19162406833016	19.6727872919349	5.34697948379396e-05	0.00129566692356979
ENSG00000105141	2044.49255091445	-2.30713707135384	1.44814957944386	19.6684224830371	5.35866149841105e-05	0.00129683719766533
ENSG00000165443	7.21036039709062	6.82369122816507	1.82419733585356	19.6446679903813	5.4226871123424e-05	0.0013106558569742
ENSG00000134070	527.4752822883	1.13189970543254	0.397403467933061	19.6342406991618	5.45103290946094e-05	0.00131582650269832
ENSG00000170477	51018.0500445778	2.56147126555041	0.565683570535848	19.6123908040413	5.51091164862341e-05	0.00132858602484329
ENSG00000006118	6764.87142032502	0.139519285870372	0.267111351524826	19.6005862506077	5.54353475472808e-05	0.00133475057548637
ENSG00000185518	40.4137166806577	-1.16230430872611	0.61086763308573	19.5750135290338	5.61487148682693e-05	0.00135020893123507
ENSG00000158470	5816.61446626839	0.163974108160676	0.270439867774632	19.5668883621653	5.63772876908534e-05	0.00135398498673782
ENSG00000058091	770.301665886098	-0.566137820436943	0.301254993992408	19.5511253767643	5.6823380501685e-05	0.00136296891761013
ENSG00000146555	26.3643336073381	0.43199778849325	0.673972240174706	19.5477705290717	5.69187773833012e-05	0.00136352893921389
ENSG00000205622	35.0908103665313	-2.19532635255703	0.62920534176076	19.5415699477179	5.70955159670905e-05	0.00136603367847938
ENSG00000233429	179.556393043624	-2.28777487803475	0.500089893922207	19.5077638463625	5.80688069872789e-05	0.00138756587403315
ENSG00000088387	3166.90457303395	1.22094079960009	0.286350843706882	19.5044995497499	5.81636612793316e-05	0.0013880798104809
ENSG00000283703	13.0887429700813	-3.72239920381313	0.919431851738611	19.4916357135471	5.85389708715704e-05	0.00139527710799052
ENSG00000242207	4.41854315809551	-6.16709089473696	1.80150237565482	19.482206425017	5.88156129168593e-05	0.00140010751503341
ENSG00000105880	129.27217328293	0.65778065693514	0.464713130267279	19.4774928853366	5.89543912495746e-05	0.00140164805828919
ENSG00000162377	655.784563076588	-0.296135184755879	0.192390403999313	19.4720473706531	5.91151284761075e-05	0.00140370615609829
ENSG00000127418	380.502098328375	0.471964729542173	0.287075772628484	19.4695068532461	5.91902676955843e-05	0.00140372909290593
ENSG00000018236	513.93561695751	0.139445111656387	0.592091879691718	19.4660527481235	5.92925807235697e-05	0.00140439560725101
ENSG00000198853	340.668425823719	-0.00716107682429726	0.246881427554965	19.4502274715423	5.9763602523167e-05	0.00141378272218867
ENSG00000147041	924.709500286259	1.35755233983966	0.343711971638897	19.4457144325284	5.9898612527132e-05	0.00141520754316601
ENSG00000134533	36.9911646739744	-1.97926341865744	0.906269246908898	19.4128027640628	6.08924489422877e-05	0.00143689475839501
ENSG00000119042	110.230254890745	-1.89026749653145	0.445005521824817	19.4001620634427	6.12785293473186e-05	0.00144420444321047
ENSG00000121440	509.882527482126	7.36811171393053e-05	0.863722733689446	19.3963357180557	6.13958779746657e-05	0.00144517038640616
ENSG00000200033	10.1334959499715	-0.00749446222249525	0.852384473124073	19.3902935978567	6.15816390683207e-05	0.00144774226008443
ENSG00000224269	5.01305954011046	6.32612358759432	1.83910418184407	19.386017541351	6.17134432027771e-05	0.00144904083450689
ENSG00000179241	314.042019570388	-0.112484192896489	0.264512036744473	19.369026708269	6.22399579232633e-05	0.00145959256963787
ENSG00000090661	984.298495185807	1.54635772142036	0.348105891531084	19.3593613194626	6.25414725968894e-05	0.00146484822883185
ENSG00000108950	269.005346409732	1.90744832582317	0.635903422022079	19.3485674383625	6.28799176688848e-05	0.0014709548107338
ENSG00000151834	13.299945132856	-7.47502235684777	1.66379096817089	19.3001930354624	6.44193491248679e-05	0.00150325053290768
ENSG00000196597	73.9183592264759	-0.148605821342145	0.29964338356904	19.302492295733	6.43453332534086e-05	0.00150325053290768
ENSG00000132429	34.3013574113328	-1.02855042775703	0.837659646161819	19.2916909207389	6.4693782375664e-05	0.00150594075210263
ENSG00000110723	664.596010430304	1.64218933274615	0.365085679989419	19.2935854090687	6.46325305825866e-05	0.00150594075210263
ENSG00000158055	3157.27676028007	1.14688705783002	0.258178427966594	19.2818698467256	6.50122448590943e-05	0.0015114947591626
ENSG00000253910	38.2884530809274	-1.13835441043602	0.570001382581132	19.2271856490837	6.68143403514158e-05	0.00155148636950987
ENSG00000113269	439.306191258873	0.441507176081854	0.282817326678229	19.1878568648226	6.81412069963259e-05	0.00157666706486865
ENSG00000184497	27.8518570144056	-1.90569720759908	0.549058865495468	19.1876377085799	6.81486741908882e-05	0.00157666706486865
ENSG00000161544	91.5517947555953	0.394809792391856	0.514110701178098	19.1898574417292	6.80730802126708e-05	0.00157666706486865
ENSG00000285103	205.776660893678	-2.24001063343154	0.502164551889476	19.1758239418731	6.85524117013025e-05	0.00158407129602827
ENSG00000183032	25.1477212895884	1.36460194284804	0.635794384600874	19.162198326712	6.90210406181331e-05	0.00159295511426606
ENSG00000172638	297.826242034529	-1.04267174554316	0.499974929681377	19.142442578912	6.97062001424538e-05	0.00160680857210224
ENSG00000168795	760.464094059483	0.752364373503978	0.171157606087448	19.1355407527533	6.99471657167269e-05	0.00161040159512051
ENSG00000170989	44.3877990656748	-2.53831398269626	0.859242924926511	19.1330714763069	7.00335784944092e-05	0.00161043192345892
ENSG00000189325	5.38296973914874	-6.37660248969253	1.65996121165657	19.1256184543189	7.02950462733121e-05	0.00161448270718742
ENSG00000149591	430.809560130484	-0.159546173642748	0.45658461569077	19.1130680667991	7.07375482497895e-05	0.00162267648560881
ENSG00000102312	660.405557507239	0.224642060761848	0.472521220176761	19.1105508929251	7.08266336530738e-05	0.00162275307734192
ENSG00000120457	53.4499790518592	0.881807871962642	0.524582092502529	19.0825372010425	7.1825671752031e-05	0.00164365276651413
ENSG00000141968	159.0512146191	-1.33276364014114	0.431666410742523	19.0680406664211	7.23481747537984e-05	0.00165361015364207
ENSG00000160991	305.939752320891	0.123050326430016	0.412311324239701	19.0476990637856	7.30877684194292e-05	0.00166849941777768
ENSG00000156804	891.859839201502	1.31917067871341	0.316988438731216	19.0386264850661	7.3420068821189e-05	0.00167406602703735
ENSG00000083444	1664.26415991551	-0.201649544375654	0.219256347198178	19.0316230009254	7.36776176365718e-05	0.00167791686374503
ENSG00000020633	32.1703963862204	1.18556159070966	0.808988693161786	18.9838067006457	7.54603390504862e-05	0.00171439005585888
ENSG00000103942	957.07394507527	0.898687789832257	0.278359529444538	18.9860602561387	7.53753599049968e-05	0.00171439005585888
ENSG00000141485	380.586020292194	0.899418301897781	0.671492265287313	18.9667484675228	7.61067016104765e-05	0.00172700159230008
ENSG00000222041	125.092456858767	-0.724546228216997	0.306960478531167	18.9400981156092	7.71276236777932e-05	0.001748072189344
ENSG00000171310	565.460524707524	0.29710327471209	0.380579682996125	18.9229053780476	7.77934991290425e-05	0.00176058035248845
ENSG00000118922	154.861733537847	-0.952637209217075	0.460146612456087	18.9210535727407	7.786556169262e-05	0.00176058035248845
ENSG00000177551	192.134869869236	0.937532416682681	0.680733857268754	18.8735625499882	7.97366462872193e-05	0.00180034238504076
ENSG00000182010	546.924294502	-1.14331733591933	0.401669554365354	18.8716135801906	7.98143863169987e-05	0.00180034238504076
ENSG00000181788	1252.65205232331	1.01676345635015	0.236495757877737	18.8575166739285	8.03789415614371e-05	0.00180972188501193
ENSG00000156127	11.8011079592875	-1.81264766517488	0.897450698152153	18.8564590370655	8.04214586681654e-05	0.00180972188501193
ENSG00000160360	480.99879774747	-0.705484974506686	0.386342047462393	18.8517484952033	8.06110962282535e-05	0.00181183491225617
ENSG00000105146	40.082924827135	2.61923090596271	0.588139354613829	18.8472239951413	8.07936651135677e-05	0.00181378423757327
ENSG00000106123	28.7789078228395	1.10394902522176	0.812605752526736	18.8144954985654	8.2126669772356e-05	0.00184152514862777
ENSG00000214290	59.2941921799887	1.19338283900554	0.375334490174023	18.8107031694445	8.22825431871664e-05	0.00184283684002027
ENSG00000063660	4823.65782185437	-0.0376738253341448	0.193735423073745	18.7929701126536	8.3015347607586e-05	0.00185705136344393
ENSG00000023909	749.94453405789	0.669273431269064	0.340957824272132	18.774624835234	8.37803204447352e-05	0.00187195107959459
ENSG00000136542	6315.25076043599	-0.402320859845369	0.388627069543209	18.7649774548649	8.41854270229334e-05	0.00187878444152007
ENSG00000116717	2705.29217347119	0.162801612096283	0.222874697102257	18.7330102792136	8.55418233523237e-05	0.00190680683974408
ENSG00000061656	63.0070083415724	-2.11059009249507	0.575722813050792	18.7180993892225	8.61819589940951e-05	0.00191881596936853
ENSG00000123384	5373.8568191331	-0.44856073388923	0.357111861031523	18.7086243773192	8.65912151991644e-05	0.00192366252259259
ENSG00000142173	1681.4596329185	-1.15908552420184	0.46454347213924	18.7083537953159	8.66029310039043e-05	0.00192366252259259
ENSG00000271122	198.396335611635	0.42054534234166	0.240583319946957	18.6330060808816	8.99278351948588e-05	0.00199517500710751
ENSG00000138439	369.928762367801	1.00549399028064	0.280757011495405	18.624105453913	9.03289340983799e-05	0.00199938605592028
ENSG00000182534	1765.29720081535	-0.237144362532047	0.291451962840346	18.6259147396306	9.0247255623699e-05	0.00199938605592028
ENSG00000142871	479.302277505193	0.0577417141620089	0.333094097262213	18.5875402822611	9.19955693668798e-05	0.0020316095695834
ENSG00000128510	446.390872051077	-2.13564484753209	0.647498365287771	18.5874561367765	9.1999439954186e-05	0.0020316095695834
ENSG00000126003	1188.06444001775	0.340474010509004	0.188315300418632	18.5701782102446	9.27976626804587e-05	0.00204684821238657
ENSG00000203760	209.94745896244	1.65020915882209	0.522235361792793	18.5550552960698	9.35020078064038e-05	0.00205758778806534
ENSG00000100379	130.74066664058	-1.32233072824024	0.357288306122326	18.5555173887837	9.34804070036246e-05	0.00205758778806534
ENSG00000275216	343.95327865559	-2.07605196065302	0.506952669147276	18.5432684852748	9.40546800049223e-05	0.0020673458990629
ENSG00000221968	245.46783824405	-1.59372379312834	0.488299818567528	18.5333490862741	9.45223216768194e-05	0.00207521454493481
ENSG00000130589	4088.0581687061	-1.14600536780738	0.283692290950274	18.5260969462229	9.48656883938567e-05	0.00208033969044466
ENSG00000132329	31.2987528560973	0.584326923403871	0.5311151031882	18.5208448549453	9.51151374100327e-05	0.00208339580495934
ENSG00000182938	8.9743812497957	2.60066352789634	1.11301433676701	18.4889170231763	9.66457320999938e-05	0.0021144745433438
ENSG00000126705	1975.70024862448	-0.375876049724964	0.20115159464259	18.4795976216644	9.70971231477776e-05	0.00212189729280796
ENSG00000163293	1681.82335553826	0.217870084022022	0.244200448522202	18.4770479925604	9.72209829056594e-05	0.00212215351959585
ENSG00000180861	152.355918564588	-1.70364068667818	0.778987159903632	18.4623194093106	9.79395893418484e-05	0.00213537641508581
ENSG00000118515	3301.15417527815	-0.259085236854561	0.297482918669646	18.4583977890884	9.81318186799333e-05	0.00213710548736218
ENSG00000169299	3501.1881941816	0.353217772886431	0.164068816194788	18.4369857044328	9.91880661104279e-05	0.00215514827915023
ENSG00000139531	417.956615061529	0.827977355583984	0.242084054688912	18.4370187149125	9.91864290011192e-05	0.00215514827915023
ENSG00000167642	5276.40746489808	0.359704085202757	0.129882946137107	18.431819810947	9.94445947600197e-05	0.00215824421540524
ENSG00000124249	47.8109895034131	-2.88451232343877	0.648419226225205	18.4282572678821	9.9621890444721e-05	0.0021596154371894
ENSG00000112297	8450.29044667094	1.01961297105069	0.240750887984433	18.4198981374928	0.000100039137979888	0.00216617927490776
ENSG00000278518	8.04244161386723	4.48747733282782	1.31018088501334	18.4153852256976	0.000100265126753736	0.00216859145578795
ENSG00000106366	21774.6469068582	-0.795236582055756	0.407122300852175	18.4013339195299	0.000100972035089346	0.00218138785852269
ENSG00000254285	13.6309952108731	1.98719976407296	1.02986377637729	18.3982389934882	0.000101128406538097	0.00218227490733578
ENSG00000163083	18.8806089548868	1.47189922202186	0.754418711036488	18.3797995825758	0.000102065092006622	0.00219747652585361
ENSG00000196937	7260.35624550058	-1.12026243924415	0.258966567646995	18.3809439039577	0.000102006711076287	0.00219747652585361
ENSG00000142185	7.27218190796319	2.04334879816188	1.74650911050512	18.3716849261961	0.000102480044812234	0.00220390323644492
ENSG00000103313	11.8521637223054	2.99774995311092	1.73906192529693	18.3618813677996	0.00010298361254476	0.00221221891873959
ENSG00000213853	2306.6399604466	1.06962405384553	0.352712965699926	18.3456240948921	0.000103824140436527	0.00222774587047763
ENSG00000127948	2111.7388346355	0.78611080647031	0.190924286295466	18.3350529770684	0.000104374361880241	0.00223701562693495
ENSG00000173110	250.20420776799	1.65898815173417	0.576252105669659	18.3144169575733	0.000105456872638014	0.00225765985822899
ENSG00000186442	19.5006823123295	2.42427771887038	0.698963066204441	18.3083494149927	0.000105777290462028	0.00226196070281795
ENSG00000140853	225.381110373047	-2.02530895387809	0.533764288988971	18.2857127369854	0.000106981314617736	0.00228512571009103
ENSG00000135002	721.903365686777	0.924126055580748	0.27991992502737	18.2748923719284	0.000107561671559861	0.00229493194393503
ENSG00000189182	11.9914708873557	-3.5831709895939	1.89481390460577	18.2647062415607	0.00010811088757369	0.00230405241816675
ENSG00000033178	3192.27798342485	-0.92178955535402	0.214610645071013	18.25875705748	0.000108432952127193	0.00230831678178529
ENSG00000183580	26.0784980914331	1.76667187983427	0.642341660296974	18.2500626482279	0.000108905358437779	0.00231576843644378
ENSG00000051596	844.53089773962	0.982372859989659	0.26268228971944	18.2473129393978	0.000109055190425633	0.00231635182806409
ENSG00000198208	17.9387504500616	-2.3078494839089	0.733260000081475	18.2286545212968	0.00011007734965015	0.00233544152705054
ENSG00000181444	172.432075154312	1.27455647397026	0.313706421835828	18.2239940702589	0.000110334153788936	0.00233826860073417
ENSG00000115652	998.335743812116	0.262363552379236	0.236490925661941	18.1840030756902	0.000112562544707923	0.00238282568075776
ENSG00000132164	1055.48055635855	-1.73900240793394	0.450793282419411	18.1746660711095	0.000113089271762264	0.00239130108167693
ENSG00000172243	296.074057592303	1.27979461773594	0.472834837611801	18.1625256506929	0.000113777835162138	0.00240317581522709
ENSG00000068078	9958.38075825855	0.289255198226295	0.272093454509345	18.1576915422712	0.000114053174979302	0.00240630583777402
ENSG00000184012	1258.10940891383	1.00118468818819	0.411125049519682	18.1378993600501	0.000115187458821535	0.00242753079977455
ENSG00000145819	322.075936015263	-0.886669615867011	0.321076296745467	18.1272453044851	0.000115802702871036	0.00243778214887024
ENSG00000186187	979.717406638042	0.655957919406519	0.246299154028886	18.1013636957102	0.000117311021374698	0.00246405225251515
ENSG00000167363	137.993705769745	0.0178982098607122	0.319349475399142	18.1017813156615	0.00011728652822048	0.00246405225251515
ENSG00000131188	142.477609894278	-0.686167344141505	0.282371090519479	18.0733791071278	0.000118964009287041	0.0024960020795535
ENSG00000117984	9989.88682583438	-0.634268336021896	0.262105417849957	18.0474064883277	0.000120518987580612	0.00252303300880873
ENSG00000149090	37.3958230179856	-1.0796513741584	0.501036411730559	18.0495423969588	0.000120390347510804	0.00252303300880873
ENSG00000116661	336.899261224871	-0.256958365128513	0.359481260101839	18.0411338271787	0.000120897568333035	0.00252816185713003
ENSG00000280237	18.0652760739131	-1.84064673870234	0.880861975149276	18.0358858489861	0.000121215218807538	0.00253200664010227
ENSG00000101004	154.09495902346	0.014132084697647	0.327501159488169	18.0277755901785	0.000121707760190089	0.00253949212965539
ENSG00000123989	3086.81453808289	-0.178502397443358	0.242019855240305	18.0106404642616	0.000122754978737714	0.00255852199626789
ENSG00000103089	98.7203155526227	0.893194896289725	0.512977687197597	17.9718982219569	0.000125156061049636	0.00260569687058786
ENSG00000187957	111.61433044947	-2.16462368959508	0.501453376987025	17.9633805907394	0.000125690214258627	0.00261394209323574
ENSG00000232537	6.31715521137908	2.00565936244393	1.11710811314537	17.9336798757865	0.000127570687160314	0.00265013749122825
ENSG00000269994	22.5876822628433	-1.35163479747829	1.07255507430602	17.9291060050555	0.000127862766932861	0.00265329261425921
ENSG00000232316	7.83544552759174	-2.79614031909821	1.66033118892987	17.9235641646247	0.000128217555777339	0.00265483286989732
ENSG00000092377	18.2540608722945	6.90982815623433	1.67416099729644	17.9256830549878	0.00012808178823751	0.00265483286989732
ENSG00000117983	11.5267855401917	0.097288427269965	1.09867657343731	17.9063052182117	0.000129328793541835	0.00267199499757557
ENSG00000166006	5.86130779513337	6.51701439911707	1.82805646851971	17.9070142310269	0.000129282953781562	0.00267199499757557
ENSG00000285756	640.493117703978	-0.914765301579489	0.293977746799507	17.8784980731486	0.000131139484168972	0.00270501156031667
ENSG00000133321	1343.99635315754	0.0642435317506301	0.365599413779544	17.8773815613869	0.00013121271399581	0.00270501156031667
ENSG00000176171	1670.06239376281	-0.645751020078766	0.199483061320305	17.8737740323426	0.000131449604417213	0.00270694642393445
ENSG00000143631	341.573780619053	1.00110254955795	0.311061335398965	17.8687621085643	0.000131779425202781	0.0027107887195246
ENSG00000173482	996.596185215827	-1.16150232345127	0.335849706116653	17.8644895815836	0.000132061241687578	0.0027136362637757
ENSG00000176907	42.0757104339976	-3.52331244113837	0.973958632606773	17.8525873845105	0.000132849494307865	0.00272687275463811
ENSG00000131724	4786.90868724859	0.884348152822007	0.245078027289661	17.8325248571721	0.000134188849092914	0.00275138024819436
ENSG00000198113	1730.41241016014	0.152528978861794	0.186890394565569	17.8120494443471	0.00013556969140228	0.00277668442617765
ENSG00000116525	347.863825352936	0.053446642798647	0.277910233107237	17.7625007567725	0.000138970291431446	0.00284325704361093
ENSG00000260877	18.3674059460964	-2.19110209914981	0.8509984827788	17.7299226132809	0.000141252525755823	0.00288682942756906
ENSG00000230105	4.79786676403952	-2.35678373170165	1.85924364103047	17.6486083822323	0.000147113789688621	0.00300337483263986
ENSG00000176788	2672.30407866521	0.743816814278364	0.200794749497063	17.6443015079874	0.000147430931334295	0.00300660600808355
ENSG00000135678	902.178941222765	1.29961162274478	0.359213448283368	17.5870040923561	0.000151715720792519	0.00309065663724265
ENSG00000090447	164.473139797363	-0.159747739996028	0.348981653036469	17.575150143799	0.000152617606052483	0.00310568623069165
ENSG00000130159	444.386016626286	0.49229290842262	0.191812674597595	17.5450745665293	0.000154929980276083	0.00314935539927483
ENSG00000187260	18.6180285520917	-2.41942759013633	0.764415510647852	17.5164479072607	0.000157163490506359	0.00319132946119404
ENSG00000119411	520.7721790451	1.33454352451066	0.318680976634246	17.5099456540186	0.000157675280410299	0.0031982901197909
ENSG00000148600	404.003632099721	-0.971109839266047	0.34496879459988	17.5035189691201	0.000158182759998219	0.00320514853636647
ENSG00000250451	7.60342550107445	-5.27801923723385	1.56053982849957	17.4991717085729	0.000158526964785566	0.00320868749579341
ENSG00000151376	80.5100521807511	-1.40806223923328	0.504596332721973	17.4823267500021	0.00015986779348732	0.00323236964930292
ENSG00000281386	16.9008688088831	3.03517665399587	0.735132691663302	17.4671811388413	0.00016108303679905	0.0032534647507172
ENSG00000186191	8.59389852155495	3.66401877176203	1.46112131412913	17.4588268065753	0.000161757314709952	0.00326360040606166
ENSG00000285820	62.1287798455642	0.341579505246256	0.496286477440959	17.4529060354894	0.000162236888236916	0.00326979031936489
ENSG00000182195	222.681425511842	1.80909645291243	0.51575780852076	17.4039659244219	0.000166255804922481	0.00334722458314676
ENSG00000006210	49.9043714858271	-0.0318255643379739	0.768132810003336	17.39076778973	0.000167356566180019	0.00336580554193078
ENSG00000163376	74.7509581624272	-1.00914331508271	0.318510090727258	17.3802749079886	0.000168236899798673	0.00337991860795105
ENSG00000181274	373.096192516736	0.881874228875088	0.236026598042937	17.3577205381508	0.000170144876510463	0.00341462543792207
ENSG00000111860	92.6662683749594	-0.911777308374576	0.427061059067274	17.3466769228216	0.000171086982463847	0.0034298274233461
ENSG00000181885	7238.88570902906	0.204860861854309	0.232511454408767	17.3445989675505	0.00017126483038637	0.0034298274233461
ENSG00000196371	57.8121762232243	1.36622116645817	0.595847141793399	17.3362192274965	0.000171983913145577	0.00344058726879497
ENSG00000116141	504.495378113987	0.850606602379942	0.223552950071263	17.3138628669414	0.000173917165322012	0.00347558854669385
ENSG00000134317	3462.40044399029	0.292430847434839	0.275131270824481	17.2912627394311	0.000175893586188198	0.00351137776224858
ENSG00000130826	1477.58372482201	-0.00835651015993455	0.166456133180513	17.2792081959029	0.00017695694599384	0.00352888324861267
ENSG00000151491	246.116797465488	0.213128714793764	0.402952272732475	17.2548054548265	0.00017912928909248	0.00356844399586862
ENSG00000091317	4147.56410045715	0.590611977324902	0.245726315083482	17.2499803223759	0.000179561972093636	0.00357330212604844
ENSG00000203867	96.7847020628525	2.48061354227218	0.680008193348133	17.2316770059029	0.000181212804298771	0.00360236588377546
ENSG00000130479	448.818011262543	0.2498132977536	0.243097901367675	17.2281700086334	0.000181530839459335	0.00360490150762636
ENSG00000100994	9797.55523359941	-1.49154078019007	0.35929354617487	17.2125527332804	0.000182953896850679	0.00362935272316467
ENSG00000166897	169.662607725279	1.18680123433023	0.674914482516801	17.2069764490802	0.000183464710091909	0.00363567501412501
ENSG00000174792	14.8475119979284	2.12497949393982	0.835062963692527	17.2044025998251	0.000183700967335633	0.00363654896111595
ENSG00000103381	869.946849176721	1.34676467456281	0.577128454935828	17.200316489126	0.000184076662231725	0.00364017850860543
ENSG00000184828	644.090294425989	1.17832243106825	0.282978168642634	17.1724528585801	0.000186659131759863	0.00368739464358601
ENSG00000186197	80.1698277627601	1.97559204769083	0.494944016036048	17.1653227341041	0.000187325770780621	0.00369670512202634
ENSG00000088543	27.081569186234	-0.525373139682041	0.521147987883247	17.1557798250266	0.000188221722977592	0.00371051677849056
ENSG00000174028	595.049493918513	-0.97883857201256	0.238195512984311	17.1463479048562	0.000189111465456325	0.00372417740245677
ENSG00000147459	978.784057801464	-0.822849052592741	0.296071330754952	17.1326496301685	0.000190411161674678	0.00374587446433812
ENSG00000230836	13.0307034143169	3.16674346831983	1.22752184752063	17.1181155209051	0.000191799930004979	0.00376927692143742
ENSG00000187634	22.9691081835747	1.0416611602537	0.799922051728719	17.1031446187622	0.000193241025893977	0.00379365810689162
ENSG00000140044	555.024761463725	0.839831695082063	0.249323377073218	17.0806261688819	0.000195429064768324	0.00383263735828034
ENSG00000106266	538.215576261587	0.522692752586502	0.193859258811358	17.0767816325576	0.000195805093135379	0.00383603663311288
ENSG00000131016	67.304114843975	-2.09175878604531	0.531565192205835	17.0523048868828	0.000198216152496818	0.00387925613857526
ENSG00000140459	7.04827487339932	3.21048726564993	1.37689749430777	17.0476986936057	0.000198673189549567	0.003884184000233
ENSG00000144741	75.6999724653139	0.341949546909526	0.580707132059418	17.023644403067	0.00020107708790138	0.00392712475596864
ENSG00000178726	3365.14250015429	0.42987758273471	0.352020698656771	17.0078013992576	0.000202676245940633	0.00395427624167678
ENSG00000126561	238.142267383173	0.637455670139972	0.264195852547538	16.9903425210044	0.000204453240691372	0.00398483787856253
ENSG00000159200	1022.15212141547	0.379701722557328	0.240142218428569	16.9747372320706	0.000206054756542804	0.00401192002836683
ENSG00000167797	528.396761222455	0.360538991616596	0.210582551743713	16.9674688882482	0.000206804957304798	0.00402238830112365
ENSG00000213694	92.889377787714	-1.62586795174949	0.489212019787084	16.9628442970313	0.00020728370478892	0.00402756069109889
ENSG00000135111	631.527687725201	-1.35851689268788	0.345267008179513	16.9197449391484	0.000211799079778186	0.00411107444595094
ENSG00000157765	1736.04251488723	6.30837400230901	1.93182217100227	16.8975995027997	0.000214157303175549	0.00414833875393784
ENSG00000176728	19.4956057281834	7.34045691292114	1.71204646068287	16.89785502222	0.000214129944248297	0.00414833875393784
ENSG00000111725	1081.4603478676	0.122532328209548	0.182088434022089	16.8915965107797	0.000214801061101672	0.00415655427540813
ENSG00000148965	23.1403703991867	0.780265259332414	0.69743785742039	16.8882338756163	0.000215162513675409	0.00415929578274476
ENSG00000142973	1473.6825427985	-0.636652274116421	0.538593290965417	16.8823273849708	0.000215798880573814	0.00416734062740758
ENSG00000180233	638.384526562262	1.07080565184507	0.259325602010456	16.8448206276293	0.000219884024095255	0.00424190128032895
ENSG00000148660	2834.92522133434	-0.450084415386247	0.194813185953811	16.8409463345419	0.000220310384500518	0.0042457983978333
ENSG00000124406	43.4924877165531	0.551253572377715	0.596994106835698	16.838134057757	0.000220620389294159	0.00424744747445775
ENSG00000124496	980.701119138226	-0.911159501128222	0.258556295456317	16.8267586997049	0.000221878782531098	0.00426733329207421
ENSG00000092964	128.781768388845	-1.21378161314081	0.331674229822883	16.7992340999888	0.000224953453612483	0.00432207523818909
ENSG00000197576	14.0481050127857	-3.44583415236126	0.927619551485295	16.7954319140147	0.000225381517811562	0.00432590793568337
ENSG00000133424	175.317571789809	1.05462687271906	0.548276273337044	16.7574730404727	0.000229699983469151	0.00440432845709593
ENSG00000154274	231.161822214936	1.51418181942531	0.434032436395036	16.7332730539886	0.000232496234912131	0.00445343243493125
ENSG00000114374	705.092301502412	6.37260457601761	1.34612921743618	16.7299679054528	0.000232880769856092	0.00445628773460721
ENSG00000180257	194.089266276196	-0.288195719387222	0.265616229839064	16.7182236240791	0.00023425230147216	0.00447800485389961
ENSG00000253293	146.370210787797	-4.89731546420379	1.09050885136428	16.7066466685448	0.000235612197778792	0.00449945594648198
ENSG00000258498	32.4667554576019	0.229155457119855	0.941401915896079	16.7045497406302	0.000235859358222825	0.00449963543786992
ENSG00000108771	634.800533010068	-1.13125012559449	0.281092256624374	16.6945000021459	0.000237047503294266	0.00451774823750654
ENSG00000171509	68.6421929353431	-10.116434031067	2.42942549988383	16.6825113361239	0.000238472712289553	0.00454033810873218
ENSG00000168542	810.579085246706	-0.411464482047999	0.368145761639038	16.6498773299172	0.000242395791684196	0.00459834255894138
ENSG00000250722	452.977286698986	0.962937180409657	0.644597815335931	16.6500549493225	0.000242374265541891	0.00459834255894138
ENSG00000136826	2764.05662403789	0.917478304281333	0.225144872935695	16.6490903113666	0.00024249119544642	0.00459834255894138
ENSG00000183734	23.1265826842242	2.48004370199934	0.872435728202339	16.6520110025264	0.000242137332944648	0.00459834255894138
ENSG00000214772	9.29404093539472	5.10349172527352	1.40191875112336	16.6337379118719	0.000244359768895849	0.00462913776411806
ENSG00000141401	846.129205538609	-0.279216960861291	0.423712506996238	16.6295961804168	0.000244866329494904	0.00463409528569107
ENSG00000075223	3634.91761376906	-1.01462537535806	0.378443112519827	16.6180069713459	0.000246289351982869	0.0046545269890468
ENSG00000136802	6269.02843660644	0.349189563460471	0.295892333993026	16.6168015672015	0.000246437835826943	0.0046545269890468
ENSG00000164318	9.2858441123494	6.1796400724821	1.78914197600206	16.5944850559994	0.000249203050987053	0.00469832348561683
ENSG00000155846	213.618519726001	0.0863013179836923	0.283690466811666	16.5940826342849	0.000249253198391508	0.00469832348561683
ENSG00000260597	6.51725066840496	-3.99316506184402	1.69902532278554	16.5812205439823	0.000250861322381016	0.00472393087170221
ENSG00000107331	532.314879079667	-0.0340876461719349	0.434989193102878	16.5759981847697	0.000251517222313616	0.00473157398835505
ENSG00000196549	243.056367656955	-2.16277774223334	0.55323058101566	16.5652822477387	0.000252868460384808	0.00475226972470953
ENSG00000130413	15.5752616683991	2.55881419202984	0.868179364899249	16.5604672528674	0.000253477973961532	0.00475899866787896
ENSG00000180346	252.678832999191	1.03658983732365	0.271639606256525	16.5475670239524	0.000255118220107001	0.00478273279471646
ENSG00000166710	6432.47214478691	-1.00697129564978	0.275152513905271	16.5465532998794	0.000255247562624234	0.00478273279471646
ENSG00000185507	39.5428472827891	-1.68988954532977	0.628365351047238	16.5325790461702	0.00025703725484585	0.00481150350935482
ENSG00000133106	455.891364300294	-2.04351696798299	0.494336405920587	16.529944311123	0.000257376090514298	0.00481308548713744
ENSG00000130517	567.879603399983	-0.0620208673165169	0.253161680893597	16.5144583824677	0.000259376679651915	0.00484570943969643
ENSG00000110328	580.338986867771	0.302386426592353	0.234943105387655	16.5021138597383	0.00026098257120355	0.00487090252468163
ENSG00000232063	9.18935000318288	-1.13297386176647	1.4481000037276	16.4857350380341	0.000263128640230771	0.0049061177501156
ENSG00000092068	848.195238941121	-0.156617450973197	0.368252944775533	16.4784064284644	0.000264094592457063	0.0049192816557578
ENSG00000048540	9.13224406897387	-4.77678235557458	1.71716246823209	16.4760438294509	0.00026440675160929	0.00492025346529579
ENSG00000138193	60.5569036085295	-1.61127940163687	0.398534544344981	16.4554950917972	0.000267137367753443	0.00496618338382506
ENSG00000286156	207.59605235942	0.337213482473787	0.486561744628788	16.4412148294437	0.000269051589365642	0.00499686097030891
ENSG00000143641	4504.16607834422	0.176633038760884	0.236004624477926	16.4359105317527	0.000269766101304951	0.00499691877311304
ENSG00000186106	407.765700207796	0.760382995555139	0.192041093049472	16.4342403402365	0.000269991475923424	0.00499691877311304
ENSG00000182175	648.349035581387	1.20632990774969	0.400391206494532	16.4333562284734	0.000270110853627194	0.00499691877311304
ENSG00000197183	263.81552480648	-0.293552720530153	0.437316686155437	16.4338814353194	0.000270039930905123	0.00499691877311304
ENSG00000122729	761.136710695065	0.570972650638444	0.306886766030101	16.4276361814811	0.000270884482786573	0.00500145252364477
ENSG00000166670	4652.51471129883	0.515382481498059	0.604413292719754	16.4288484966964	0.000270720333851628	0.00500145252364477
ENSG00000268879	25.1731784141161	-3.59054486556897	1.010847853018	16.4186738970728	0.000272101078508227	0.00501901843154795
ENSG00000197568	97.8119599947846	-1.2609023457942	0.319706612191873	16.4098751033819	0.000273300796216794	0.00503623911236887
ENSG00000206190	26.4350323675299	1.23291896584206	0.838337381843542	16.3772594371906	0.000277794279892625	0.00511406298343183
ENSG00000087085	445.412600179866	-2.25108534017566	0.541945397611149	16.3631001138181	0.000279767947618923	0.00514039651328943
ENSG00000245648	161.326225326838	-1.26197083646534	0.416691569569963	16.3649491942426	0.000279509410433676	0.00514039651328943
ENSG00000109452	1879.16766377577	-0.65784013777018	0.293041004031375	16.3359923936663	0.000283585697412456	0.00520548915958363
ENSG00000103196	233.217289412709	-1.80704985058571	0.470531282957464	16.3263077386782	0.000284962242382949	0.00522568840804004
ENSG00000175772	64.6311051216146	-1.72666766758334	0.422450483466056	16.3148342802343	0.000286601691648032	0.00525066506722072
ENSG00000253508	4.11929531663417	-5.031633610501	1.66594363653113	16.2986229317788	0.000288934232229668	0.00528801689276487
ENSG00000010278	9306.16657240759	1.03398542776414	0.313469624347737	16.2967887089939	0.000289199338653191	0.00528801689276487
ENSG00000179059	18.538369785179	3.48685393191777	1.25474099229623	16.2806735688159	0.000291538995911863	0.00532565202474132
ENSG00000143546	79784.1386273795	1.29116173268198	0.349266805836411	16.2683173870442	0.000293345725648908	0.00535348877329371
ENSG00000163513	4885.50219132602	-0.804887721713341	0.227962540519272	16.2605876918828	0.000294481655851598	0.0053690417504735
ENSG00000172183	392.180417843974	-0.12296355188327	0.262056241321943	16.2583569624783	0.000294810293537356	0.00536986025524011
ENSG00000025039	527.802414156926	1.35049249346896	0.33369868562917	16.2498980386892	0.000296059822995947	0.00538743475980605
ENSG00000118557	81.5307695636605	-0.477487047309297	0.604890352869798	16.2427093364374	0.000297125880699189	0.00540164005017498
ENSG00000173598	1809.3805473827	-0.892858130402915	0.264058463183465	16.2362571881609	0.000298085978659623	0.00541389361433145
ENSG00000168811	13.0719588801078	1.14896693695314	0.699714830455085	16.1920112456879	0.000304754012596208	0.00552439625324066
ENSG00000131435	591.493585199127	0.102870933347421	0.270676794876052	16.1937112563252	0.000304495080127195	0.00552439625324066
ENSG00000130821	2865.06508745362	-0.736527060724006	0.361336518857745	16.1858700961003	0.00030569122073307	0.00553608263385009
ENSG00000257335	9.21265626300544	-2.10548915043873	0.920205145765428	16.1797021537454	0.000306635418838533	0.00554787313720769
ENSG00000138162	3762.17399672022	1.10427141695932	0.299952832132224	16.1721964704673	0.000307788335009145	0.00556341379183197
ENSG00000133131	541.383065999222	0.595460633386958	0.239385113720423	16.169413336915	0.000308216941178116	0.00556584504942351
ENSG00000205413	13156.4464654321	-1.0698154365513	0.274526939297743	16.1670454484143	0.000308582068956304	0.00556712645853008
ENSG00000284070	6.02418658871263	-4.57197838077884	1.60117525852351	16.1587528742345	0.000309864194999484	0.00558493322891927
ENSG00000075643	527.200128090473	1.61897712303678	0.396042104788206	16.1513649904636	0.000311010932014182	0.00560026820967497
ENSG00000137959	2550.89179718993	-4.80388191446669	1.1082569902025	16.1452009771873	0.000311970948399713	0.00560156565319218
ENSG00000140332	2393.7792874822	0.762612418929411	0.195922001335879	16.1458676341907	0.00031186697692021	0.00560156565319218
ENSG00000182054	2945.01606874669	0.530807950484496	0.252192151282332	16.1457472337354	0.000311885751948333	0.00560156565319218
ENSG00000166912	70.5158496629414	-1.14698775223249	0.319804424100956	16.1396942866445	0.000312831095733213	0.00561168576943228
ENSG00000231131	11.7272671466218	-6.1743282507404	1.5704850763318	16.1369967503445	0.000313253317026773	0.00561393847038986
ENSG00000163393	519.302138325651	0.00647407768457987	0.201487398902145	16.1291404550105	0.000314486242284107	0.00563070211468942
ENSG00000163430	1381.07090561618	-0.335549494829138	0.373722824294074	16.1250559733651	0.000315129155194316	0.00563155737682005
ENSG00000168952	13.5964493919534	0.693392268253127	1.34173968477274	16.1261787772422	0.000314952290726362	0.00563155737682005
ENSG00000183067	5.8271778540641	4.40510252027912	1.66762642835309	16.1223744724725	0.000315551948116344	0.00563379303594511
ENSG00000164733	12185.3492707605	0.919236662631565	0.235807127511504	16.1034265491774	0.000318555681330362	0.00568206057415372
ENSG00000151692	126.380200265015	-1.17881808754157	0.547702696628683	16.0982166768368	0.000319386580296454	0.00568868040698187
ENSG00000106397	934.830612439748	-0.408176193422544	0.274129357659155	16.0973313442367	0.000319527993269312	0.00568868040698187
ENSG00000157500	1132.31286483329	0.161899629466323	0.165641139008151	16.0789481951725	0.000322478497752711	0.00573581350561096
ENSG00000142686	219.97676821432	-1.14955560853405	0.292477511765781	16.0592016628123	0.000325678183480378	0.00578728603039076
ENSG00000150281	65.1101819199373	0.0986926208470636	0.344029327637981	16.0442807750412	0.000328116973208388	0.00582515358158419
ENSG00000167552	1505.35243603859	-1.20735033465935	0.419180782211405	16.0316297689593	0.000330199056289284	0.0058566233742031
ENSG00000154262	32.01903613252	-1.12126825842487	0.708326187837798	16.0065512438635	0.000334365576904346	0.00592497054580032
ENSG00000117586	19.0287789261771	1.73681843251279	0.696143563679414	15.9996221323833	0.000335526014122069	0.00593997176544449
ENSG00000159842	47.1670192062154	2.38270229991069	0.703240952379696	15.9975406972083	0.000335875383712032	0.0059405996605142
ENSG00000118418	509.714498933144	0.830944602024973	0.207493469953074	15.9935757744764	0.000336541904141229	0.00594683056570753
ENSG00000173212	216.92599932412	0.856634741002267	0.33679248673611	15.9900776764844	0.000337131047490873	0.00595168383746713
ENSG00000053254	914.52397707715	0.876264384322462	0.290527867538841	15.987632836421	0.00033754341522858	0.0059534101893764
ENSG00000127124	36.6481524722923	1.5499605364839	0.540179467570829	15.9786854279496	0.000339056867479698	0.00597453558384849
ENSG00000221866	13.4784842781473	-0.502006025709257	0.66897478398201	15.9705619769099	0.000340436824016209	0.00599152243208544
ENSG00000105137	436.721493580843	-1.15463785681026	0.455957040302439	15.9692861488955	0.000340654062717249	0.00599152243208544
ENSG00000126709	9483.56956452501	-3.87007179038149	0.910934842026424	15.9670631132227	0.000341032916296258	0.00599261647252246
ENSG00000117450	6982.92614957992	0.520679973505564	0.21897686631329	15.961076246842	0.000342055305009614	0.00600500616633297
ENSG00000112319	5.62333382204475	6.44706700143021	1.83178362399047	15.9586885029169	0.000342463919115828	0.00600660766382488
ENSG00000172005	4860.65447081306	4.12502412365377	0.98967925638186	15.9469719625379	0.00034447605334256	0.00602514723614414
ENSG00000136059	448.679229892558	-1.15598734842447	0.318980398928644	15.948992494498	0.000344128216638303	0.00602514723614414
ENSG00000276141	20.7496782245362	-1.01174397313535	0.590036482793505	15.9474881852797	0.000344387151629945	0.00602514723614414
ENSG00000185885	1192.04013026495	-1.97842970824002	0.616350563213387	15.9305162577712	0.000347322043597384	0.00605812873279309
ENSG00000274180	711.395279775167	0.646227037109472	0.162713390353376	15.9316282534971	0.000347128986957891	0.00605812873279309
ENSG00000231324	5.6779004404357	4.15798398097591	1.62216300652415	15.9322339128953	0.000347023881906499	0.00605812873279309
ENSG00000085063	12330.7022440528	0.259128747580148	0.266712864221296	15.9283837761515	0.000347692570034519	0.00605900726326268
ENSG00000155016	85.3291236961825	-0.0345013137077639	0.371021359536303	15.9167111022278	0.00034972775426585	0.00608354488611541
ENSG00000153294	1642.68058312315	0.719966611828569	0.179660294587567	15.9166207266328	0.000349743558049858	0.00608354488611541
ENSG00000180638	30.7021172242774	0.865960567308273	0.702208531458911	15.9005080155058	0.000352572597080184	0.00612712249746785
ENSG00000231991	5771.98204781646	-0.111244986098333	0.18585171104035	15.898244639092	0.000352971825188655	0.00612843283641771
ENSG00000270806	15.7720535663076	0.199645695266573	0.708929660408145	15.889599910546	0.000354500800007823	0.00614933789197804
ENSG00000171428	192.920745358907	0.791669211892116	0.24810849536579	15.8855534193364	0.000355218768261475	0.00615614944079525
ENSG00000049089	104.113570902293	1.4246434047609	0.689210966352412	15.8806318936963	0.000356093953769749	0.00616003480355805
ENSG00000168268	1033.20748419094	0.356565943211999	0.30019993713928	15.8809985652652	0.000356028674989538	0.00616003480355805
ENSG00000163564	8.09494717613396	-0.996562337221876	1.50696842256558	15.878253077849	0.000356517746721311	0.00616173365908749
ENSG00000074527	4914.41065440583	-0.499629980174913	0.336143070436981	15.8669610104341	0.000358536351128496	0.00619096755940399
ENSG00000170044	31.3628884793962	-3.40871453883082	0.831897973640252	15.8648703040069	0.000358911344221311	0.00619179324465662
ENSG00000146147	65.7015629186162	2.37975384952828	0.580955055787352	15.8584355500993	0.0003600679569405	0.00620608933069123
ENSG00000166446	212.106607296035	-1.89955206315701	0.462599915440772	15.8536202102079	0.000360935926211293	0.00621538890222813
ENSG00000162645	1394.36772920722	-0.0187817912209085	0.379754791312285	15.8430299464483	0.000362852198520603	0.00623703710899402
ENSG00000134242	149.922158432915	-0.847524174265374	0.464606336876908	15.8430804617371	0.000362843033844539	0.00623703710899402
ENSG00000140297	5536.44409606796	0.182224443311034	0.359682810761813	15.8104572400189	0.000368810122324164	0.00633369470506788
ENSG00000144485	65.4605481641162	2.08706962488109	0.535270691529019	15.7848043957673	0.000373571104549511	0.00640964021178558
ENSG00000119681	1899.5215605816	0.040458424198158	0.347045759677111	15.7723511174243	0.000375904453945957	0.00644383314395582
ENSG00000136147	690.066881632175	-0.758153519048124	0.208756433037734	15.7491835324834	0.000380284171022047	0.0065130117073233
ENSG00000184588	60.2920195692908	-2.14769042688268	0.52666918005529	15.7256938664482	0.000384776876503838	0.00658399854234642
ENSG00000235109	487.207442390754	-1.07595554206536	0.368438235872018	15.7179468816836	0.00038627019711972	0.00660358037984707
ENSG00000148848	19.4018129273398	-1.20677826460436	0.852104314059008	15.7160340356233	0.000386639811557808	0.00660393360445083
ENSG00000081320	1137.7549057314	0.804990531494281	0.307831700287722	15.7101425475668	0.000387780432637861	0.00661744336129083
ENSG00000165271	1321.74470429015	-0.435437123239669	0.217567193018234	15.707575133483	0.000388278548759126	0.00661997435609591
ENSG00000168447	1000.54631982357	-0.664344941785984	0.437323973631797	15.6912415141571	0.000391462529548843	0.00666825235977664
ENSG00000064989	149.396568371839	0.509270052368727	0.465855396039086	15.6748119315849	0.000394691557261147	0.00668714209594199
ENSG00000168016	618.619113570381	-0.372297017196709	0.352219979100218	15.6768966802693	0.00039428035525921	0.00668714209594199
ENSG00000008513	1674.12737107972	0.499037875472563	0.308202838645707	15.6796483901439	0.000393738255696444	0.00668714209594199
ENSG00000153048	1323.60542708568	1.02515394815456	0.270207187800373	15.6836696418807	0.000392947390707389	0.00668714209594199
ENSG00000175121	159.351330187857	2.23007097954918	1.10953992520026	15.6752905079437	0.000394597123535872	0.00668714209594199
ENSG00000101017	262.930573267175	-0.132173917382354	0.316201590676025	15.6772671412111	0.000394207329286861	0.00668714209594199
ENSG00000049192	48.9551442669922	-1.50091191766141	0.598501765476627	15.6609342969395	0.000397439773534565	0.00672768131855245
ENSG00000166106	414.169109731877	0.299324946095537	0.335449950476546	15.6542747987586	0.000398765353959364	0.00674408786745394
ENSG00000118849	1836.7184426147	-5.9439622040233	1.22502422541056	15.6490189714675	0.000399814653004176	0.00675579670366431
ENSG00000161955	85.8015850368876	-0.587616516266322	0.299477824458986	15.646442949674	0.000400329950417029	0.00675846950191103
ENSG00000131019	216.762371564472	0.407911199998354	0.293224385070132	15.6444276452643	0.000400733547082613	0.00675925345680788
ENSG00000163531	246.393540499606	-0.201369160540454	0.377949628663714	15.632894901225	0.000403051001025159	0.00679064749798852
ENSG00000146281	278.370936686808	1.03841408266577	0.296986082543585	15.6315980585631	0.000403312432641432	0.00679064749798852
ENSG00000165169	2083.91255433088	0.192948555866954	0.217109888288461	15.6159353843884	0.000406483308144685	0.00683795253923392
ENSG00000124225	4853.44317958427	-0.698886109610449	0.33604150301422	15.5807839116912	0.000413690703707488	0.00695301648993269
ENSG00000185745	2277.00809877478	-3.53057831416048	0.890014769026171	15.5777017980869	0.000414328716060803	0.00695756073775572
ENSG00000137843	136.195159911048	0.846891555545878	0.28751778743348	15.5741802273521	0.000415058902663627	0.00696364338023859
ENSG00000100311	159.212459107889	-0.535860782036692	0.339042459001115	15.5483568310378	0.000420452764958287	0.00704789067921663
ENSG00000278934	8.09466314211003	-1.11216808981824	0.983705400100618	15.5393791275588	0.000422344357446487	0.00707333359705732
ENSG00000135749	333.214580877568	-1.13288248563738	0.296001705610178	15.52222022844	0.000425983427846665	0.00712797203536529
ENSG00000134369	3595.84234083339	-0.793736138863198	0.252786803249795	15.51147131238	0.000428279021160409	0.00716005342355188
ENSG00000165959	695.718514591909	-1.55945164793338	0.396344264488584	15.4920382052917	0.000432460700054999	0.00722358230233086
ENSG00000231764	17.3762305226373	-2.83911607541309	1.17202014483298	15.4836763534351	0.000434272571219083	0.00724745009728496
ENSG00000175556	15.4371290643105	-1.58048531108607	1.04763897908509	15.4568346097342	0.000440140173844687	0.00733890113657331
ENSG00000105523	700.836655823446	0.70909622685742	0.32665640904904	15.4540169464995	0.000440760694239388	0.00734277829091586
ENSG00000177000	833.211119570217	-0.0123251013540898	0.198123939388014	15.447709482386	0.000442152929584869	0.00735629006013948
ENSG00000214796	27.4085970672498	2.87470487302759	0.733841808360572	15.446822009723	0.00044234917244062	0.00735629006013948
ENSG00000106484	199.321198557384	0.0867690403467375	0.404997271075599	15.4354612583812	0.000444869032016696	0.0073917001149394
ENSG00000092421	165.579427812755	2.00468094988499	0.651652717545816	15.4232574676477	0.000447591875105457	0.00743041775120243
ENSG00000280027	9.68629876824584	-0.91640443934866	1.07379048488136	15.4094153141642	0.000450700437713538	0.00747546519169914
ENSG00000235888	14.1959414588313	-1.51098213035624	0.853616487694527	15.403787441418	0.000451970466120132	0.00748996591184194
ENSG00000114115	98.8366823688358	1.1275141814655	0.447220950711673	15.3961659204236	0.000453696103224897	0.00750369892768841
ENSG00000240207	22.8431005306529	-3.38240860380611	0.856176935817908	15.3975785352694	0.000453375767440536	0.00750369892768841
ENSG00000101265	44.4288330950856	3.10331937301985	1.08154075632007	15.3948767039542	0.00045398865374918	0.00750369892768841
ENSG00000109814	895.619218458626	-0.0288665247408109	0.255448558727119	15.3876497642578	0.000455632095536375	0.00752429093195977
ENSG00000151572	164.937257828182	-1.45767258173774	0.530850974628783	15.3732662914095	0.000458920692661594	0.00757199137630398
ENSG00000081985	21.9372872410644	2.05968095575697	0.711246414262126	15.3715035988295	0.000459325339002061	0.00757206623746865
ENSG00000152910	6.82735171224236	-5.76183893357237	1.84828929970454	15.364544429829	0.000460926384202871	0.00759184666757122
ENSG00000137936	1531.83085582553	-0.433349063895454	0.32850437022143	15.3591950868386	0.000462160861038145	0.00760556025664947
ENSG00000218416	41.1829080167127	0.852505487984729	0.557188980500577	15.3553369331963	0.00046305326532429	0.00761362558319911
ENSG00000134775	393.997597410902	0.249673329317224	0.459974342718259	15.3289775902912	0.000469196549534361	0.00770793810758489
ENSG00000100284	1244.69626701446	1.21663892825635	0.306838817899575	15.3260448020298	0.000469885081306823	0.00771255434842291
ENSG00000173530	828.539763052894	0.515284091702367	0.430325024420455	15.3174114192614	0.000471917814373051	0.00772168104278804
ENSG00000129514	1575.44532423426	-0.197984935276153	0.473060903128525	15.3217620292264	0.00047089236493712	0.00772168104278804
ENSG00000171246	9.48448054559016	-2.9769816715577	1.14866412930773	15.3177802853768	0.000471830785153345	0.00772168104278804
ENSG00000226137	444.180362853348	0.574612238864979	0.257793537051108	15.3167530762108	0.00047207318184971	0.00772168104278804
ENSG00000143819	1028.65489042804	0.486707889628009	0.364279390577696	15.3047786030525	0.000474908073787943	0.00776134308846012
ENSG00000198734	7.99713287200439	0.901371408114448	1.76745711721664	15.2981165080192	0.000476492652836629	0.00778052066862227
ENSG00000232453	35.3631889548736	-0.490019160424161	0.521753794081312	15.2905541011051	0.000478297779126953	0.00780326333618757
ENSG00000125848	1431.78373980785	-1.1202344569253	0.395950960062337	15.2816687557338	0.000480427426766782	0.00783125671969109
ENSG00000140511	107.639503948933	0.0903706863650164	0.361575333928481	15.2706804787669	0.000483074225863147	0.0078676245477281
ENSG00000119121	39.9251109176642	-0.308594907132316	0.510475039508726	15.2318065125976	0.000492555577354413	0.00801514557302861
ENSG00000104131	2259.25569999322	-0.00413410660728273	0.146765506212946	15.2292465084482	0.000493186453190389	0.00801851686136437
ENSG00000140284	217.736285527925	-0.243964960476421	0.536131363092673	15.2176674082207	0.000496050062382265	0.00805815230093078
ENSG00000121316	1713.65643246149	0.782455784751095	0.43451632496827	15.2158033512871	0.000496512610681974	0.00805874884833306
ENSG00000135914	6.67819769194124	4.21475144766626	1.32849639959061	15.2124256819712	0.000497351846853094	0.00806545304344028
ENSG00000198648	1841.37846726529	0.917473683333645	0.332581439762833	15.2079776034246	0.000498459207843868	0.00807649016134007
ENSG00000149403	13.1330224207041	3.40271007890408	1.12296296757989	15.2057016945584	0.000499026754569058	0.00807876931584211
ENSG00000102271	10.2856033362771	-3.81070835023612	1.62329023667955	15.1978775651878	0.000500982803112178	0.00810350388794699
ENSG00000135503	1602.98623516866	0.0851610853600919	0.185864784538838	15.1919258337735	0.000502475881153862	0.00812071396313992
ENSG00000173338	34.1672333425512	0.220011593586112	0.824760666216686	15.1824834856785	0.000504853766030812	0.0081521821861204
ENSG00000116667	1284.79002553044	-0.417644852531538	0.258678421441829	15.179902741526	0.000505505635719858	0.0081557494936047
ENSG00000068079	577.980412150192	-1.14240451569618	0.351546386029467	15.171996967708	0.000507507796881009	0.00818107756045409
ENSG00000081853	43.7928052517356	0.373467168729845	0.511893439046759	15.1543039503046	0.000512017386674716	0.00824674812154809
ENSG00000153904	75.4081428711929	0.92313060714184	0.55347494418095	15.1452587749855	0.000514338274442446	0.00827000737002743
ENSG00000107554	1086.30064760081	-0.538700714095875	0.247701300640057	15.1453113894812	0.000514324743795941	0.00827000737002743
ENSG00000137872	180.412694017242	-0.929683920077239	0.6498014508761	15.1435711857296	0.00051477245346855	0.00827000737002743
ENSG00000198467	586.590698235046	-1.6113160876639	0.480880383159737	15.1278387290683	0.000518837739397069	0.00832824785249324
ENSG00000110446	41.5059772837944	-1.01288686602304	0.583563612513842	15.1196274318811	0.000520972283678113	0.00835542412593923
ENSG00000149380	62.8598772823955	-0.433857793473428	0.457307909725221	15.1120382310393	0.00052295292081169	0.00838008808328639
ENSG00000075213	178.078773621509	2.04869913927075	0.664524208060426	15.0957501412124	0.000527229262610403	0.00843528042671143
ENSG00000132746	2825.08838658808	1.09106936553033	0.445170624004695	15.0955250645103	0.00052728859946101	0.00843528042671143
ENSG00000244617	47.8691363460305	0.0399195536950263	1.01095943238463	15.0928892535626	0.000527983974110918	0.00843711915979266
ENSG00000163378	906.439899377905	-0.316176870549773	0.217774866373935	15.0917107703115	0.000528295175923609	0.00843711915979266
ENSG00000120093	48.6380879935998	-4.87062966221798	1.65518538787935	15.0877507479268	0.000529342242544546	0.00844671327163199
ENSG00000182492	156.825882788659	-1.4539713383422	0.513417664830466	15.0800370596785	0.000531387775176982	0.00847221031611153
ENSG00000229028	5.28364646703069	2.26850095948137	1.99676579963076	15.0697532397645	0.000534127160068804	0.0085087175962139
ENSG00000165949	576.447252305859	-3.30994131499377	0.896421435003134	15.0607089827561	0.000536548021321582	0.00853291706177389
ENSG00000224271	9.51926558303483	4.05913462708411	1.87164564590644	15.0620787966207	0.000536180661680219	0.00853291706177389
ENSG00000070886	12.1188844425945	-5.95147820271415	1.5851626530778	15.0583820813816	0.000537172631767012	0.00853567762904341
ENSG00000183255	5483.47272178041	0.198783584418409	0.211673368829621	15.0565722529874	0.000537658946911326	0.00853623789454433
ENSG00000166415	41.7489460423381	5.37619588560518	2.01864722003483	15.0453422175473	0.000540686403081354	0.0085771082802302
ENSG00000154134	172.353646302326	-2.11060664773978	0.766733358346546	15.0188786906539	0.000547888178688064	0.00868407351898795
ENSG00000242247	1413.63792774568	-0.652165450981568	0.245067741477859	15.0107998230547	0.000550105812692898	0.0087119267826051
ENSG00000012779	7.43499662673288	-4.357962027917	1.51461830933966	14.9897530813554	0.000555925347020213	0.00879672842170361
ENSG00000109501	537.27559979799	-0.50311066493377	0.208322632782017	14.9855965445016	0.00055708191052507	0.00880766512672259
ENSG00000144648	47.1231306057173	1.24918698623246	0.39890609727996	14.9812409327034	0.000558296448830407	0.00881214369817803
ENSG00000050165	1462.97045431049	1.16028419158576	0.331066944022175	14.9823473536783	0.000557987678795072	0.00881214369817803
ENSG00000138942	1016.60077242975	0.6976798498088	0.179530624462835	14.9774036488434	0.00055936864806078	0.00882170972045856
ENSG00000140835	27.390861497357	2.5852735986744	0.691899817727945	14.9750164191093	0.000560036717424712	0.00882489165467333
ENSG00000150722	17.7378688533964	-1.16018000965737	0.700769040343432	14.9712869603528	0.000561082008634311	0.00883400749867249
ENSG00000162552	261.646507553433	1.61827328402827	0.460263265039914	14.9631129958459	0.000563379833232054	0.00886281242220833
ENSG00000158292	1490.57034166844	-0.435109096417946	0.252290488082726	14.9497110343573	0.000567167707709269	0.00891499075448332
ENSG00000176490	79.5934164329572	0.382862306014214	0.354893548864313	14.9362386969058	0.000571001141918554	0.00896779801726857
ENSG00000132530	915.970533479675	-2.56758614328684	0.631650353002292	14.9333939781075	0.000571813888631632	0.0089731159555171
ENSG00000184481	423.52422463888	0.559676324178316	0.207821235050777	14.930023534897	0.000572778334174915	0.00898080362407644
ENSG00000273301	8.89884955651434	4.74084696801681	1.76671248569841	14.906160861937	0.000579653277280439	0.00908107472891747
ENSG00000162366	2251.83291082871	1.28570868212865	0.329297341785479	14.9017110009589	0.000580944401328144	0.00908625850837614
ENSG00000273760	345.254362829819	-0.0709621695914128	0.25780893465082	14.9031436102459	0.00058052841715933	0.00908625850837614
ENSG00000165078	23.5628187869707	-3.21524932421185	0.90011942201099	14.8957592618004	0.000582675791016509	0.00910581283648838
ENSG00000244541	20.4816128743735	-1.4540297215195	0.620170272030824	14.8896269111943	0.000584465118931291	0.00912623958397251
ENSG00000156486	20.6128183590239	-0.582406418870267	0.676396123495771	14.88679955938	0.000585291947484581	0.00913161591603107
ENSG00000248874	22.909927669555	-2.11471609062648	1.05965772794077	14.8794272521903	0.0005874534047852	0.00915778886784177
ENSG00000177685	184.689426307443	-0.755640590104685	0.523438361871007	14.8736502831545	0.000589152707873748	0.00917672016173718
ENSG00000171368	369.229904146575	0.567694587740955	0.389919445140177	14.8613278615257	0.000592793807180905	0.00922584111916006
ENSG00000233850	15.9945849333879	3.57670472926706	0.983985184286415	14.8477425469673	0.000596834159178296	0.00928108994449404
ENSG00000177627	51.5891724253828	2.19741015781984	0.608011211462415	14.8144599045234	0.000606849370181164	0.00942908401533541
ENSG00000169891	48.5704624927801	1.29139442637136	0.451765384403142	14.8009102428497	0.000610974630198446	0.00948539366407349
ENSG00000137709	85.1136992320207	0.505239643209451	0.550263234831317	14.7756446275326	0.000618741913185303	0.00959810713691136
ENSG00000125740	109.8047297302	-1.72525640736947	0.597792783848051	14.7701855995573	0.000620433084880517	0.00961645874804569
ENSG00000250208	28.5227709649935	-0.564990977467127	0.82848812963772	14.7544544361099	0.00062533239471574	0.00968446445989803
ENSG00000158786	23.7068294555168	-3.35216345226634	1.45389750930779	14.7464796712121	0.000627830811893327	0.00971426871923174
ENSG00000133142	820.734284020955	-0.613062604334772	0.21416779429117	14.7434691872997	0.000628776560784678	0.00971426871923174
ENSG00000183762	1557.73477526918	0.876851352698923	0.270415105810572	14.7434048553611	0.00062879678631751	0.00971426871923174
ENSG00000101811	614.22085352176	0.634225135567048	0.183824837896328	14.7315444728866	0.000632536749899044	0.0097561189827542
ENSG00000167754	1999.64835843398	-2.11172938113278	0.805467003845344	14.7328600147833	0.000632120822408702	0.0097561189827542
ENSG00000135205	141.589435799765	0.737623104190034	0.383886666037789	14.7285668705861	0.000633479172705883	0.00976269816242577
ENSG00000102804	2529.07381559433	0.544526537764437	0.223019485584063	14.7218145077361	0.000635621527776611	0.00978774403024602
ENSG00000205403	41.8527069947828	0.248852915876576	0.613597766777635	14.7197249455893	0.000636285960151411	0.00979000959013452
ENSG00000124299	920.82286659686	0.83426045554273	0.218606927281006	14.7097889178957	0.000639454902769617	0.00983077500805443
ENSG00000271425	180.876112744776	-1.01177365696108	0.265157026709243	14.7052667231259	0.000640902408436958	0.0098404541083858
ENSG00000197746	28032.5949861674	-0.817659615444508	0.213305644113783	14.7045739897958	0.000641124434115704	0.0098404541083858
ENSG00000167034	78.4525118165076	-0.126964982444737	0.485772468602155	14.6951028614188	0.000644167720177259	0.00987915243464719
ENSG00000171346	34930.4679861605	0.00907603235397762	0.429640730918011	14.6897312126805	0.000645900167020468	0.00989770093996952
ENSG00000165092	111.29854103861	2.13184382556828	0.783015589463491	14.684759475148	0.000647507787410579	0.00991430815270648
ENSG00000145283	174.182218238715	-0.685901489448594	0.479952678437162	14.6743767859644	0.000650877963765431	0.00995785405356571
ENSG00000148346	42815.7579018209	0.116673256244597	0.274747964265624	14.6679559634691	0.000652970907508586	0.0099818048663974
ENSG00000198736	557.500712009308	-0.276693814786991	0.247301006307578	14.6609595067046	0.000655259148932008	0.010008700075495
ENSG00000253187	9.52225795513713	-3.85710293245435	1.16239956399382	14.6508309576717	0.00065858597801928	0.0100514029306572
ENSG00000165071	17.5440837411856	1.9762855748545	0.759843333812582	14.6490007673016	0.000659188922710525	0.0100524982774349
ENSG00000246082	32.3353383925024	-0.656699794966649	0.419874439327781	14.6425786391512	0.000661309022645691	0.010076709543937
ENSG00000173930	29.7193100712246	5.21188721969382	1.99267543734897	14.627654385957	0.000666262252120838	0.0101440169922662
ENSG00000077348	294.875011483855	-0.142744138815489	0.23984711358026	14.6112483865531	0.000671750078723813	0.0102193490674021
ENSG00000220412	9.28877581838253	2.0260163669226	1.17325364022294	14.6053161262715	0.000673745534807628	0.0102414732901481
ENSG00000107815	467.269616643042	-0.533071190412767	0.207227888118974	14.6012120349064	0.000675129510928934	0.0102542744737802
ENSG00000224810	20.2498418247385	1.20521587845226	0.703384621893235	14.585415889783	0.000680482845478975	0.0103272957904488
ENSG00000185633	2901.60143590292	-0.742850586128794	0.612346284810802	14.5819343801744	0.000681668430868837	0.0103369992421416
ENSG00000050628	6.42915377415076	4.03243765783845	1.7555557123945	14.5752822271897	0.000683939486971795	0.010354843832753
ENSG00000134874	85.2757543648925	0.297012811987296	0.489988728305694	14.5755616194037	0.000683843949961255	0.010354843832753
ENSG00000197641	7896.696268515	-0.807193272128595	0.212616096212216	14.5667555133576	0.000686861589671037	0.0103907718501394
ENSG00000153898	7.67825371373592	-4.55985279608464	1.756384757229	14.5558866876714	0.000690604440000941	0.0104343860356712
ENSG00000163453	936.567189323132	0.208250677079291	0.473683694039293	14.5551834012319	0.000690847329072442	0.0104343860356712
ENSG00000196167	120.593260571841	2.51237209749294	0.639192476865084	14.5522440275564	0.000691863404772505	0.0104378806162985
ENSG00000013588	23650.4895666671	-0.942131206440494	0.332277885059935	14.5513238999552	0.000692181779310677	0.0104378806162985
ENSG00000157680	30.3885657117637	1.75723868838191	0.878617874598442	14.5338710727838	0.00069824847554533	0.0105209812099485
ENSG00000146233	86.9644567159933	1.97479747467822	0.577791628232828	14.5003695356356	0.000710043183592098	0.0106869974929217
ENSG00000091137	11.6307876183619	0.365473594652696	0.775538105682956	14.4993762101521	0.000710395923175454	0.0106869974929217
ENSG00000149260	1626.44317564917	1.37029357627896	0.36558411819864	14.4736874500768	0.000719579369975013	0.0108165524835402
ENSG00000099994	29.9800222547694	-0.351790527698716	0.643013162463436	14.4506419658615	0.000727918852060193	0.0109332256152692
ENSG00000124535	1976.35820371875	0.616771107518276	0.163279764405126	14.4396188704941	0.000731941887916138	0.0109849327746336
ENSG00000108479	319.734107036519	0.137880381994151	0.291883270777476	14.4362695004519	0.000733168686996449	0.010994625516171
ENSG00000133019	8.29479398041685	5.23479972623563	1.70332342092922	14.432281006668	0.000734632265254906	0.0110078508471489
ENSG00000142621	8.22638737366332	-2.43581733160156	1.06350594527557	14.4213730257066	0.000738649888717487	0.0110592952088437
ENSG00000084234	31706.121588441	-0.160914077079009	0.238753883160054	14.4095911904536	0.000743014056221596	0.0111158426988093
ENSG00000152642	892.175207145515	0.959468029551575	0.301079470501436	14.4041833065936	0.000745025841732667	0.0111371359042581
ENSG00000163121	7.87088451769285	-0.758670691005602	1.00532667954656	14.4006423048315	0.000746346079037635	0.0111480659398479
ENSG00000181617	513.61833188195	13.0090765925834	3.22557827669683	14.3800340058768	0.000754076298871688	0.0112546482303996
ENSG00000127080	553.329375356485	-0.157555425138977	0.207336700722595	14.3741268294686	0.000756306822135088	0.0112790438210453
ENSG00000111859	352.077366760783	-0.0233825241177774	0.431980115347187	14.3610729671253	0.000761259329463321	0.0113439628425932
ENSG00000019102	348.934021989881	1.65381805834136	0.475277940428015	14.330242389962	0.00077308527773159	0.011511124217994
ENSG00000103855	1917.24721674687	-0.156582137271016	0.268441457920672	14.3254233751518	0.000774950278397212	0.0115298223417195
ENSG00000177156	5530.64660547848	0.57962266166757	0.189362495511349	14.3226493337532	0.000776025896253938	0.011536755763241
ENSG00000115129	4340.76748741537	-1.08225327077512	0.343181799668946	14.3084644413727	0.000781549382526058	0.0116097504429401
ENSG00000115457	5134.43445560647	0.435794357930267	0.298968391720626	14.3053490860115	0.000782767733208009	0.011618728902715
ENSG00000064692	14.4067562890034	-0.197596908865151	1.36159460756925	14.2963994165348	0.000786278338283312	0.0116616908714825
ENSG00000026652	354.223455815727	0.209398020138004	0.439673802401009	14.2694868316078	0.000796930236359484	0.0118104187338318
ENSG00000158023	428.030519852426	0.127074170234597	0.562158183172372	14.2646070074499	0.000798877050130682	0.0118300063957145
ENSG00000140743	25.7366596675711	-1.76483687783126	0.792918417118572	14.2624318788593	0.00079974635291238	0.0118336198036488
ENSG00000196639	657.464697386863	-0.0785266820529006	0.288247352464308	14.2530601802908	0.000803502637606624	0.011870638108279
ENSG00000130023	33.9244749140691	2.8065736704515	0.722377587861204	14.2544850375203	0.000802930403197844	0.011870638108279
ENSG00000185420	127.40859435406	0.267451702718705	0.334662657411119	14.2342709782681	0.000811086793577741	0.0119546865797965
ENSG00000171227	89.0842933630465	2.91718916846187	0.745889793416127	14.2344560264848	0.000811011751966995	0.0119546865797965
ENSG00000269729	9.18306609017822	-4.00124520307867	1.32665359742262	14.2370882560028	0.000809945069522712	0.0119546865797965
ENSG00000185338	74.721902909638	-1.52972075330984	0.480447259254951	14.2258322794516	0.000814516282177673	0.0119958915488035
ENSG00000170412	719.303898063312	0.127021103955803	0.420831457994235	14.212415586076	0.000819998708228772	0.0120578675627269
ENSG00000128284	206.254313489848	-1.76796314363885	0.464845570760389	14.212940963073	0.000819783332288935	0.0120578675627269
ENSG00000164675	10.40363354244	-0.293209711095456	0.748490582343288	14.2100081989633	0.000820986329667585	0.0120630173050924
ENSG00000182718	79052.2992298895	-0.166271457561665	0.186813511892631	14.1904755135869	0.000829043644712291	0.0121719557611948
ENSG00000226124	8.59639536255162	-0.128081404337141	1.12946470080653	14.1834138830082	0.000831976018477262	0.0121960853212101
ENSG00000286010	271.653782385239	-0.773546638447546	0.433958772764896	14.184552095437	0.000831502670460337	0.0121960853212101
ENSG00000108551	22.6786071939467	-1.84841706240041	0.656536685894712	14.1773503128888	0.00083450221845276	0.0122236489815933
ENSG00000187193	1226.4791924814	1.2644957889118	0.347532668894967	14.1709445575729	0.000837179311876551	0.01224390917872
ENSG00000258405	29.2274973573633	-2.15277097240815	0.582942284006008	14.1721526949832	0.000836673750765831	0.01224390917872
ENSG00000170456	119.144586609197	-0.925435655854892	0.349645371981036	14.1687584932871	0.00083809487605319	0.012247834385565
ENSG00000163565	4965.45682902975	-0.180903338357045	0.217418639804922	14.1559798008422	0.000843466897961995	0.0123168295092058
ENSG00000143149	1503.09327182895	1.05258303747662	0.309008699576168	14.1533698895559	0.000844568303336581	0.0123188329374251
ENSG00000151320	114.563315171845	1.35019538420532	0.450837448443175	14.1525704710211	0.000844905952590636	0.0123188329374251
ENSG00000100373	5.01376117959953	-6.33896280614705	2.11152633670114	14.142793320892	0.000849046451085356	0.0123696721222405
ENSG00000136997	4765.57335082982	-0.290046508494663	0.196346799088269	14.140074121008	0.000850201599683065	0.0123769732876939
ENSG00000179348	21.2329304778241	-2.54585091819617	0.89724181226759	14.1351489199108	0.00085229788670824	0.0123960462541748
ENSG00000120833	347.91236815328	-1.33527818058261	0.369477329475249	14.1339199264433	0.000852821781925266	0.0123960462541748
ENSG00000104327	28.3829812499898	-4.95742143746754	1.22684782151921	14.1323763205393	0.000853480246363824	0.012396096440856
ENSG00000141622	44.2992721967582	0.412444325203771	0.521383045772771	14.1273922666424	0.000855609794481301	0.0124174964421462
ENSG00000179846	90.3968345321598	-0.426339847221862	0.50997144188135	14.1217922820006	0.000858008852440105	0.0124427720555011
ENSG00000129295	101.25208351715	0.621889905784093	0.323299004424027	14.1130468789338	0.000861768883821169	0.0124877305714515
ENSG00000116260	6791.17515142914	-0.786801365701559	0.27079069237743	14.1009129141735	0.000867013112691227	0.0125446344659281
ENSG00000107798	1401.8256655137	-0.864574971177919	0.2359252680568	14.1008935674127	0.000867021499679472	0.0125446344659281
ENSG00000108604	2758.14020370516	-0.134122846793888	0.173894515054832	14.0979870894817	0.000868282405083252	0.0125532807610394
ENSG00000205336	3241.39932509509	0.499977489437777	0.156426752952273	14.085957307721	0.000873520767298512	0.0126193744436064
ENSG00000139722	3256.50976479761	0.69463266443842	0.196691305805807	14.0815123908065	0.000875464289814459	0.0126378044887404
ENSG00000141753	1757.95640207347	-0.864896556878528	0.464572282284304	14.0766307186595	0.000877603764625534	0.0126590329615383
ENSG00000099797	4397.74157288665	0.787438496890949	0.214518256181603	14.0622039705663	0.00088395713591769	0.0127409663345333
ENSG00000128595	3565.16133805116	-0.264974650549663	0.229540044236203	14.0540545211729	0.000887566366206344	0.0127832522682306
ENSG00000125144	11.3530214538879	1.83441222147059	0.746001402377828	14.0490723655189	0.000889780119271982	0.0128053906899029
ENSG00000185742	14.5424932843511	-5.34759492549747	1.64937541784241	14.0208684586381	0.000902416647539787	0.0129773822604031
ENSG00000145632	5577.62605945055	-0.843327370676678	0.232616122703147	14.0139461438734	0.000905545465122919	0.0130124889350427
ENSG00000254670	9.27756140744085	3.60414356264108	1.0132592313947	14.007377368784	0.000908524516871999	0.013045391867832
ENSG00000100767	614.447571463927	0.39358081002274	0.503527017302632	13.9968988094132	0.000913297022245022	0.0131039773661767
ENSG00000165181	21.9382075479444	-2.3224755649995	0.663033261379492	13.9920827744421	0.00091549890746921	0.0131256188059506
ENSG00000111696	126.059059627281	-0.938334200585171	0.47534229393748	13.9548264265139	0.000932712814429562	0.0133521860915881
ENSG00000261040	610.934531155516	1.98886561375057	0.527678606393013	13.9551952068832	0.000932540847196499	0.0133521860915881
ENSG00000176834	443.585648707359	0.171210386988804	0.366953832801929	13.9500087482372	0.000934962277771737	0.013374271433734
ENSG00000166347	838.913027661568	0.271956143627604	0.258231911757944	13.9376977371739	0.000940735192621024	0.013446686948907
ENSG00000196873	111.190524055846	-1.1685456731418	0.312343984001729	13.9185310158697	0.000949793934515265	0.0135659246873218
ENSG00000100292	265.07926218644	1.22414625395489	0.376957837765528	13.9134167164591	0.000952225807801848	0.0135904022719834
ENSG00000221869	2486.3266689588	0.583522024082568	0.185434539979319	13.9117584123775	0.000953015675188529	0.0135914255108839
ENSG00000183569	261.007956968143	-3.36351041918674	1.02076643990071	13.8868801321441	0.000964944408485189	0.0137511844356794
ENSG00000148926	1492.97194489255	-0.88811414678977	0.237528671504401	13.8817122379628	0.000967440997920524	0.0137763889282512
ENSG00000198892	21.1441364051419	-2.32280757707096	0.699067462961217	13.8726922239334	0.000971814017369318	0.0138282558486574
ENSG00000182489	30.1845059620261	1.76612492516158	0.596804234824419	13.8638385353128	0.000976125623085219	0.0138791716129886
ENSG00000261068	800.621101027838	0.0166847151975464	0.216394254476032	13.8619075724013	0.000977068509369173	0.0138821483031619
ENSG00000002549	1830.575819599	-0.611444059945337	0.287606847325547	13.8519880832618	0.000981926556981811	0.0139342322640928
ENSG00000128285	6.79310153060243	-0.130901850739456	1.60748859022911	13.8514171309381	0.000982206913622185	0.0139342322640928
ENSG00000142583	68.6088854501063	-2.77632186203266	0.72925733636321	13.847104252481	0.000984327268527825	0.0139538528516023
ENSG00000159899	64.0372203844717	-0.1498015103041	0.495164672238494	13.8338470249706	0.000990873666601855	0.0140361408236827
ENSG00000184205	584.785661973792	-1.27754965911271	0.377060347939316	13.8256645058578	0.000994935892102709	0.0140831426761733
ENSG00000122884	1867.20779204186	-0.42502017105845	0.322443255394846	13.8173459638258	0.000999082718029775	0.0141312708809518
ENSG00000204767	11.7772314314007	-3.82520561648874	1.1662169121132	13.8085151961508	0.00100350380493046	0.0141832035162876
ENSG00000262001	48.0752506935986	-1.99124884315425	0.526167424748243	13.8048058801184	0.00100536668827835	0.0141883404740252
ENSG00000237945	279.723931781293	1.19707566905634	0.690510157806411	13.806214597976	0.00100465879860825	0.0141883404740252
ENSG00000254560	8.68160524677448	4.72068177215203	1.54967442503042	13.798761771603	0.00100840955649982	0.0142105525187614
ENSG00000165841	3.94553974824548	5.89660657023138	1.80231143483946	13.7986966740429	0.00100844237953483	0.0142105525187614
ENSG00000140199	3570.2872847226	-0.370472548881615	0.25904912376383	13.7711852863356	0.00102241005144091	0.0143966593924994
ENSG00000196369	118.830551727507	-0.690190795885519	0.29969360071815	13.7694822969652	0.00102328099891676	0.014398210337918
ENSG00000130558	7.94697072012752	1.08291768681931	0.867084115324045	13.7653403868019	0.00102540236376889	0.0144173400700789
ENSG00000169252	580.589959211349	0.778606991077978	0.253600917089399	13.7621589542322	0.00102703478602358	0.0144295718823283
ENSG00000182667	109.462137083869	-1.36405820249	0.689041401323935	13.7335546394345	0.00104182914261225	0.0146265701216148
ENSG00000148426	602.909128459299	0.254595059970908	0.185685179328231	13.7118603551545	0.00105319152468604	0.0147751294326785
ENSG00000104332	2223.97626378602	-1.23384462871841	0.376275061576206	13.7030528118511	0.00105783976705326	0.0148293463640614
ENSG00000139725	43.5081718251236	0.145193159177727	0.540568707597813	13.6803378051608	0.00106992267167726	0.0149876288390024
ENSG00000135049	173.752781926431	1.21887920271899	0.328666302545944	13.676693797753	0.0010718738517368	0.0150038555060051
ENSG00000215559	40.8854213869009	0.46612488658965	0.974257628487185	13.672009441483	0.00107438731357448	0.0150279230668123
ENSG00000120889	4615.58734732601	-0.18181993492681	0.230802488268204	13.6442350886784	0.00108941160072885	0.0152257231171248
ENSG00000276317	21.6477393343739	2.82055632305473	0.748369293744528	13.6429026322565	0.00109013763929745	0.0152257231171248
ENSG00000137573	187.222075634107	0.0587810804193773	0.360042344950628	13.6376810743358	0.00109298746622534	0.0152318025024407
ENSG00000204381	194.997473114825	0.721986363891906	0.587248143375848	13.6378566276662	0.00109289153164095	0.0152318025024407
ENSG00000078804	1294.7907063672	0.660539756816961	0.214960248366138	13.6396204021669	0.00109192814939288	0.0152318025024407
ENSG00000116883	156.065769790343	-2.38117152161332	0.711069311806898	13.6250614143951	0.00109990583520898	0.0153074633941636
ENSG00000020577	385.130988934764	-0.733005358185343	0.443673696471244	13.6248277311133	0.00110003435751982	0.0153074633941636
ENSG00000102409	321.239460886812	0.341612818623562	0.355723186516787	13.6208555975907	0.00110222127015196	0.0153266256705553
ENSG00000134398	163.827187587404	0.14501821435442	0.668587401380096	13.6070593078849	0.00110985083680744	0.0154213855261239
ENSG00000197057	11.3907642227369	-0.0416500103440262	1.0130449026289	13.6042177395219	0.00111142881603869	0.0154319811764726
ENSG00000242317	47.5055899734771	1.27731961516987	0.754024178318194	13.6007131825007	0.00111337805617612	0.0154477123996576
ENSG00000234840	13.4465486727616	2.72083545931926	0.973010946402044	13.5759722074535	0.0011272366274408	0.0156285371240418
ENSG00000105514	1758.52194629879	0.430974880540566	0.281217123246608	13.5680304838787	0.00113172162705367	0.0156792326442098
ENSG00000175773	4.76043786609953	5.40338385530248	1.53276068486265	13.5566426227199	0.00113818395198862	0.0157572284501716
ENSG00000184185	8.69024130258999	3.44499133690395	1.16523517788067	13.5537838768878	0.001139812004573	0.015768232592503
ENSG00000046653	93.7314301701497	1.0872774567342	0.353777451725417	13.5333249942342	0.00115153148426719	0.0159187241342268
ENSG00000029993	1010.43255623696	0.178893585423943	0.332334213423172	13.5293560298334	0.00115381894696473	0.0159387033367209
ENSG00000167850	6.90995741426596	-0.844401289912875	1.21279028728077	13.5162812895698	0.00116138659780174	0.0160315400170663
ENSG00000089327	1114.30185235307	-1.50105046122587	0.426956102506696	13.5143119685167	0.00116253073254034	0.0160356371088382
ENSG00000128833	416.869850245923	-0.00824481689358584	0.31747927189831	13.5070002123361	0.00116678858152084	0.0160826466899358
ENSG00000165185	153.33813630427	1.0954162873092	0.313333660030445	13.502680551522	0.00116931137039511	0.0161056897268758
ENSG00000164506	1462.43195992014	-0.0138905192798247	0.211883184256082	13.5003348761321	0.00117068358738405	0.0161128631936314
ENSG00000272398	70010.4693636335	0.380955793347264	0.213599353119916	13.4964736149251	0.00117294592811432	0.0161322686697409
ENSG00000107859	9.24780334398881	1.70063172926695	0.88987135478843	13.4872359671909	0.0011783760895879	0.0161951833663406
ENSG00000101276	212.867673634803	-0.880893584290434	0.318775273393394	13.4857023724664	0.00117928001178341	0.0161958448642969
ENSG00000168615	6592.90609342883	-0.223358998126946	0.313926463579482	13.472910682656	0.00118684667564883	0.0162879429562394
ENSG00000110721	224.09264728896	-0.128605561674622	0.312408545891153	13.4569857145786	0.00119633464714193	0.0164062559399718
ENSG00000182197	1571.78811054033	-0.904709091394286	0.258684765118573	13.4465439479619	0.00120259690376339	0.0164801929063882
ENSG00000091128	12.6580039633694	3.41944429197149	0.938052775600082	13.4425256532561	0.00120501552702087	0.0165013884579378
ENSG00000119922	397.388488935706	-1.63149161905869	0.438459929227148	13.4273971750683	0.00121416511378356	0.0166026551866719
ENSG00000054690	268.683716753569	1.07935826075135	0.380432790505194	13.4284211683499	0.00121354362443772	0.0166026551866719
ENSG00000163993	5959.25591972112	-1.46902922929997	0.405262889802371	13.4205404251602	0.00121833487071064	0.0166476443524902
ENSG00000134769	14.8583145518496	-1.30636595304705	0.716129155080013	13.4180512213463	0.00121985215662666	0.0166563506956419
ENSG00000106392	1579.8011471628	0.407051590516291	0.233079407441446	13.4007613347964	0.00123044342381505	0.0167888549356163
ENSG00000115526	17.3916132766745	-0.707785853399633	0.629342771853123	13.396402258481	0.00123312814687352	0.0168133646826955
ENSG00000172661	943.312922292815	0.527181326683369	0.199447394259019	13.3930530108716	0.00123519490265873	0.0168294193900766
ENSG00000163220	241409.152008426	0.870406521303737	0.244711121120632	13.3855509536096	0.00123983685470823	0.0168805125721965
ENSG00000179913	2607.00999897681	1.32730948251203	0.357874629562709	13.371827203553	0.00124837371620234	0.0169845237808262
ENSG00000183496	107.648602118018	-0.2237657403388	0.460842420283327	13.3606225942274	0.0012553871133439	0.0170676732184147
ENSG00000111799	3049.13600730376	-0.939086153391703	0.334901060305699	13.3562187202194	0.00125815444230703	0.0170930171002588
ENSG00000214711	4177.37023128807	0.826057956122277	0.50644914761514	13.3380670508893	0.00126962521870557	0.0172271834892399
ENSG00000178035	3228.82696027607	-0.0764307732977254	0.136368266508745	13.3375345889919	0.00126996327723089	0.0172271834892399
ENSG00000148120	790.336021680639	0.570423086820949	0.23689241177382	13.3362790045978	0.00127076080058012	0.0172271834892399
ENSG00000169554	46.3926052503761	-2.48721412915545	0.788016322119024	13.3323329588544	0.00127327051575268	0.0172488507592123
ENSG00000261150	1117.17223646077	-0.483526612606489	0.340782688084416	13.3284198905825	0.00127576415162746	0.0172702693630541
ENSG00000137547	827.140448505769	-0.360982587133556	0.184997240551804	13.3222752793204	0.00127968971619363	0.0173110277905393
ENSG00000171224	55.6566672981119	-0.085224956206688	0.381626881257735	13.3100927876033	0.00128750840949431	0.0174043547497713
ENSG00000171105	1437.30581145296	-0.0406496764799232	0.270788642779281	13.3080713724005	0.00128881036186637	0.0174095189852398
ENSG00000107159	186.818439448091	0.182471069715467	0.370669376701239	13.3028894283039	0.00129215396320788	0.0174422352023602
ENSG00000123892	1738.61935612528	0.469430865774362	0.361326810055804	13.2990826158762	0.00129461579928447	0.0174630106924152
ENSG00000156475	42.6058949352173	0.00692669201939684	0.615570692457198	13.2923655435163	0.00129897112294765	0.0175092795596754
ENSG00000183421	4416.60734269384	0.762448820934646	0.240039358109393	13.2845845549648	0.00130403460600501	0.0175650212944091
ENSG00000239605	5.48268220390846	-5.39571313659993	1.76660701065994	13.2825010561595	0.0013053937911191	0.0175708232552838
ENSG00000138378	56.7291442009944	0.282995219497198	0.478016811180642	13.2728914296042	0.00131168105701277	0.0176429026325279
ENSG00000241859	9.07138008479348	5.97276610477675	1.71350260112469	13.2440520489301	0.00133073211676491	0.0178864384302386
ENSG00000182118	321.499195334178	-0.197061552264929	0.322241153348331	13.2372828935009	0.00133524371364974	0.0179216221849796
ENSG00000167081	227.265995071321	-0.904832145555211	0.338164485023021	13.237340648601	0.00133520515563925	0.0179216221849796
ENSG00000244649	5.96722050502508	-3.18174661313931	1.55473758407139	13.2351910596675	0.00133664099823215	0.0179276618650201
ENSG00000110080	831.739649115288	0.294487109470721	0.269561199792117	13.2332485158987	0.00133793987073034	0.0179323739756173
ENSG00000112039	172.818718677183	0.829297871911962	0.355671138320484	13.2220032195288	0.00134548382454053	0.0180079783447168
ENSG00000229563	8.56894986180312	-1.22882630731937	0.996908280904907	13.2227181132099	0.00134500297154326	0.0180079783447168
ENSG00000074211	1659.39147124831	0.614549308621578	0.299193424594415	13.2123488096605	0.00135199445212142	0.0180823286264296
ENSG00000232187	86.3274490459628	-0.230168048064028	0.378337125288833	13.2104077533741	0.00135330723773133	0.0180871041483513
ENSG00000198223	27.5931068418743	-0.643973169863024	1.21434795985423	13.2055952160033	0.00135656757961537	0.0181051068012842
ENSG00000204175	85.2759661383808	-0.276666243458611	0.435632085405516	13.206894988409	0.00135568625147463	0.0181051068012842
ENSG00000072195	528.930678304689	-1.64792946042691	0.468361895850933	13.2016650398277	0.00135923597536399	0.0181279357531808
ENSG00000148143	652.067721467242	-0.696542100202416	0.20053597087149	13.199030149602	0.00136102787426204	0.0181390510707107
ENSG00000249721	3.18897015338556	5.67931112192419	2.01542932712102	13.1840524640598	0.00137125865857284	0.0182625405443287
ENSG00000109906	89.3496777917279	-1.34679395433021	0.611123634751586	13.1747766782658	0.00137763318011308	0.0183345344118425
ENSG00000147454	795.245703169519	-0.431652412440341	0.264806495016421	13.1623221789501	0.00138623881276455	0.0184360994599924
ENSG00000150764	600.640902264046	-0.473542686580042	0.337328838844824	13.1366588646704	0.00140414116672123	0.0186610755478927
ENSG00000159921	990.832681149934	0.823217782936141	0.457835726034021	13.1338184190743	0.00140613677678789	0.0186744831583936
ENSG00000156006	5.26540714739676	1.52625049391105	1.04178108517648	13.1303569235649	0.00140857255210546	0.0186937135684402
ENSG00000013375	810.866646830776	0.487568858372644	0.183466529369481	13.1275821330785	0.00141052815524751	0.0187065489404759
ENSG00000251076	105.711817556183	-5.28019219763127	1.27644830518105	13.0743795132837	0.00144855357247837	0.0191973924083705
ENSG00000164651	3.87039187048576	-4.94892433085347	1.79284825508636	13.0647891780999	0.00145551631002939	0.0192761694662745
ENSG00000171889	39.573242266789	0.408073291157883	0.489721853746872	13.0633877648712	0.00145653655734044	0.0192761918515159
ENSG00000130545	550.811165348878	0.863595843102331	0.271405381655622	13.0605368192097	0.00145861429115467	0.0192901994829505
ENSG00000137198	8.28869361218385	-4.69585038936639	1.39053696134359	13.0221138274748	0.00148690735946503	0.0196095622145475
ENSG00000271550	14.6978526946258	-0.863823682579428	0.76777468271042	13.022558061854	0.00148657712845744	0.0196095622145475
ENSG00000198455	502.451729018422	-0.805293419213045	0.380205904653456	13.0231254699374	0.00148615544033796	0.0196095622145475
ENSG00000149043	1537.88332958263	1.56747717665741	0.94866772669169	13.0233067160998	0.00148602076645517	0.0196095622145475
ENSG00000160710	8449.40320424483	-0.564666299065749	0.18899197939576	13.013070593292	0.00149364580805637	0.0196847123380688
ENSG00000144619	4.33447789422193	6.033739454433	1.87811804481905	13.0095965091474	0.00149624258837152	0.0196915097252649
ENSG00000250073	8.2903503060214	6.48125755104385	1.72298236967076	13.0105615178328	0.00149552081896731	0.0196915097252649
ENSG00000139209	27.1671051893096	2.29829961974156	0.677724605991219	12.9989850413928	0.00150420235087924	0.0197687704794372
ENSG00000142046	370.136321775743	-1.13725246961296	0.428011502785962	12.9992314025228	0.00150401707379529	0.0197687704794372
ENSG00000079156	286.106745918374	-0.0544060982806129	0.569650616340536	12.9859102346869	0.00151406814156128	0.0198846214982979
ENSG00000167768	1350.79137565956	-3.39408165373443	2.20988554901897	12.9808587367839	0.00151789713107988	0.0199181152192062
ENSG00000214013	669.706562704477	-0.771004133210076	0.213188601116911	12.9797703366874	0.00151872339557805	0.0199181152192062
ENSG00000271303	206.234606089056	0.713587037217322	0.2838187956651	12.956297147401	0.00153665304716	0.0201393067295728
ENSG00000131386	20.9028274424688	-2.5581846333533	0.797698124636915	12.9306178405425	0.00155651034735278	0.0203713404727879
ENSG00000130584	103.157068428361	0.201076501230518	0.36698123627896	12.9308354600962	0.00155634099302307	0.0203713404727879
ENSG00000198074	4129.55733946407	-0.183210347899051	0.438307022668605	12.928050466969	0.0015585097021172	0.0203834112733711
ENSG00000265787	5.17802064390998	0.836066935023507	1.16583799266257	12.9204656962416	0.00156443139307047	0.0204326184360654
ENSG00000160213	21097.5565144472	1.78927521273124	0.565842336972429	12.9213954870433	0.00156370426514322	0.0204326184360654
ENSG00000078401	288.121066466466	-0.896794265210902	0.270281045672353	12.9138014149357	0.00156965299323583	0.0204866778599917
ENSG00000132854	545.091209943964	-0.636088537002325	0.521342427613997	12.9040484725178	0.00157732605439086	0.0205626097687474
ENSG00000178363	404.874550676891	-0.302949238140648	0.346446477093416	12.9022686538168	0.0015787303563535	0.0205626097687474
ENSG00000197930	7541.59809790523	0.504547477859723	0.375585644520356	12.9031405735683	0.0015780422432693	0.0205626097687474
ENSG00000158887	11.2082802114433	1.69198682089609	0.726693232659459	12.8940555372415	0.00158522683453595	0.0206330246517145
ENSG00000131015	418.497983124438	0.563675428324465	0.239309124292368	12.8821000605772	0.00159473128500667	0.020742467057561
ENSG00000002079	56.4890012028916	-0.545399366054558	0.635707484882363	12.8779953188163	0.00159800762604155	0.0207708065404095
ENSG00000233517	5.99476913623861	5.22747183796945	1.56559966376768	12.8765354546249	0.00159917448891057	0.0207717070711273
ENSG00000114200	16.0219624335258	4.05815938128362	1.61473455556902	12.8692436946448	0.00160501552857489	0.020808497787548
ENSG00000255501	11.9462323746995	-1.79622700189622	1.42852133113795	12.8688823836653	0.00160530550963382	0.020808497787548
ENSG00000119638	1599.58837447032	-0.479983453300645	0.190155187517154	12.8710503445457	0.00160356633264806	0.020808497787548
ENSG00000091622	1635.5900946272	0.533535173819605	0.202324186999563	12.8659305570077	0.0016076765507275	0.0208249683247898
ENSG00000227096	14.3554497590919	-3.60992694643728	1.03774828944252	12.8617992914041	0.00161100085235659	0.0208537559034532
ENSG00000129824	2555.85491690412	5.22014232370082	1.30802198604422	12.857115112721	0.00161477838221151	0.0208883669742671
ENSG00000137269	1160.81765547426	0.217428948145467	0.166352322342196	12.8343599503014	0.00163325556791019	0.021112951928074
ENSG00000119787	2864.61096276876	0.779159846286417	0.216323873976658	12.8303368709248	0.00163654423283723	0.0211410236221464
ENSG00000262714	23.6864407881803	-1.62657655419996	0.621649262234158	12.8150779037481	0.00164907797238539	0.021288404247881
ENSG00000137509	1067.61266023272	0.952865318301572	0.309715282304434	12.8027596389002	0.00165926620512456	0.0214053257886723
ENSG00000265190	6352.17492037473	-0.0277635433492738	0.189244833950719	12.7994471682678	0.00166201661744876	0.0214116163956554
ENSG00000203880	370.357241805932	0.20319826443144	0.24011066788002	12.8007824866592	0.00166090732712584	0.0214116163956554
ENSG00000186665	230.269026207537	0.918185087613826	0.354171632738733	12.7795143147066	0.00167866380305659	0.0216113690291469
ENSG00000172965	349.134355196344	0.0613533089167667	0.26246766463937	12.7723837484135	0.00168465939646546	0.0216738131054445
ENSG00000233461	103.214974630945	-0.628119026146744	0.333995752589973	12.7607822102179	0.00169446011500345	0.0217527349707741
ENSG00000144366	76.7563961807945	0.760117751191696	0.376486142276657	12.7625655265787	0.0016929499091743	0.0217527349707741
ENSG00000196428	2620.43590994011	-0.722127892632604	0.206517461685289	12.7622834728359	0.00169318867743939	0.0217527349707741
ENSG00000171462	138.105932857513	-0.580606732000976	0.53532298220361	12.7596831862036	0.00169539149706165	0.0217527349707741
ENSG00000145990	1336.74813463488	0.295710346926489	0.181651511567904	12.7409476584179	0.00171134814668568	0.0219425905664136
ENSG00000213516	438.452692846043	0.410196102530851	0.222053975891124	12.7311640915157	0.00171974020054897	0.022035262894644
ENSG00000167996	24542.6411768391	-0.0836666329785299	0.303548167053578	12.7283754921929	0.00172213970615448	0.0220510784431485
ENSG00000171729	1115.672932452	-0.625352633428349	0.203727040595203	12.7141412841135	0.00173444007318902	0.0221813241422317
ENSG00000278599	31.8663226703748	-0.603430527116802	0.665199752137789	12.7138926211185	0.00173465573212697	0.0221813241422317
ENSG00000179299	82.5504804644843	2.1131072850157	0.594952128280461	12.6993721448378	0.00174729557444485	0.0223130174321589
ENSG00000105131	472.386986035499	2.29274146305004	0.660218769825239	12.6993526038479	0.00174731264647078	0.0223130174321589
ENSG00000228318	14.484721618441	-4.0787788822477	1.21718332911749	12.6628434190313	0.00177950203485653	0.0227087498379365
ENSG00000081181	54.8509278731218	1.47856897355648	0.757465029960037	12.6555440964511	0.001786008480488	0.0227764221652529
ENSG00000168427	10.4440214981427	1.29722566547861	0.758316580227709	12.6528699400647	0.00178839811068534	0.0227782843916673
ENSG00000234409	7.3080850236823	-1.77733208131231	1.06949126739599	12.6526869777397	0.00178856172290714	0.0227782843916673
ENSG00000001036	647.403073755283	-0.716015316248052	0.2498483286789	12.6492705692996	0.00179161956255371	0.0228018831347202
ENSG00000204323	342.382638155811	1.40480249166544	0.439890160835922	12.6443488280763	0.0017960339358555	0.0228427031156353
ENSG00000079215	187.365815927953	1.34278352957943	0.599458379874813	12.6386917276368	0.00180112129957949	0.0228920218902229
ENSG00000171517	902.655590004275	0.00454449677870158	0.365507447675931	12.6315448497986	0.00180756900991781	0.0229585526930836
ENSG00000167468	2444.80376528872	0.15511682733594	0.205567675712046	12.6277585009611	0.00181099429463519	0.0229866311374722
ENSG00000187210	347.128242358471	0.9004811022491	0.523060631966525	12.6198872406781	0.00181813574219741	0.0230618089283418
ENSG00000258955	45.45222098476	0.930771914206946	0.438986693215715	12.6179727370733	0.00181987698918654	0.0230684340390859
ENSG00000109163	22.2670521738365	2.98209540244128	0.821023360383537	12.6145014320936	0.00182303840598094	0.0230930400489888
ENSG00000067057	5450.24238415018	-0.335915271666796	0.219085743402882	12.613014977842	0.0018243938412113	0.0230947514681765
ENSG00000150556	177.673094889179	0.860086553333097	0.379320349193721	12.6076381033221	0.00182930520858421	0.0231414445671499
ENSG00000082458	909.722283237247	0.645870123156891	0.300006663571418	12.6059260271577	0.00183087183395655	0.0231457912208601
ENSG00000151693	1582.62802471985	-0.756802821771191	0.254375965314732	12.6020203404504	0.00183445073322636	0.0231755541564145
ENSG00000101187	437.103535542535	0.724374263754275	0.383201573716764	12.5981646125867	0.00183799071583566	0.0232047860554969
ENSG00000198363	5481.41063017058	0.0669655371570388	0.309695093827144	12.5954595949153	0.0018404782963769	0.0232207011726219
ENSG00000114013	90.9311494148851	-2.23248612083791	0.619564292744643	12.5804733279421	0.00185432104393941	0.0233797639950389
ENSG00000185345	39.1965375500982	0.701459938983912	0.489169143629897	12.5502004806168	0.00188260233168205	0.0236942550085647
ENSG00000135063	21.5920417388658	1.27656584503178	0.613944625728071	12.5503818986399	0.00188243157043032	0.0236942550085647
ENSG00000137747	744.800994945025	0.448580112417449	0.347315015835015	12.5497564774472	0.00188302031877841	0.0236942550085647
ENSG00000050730	12.767797291032	2.60987194403232	1.16407140598981	12.5467332130267	0.00188586890541003	0.023714331584641
ENSG00000186472	128.249034578492	-1.780770553162	0.588016042801908	12.5392504960294	0.00189293783251617	0.0237874159896206
ENSG00000138735	125.046505831247	-0.557670295791452	0.383047171599624	12.5340840112357	0.00189783407114255	0.0238331186439103
ENSG00000154764	494.659136047032	0.752016514618199	0.388693175305931	12.5312791793337	0.00190049749109102	0.0238349337434709
ENSG00000122042	1835.99284137011	0.816845264960386	0.246490650903761	12.5324767691787	0.00189935982349195	0.0238349337434709
ENSG00000196227	428.607573921907	0.916398980081163	0.257498751300016	12.513607766317	0.0019173641337634	0.024030540550644
ENSG00000147003	11.5354174352416	-2.37188292492313	0.892440505484276	12.5088198662132	0.00192195970632173	0.024072195527557
ENSG00000144746	4536.12955896315	-0.0599816138582996	0.270663215142651	12.50660657821	0.00192408780881073	0.0240829112313115
ENSG00000234465	58.1040565683445	1.37858801296155	0.78175962734429	12.5052116139935	0.00192543029375728	0.0240837860603811
ENSG00000112293	26.4534301583301	0.48315337331093	0.915917968848081	12.5032143899177	0.00192735401199097	0.0240919251498872
ENSG00000271601	343.546943873225	0.137501403888893	0.338867196708589	12.496596237923	0.00193374233678732	0.024155824240066
ENSG00000171450	6.00517657468512	-2.40250462781367	1.46079656614446	12.4878941195021	0.00194217449529995	0.0242451532477253
ENSG00000109193	132.06835437308	1.15207237073478	0.62096823680121	12.4785715084188	0.00195124869641958	0.0243423741461704
ENSG00000006534	744.314212108634	-0.688916038740637	0.326208347555466	12.4729405615713	0.00195675012619803	0.024394924992291
ENSG00000082512	56.3453382406547	-1.41217011602275	0.517967506396943	12.4654991347424	0.00196404419379412	0.024456476132114
ENSG00000067646	246.204481949148	6.64147537459106	1.64493282330512	12.46526738024	0.00196427179502316	0.024456476132114
ENSG00000120306	320.312948117421	0.191182433776066	0.293040344895441	12.4600873489276	0.00196936588376246	0.0244876802563762
ENSG00000131668	5.10449048073047	6.26917053095242	1.91878173855978	12.4601237656667	0.00196933002514713	0.0244876802563762
ENSG00000205542	24654.906518263	-0.34856841604266	0.154939567388728	12.4570609673416	0.00197234816589768	0.0245086599078225
ENSG00000004399	66.042040827223	-1.62563244086827	0.477866691925353	12.4509857747103	0.00197834847205978	0.0245590350522779
ENSG00000231863	7.276088623215	0.0284339776076491	1.04315411359901	12.4503297102831	0.00197899754054023	0.0245590350522779
ENSG00000196352	4598.60574379875	0.97469570371269	0.277289765378584	12.447198126186	0.00198209866637879	0.0245814005643635
ENSG00000161542	976.025327868784	0.262323074728087	0.185501659483828	12.4438151081392	0.00198545424135079	0.0246068903192952
ENSG00000117335	8898.36753490473	0.505246055945313	0.176908000338658	12.4366355183923	0.001992594423034	0.0246792208481141
ENSG00000271447	18.9254663657066	-0.0555761133478379	0.68240392987996	12.4267558919595	0.00200246181878063	0.0247852125051821
ENSG00000203805	7.66035404596819	-0.696334791683098	0.95857966780834	12.4229383661157	0.00200628769383552	0.0248163363436844
ENSG00000132031	25.1601825600815	-0.268316255620988	0.478253462234502	12.4204967897776	0.00200873844173348	0.0248304212996775
ENSG00000069011	16507.1757091117	0.708760260629599	0.31663934899923	12.4163840137625	0.00201287343749603	0.0248652936061438
ENSG00000047457	128.950978262038	1.63937343064035	1.61397343490974	12.4125925821404	0.00201669289265407	0.0248962250446695
ENSG00000135838	552.754247719806	0.937306722421632	0.382267240613647	12.3999895095981	0.00202944128109511	0.0250209617229478
ENSG00000167123	663.028372356895	-0.470992137436229	0.354753920649397	12.4005264844943	0.00202889647472458	0.0250209617229478
ENSG00000277586	418.321965276654	-0.549005620837823	0.582148111602026	12.3925488720884	0.00203700551150469	0.0250978706414233
ENSG00000269927	9.15929590563773	-2.25164360439069	0.952242653149358	12.389245083244	0.00204037321032278	0.0251230078109034
ENSG00000114166	716.885560755388	1.12386076659895	0.315836502710884	12.3874098683821	0.00204224633120586	0.0251297215982256
ENSG00000163064	4.35118133981554	-5.93482748457956	1.74927820158287	12.3842275144958	0.00204549849317669	0.0251533846545607
ENSG00000169710	9120.7559567171	-0.613860952096533	0.218417799585759	12.3689579756135	0.00206117517032313	0.0253297013625748
ENSG00000182463	123.875821860049	1.23517970103672	0.364867295156939	12.3529015482152	0.00207778932682642	0.0255173024076509
ENSG00000159208	107.512112206631	0.565861995558093	0.462393314874202	12.3452199428924	0.00208578505077235	0.0255988859182015
ENSG00000155966	9.15752829834961	2.32457755314972	1.54785526809239	12.3381323640316	0.00209318974638118	0.0256731146793673
ENSG00000106804	31.8692477507659	-0.5347123545723	0.504419804768798	12.3258615667624	0.00210607177768174	0.0258143836739812
ENSG00000176920	1666.5096966446	0.82315914801955	0.236840894721012	12.3187910106357	0.00211353050360387	0.0258890386930118
ENSG00000160293	1757.87308321926	0.180166249365956	0.288063548427916	12.3091239810722	0.0021237710134252	0.0259976496953894
ENSG00000164093	181.186877234446	-1.73896081436709	1.47515021630551	12.3069119881098	0.00212612119610028	0.0260095951106643
ENSG00000152377	304.702720599792	-0.143929585318118	0.465170140460179	12.3051641796158	0.00212798003454823	0.0260155181872256
ENSG00000203616	5.53437857656362	0.731843180773786	0.995345524823581	12.3013911597008	0.00213199827911029	0.0260478162893236
ENSG00000184995	17.3498403892071	-0.258850454010889	0.717607689847119	12.2958680857666	0.00213789400806178	0.026086166410425
ENSG00000224945	17.5819574699598	0.866095844906187	0.662108931766018	12.2959410192724	0.00213781604743073	0.026086166410425
ENSG00000283000	209.806001561729	0.0730320031704971	0.50262886726727	12.2894175779443	0.0021448003905046	0.0261520178558227
ENSG00000105767	763.983110580279	1.01690379348028	0.294604238626619	12.2882483638932	0.00214605462246196	0.0261520178558227
ENSG00000127423	62.6836601901705	-0.205170249599509	0.731462472774817	12.2846324416469	0.00214993811533177	0.0261656455515458
ENSG00000272763	24.9039226613962	-4.67424270131761	2.07817636802128	12.2854720319154	0.00214903577118509	0.0261656455515458
ENSG00000101333	37.1191745865351	-0.330515887869503	0.524054852548218	12.2681426174925	0.00216773744217555	0.0263653156125786
ENSG00000179046	15.3662420188636	-4.53116752199937	1.24834249145743	12.2619716493269	0.00217443629083003	0.0264298052690805
ENSG00000173193	3375.80612777211	-0.730515745044895	0.207749251617567	12.2425168994333	0.00219569105687137	0.0266618385377941
ENSG00000126458	1595.83175251611	-0.0987939040591238	0.221976869315298	12.2419224268987	0.00219634379288883	0.0266618385377941
ENSG00000262655	8.27331594166386	-4.43327424813161	1.38021970216096	12.2313587106598	0.00220797526002276	0.0267858537153402
ENSG00000206538	487.623087139983	-1.33674036791554	0.52483345793914	12.223811230546	0.00221632332651549	0.026869903237864
ENSG00000143845	486.102487811432	0.416263637845041	0.241875519632239	12.2179358415869	0.00222284378017777	0.0269317020101564
ENSG00000111077	98.3856119879468	-0.579323134958488	0.345446673315527	12.2144593028632	0.0022267110416142	0.0269612965211444
ENSG00000169895	2101.51263498645	-0.343763370247137	0.219181173026472	12.2040286003965	0.00223835445765188	0.0270849476413439
ENSG00000011465	285.582765105393	-2.13505712812369	0.629727921822238	12.1961139743078	0.00224722987676826	0.0271576152093482
ENSG00000279741	5.55784101338434	-2.60794946663954	1.41208604278021	12.1961640869727	0.00224717357013481	0.0271576152093482
ENSG00000148655	14.4676075821226	0.585611159290155	0.765851217923041	12.1913421464186	0.00225259797523193	0.0272051159420959
ENSG00000141579	1886.4515099041	0.657172970701112	0.265345453367852	12.1748534390917	0.00227124595424419	0.027412837808719
ENSG00000173273	103.103993220659	0.550682970786121	0.314173011573172	12.1362487636368	0.00231551215692804	0.0279292973676629
ENSG00000185306	29.2311638294825	0.486285730796002	0.510529952056954	12.1334216722765	0.00231878755355079	0.0279509900961457
ENSG00000196711	18.3227736653784	1.23482652725907	0.910430795561925	12.1300125765751	0.00232274340840561	0.0279808523259555
ENSG00000246090	141.677862399032	-0.928912767360837	0.421003361792392	12.1178537892121	0.00233690729028985	0.0281289697999113
ENSG00000125355	12.0797048329862	1.76772213377204	0.982654361151785	12.1169089104483	0.00233801159816436	0.0281289697999113
ENSG00000095752	208.250433625919	-2.07042388195871	0.700882010859047	12.1037616118916	0.00235343149338278	0.0282965000077949
ENSG00000133056	746.608092318932	-0.0431174415099946	0.304295440620403	12.0987245078793	0.00235936620329257	0.0283498446967059
ENSG00000175567	54.327477564183	-0.637195948052626	0.581125401447532	12.0927409006928	0.00236643553332782	0.028416746489993
ENSG00000214063	358.341462446915	-0.537827611826018	0.318749533895315	12.0799490681705	0.00238161956296542	0.0285809449772483
ENSG00000277013	35.4272270314605	2.17824315598047	0.778763844810467	12.0760136850623	0.00238631046927941	0.0286009662008314
ENSG00000237659	7.96072780186547	5.50734894709742	1.76246114353775	12.0771106975478	0.00238500192199577	0.0286009662008314
ENSG00000260855	3.16718821973366	-5.47645842839417	1.68515581584103	12.0709831909916	0.00239232018440336	0.0286367232699769
ENSG00000162980	1022.98064370834	0.457148104364062	0.179944367199458	12.0717007249728	0.0023914620528341	0.0286367232699769
ENSG00000198833	1805.99070020264	0.610903018422547	0.195304247018931	12.0668314332658	0.00239729150945655	0.0286780921722283
ENSG00000147689	25138.3734565045	-0.578469670126571	0.234309662974745	12.0618746585576	0.00240324029507017	0.0287310944941269
ENSG00000239713	73.7950252143897	-1.10712775300341	0.672916560566522	12.058433123857	0.0024073792725922	0.0287624070289188
ENSG00000249242	17.5644446929588	2.12745917988054	0.830659698882166	12.0529350844738	0.00241400631037296	0.0288058327621825
ENSG00000227640	207.331763930472	1.32682722343629	0.502553416526572	12.0528921239843	0.0024140581643763	0.0288058327621825
ENSG00000087510	948.195856050406	0.504072816960048	0.255090240430231	12.0477336441474	0.00242029263620237	0.0288620278135664
ENSG00000164509	42.0054512494306	2.33163995981202	0.826903216196408	12.0392093940878	0.00243063024045829	0.0289400756435097
ENSG00000134508	201.336024707514	0.40142869850097	0.437995083846573	12.0396889892762	0.00243004745105283	0.0289400756435097
ENSG00000154620	7.24182786672722	6.08678903086328	1.71793437296606	12.0385554541377	0.0024314251135102	0.0289400756435097
ENSG00000148154	4315.71947580173	-0.639604399045781	0.289116741744552	12.0347641072759	0.00243603867301655	0.0289767642280567
ENSG00000251152	35.9221985326778	1.77254790281893	0.524083984589851	12.030182267652	0.00244162583970708	0.0290249805379752
ENSG00000001461	2888.33667598834	0.107798274382262	0.186687058691768	12.0275582314416	0.00244483139943119	0.0290274921071116
ENSG00000171798	15.8919090407162	1.06029374867875	1.19961522687262	12.0274982266587	0.00244490475132026	0.0290274921071116
ENSG00000163002	211.584622676385	-0.040208967186583	0.215716217860637	12.0223784360286	0.00245117146918759	0.0290836489369124
ENSG00000136457	39.1172929932301	-2.47394792805058	0.688255746570437	12.0203425594389	0.00245366788087425	0.0290950279733993
ENSG00000109089	1172.58851796102	-0.988835962599043	0.322323464058526	12.0173288547251	0.00245736798315739	0.0291206569074851
ENSG00000197329	1747.64360813304	0.97790709298701	0.28424931092049	12.0139859010452	0.00246147885148202	0.0291511184382336
ENSG00000162402	2039.4588303487	-0.411816544600261	0.200807627336221	12.0105670448474	0.00246569017104408	0.0291626509088402
ENSG00000072201	561.970617530021	1.55007284726112	0.445760587531951	12.010666541124	0.00246556751059953	0.0291626509088402
ENSG00000102038	1112.07043636523	0.11338725365274	0.368652071410721	12.0094436644006	0.00246707551413755	0.0291626509088402
ENSG00000160094	366.554050522565	0.297548000155003	0.237423200461707	12.0052561270768	0.0024722464109774	0.0291860915178097
ENSG00000136280	889.927034932394	0.38576062820878	0.20874265321488	12.0028460876161	0.00247522731234265	0.0291860915178097
ENSG00000233539	13.0358466420949	-1.18556896056348	0.779709215442157	12.0062700766932	0.00247099336198638	0.0291860915178097
ENSG00000105559	153.092072755926	-1.222375246471	0.50790116998836	12.0035991906841	0.00247429543716177	0.0291860915178097
ENSG00000116032	413.31613660368	-0.257134523490759	0.509070739247412	11.9963608572403	0.00248326654905065	0.0292626522047221
ENSG00000234964	2950.92662321797	-0.0604569733239026	0.204564417246468	11.9950847914334	0.00248485146037593	0.0292631075840787
ENSG00000150540	160.265949051682	-1.91676597033659	0.561091791253891	11.9898678958603	0.00249134152648709	0.0293179709230681
ENSG00000154978	1151.51755003174	-0.388998596545844	0.284611250002	11.9888510804111	0.00249260846579744	0.0293179709230681
ENSG00000127329	19.4584050791789	-1.73997201398453	0.786123543629214	11.9869880683847	0.00249493142733023	0.0293270666224998
ENSG00000130508	2151.08693994125	0.0825614424411862	0.56333266826374	11.9818020840387	0.00250140915971857	0.0293849586267374
ENSG00000271369	39.8666474754446	1.59118509288711	0.945572726201164	11.9760471621001	0.00250861723244449	0.029451353054598
ENSG00000157184	504.828650370414	0.582553340063978	0.209825441961683	11.969808339575	0.00251645485932806	0.0295250515888305
ENSG00000233070	5.55528747897574	4.0472404983212	1.82196619553496	11.9675955317075	0.0025192406156853	0.0295394229565331
ENSG00000184895	3.19350087606565	-0.0167937497263126	2.39389307986913	11.9624735511283	0.00252570063493172	0.0295968325176984
ENSG00000185950	610.322441269462	0.0938384918586078	0.287804048110556	11.9574145605584	0.00253209746974998	0.0296534310736499
ENSG00000198682	95.4057363050469	0.920680268734697	0.557237388738968	11.9448635286889	0.00254803765189011	0.0298216527903651
ENSG00000198742	2310.01121557615	-0.523422203867275	0.196119217238762	11.943099883548	0.0025502855599843	0.0298295143527212
ENSG00000185352	4.94058240372423	-4.82174559954156	1.65896670459458	11.9320232642017	0.00256444901576981	0.0299766507865619
ENSG00000166578	68.7276540345253	1.07448641416652	0.5042536125974	11.9286597655085	0.00256876540475125	0.0300085711635293
ENSG00000164626	88.459845651429	-2.88156558050128	0.892326028181025	11.9244895686119	0.00257412712142178	0.0300526562448533
ENSG00000185043	2509.68367722312	0.264904040706961	0.221424919587406	11.9186809805203	0.00258161401029438	0.0301214828266468
ENSG00000164976	880.124018491037	-0.253365685574636	0.264082200988433	11.9167824258914	0.00258406584145874	0.0301315132776381
ENSG00000181826	319.980671996937	0.583742572312487	0.272202597406282	11.9109784298049	0.00259157568698237	0.0302004740616634
ENSG00000162772	577.786906488408	-0.953312291051954	0.416738669103307	11.9059555777276	0.0025980924173618	0.0302205894275182
ENSG00000171124	3749.00862077009	0.66527743854428	0.275226188887685	11.9071318552822	0.00259656482772557	0.0302205894275182
ENSG00000125648	1721.87382523703	1.06143440739883	0.322705094009976	11.9076218474557	0.00259592875742434	0.0302205894275182
ENSG00000136161	319.488165468605	0.830824387822113	0.292924810399205	11.9043726816572	0.00260014948642507	0.0302259392079818
ENSG00000049246	282.581257473408	0.784926197762809	0.283614710624494	11.9026877198556	0.00260234098572516	0.0302328441711778
ENSG00000102226	551.05218774173	0.0251919608398532	0.198470817662566	11.8988219455747	0.00260737588152655	0.030272753716497
ENSG00000177076	196.358355945909	-0.745436279420994	0.318899878962471	11.892913584134	0.00261508992982269	0.0303437013622896
ENSG00000264268	20.0977779181622	-1.95953494334304	0.847930923106042	11.8862810030491	0.00262377672382979	0.0304258422172051
ENSG00000197256	324.775389924031	-0.0900501297240763	0.345440769601245	11.8741471893421	0.0026397433177627	0.0305922487989339
ENSG00000135899	1073.34985363685	-0.542954167333208	0.275556252543011	11.8677337073024	0.00264822187794949	0.0306717252387968
ENSG00000162896	769.192599829757	1.13277392653768	1.45447623242659	11.8645100908288	0.00265249374557616	0.0307024123150024
ENSG00000130396	4819.60817028103	0.40159210954785	0.15543919724857	11.8610193482251	0.00265712737456321	0.0307372466770225
ENSG00000116285	3350.08231460742	-0.827173573729758	0.238712667988069	11.8567013364315	0.00266287032553511	0.0307848631098057
ENSG00000182040	63.511800391499	1.74535664802934	0.526966639963197	11.8475376081815	0.00267509922974404	0.0308977516400477
ENSG00000266010	5.55144538728366	-1.42011928444034	1.32021332132709	11.8463625445236	0.00267667139749124	0.0308977516400477
ENSG00000133477	2100.93294685266	-0.517360474501576	0.167164179618094	11.8457188353423	0.0026775330351217	0.0308977516400477
ENSG00000109323	747.001212256913	-0.573844848595531	0.32888755974701	11.8344884149693	0.00269261023710825	0.0310528023993136
ENSG00000162511	12.7449322206363	0.684183140700392	0.988231006276922	11.8191388146454	0.00271335498666931	0.031272986067428
ENSG00000261804	21.0332340318027	-1.67233281740062	0.73013615751379	11.8123064274996	0.00272264018352042	0.0313609041224126
ENSG00000231062	18.605359362854	4.22680697724727	1.17284973481243	11.7991903628166	0.00274055402145979	0.0315480443163787
ENSG00000226281	25.5699187102368	1.11605776405509	0.595025371150643	11.7959065423828	0.00274505746121763	0.0315806762635524
ENSG00000183770	10.332044526245	-2.01804743130234	1.0395245361362	11.7886842601046	0.00275498817095065	0.031656436633419
ENSG00000233369	767.157930109157	0.193264328045481	0.243411446548029	11.7896261070354	0.00275369108781143	0.031656436633419
ENSG00000084676	790.141986543215	1.02104717866439	0.321174447791124	11.7744828056713	0.00277462020882281	0.0318626744247401
ENSG00000114268	521.086672014846	-1.0381244438763	0.338668871324839	11.7717485736191	0.00277841603064977	0.0318869153305317
ENSG00000006756	1187.76529474094	-0.391282453037556	0.29778360011622	11.7663671716081	0.002785901984172	0.0319534515457304
ENSG00000172889	144.653737330983	1.02178909450092	0.45597838641855	11.7524068070898	0.00280541611463924	0.0321383171728496
ENSG00000087460	16455.4944946747	0.220292977314115	0.196632025481519	11.7531642279572	0.00280435387543896	0.0321383171728496
ENSG00000019186	336.101337154177	4.41239968741517	1.32399716812431	11.7499381431653	0.00280888106742797	0.0321585445862519
ENSG00000109101	75.0885380556914	1.08039010180016	0.545740190416388	11.7371035913935	0.00282696439295479	0.0323460103607432
ENSG00000215595	23.1723348370337	-1.40526571639292	0.670640882413979	11.7309375955975	0.0028356933670263	0.0324262821576875
ENSG00000189143	12674.4048055958	-0.129761471079513	0.277028916317664	11.7262019627765	0.00284241572382859	0.0324835251047439
ENSG00000168564	1241.6817488673	1.1118405077699	0.410711546437687	11.715977054755	0.00285698465325431	0.0326303165738309
ENSG00000134107	12187.3849030068	-0.091991150093879	0.182577627919256	11.6955172293773	0.00288636136119744	0.0329260932855103
ENSG00000230825	5.406036939748	4.66234188179055	1.49271646776883	11.6962182989536	0.00288534976843876	0.0329260932855103
ENSG00000086696	73.2994289741591	1.98700097152798	0.766319972285402	11.691500114213	0.0028921646103234	0.0329724188255243
ENSG00000182022	1334.64613656098	-0.163868482257648	0.350147393242866	11.6872930978607	0.00289825470526458	0.0330219568315064
ENSG00000130054	86.7006063813231	1.13997892093033	0.609628829174831	11.6819584985413	0.00290599553802467	0.0330902319838248
ENSG00000105926	304.730143131883	-0.519820030835987	0.253648068181276	11.6762579174258	0.00291429028527184	0.0331647285921645
ENSG00000259087	3.55849217854416	-5.77716413396501	1.90225034603578	11.6737333854179	0.00291797121749364	0.033186661833574
ENSG00000166482	69.1794089551168	-2.7636367364725	0.772623791385748	11.655138030005	0.00294522808988242	0.033476541502117
ENSG00000204634	2047.40938278146	-1.08743909184345	0.338963471537405	11.65339768373	0.00294779206363882	0.0334855731118636
ENSG00000181830	2492.95600965083	0.439548330337315	0.203676407301405	11.6327665308116	0.00297835761766944	0.0337922169750564
ENSG00000168010	1019.66180189916	-0.763591210029284	0.529708483712937	11.633549311844	0.00297719214483638	0.0337922169750564
ENSG00000196839	871.110254101038	0.25048467631307	0.233447132149129	11.6270173042212	0.00298693156155752	0.0338691910140659
ENSG00000112312	281.934996941992	-1.30918826101577	0.37953257504814	11.61960873492	0.00299801652454702	0.0339745285790732
ENSG00000065665	117.09627757648	-0.989720639765195	0.293969189329479	11.6179525822266	0.00300050013928751	0.0339823250365147
ENSG00000117115	33.7227517050086	0.380965650870585	0.657119782607032	11.611181061317	0.00301067633135694	0.0340771827577334
ENSG00000280587	27.8785038235761	-1.16055551946146	0.556555706295934	11.6039842624818	0.0030215294625538	0.0341795846257207
ENSG00000026297	235.088207206792	-0.709669927484227	0.322942128120782	11.5948882237747	0.0030353027338378	0.0343148770835606
ENSG00000111728	34.5489342173434	1.86398105915992	0.684710003274346	11.5869013831213	0.00304744820832444	0.0344316163239045
ENSG00000258590	4.15563567925634	-0.164248534422336	1.13643967433612	11.5802018133348	0.00305767362120075	0.0345265353706588
ENSG00000254607	19.6511255163078	1.01181807761446	0.949007020071098	11.5785031930152	0.00306027163757729	0.0345352657967503
ENSG00000233818	22.4592192097431	-0.694635838986331	0.621183221273407	11.5693787440053	0.0030742651804045	0.0346725080686264
ENSG00000253837	6.90145007835736	-1.12073120557076	1.36600766849755	11.5675657286924	0.0030770532888583	0.0346832837949037
ENSG00000276980	145.825581918944	-2.117341000903	1.19012917749336	11.5633740928758	0.00308350899487497	0.0347353617428623
ENSG00000188157	11535.706839866	-0.116970066200694	0.243084100002103	11.5578831802165	0.00309198626582624	0.0347919372576178
ENSG00000103490	482.761165015814	-0.426371079330266	0.349500559505941	11.5577396896355	0.00309220810923716	0.0347919372576178
ENSG00000268895	15.1799610588576	-1.04663463755576	0.76491180087955	11.5563184952324	0.00309440620455396	0.0347959818307686
ENSG00000110799	191.545793884316	2.46251331066831	0.689319418975802	11.5517360863498	0.00310150425022472	0.0348550878476857
ENSG00000236008	7.95587763411344	0.261074552297192	0.874993484728375	11.5479491694619	0.00310738238288004	0.0348797221803113
ENSG00000163032	862.657936050283	1.18044698114321	0.346234449619452	11.5482720254191	0.00310688080490868	0.0348797221803113
ENSG00000167178	8.21096289217767	1.09771451924844	0.894798796335824	11.5374283157548	0.00312377160998267	0.0350429032121648
ENSG00000187720	888.565437975472	-0.971100575755044	0.33096899792091	11.5322408516985	0.00313188435304877	0.0351130991596256
ENSG00000171612	182.695482400398	-0.26076771690576	0.302888117837222	11.5222614512731	0.0031475505694292	0.0352678475585835
ENSG00000153531	68.8831405428489	-1.31666204925256	0.553928504811381	11.5193416030236	0.0031521491103831	0.0352984745053256
ENSG00000175287	75.6989234228633	1.38433525002406	0.615825556224698	11.50648942571	0.0031724703230533	0.0355050271222849
ENSG00000137648	7294.49112629896	0.819941133798798	0.301418046961365	11.5027419936352	0.00317842020402873	0.0355505924120825
ENSG00000020181	51.2458728841598	-0.618338554581278	0.463177211175415	11.4942152117969	0.0031919999792397	0.0356813937431254
ENSG00000119862	1865.10624992862	0.404692027656099	0.288832743877348	11.4844915308708	0.00320755676054753	0.0358341273278406
ENSG00000134709	1448.76803236084	0.661459770160797	0.233076352265927	11.4765412911764	0.00322033255892909	0.035955630488338
ENSG00000136877	951.991234492187	-0.236376292669955	0.185848995100751	11.4704714556511	0.00323012084922889	0.0360436539337599
ENSG00000186350	4641.79858018058	0.151389129443589	0.160862721605334	11.4654347597856	0.00323826566883232	0.0361132455996769
ENSG00000108576	6.83973506880051	2.56297557159988	1.02247274478005	11.462478471303	0.00324305583198637	0.0361453660897186
ENSG00000134955	1521.4263627296	-0.278580843143008	0.202317123446351	11.4600558166248	0.00324698661442921	0.0361678762084007
ENSG00000179111	14.3547376522067	-0.767178162661653	0.750917109193225	11.4561548461237	0.00325332599435322	0.036217173201844
ENSG00000160190	790.427534954631	0.256160868844958	0.235134726417822	11.4525680540571	0.00325916573120184	0.0362608532998206
ENSG00000238837	11.2586305996269	2.77764582385137	0.837270201411322	11.4456190484835	0.00327050940702227	0.0363656818612787
ENSG00000235859	124.362285625029	0.901039065241523	0.277688524748874	11.4440938921543	0.00327300437726717	0.0363720539282332
ENSG00000168412	4.96696875302079	3.50815391019959	1.55370335496283	11.43817123628	0.00328271118199026	0.0364237462316406
ENSG00000170962	74.9436540773693	2.16202488302825	0.639010870274082	11.437733396585	0.00328342991129082	0.0364237462316406
ENSG00000149451	69.5806149963967	-2.83710551050703	0.885566426454421	11.4379690170221	0.00328304311248026	0.0364237462316406
ENSG00000258766	5.29784349419772	4.1183269608415	1.81489864876588	11.4327793139539	0.00329157318428597	0.036471324656096
ENSG00000184809	36.7561129579984	2.86571198472558	1.98004622923477	11.4336812843004	0.00329008906826541	0.036471324656096
ENSG00000230943	200.23139517124	0.932951455307504	0.27666027299216	11.4237882600205	0.00330640385115309	0.0366142146770464
ENSG00000260917	188.645517806288	0.666373565694739	0.277452221088414	11.4220866859992	0.00330921809359238	0.0366239487843484
ENSG00000092929	333.531221080479	0.740303910416014	0.323583737301786	11.4177808469813	0.00331635024850833	0.0366814310070252
ENSG00000149257	2761.09520881289	0.0319455207143012	0.245120260605469	11.4084983128757	0.00333177809032455	0.0368305492753459
ENSG00000180611	277.566747428594	-0.816346019767077	0.335273289386744	11.4034909607885	0.00334013023448057	0.0369013220592789
ENSG00000089248	1617.71976100584	0.49921065272254	0.187360512220134	11.3942015733806	0.00335568020081125	0.0370514864646166
ENSG00000122861	6917.4108262874	-0.423645855039291	0.409336453160647	11.3888318042047	0.00336470192058313	0.0371294366455019
ENSG00000006451	2955.57611521141	0.326701643555776	0.222661326058926	11.3809755178111	0.00337794494476074	0.0372321538029103
ENSG00000095585	454.876303573542	1.52771668724489	0.443684304668484	11.3821220789442	0.00337600898954481	0.0372321538029103
ENSG00000204282	188.890775787735	-0.830101110824153	0.337221869378083	11.3741589728242	0.0033894775435562	0.0373375218345757
ENSG00000226054	52.3949419899597	-0.130830556945797	0.453777654236274	11.3729264856248	0.00339156693111841	0.0373388040555067
ENSG00000189129	77.6648491647681	-0.314091885503567	0.409979124752404	11.3706928505224	0.00339535680850012	0.0373587951167818
ENSG00000120729	5.80407380974597	-4.76595917365301	1.53740059092881	11.3624719853783	0.00340934191645049	0.0374908749383065
ENSG00000185274	4.22484720627587	3.70535612477098	1.77913625602453	11.357075667774	0.00341855328362937	0.0375703373360545
ENSG00000074966	11.424277756274	-0.402294167495512	1.10365487246175	11.34909209028	0.00343222669869373	0.0376987175117695
ENSG00000083720	379.334588725534	-0.504293568685819	0.384665318617369	11.3417745486605	0.00344480743052399	0.0377930322450241
ENSG00000213539	6.39280439750252	3.06760013219153	1.75663130927189	11.342738003656	0.00344314837169948	0.0377930322450241
ENSG00000090020	2325.2762627484	0.229189612539648	0.204827554527518	11.3373117137595	0.00345250281655431	0.037833593400863
ENSG00000162975	7.577394664442	-0.153609108286136	0.979309305918576	11.3383767829199	0.00345066472888245	0.037833593400863
ENSG00000106624	116.957349111441	-1.19098069024068	0.461177308919042	11.3313548975686	0.00346280110753636	0.0379244855093319
ENSG00000105643	444.64670975402	-0.668372207019147	0.364737575211445	11.3280568134563	0.00346851612305027	0.0379651056267938
ENSG00000118971	2967.88117542219	-0.298753571694381	0.333006894085731	11.3250809523355	0.00347368087563274	0.0379996592897974
ENSG00000143924	1256.84954815322	-0.947925325894144	0.282727237029228	11.3228229690347	0.00347760484698614	0.0380206075847561
ENSG00000158467	808.506986909879	-0.342743177959027	0.26052792354412	11.3024346943841	0.00351323734105013	0.0383880003922481
ENSG00000112715	4897.69138808381	-0.995585801667531	0.294392712255357	11.2886502483057	0.00353753499262755	0.0385210349171397
ENSG00000180543	270.80120129763	0.826564067315818	0.27274002474876	11.2890905476895	0.00353675629110751	0.0385210349171397
ENSG00000106785	2226.20359289072	-0.545742352160898	0.210281063891443	11.290533249106	0.00353420596940065	0.0385210349171397
ENSG00000111371	5038.29274437562	0.158040780302868	0.290437727616747	11.2941968263792	0.00352773797687274	0.0385210349171397
ENSG00000166450	3.04042433281238	-2.5730395219885	1.44295993630126	11.2893367634986	0.00353632091525127	0.0385210349171397
ENSG00000271254	148.575481353077	-0.255601144184625	0.261303219099638	11.2885991957713	0.00353762529384353	0.0385210349171397
ENSG00000163344	715.28451621173	0.7047149989537	0.271808441677376	11.2808636528134	0.0035513345150352	0.0386258653431271
ENSG00000196189	630.124050221565	0.360787510468116	0.28812896607762	11.2814115238545	0.00355036181160136	0.0386258653431271
ENSG00000107821	23.9952569081758	1.56349489167492	0.736402953261704	11.2744010493624	0.0035628285086612	0.038728621209887
ENSG00000272568	6.78499745822224	3.90064874235991	1.57004281814527	11.2711149793348	0.00356868717232581	0.0387477938819656
ENSG00000172794	33.3750154865096	-0.627940012992447	0.685199177846193	11.2715488548884	0.00356791307323328	0.0387477938819656
ENSG00000166920	3196.6185269353	0.535516732428927	0.308536584188692	11.2668217140667	0.003576356060869	0.0387865549867884
ENSG00000259178	11.3088737164476	-1.64512923221184	0.925351055627682	11.2672950289438	0.00357550978974651	0.0387865549867884
ENSG00000105419	114.195371722285	-0.632203588196796	0.639582325461787	11.2606713696332	0.00358737089924673	0.0388837309669212
ENSG00000140848	665.40830595696	1.06457718240798	0.349007762385806	11.2582150521108	0.00359177946690269	0.0389092309165045
ENSG00000106823	59.8803111533604	1.97296167804979	0.799207257416443	11.2539410900076	0.00359946323867814	0.0389701612082287
ENSG00000115380	1792.4289488954	0.377281227778762	0.514092238451396	11.2514966028795	0.00360386534913337	0.0389955127114631
ENSG00000180155	182.10993201502	1.41744417761226	0.449160295491543	11.2379153538306	0.00362842112572449	0.0392387827453348
ENSG00000132915	10.4983679010389	1.85509964413266	0.95100643355274	11.2332110858536	0.00363696570343528	0.0393087241219375
ENSG00000142677	198.100829878018	1.93474789485974	0.65680848225532	11.2215062405401	0.00365831317018825	0.039516881704231
ENSG00000182742	51.5361023772837	-4.87301419797423	1.85346037062922	11.2193353347471	0.003662286252722	0.0395372317927917
ENSG00000268601	26.9180161331097	-1.316111429344	1.01428727417139	11.2172152389913	0.00366617050987806	0.0395566002847448
ENSG00000118596	1031.72311851286	0.0274919268020492	0.35245331114187	11.2077883997564	0.00368349149835626	0.0397208413711637
ENSG00000105996	6.53459407900632	-4.14214886310852	1.35731362207579	11.202234476542	0.00369373462863494	0.039808614946991
ENSG00000163053	173.784734841428	0.14763671109285	0.42777057616411	11.1935952194821	0.00370972470084137	0.0399581900759379
ENSG00000102181	364.593614802148	-0.184829088707023	0.297747054345778	11.1901516665737	0.00371611751940577	0.040004279894627
ENSG00000103067	2767.30665283789	0.700392515536277	0.289431314450514	11.1862248975134	0.00372342085433688	0.0400601135124079
ENSG00000164181	258.41671095672	-1.20447359646574	0.692506197582749	11.1785023191756	0.00373782585198606	0.0401922467322932
ENSG00000037042	518.937372056145	-1.34059503827992	0.407042127734251	11.1748850871755	0.00374459226070053	0.0402421399964551
ENSG00000008283	1658.98889880263	0.566836396637362	0.189778692058434	11.1663090163128	0.00376068368062333	0.0403921331758209
ENSG00000149328	64.5962202892393	-0.234139639976341	0.450378257150751	11.162068585083	0.00376866559959018	0.0404549044085332
ENSG00000162836	360.89649531183	-0.524842807368968	0.288951081802029	11.1607303248514	0.00377118817110934	0.0404590340919752
ENSG00000069493	71.3923990331635	-0.121154391932447	0.344271479370081	11.1561945922374	0.00377975042705605	0.0404591497918754
ENSG00000073712	168.120306596235	-0.847031045678494	0.344253772183045	11.1570094825014	0.00377821069984289	0.0404591497918754
ENSG00000102897	308.747157426451	0.53285312084172	0.249554534469336	11.1562524748912	0.00377964103764633	0.0404591497918754
ENSG00000131037	5994.84300038833	0.660389090563448	0.394737363291235	11.1576421623389	0.00377701569000169	0.0404591497918754
ENSG00000173391	15.913036407003	-0.447901407651664	0.859184157676879	11.1550368315695	0.00378193908366953	0.0404596931364872
ENSG00000134240	6.20145497270578	-5.07263827098922	1.58559540496243	11.1465508615746	0.00379801988563847	0.040608771941078
ENSG00000114423	618.93413104083	0.39303072269776	0.321680090142446	11.144650698825	0.0038016300282861	0.040624420262741
ENSG00000106025	35.6624349445105	0.654383124484196	0.753148491273102	11.1399682225018	0.00381054097684058	0.0406507824051342
ENSG00000254851	6.54400438161083	1.69686320572627	1.71347387713555	11.1401012923693	0.00381028745118346	0.0406507824051342
ENSG00000213412	14.1592389491969	0.839162248334221	1.25504543773442	11.1407064482947	0.00380913471657394	0.0406507824051342
ENSG00000184792	2276.75783842226	-0.993940419311383	0.330898650761184	11.1357567333349	0.0038185734570704	0.0407135226338351
ENSG00000274611	4.33017386784758	-3.10887871915634	1.94672400604577	11.1336324389147	0.00382263149895168	0.0407338407194034
ENSG00000260912	168.208981537822	-0.796724944863009	0.269146266486357	11.1320754184157	0.00382560861546131	0.0407426241123272
ENSG00000088002	1161.67152943278	1.79957937925314	0.530604859770601	11.1237416761004	0.00384158269150687	0.0408897370285532
ENSG00000117598	4.61605698444306	-5.91564045704566	1.76982989601904	11.1155437560677	0.00385736150162255	0.0410346073177104
ENSG00000185909	1424.47784184581	0.307760277785365	0.317308775961205	11.1132990205156	0.003861693310359	0.0410576100553619
ENSG00000184371	172.254173857566	-1.2009065331231	0.37093024132363	11.1062070317389	0.00387541116050279	0.0411572144851377
ENSG00000274528	7.70544485160833	3.02742824085598	1.53686056749247	11.1072079029866	0.00387347225189091	0.0411572144851377
ENSG00000197043	72.448401390062	-1.08842672626864	0.640077018712745	11.0867986858499	0.00391320188794753	0.0415119650949591
ENSG00000121060	2784.36226343803	-0.69991914902878	0.24042769220081	11.0874925952505	0.0039118444196628	0.0415119650949591
ENSG00000281097	31.8775054283774	2.13921379895776	0.664803917174544	11.0838724405076	0.0039189315729404	0.0415494565926594
ENSG00000167637	195.890280794821	0.240361597304135	0.225839878560966	11.0804176292382	0.00392570700769879	0.0415979871896414
ENSG00000169047	1486.98637291542	0.83293680894983	0.296396344728661	11.0778802793282	0.00393069061448026	0.0416038158722158
ENSG00000138669	89.5201942997025	-1.32725215157013	0.396510889260122	11.07566313539	0.00393505048408276	0.0416038158722158
ENSG00000273084	24.6067353011359	0.708317004878653	0.591126548965172	11.0763576272455	0.00393368429104279	0.0416038158722158
ENSG00000161681	4.53368105604733	-2.5095020738251	1.10572497877892	11.0762765223099	0.00393384381488302	0.0416038158722158
ENSG00000122707	52.543713228459	-1.41627191045451	0.557277925938113	11.0732336540007	0.00393983345448759	0.0416311268152862
ENSG00000137831	1012.77424305417	0.770017451222363	0.27888119591289	11.0563562273314	0.00397322125650748	0.0419604979237746
ENSG00000269113	29.5031432958481	-0.283242667641798	0.701040301322759	11.0496110203734	0.00398664397837616	0.0420787714951304
ENSG00000162711	5.07275079264265	-6.05099516792941	1.79887529947141	11.0417627557025	0.00400231883190709	0.0422168077846226
ENSG00000102837	286.507725344991	-1.81772721265579	1.70040187176095	11.0408312517684	0.00400418335394439	0.0422168077846226
ENSG00000155368	1878.06712502312	0.927699788460649	0.395031098418666	11.0376293642517	0.00401059896043453	0.0422609049700576
ENSG00000119408	583.809406047284	-0.513288360841602	0.289556211584544	11.035996252275	0.00401387517645736	0.042271890770426
ENSG00000266173	72.7686418093241	-0.622546702379619	0.322246796442496	11.0234763022363	0.00403908074559791	0.0425136835986876
ENSG00000159212	563.426371423516	2.09924321804836	0.991368520494874	11.0201188656257	0.00404586691882518	0.042561440488475
ENSG00000085552	672.735864266302	0.310435882938239	0.255330319964788	11.0152005255637	0.00405582863726076	0.0426188545031426
ENSG00000118855	2380.76087165	-0.725372266893788	0.223322309505398	11.0158403598408	0.00405453131569745	0.0426188545031426
ENSG00000154096	78.1852893761377	-0.127304243000699	0.469576383940038	11.0042741084036	0.00407804711188935	0.042828546943677
ENSG00000260228	8.5839505884639	1.94101090315532	1.06953728962665	11.0026428389469	0.00408137466558736	0.0428397202142212
ENSG00000148798	102.446394619453	-0.141260921384778	0.487555916284244	11.001331412091	0.00408405175536604	0.0428440573560434
ENSG00000166783	32.6153655919924	-0.153312184943074	0.610113574462749	10.9848125534499	0.00411792337977006	0.0431754570427415
ENSG00000107819	861.251440904878	-1.09084228848314	0.345247397797945	10.9764313374189	0.00413521619088213	0.0433178507478979
ENSG00000181856	25.8382597581462	3.02853540171595	1.11384095583164	10.9760125183693	0.00413608223521541	0.0433178507478979
ENSG00000196968	536.533830774033	-0.193446289968729	0.232397397949315	10.9669588250108	0.00415484808837069	0.043466279752579
ENSG00000277449	7.06357138020519	-4.97331485209797	1.59828117930105	10.9676418607655	0.0041534293757424	0.043466279752579
ENSG00000130309	2179.76165856631	-0.535729079370926	0.181692800531037	10.9649578815567	0.00415900697649143	0.0434857497403869
ENSG00000275832	626.948891248529	0.978660274519698	0.305366584608243	10.9593087577858	0.00417077095530027	0.0435846716339357
ENSG00000169919	885.243696961574	0.482324770971952	0.231983830781472	10.9571140643201	0.00417535024925867	0.0436084456220862
ENSG00000099725	190.560789205337	2.96603578221523	1.07139605767964	10.9490461178539	0.00419222751874271	0.0437605657982382
ENSG00000065361	3647.25196654097	0.75119173286418	0.239259089529606	10.9470724077221	0.00419636668174822	0.043779624835769
ENSG00000205746	72.3912980450264	-0.926696815886199	0.354087488050223	10.9442498064596	0.00420229319775935	0.0438172995964715
ENSG00000143847	226.196407439875	-1.64560494180566	0.618672830638922	10.9398996954563	0.00421144336615337	0.0438885273702932
ENSG00000143387	153.166354086085	-1.77090954163709	0.544334792916275	10.9305775778845	0.00423111897020815	0.044069304629163
ENSG00000107537	324.451457677125	-0.792914598715918	0.240127803413848	10.9272967117	0.00423806553391289	0.0441173763637521
ENSG00000163171	1375.06620170181	-0.500971209483394	0.302586518390996	10.9229710283156	0.004247241718484	0.0441276891178173
ENSG00000113248	37.7624372602439	0.0248070058620987	0.596878787186277	10.9225080647346	0.00424822499140224	0.0441276891178173
ENSG00000112078	2004.36481759844	0.418741086466454	0.180941824536787	10.9239779548792	0.00424510392642489	0.0441276891178173
ENSG00000165474	47149.3752296292	0.958182981917415	0.291014363411087	10.9224336457828	0.00424838306856872	0.0441276891178173
ENSG00000102316	2336.03407877979	-0.079990462314867	0.179265085620919	10.9188612670978	0.00425597826633988	0.0441581078346942
ENSG00000160179	594.644249912408	1.17724399589674	0.356978151655174	10.9191120973039	0.0042554445358567	0.0441581078346942
ENSG00000099204	8633.09769203031	0.882809254124215	0.378812400380645	10.9168781867339	0.00426020033263277	0.0441776938603152
ENSG00000169439	53.3197833095935	0.967300772838963	0.511916434674851	10.9022933891916	0.00429138096492597	0.0444065762969381
ENSG00000204949	959.629734154972	-0.322812314519855	0.390704077515054	10.9014161101799	0.00429326374705306	0.0444065762969381
ENSG00000137124	277.962779653228	-0.106367449704847	0.405546660039366	10.9026036366646	0.00429071532150586	0.0444065762969381
ENSG00000132274	4676.87815739387	-1.09751896181079	0.343288523735729	10.9048497973031	0.00428589920851971	0.0444065762969381
ENSG00000065717	200.883650965154	0.0178049280917606	0.47905122591343	10.9010710763723	0.00429400447151369	0.0444065762969381
ENSG00000113212	16.7186928100093	-1.0661733669217	0.66949756516648	10.8979285562357	0.00430075677269419	0.0444521146495017
ENSG00000228918	21.9958818908205	0.764225367403571	0.835140950130864	10.8967949335175	0.0043031951814795	0.0444530397431766
ENSG00000267278	74.3812842810776	-0.60576012211941	0.396500017451319	10.8884685407889	0.00432114757174711	0.0446141395500895
ENSG00000116679	5457.16310606721	-0.0384095760918968	0.248652824483953	10.8814485805662	0.00433634136313615	0.0447465977630053
ENSG00000283633	163.04992608821	-1.17575087158258	0.410755699290754	10.8762011100022	0.00434773371368605	0.0448397060117213
ENSG00000119938	2087.6395498259	1.16032993533277	0.605562304334412	10.8714925464645	0.00435798156233219	0.0449209156139088
ENSG00000139433	11183.0041754159	0.831086889636468	0.356578881804215	10.8677974692892	0.00436604054378017	0.0449794868214696
ENSG00000163359	1508.31055619444	-0.68597625673789	0.439879329726837	10.8524899744531	0.00439958532319986	0.045300409271794
ENSG00000204020	15.9059212156662	-1.74680695228935	1.62084085532381	10.8495030050387	0.00440616094567167	0.0453434452946365
ENSG00000138080	94.7846572295868	-1.18427218301185	0.485048294080904	10.8412095549605	0.00442447001870117	0.0454482623586979
ENSG00000146426	71.0440623866318	0.120244633911663	0.310977986900972	10.8383704257047	0.00443075529996289	0.0454482623586979
ENSG00000164654	1185.80726047076	0.598824852708968	0.195626850244773	10.8424039467725	0.00442182853214091	0.0454482623586979
ENSG00000086730	10.9508751834273	-2.66174593484735	0.81928449860245	10.838808067928	0.00442978586323317	0.0454482623586979
ENSG00000183479	16.1887997799458	-1.78583958190089	0.664559013499693	10.8393248645749	0.00442864136186792	0.0454482623586979
ENSG00000138613	104.581295376036	-0.826041489037973	0.268966579854058	10.8395336508185	0.00442817906630146	0.0454482623586979
ENSG00000110172	43.4737533357451	-0.51099592284382	0.951928336427937	10.8335939553581	0.00444134963145655	0.0455076024771604
ENSG00000286009	7.68609168266534	5.85512448388846	1.80145973567183	10.8339110385041	0.00444064554871453	0.0455076024771604
ENSG00000130822	29.5660077348894	-1.3581163494325	0.769243146896747	10.8184188418758	0.00447517679426258	0.0458293943892962
ENSG00000011478	199.394049579551	-0.00498030887427995	0.289186382924488	10.8149735120978	0.00448289266822259	0.0458835823397039
ENSG00000117519	2406.29572092448	0.175094394807562	0.308201041812945	10.8033974460227	0.00450891503560258	0.0461030339733722
ENSG00000161642	2586.33427226652	0.238471087099457	0.170574062605619	10.8032685680117	0.00450920559496496	0.0461030339733722
ENSG00000144668	8.4890945488087	2.84320685518031	0.947123482917542	10.8015299451642	0.00451312720320309	0.0461182139960143
ENSG00000277734	3.02175279227839	5.56018949974459	1.99590561094939	10.7934277527795	0.00453144739901441	0.0462804328258758
ENSG00000175611	43.756774660026	-0.426457185851966	0.399200842552802	10.7907931238998	0.00453742067358326	0.046316443499225
ENSG00000176428	13.0294517434535	-2.34679510544311	0.722361187500566	10.788245579155	0.00454320399721605	0.0463499054966164
ENSG00000011422	1145.14198173024	-0.565085101463136	0.375942018280559	10.7861150856665	0.00454804620909996	0.0463499054966164
ENSG00000100285	170.011870469714	-0.112413989338282	0.656331215872888	10.7865918856654	0.00454696208411912	0.0463499054966164
ENSG00000171566	1551.43040612266	0.0897610421923386	0.177934409536991	10.7830279480709	0.00455507185220598	0.04639652034607
ENSG00000147036	75.1078976149703	0.0515726517876166	0.300589245396007	10.7791275058127	0.00456396391750541	0.0464620856045131
ENSG00000274642	11.1084979601398	-1.54430846464422	0.846610629828626	10.7724178966779	0.00457930083629936	0.0465931550144975
ENSG00000104412	1004.10337187722	0.575406023575499	0.202911105728021	10.7676493132029	0.00459023225211047	0.0466792828431975
ENSG00000124357	2291.90474841997	1.14723447580632	0.361155086847441	10.7648421796721	0.00459667947303918	0.0467197416902612
ENSG00000160818	750.114580936293	0.0279310971789975	0.221087173938019	10.7637303133637	0.00459923563001772	0.0467206303264012
ENSG00000011201	50.6986266314764	0.451193714991733	0.678663379672955	10.762494977023	0.00460207730899147	0.0467244168844761
ENSG00000254016	5.99997223570095	4.64501230434529	1.55938372164144	10.7575918205993	0.00461337350254468	0.0467892302327943
ENSG00000176533	15.956633132426	1.02091007927934	0.736722736807084	10.7575778453404	0.00461340573920181	0.0467892302327943
ENSG00000271824	5.83229312993435	2.30156586121758	1.05653043521979	10.7488924600038	0.00463348390758422	0.0469676930642911
ENSG00000140905	93.1601507158272	-1.11218027218894	0.38581612544748	10.7426104138339	0.00464806066848827	0.047090229202966
ENSG00000176454	2896.99531143142	-0.907427957666708	0.343987811318316	10.7381811150578	0.004658365900229	0.0471693818415376
ENSG00000164128	4.36436745517839	-4.5975668196727	1.51232906084595	10.73535811155	0.00466494583456937	0.0472107486199066
ENSG00000175879	101.136382220685	-4.8960066288439	1.31794514400207	10.726063696035	0.00468667525850721	0.0474053069306515
ENSG00000128578	510.242988962743	-0.764482377189164	0.32016000808798	10.7203123748201	0.00470017194256851	0.0475144766949359
ENSG00000103449	13.6485552189258	-3.7599298992724	1.20324789328214	10.7193264354237	0.00470248955612232	0.0475144766949359
ENSG00000057019	1941.45431827881	-0.678966703005092	0.429469103873687	10.7134433981336	0.00471634238101254	0.0476290179085711
ENSG00000153292	4823.40312324023	0.551811687453342	0.20236743082628	10.7119051031077	0.00471997133944854	0.047640244052834
ENSG00000016402	793.871213381635	-0.683909280965309	0.354025398682572	10.706169397777	0.00473352695029122	0.0477350223084805
ENSG00000107372	4543.62300560192	0.434359151477548	0.215603050896713	10.7057979438225	0.00473440617558879	0.0477350223084805
ENSG00000143543	240.199320896465	0.365674790507757	0.205662479588466	10.7028484760924	0.00474139331552656	0.0477800151737701
ENSG00000170584	552.889928138801	-0.21423203120699	0.188097042243103	10.6963420427132	0.00475684321269814	0.0479101957425823
ENSG00000171860	6.34771137872432	0.338091815860367	0.9607428576104	10.6908357724636	0.00476995748923438	0.0480167263211493
ENSG00000102390	612.771283517184	0.171712961131207	0.179823767364501	10.6896227711125	0.00477285134914924	0.0480203146106589
ENSG00000103888	273.881106450162	1.31712508650564	0.663259017966675	10.6830046159749	0.00478867124468291	0.048153880608727
ENSG00000067048	858.447276230213	4.66753171947293	1.33297668843867	10.6803949469618	0.00479492374651641	0.0481911481162098
ENSG00000118707	313.70686206847	0.417857989159869	0.402732579898124	10.6743783418683	0.00480937004636007	0.0483106837194078
ENSG00000174501	39.7477350845119	0.587946637008106	0.579180459396631	10.6695174776046	0.00482107310984461	0.0483512499225275
ENSG00000196460	11.1118518316434	-2.63154224825843	1.01897086663131	10.6703989130382	0.00481894884564594	0.0483512499225275
ENSG00000198692	260.335245372326	5.50234041390594	1.46715739693066	10.6706408406195	0.00481836596258141	0.0483512499225275
ENSG00000145107	18.650190417687	-1.10917479954153	0.740479758857664	10.6598691730255	0.00484438689012477	0.048507948092916
ENSG00000139793	1022.55290200793	-0.266544289589988	0.235268079878731	10.6602130553719	0.00484355401216473	0.048507948092916
ENSG00000101336	14.8439895945046	2.49746549384814	1.47240914936657	10.6605228510322	0.00484280381426139	0.048507948092916
ENSG00000170324	3.0636223845001	-5.59137645647161	2.01798288466099	10.6562798595571	0.00485308870773256	0.0485693832860067
ENSG00000147231	15.717687766204	2.12857440593437	0.691611584322835	10.650832332405	0.00486632539260266	0.0486761141939775
ENSG00000164292	465.711829987059	-0.51670650823224	0.592746145370031	10.6466242424029	0.00487657513940139	0.0487528708468945
ENSG00000170854	740.268623323076	0.33164138412759	0.252764296698766	10.6443432083601	0.00488214012923348	0.0487827359798012
ENSG00000197959	18.7448140572512	2.89598682978817	0.87071136462966	10.6427602177096	0.00488600584997107	0.048795599319632
ENSG00000171811	22.662220153475	-1.41853907688138	0.575807373993474	10.6406232754695	0.00489122919611466	0.0488220002829483
ENSG00000163697	563.680981026672	-0.934760591608341	0.298823669576164	10.6391282557838	0.00489488680496131	0.0488327531807553
ENSG00000274414	50.3664057361699	-2.01285178732734	0.623110326372835	10.6298846588351	0.00491756234585442	0.0490331229690701
ENSG00000151208	9.86336029815538	1.77310191424297	1.63008542102953	10.6282739280973	0.00492152437549384	0.049046787154408
ENSG00000224566	8.16407755389291	-5.34687264984944	1.63155278595293	10.6173028165623	0.00494859585508751	0.0492906192408058
ENSG00000169676	6.93885617741672	2.82106735817488	1.71530012284217	10.6136300761415	0.00495769165817379	0.0493552417837659
ENSG00000125384	12.2243331650345	1.2593935898983	0.971731515239118	10.6111574767572	0.00496382464116586	0.0493903161588138
ENSG00000158125	3467.29424161345	0.979435389244355	0.361086153267246	10.6083843737321	0.00497071201347507	0.0494121349110146
ENSG00000164687	31143.8260097566	-0.134564993464829	0.197416003956956	10.6081722038734	0.00497123935907909	0.0494121349110146
ENSG00000275131	212.136460001642	-0.766767002973922	0.349325698694261	10.6000539377723	0.00499145929099759	0.0495867687786717
ENSG00000145246	2011.16329888426	0.701878406644345	0.21507088083817	10.5979674240748	0.00499666938234753	0.0495867687786717
ENSG00000107562	16.1075885707775	-5.03023599032765	1.51112296754635	10.5981443480122	0.00499622738668705	0.0495867687786717
ENSG00000138190	118.205745149542	0.725173086440704	0.395370219993627	10.5859551164441	0.00502677045256265	0.0498429618972389
ENSG00000160299	859.054612579371	-0.130298842787619	0.162611332653244	10.5855644654678	0.00502775240485226	0.0498429618972389
ENSG00000266094	2038.25138966361	0.869297958494515	0.26685197141844	10.5799648446868	0.0050418488828003	0.0498651822075326
ENSG00000115756	440.646972457055	-0.711592379187196	0.273675367613771	10.5784846102899	0.00504558182310688	0.0498651822075326
ENSG00000253768	16.5161143649715	-0.675891567461673	0.822629675513589	10.5825864651452	0.0050352443053302	0.0498651822075326
ENSG00000153317	611.992639198071	-0.753327936846466	0.30125816758063	10.5802403554167	0.00504115438890361	0.0498651822075326
ENSG00000259342	50.2946835532281	0.305088439683834	0.429069738626608	10.5779280149425	0.00504698619219795	0.0498651822075326
ENSG00000123700	44.9467195074343	1.25283453103727	0.609386064070175	10.578534003321	0.00504545721635559	0.0498651822075326
ENSG00000130303	2658.51941037653	-4.27710788165234	1.1601239083647	10.5773527817867	0.00504843799786697	0.0498651822075326
ENSG00000118257	859.744179530861	0.24138341281469	0.381139895329213	10.5753294803196	0.00505354783812183	0.0498896154598099
ENSG00000162490	19.3360298577401	-2.06775932555698	0.819424927232581	10.5720298023294	0.00506189225999206	0.0499459390095671
ENSG00000203797	12.929888707889	-1.15084043446736	0.882106935874299	10.5701738696491	0.00506659170575348	0.0499662574420973
ENSG00000118898	45457.9765455746	0.990351282341821	0.314000928682989	10.5667382194926	0.00507530270389013	0.0500260956620421
ENSG00000115919	1278.86129231166	0.534849177716004	0.420249257333492	10.5618457566946	0.00508773326654157	0.0501225153926596
ENSG00000101608	5082.78700863788	0.000342971095814656	0.231679396123335	10.5598250563247	0.00509287625646133	0.0501470776032938
ENSG00000158457	124.979887133735	1.15680587048862	0.599003388232183	10.5530305338491	0.00511020751028567	0.0502915637712721
ENSG00000082269	1712.53631220528	0.747247017653765	0.238755506764997	10.5462866269485	0.00512746797652166	0.0504090033535961
ENSG00000130702	7806.01684365232	-0.492854204927273	0.299004719056476	10.5470022227155	0.00512563370750033	0.0504090033535961
ENSG00000250397	24.0620663716741	-0.997755521634537	0.622103243603545	10.5371552690537	0.00515093187266438	0.0506133882088127
ENSG00000117862	174.876693848103	0.973838308508233	0.308944720744965	10.5343801593068	0.00515808403414783	0.0506208114166703
ENSG00000107796	61.8063976402423	-0.63409734781341	0.444600500357786	10.5338959237671	0.00515933304914915	0.0506208114166703
ENSG00000262519	14.3215907544015	1.89892609523811	0.88644769268453	10.532424877578	0.00516312925368622	0.0506208114166703
ENSG00000171291	43.3044699170707	-0.776779464432206	0.640800417644066	10.5317561949805	0.00516485578963649	0.0506208114166703
ENSG00000269343	370.969844316063	-0.330683538636779	0.259933688135038	10.531676580608	0.00516506139210517	0.0506208114166703
ENSG00000109846	578.812765869643	1.25249304979268	0.854536350573863	10.5274160597004	0.00517607604600551	0.0507025047467155
ENSG00000230989	2676.83885153105	0.343190736497641	0.178157785623541	10.5262254962474	0.00517915818677072	0.0507064504317826
ENSG00000163683	2145.78222349447	0.195957931599353	0.314838856213599	10.5010213572544	0.00524483928782979	0.0513229490807543
ENSG00000230409	181.423058199252	-0.126955292071516	0.39956689119144	10.497045677111	0.00525527555891808	0.0513581538746239
ENSG00000168743	787.966547326957	0.193150465278096	0.513228951554961	10.4966797408074	0.00525623719494613	0.0513581538746239
ENSG00000099250	852.30479537926	0.404217986190914	0.422391528836655	10.4955177018202	0.00525929205860085	0.0513581538746239
ENSG00000250133	5.09387443840591	-3.20162331022818	2.03523878273832	10.4961742925942	0.00525756574066582	0.0513581538746239
ENSG00000105835	24052.4505501581	0.207874286708183	0.245525902419474	10.487372999195	0.00528075341294684	0.0515411337493651
ENSG00000103260	675.086736161169	-0.358384327238633	0.317421767542915	10.480917557371	0.00529782574871463	0.0516811094301156
ENSG00000128602	415.806250359507	0.915441633929719	0.316054717331248	10.477299706199	0.00530741779429426	0.0517016922384148
ENSG00000120915	352.310404973425	0.828003189699793	0.280491879228523	10.4770307900948	0.00530813146733104	0.0517016922384148
ENSG00000235097	34.158569325616	3.48353604968278	1.18383983658132	10.4787834137655	0.00530348192642411	0.0517016922384148
ENSG00000148468	291.097118241498	0.313906297132919	0.328102695433048	10.4724538915191	0.00532029276695863	0.0517934879705206
ENSG00000158201	296.578519134083	0.450875198454215	0.250315313738416	10.4710253304612	0.00532409430601136	0.0518038481960231
ENSG00000144730	122.493674848742	-0.0879261962448095	0.295659999226775	10.462991111578	0.00534552479099896	0.0519856406318887
ENSG00000136451	1087.67226447903	-0.195103675161078	0.295864812639336	10.4615047130753	0.00534949905767484	0.0519975704501779
ENSG00000248122	6.43443740483454	2.05120955338498	1.1107851415347	10.4559358607547	0.00536441509946692	0.0520988068103777
ENSG00000179361	188.551774443793	0.240735676714197	0.296490613588311	10.4555612223906	0.005365420051436	0.0520988068103777
ENSG00000112541	6.29367521046285	-1.27532795266729	1.45991127863868	10.4502757565188	0.00537961817638356	0.0522098840964404
ENSG00000165507	374.077931820608	-0.550617465250876	0.619019436895263	10.4456142340442	0.0053921714055077	0.0523048917730565
ENSG00000277496	77.8924803041339	1.80189009756724	0.568189460300297	10.4368106206724	0.0054159590174779	0.0524818353332152
ENSG00000221890	31.3875033851363	0.771533554666873	0.608397114757406	10.4370621976879	0.00541527779492085	0.0524818353332152
ENSG00000116984	725.776461038498	-0.596325999763033	0.212924032802308	10.4334013681388	0.00542519907666529	0.0525332522871176
ENSG00000130720	10.9114733694576	1.66027413061023	1.03152244579663	10.4328050777435	0.00542681681486473	0.0525332522871176
ENSG00000137203	2250.52425089562	-0.676062055297155	0.221155010758177	10.4230633886542	0.0054533144765493	0.0527088746009681
ENSG00000204136	10.0173980331643	2.73283927969544	1.40803066114143	10.4242270714177	0.00545014243542114	0.0527088746009681
ENSG00000138316	77.6383354903664	0.657445234977496	0.721520298849584	10.4233514291429	0.00545252914541902	0.0527088746009681
ENSG00000261379	3.97138013536146	-3.56824503709259	1.60628658812776	10.420594772012	0.00546004970380381	0.0527470345301108
ENSG00000187098	221.196680820655	-1.45514115899082	0.509404859806639	10.4185065898317	0.00546575347015886	0.0527751961340594
ENSG00000124201	3805.04320635807	-0.676995347826592	0.216590234732004	10.4121721418207	0.00548309217905121	0.0529156142215932
ENSG00000003096	78.7722905949455	-0.115478324186759	0.567541920034975	10.4073752493285	0.00549625886438674	0.0530156467933329
ENSG00000081842	15.3463519339536	-2.4905534541061	1.35726237228758	10.4006733262995	0.00551470750940156	0.0531665000588
ENSG00000077097	3415.53799181269	-0.37060013146919	0.215191710242439	10.3974801395531	0.00552351928740735	0.0532243393656742
ENSG00000171132	192.892765099427	-0.0543888018997292	0.236766060371752	10.3932673665284	0.00553516621609541	0.0533094252618858
ENSG00000107968	666.094715306403	0.767691053633407	0.255029139303429	10.3918567712537	0.00553907153279361	0.0533199027253911
ENSG00000238290	3.65558225773621	-4.69769688929844	1.67197700608466	10.3889627476447	0.0055470924364591	0.0533428477438965
ENSG00000076356	2082.84685738721	0.753451297091693	0.25429474172203	10.3899023057565	0.00554448714061598	0.0533428477438965
ENSG00000271579	3.8203856447382	-5.65727514289305	1.78100070565248	10.3831054626876	0.00556336169879895	0.053444984847599
ENSG00000167491	2504.10001722198	-0.27817170664484	0.166918881515699	10.3833208366623	0.00556276262939466	0.053444984847599
ENSG00000141068	914.295146303407	0.895332797598054	0.275857819123379	10.3779891541036	0.00557761185568534	0.0535546952657762
ENSG00000084674	4.53284956328097	-4.74423456452647	1.71903736361856	10.3748076951265	0.00558649138793437	0.0535584344056018
ENSG00000095015	977.601895187016	1.0371216730579	0.33147571361144	10.3750639512034	0.00558577564760529	0.0535584344056018
ENSG00000197182	279.721644466713	-1.02868846192951	0.568003825169085	10.375051387903	0.00558581073560402	0.0535584344056018
ENSG00000203650	3.02930674812332	-5.61983034353483	2.23892430972979	10.3640574028339	0.00561660044338331	0.053819829565078
ENSG00000137767	1523.78248920298	0.610563718046084	0.243386195210018	10.3590185063102	0.00563076901860932	0.0539282913346059
ENSG00000173535	60.9802385536539	-1.13174569756702	0.678765830996753	10.3533372907973	0.00564678656376928	0.0540543428018885
ENSG00000203783	5.26885119283173	-1.79683463116097	2.38981266874789	10.3517889003446	0.00565115997168857	0.0540688586775562
ENSG00000042286	102.191197762697	-0.900162963008975	0.305914024342136	10.3501759039604	0.00565571946035132	0.054085139356821
ENSG00000164707	61.7806408901885	2.49379097583658	0.74157162195213	10.3432940130694	0.00567521400306367	0.0542441540444343
ENSG00000251151	4.84849929535672	-3.19987800184592	2.02565306099305	10.3359112836384	0.00569620200113308	0.0544172755534798
ENSG00000102144	13144.1146459449	-0.304279695775596	0.227966952098234	10.328345194167	0.00571779179996616	0.0545409323661086
ENSG00000259479	39.3798133369148	1.72651116468378	0.601210436917947	10.3290070713327	0.00571589987512346	0.0545409323661086
ENSG00000167769	12.3842828130779	4.11454691263689	1.93727651553766	10.3297431210806	0.00571379666883212	0.0545409323661086
ENSG00000165804	1294.95937683267	0.365082706448465	0.293799148140567	10.3200952848288	0.0057414261437347	0.0547387857784278
ENSG00000237523	115.689188131259	-1.09355110200006	0.505153749830847	10.3152066788508	0.00575547709421324	0.0548389687944805
ENSG00000167565	605.694372419538	0.0568816776950459	0.174551394690242	10.3144241282243	0.00575772951094492	0.0548389687944805
ENSG00000197122	2741.03081851947	0.201248828547945	0.177269781842109	10.3132919444001	0.00576098983778826	0.054842420865263
ENSG00000212864	158.131267377053	1.10817593160251	0.39146592553169	10.3043043677533	0.00578693676298274	0.0550617286271736
ENSG00000138018	1494.82563095229	-0.371433920420852	0.218412352618294	10.2966263882905	0.00580919545189425	0.0552179929317422
ENSG00000167549	202.350283946743	-1.57160185794984	0.561735452703019	10.2966443401528	0.00580914330918967	0.0552179929317422
ENSG00000232229	37.6697082368915	0.216546159791938	0.526337187697435	10.2912684670783	0.00582477892209422	0.0553383238456994
ENSG00000113811	658.653301889622	0.403994861228181	0.14933923342323	10.2858774748961	0.00584050077048154	0.0554042491635906
ENSG00000270917	4.03083518555697	-4.65912812543624	1.68548754622695	10.2865778232149	0.00583845593607878	0.0554042491635906
ENSG00000171298	1921.97824786131	-0.304885016415918	0.279092419754196	10.2878377926678	0.00583477895635505	0.0554042491635906
ENSG00000125520	1361.6802250485	0.207109673396922	0.194927675686912	10.2845116109831	0.00584449079740294	0.0554143228160574
ENSG00000160695	8.52741386021253	-6.93251109066838	2.08440423889811	10.2785946420113	0.00586180723533117	0.0555506769797908
ENSG00000180198	1036.31487854506	0.469739758941989	0.162594044956895	10.2702818901408	0.00588622181279473	0.0557541280316017
ENSG00000272170	3.44230224491222	0.876388577980853	1.22899025414433	10.2665574555144	0.00589719344957912	0.0558301080706778
[truncated: 56,885 more rows]
