# Supplementary material for: Characterization of 3D organotypic epithelial tissues reveals tonsil-specific differences in tonic interferon signaling
Source: bioRxiv preprint, doi:10.1101/2023.01.19.524743, version 1 (2023-01-20)
Supplement: Supplementary File 8 [file 524743_file27.csv]

	baseMean	log2FoldChange	lfcSE	stat	pvalue	padj
ENSG00000178919	1575.68332217779	3.37396256440202	0.273330448908608	12.343895741854	5.25502962407957e-35	9.0412784682289e-31
ENSG00000178372	2007.43427844391	-7.14758981796547	0.620563079339128	-11.5179101946853	1.0717894930992e-30	9.22006911438588e-27
ENSG00000180818	163.120571419095	-4.71071903862052	0.422548467253556	-11.148351973062	7.29448508456205e-29	4.18338719599634e-25
ENSG00000130775	517.41152742028	2.4395387541374	0.229756956784217	10.6179102834677	2.4600657349626e-26	1.05813577425079e-22
ENSG00000182809	201.685086390259	3.19312417538008	0.315481414198654	10.1214335668263	4.43866137738953e-24	1.52734337995974e-20
ENSG00000038427	1493.39079712184	5.61652586190056	0.558342493343588	10.0592842723943	8.36039250356747e-24	2.39734255039797e-20
ENSG00000156218	175.291965589165	7.56986523137625	0.760913132843018	9.94839608444236	2.56280267563875e-23	6.29900286205209e-20
ENSG00000165272	14796.3595967715	-2.69943319124599	0.282808562766551	-9.54509002428713	1.35989441842438e-21	2.92462293362393e-18
ENSG00000186395	18736.5839897011	-4.08682467557299	0.429043336901362	-9.52543560072244	1.64351191180568e-21	3.14184693806852e-18
ENSG00000136514	166.231196525709	3.37938056732385	0.36441119941102	9.27353652353653	1.80074030338653e-20	3.09817369197652e-17
ENSG00000139278	210.599509176703	3.37139356753797	0.366511365825677	9.19860577841261	3.62624072698405e-20	5.67177015525097e-17
ENSG00000160471	150.934622605015	3.91015311846805	0.430889028700665	9.07461749550463	1.14077477437262e-19	1.63558583275675e-16
ENSG00000198092	430.39364387991	-2.00050265504632	0.224290161649281	-8.91926172925263	4.69406829174168e-19	6.21241884303198e-16
ENSG00000260027	68.5268089204683	6.46363245834082	0.734861886114985	8.79571056884211	1.42145556184736e-18	1.74686735297027e-15
ENSG00000267795	142.885336927303	-3.04081554537033	0.348020948208454	-8.73744974555088	2.38431700711777e-18	2.73481160716408e-15
ENSG00000100097	2848.83315666806	3.48500059123212	0.402321691369551	8.66222395160639	4.62648310638066e-18	4.97491511532996e-15
ENSG00000188373	1251.98990305781	-1.77270475236285	0.216628018729615	-8.18317391609188	2.7646370591521e-16	2.79797532957129e-13
ENSG00000124920	268.661595938447	3.2885657633772	0.409620606407987	8.02832111454311	9.88155612304085e-16	8.9480091103641e-13
ENSG00000167772	3449.50549207636	2.69052404905514	0.335017476615703	8.03099610275386	9.66844252499597e-16	8.9480091103641e-13
ENSG00000150687	6031.467188729	2.27340196359536	0.283689253494137	8.01370490984194	1.11303579141237e-15	9.57489039562494e-13
ENSG00000119714	796.370116838964	1.90119500380376	0.23920633475053	7.94792916243848	1.89655041901137e-15	1.5538166647186e-12
ENSG00000005073	50.3191792682959	4.52879587684712	0.571447896328459	7.92512476805766	2.2791737183124e-15	1.78241744652567e-12
ENSG00000104783	186.103361969405	2.30335774952819	0.292997548668362	7.86135501814493	3.80000086201701e-15	2.84256586221751e-12
ENSG00000172927	691.273071252645	3.63081903990456	0.463386204732707	7.83540598063101	4.67330233610498e-15	3.35017361219526e-12
ENSG00000154227	2658.23125615698	-1.81475553158063	0.235057829785998	-7.72046407997906	1.15906913395922e-14	7.97671377990735e-12
ENSG00000267313	66.4896437129234	6.77600863464092	0.88171096884326	7.68506786700244	1.52915909171761e-14	1.01189162203852e-11
ENSG00000087494	8237.27893721096	4.00227582780845	0.526088756459548	7.60760571038015	2.79220123493737e-14	1.77925267581842e-11
ENSG00000130513	5502.13764566392	4.17041726085248	0.55433084162744	7.52333615176217	5.33959044880574e-14	3.28098763113224e-11
ENSG00000125675	208.420838367519	5.16392768336731	0.692007559391963	7.46224172450461	8.50626436945246e-14	5.04656132677343e-11
ENSG00000111249	111.733479928655	8.80957464768092	1.18188300076053	7.4538466514977	9.06573653461367e-14	5.19919990260094e-11
ENSG00000156299	1938.4812365044	-1.99039618406882	0.267408969445782	-7.4432663503921	9.82257584680856e-14	5.45152959497875e-11
ENSG00000166825	221.075734384014	3.62963241162136	0.492257988028703	7.37343527152621	1.66286443000811e-13	8.94049453696546e-11
ENSG00000113578	105.172402279437	4.04350215974566	0.549052834812989	7.36450465850506	1.77805845110509e-13	9.27015019735244e-11
ENSG00000160182	48.7230481257144	9.65764615653362	1.31686765830143	7.33380161298104	2.23714188968447e-13	1.13205959447122e-10
ENSG00000175040	303.266768641307	3.97555148839207	0.549801307535156	7.23088765687931	4.79847184003587e-13	2.3587916573662e-10
ENSG00000198959	2080.02547014498	3.21019750500682	0.448109404422764	7.16386996863425	7.84308021338111e-13	3.74833875197839e-10
ENSG00000012171	818.053016629981	3.19398476041284	0.451098457933867	7.08046038339836	1.43676335422684e-12	6.6809495971548e-10
ENSG00000087495	119.994363345663	-2.3191839629423	0.331267739905858	-7.0009351456963	2.54259629751122e-12	1.15119392891265e-09
ENSG00000128342	186.130251927981	3.76266688552709	0.541175872636278	6.95276170978887	3.58203465652462e-12	1.58022836578221e-09
ENSG00000092969	365.359544644266	3.81917239587313	0.549752602537896	6.94707469913227	3.72938259566057e-12	1.6041006889585e-09
ENSG00000080031	198.241638002139	1.64481300253347	0.238800959612429	6.8877989653098	5.66622057499316e-12	2.37773963396969e-09
ENSG00000164684	136.106760106046	3.64584667451462	0.530239968183402	6.87584281321769	6.16244210650042e-12	2.52440039148428e-09
ENSG00000169908	8789.70115453446	1.5436466285936	0.224872494358914	6.86454176174084	6.67050250497107e-12	2.66897664181459e-09
ENSG00000196208	49.6877185051248	4.77939477220717	0.698088253569857	6.84640480306965	7.5728998461958e-12	2.9611759512227e-09
ENSG00000105929	440.423749231241	-3.20667629776104	0.475128333016858	-6.74907403942856	1.48791652590698e-11	5.67760053744199e-09
ENSG00000245848	256.169759246203	-2.73233553694032	0.405020257056756	-6.74617007256858	1.5179867754858e-11	5.67760053744199e-09
ENSG00000136235	1126.37917320692	-3.06628604157313	0.455676763260151	-6.72908142086357	1.70737500638981e-11	6.25008233722058e-09
ENSG00000197142	55.2712301081258	3.73375602677171	0.559057205081612	6.6786654260661	2.41127941092124e-11	8.64292963852082e-09
ENSG00000251381	578.300624825702	3.38785717245225	0.508880983361286	6.65746467882256	2.78591326209315e-11	9.78196687230871e-09
ENSG00000071282	115.059697855871	3.5140732572172	0.531526826038384	6.61128109640026	3.81008215092406e-11	1.2853424197382e-08
ENSG00000125089	1336.58194121662	2.20469603450566	0.333386141358705	6.61304043869516	3.76505547037542e-11	1.2853424197382e-08
ENSG00000179820	703.154563660744	2.05566691956406	0.311508721750083	6.59906697961825	4.13753366416663e-11	1.36896666715359e-08
ENSG00000206073	2704.12677508844	-1.58894507768909	0.241470685713378	-6.58028146561503	4.69558515809599e-11	1.52429325745361e-08
ENSG00000159167	578.879274449112	3.06161158089015	0.466992654162024	6.55601657457318	5.52640914675092e-11	1.76077535870092e-08
ENSG00000111186	274.135287082811	3.02452982883288	0.462117660230244	6.54493452452336	5.95214574350824e-11	1.86193940940108e-08
ENSG00000105376	56.8024645434123	2.90204181207411	0.444034222253145	6.53562645993453	6.33438326518915e-11	1.94612614424249e-08
ENSG00000134013	1007.11871464317	2.01869291486579	0.309461115322566	6.52325224369985	6.87990144185534e-11	2.07664393521265e-08
ENSG00000145287	430.046305118636	3.0931903629493	0.477491103969531	6.4780062649014	9.29424956651008e-11	2.75702696192769e-08
ENSG00000135253	602.545516809517	3.3695659996561	0.521447928499923	6.4619414815771	1.03368075308045e-10	3.01431819605918e-08
ENSG00000183484	49.0924648134032	3.17513244772315	0.491696487040272	6.45750484579543	1.06443344975178e-10	3.05226291716324e-08
ENSG00000164125	88.4041827352942	2.48828634858999	0.386224033450494	6.44259842237119	1.17445152207065e-10	3.31253089134845e-08
ENSG00000120594	684.079266331438	-1.42278771405948	0.221036150458169	-6.43690053011824	1.21937784998652e-10	3.38377353371259e-08
ENSG00000141756	208.696506527934	3.05015908105973	0.474288873648127	6.43101546447542	1.26754262815101e-10	3.46159855830764e-08
ENSG00000141448	57.6162145402323	3.49177125085941	0.544160361187267	6.41680559613153	1.39163444553803e-10	3.74110478679404e-08
ENSG00000172164	361.513706464507	2.97192236198856	0.465604187191213	6.38293736127432	1.73722979752381e-10	4.59831364098418e-08
ENSG00000087245	2641.63118739735	2.1320084625748	0.334775153434542	6.36847878554306	1.90912171826778e-10	4.9767332064844e-08
ENSG00000186529	495.416409412884	-2.26322325733936	0.357882104969122	-6.32393524547595	2.54984613035524e-10	6.54777651832267e-08
ENSG00000003436	144.298517089892	2.81760583963149	0.447791075858687	6.29223312284291	3.12931040966028e-10	7.9176155291478e-08
ENSG00000214814	439.865196724384	3.26557751173162	0.519402637905348	6.28717929678038	3.23285932397743e-10	8.0610644447872e-08
ENSG00000112303	212.767859728407	4.12861342285249	0.658600643946469	6.26876614956371	3.63920179875768e-10	8.94463813537514e-08
ENSG00000175505	211.117468690724	2.15359139890052	0.344383545845702	6.25346775384391	4.01437481725927e-10	9.72779137055574e-08
ENSG00000173917	39.1238845313035	6.12759583793224	0.982163060679464	6.23887833217138	4.40719602926517e-10	1.05313621782649e-07
ENSG00000155093	218.179114967509	4.20557006000212	0.674498344216848	6.2351080563217	4.51466349323086e-10	1.06403815617859e-07
ENSG00000197496	419.162937650799	2.93456757806352	0.471715031567101	6.22106013521445	4.93806840126312e-10	1.14810090329368e-07
ENSG00000164403	404.315085835333	1.95170110949609	0.314126615657543	6.21310329088386	5.19482764917177e-10	1.19169346272e-07
ENSG00000101210	526.496621107504	2.69699530687295	0.436260766956981	6.18207162125789	6.32658086112549e-10	1.43222136467979e-07
ENSG00000162105	252.472270496075	2.62632091288996	0.425928155784423	6.1661124704309	6.9989312061502e-10	1.56385209612746e-07
ENSG00000213626	499.73840952124	2.93662012246961	0.478584134706121	6.13605823827166	8.45941560966086e-10	1.86595186620789e-07
ENSG00000111885	389.834248536434	-2.70985064001145	0.446235250392178	-6.07269514819789	1.25781100200749e-09	2.73932130247327e-07
ENSG00000100196	159.420456466741	1.70602853274366	0.281696863652612	6.05625675281756	1.3932556127168e-09	2.99637035209906e-07
ENSG00000164749	18.4317605474631	7.83247280526077	1.3000366607168	6.02480917802901	1.69309259251011e-09	3.59625408075758e-07
ENSG00000072682	1796.99985471484	1.31824270353461	0.219622961097701	6.00229910818924	1.94542890637616e-09	4.08184199197583e-07
ENSG00000258484	26.0385088708438	-4.88564034003765	0.814794524945343	-5.99616245625285	2.02034911819061e-09	4.18796464800837e-07
ENSG00000137460	1031.97963633643	-0.883747493855374	0.14774059597861	-5.98175124448072	2.20751225192274e-09	4.52145813027746e-07
ENSG00000135929	98.8374575965309	3.45786639442025	0.578579074878536	5.97648021602955	2.280102293924e-09	4.61519529023087e-07
ENSG00000125730	30053.1544596058	3.82630351539363	0.640839172259869	5.97077032900544	2.36135965298503e-09	4.72409218948924e-07
ENSG00000256812	932.462348124121	-1.53102985642328	0.257557070599242	-5.94442953113703	2.77421280399029e-09	5.48624497616701e-07
ENSG00000170421	5268.12328676501	3.22443925435486	0.543146237355253	5.93659503204082	2.91002269340059e-09	5.68942504999514e-07
ENSG00000091831	409.03719476537	1.9798229568694	0.333813111163637	5.93093228114361	3.01219436198538e-09	5.82301168516386e-07
ENSG00000167601	175.95093571708	1.61223781353208	0.272651708944212	5.91317699703824	3.3557123798404e-09	6.41500349946157e-07
ENSG00000126778	24.9882083113624	5.4701231387289	0.9287149595465	5.88999141501932	3.86215681869073e-09	7.30202286434879e-07
ENSG00000140263	1658.09362475001	-1.55880464730082	0.26540584495664	-5.87328680555429	4.27238371887954e-09	7.9898219438394e-07
ENSG00000258175	24.6449654404454	8.68263076660502	1.4837828566395	5.85168559385406	4.86615864508731e-09	9.00239349341152e-07
ENSG00000176170	1389.40966797494	2.20430437455629	0.377612360643716	5.83747939500341	5.29964461989021e-09	9.7000410303416e-07
ENSG00000173898	3523.8054484708	-1.05156263414723	0.180907335889425	-5.81271416649443	6.14679669426507e-09	1.11321723289295e-06
ENSG00000170689	14.6391508785375	7.94381507349011	1.37563745298466	5.77464291645649	7.71164510480999e-09	1.38207139612767e-06
ENSG00000183778	1087.11894452054	5.66173712702872	0.981174173779305	5.77036909279902	7.90980914888975e-09	1.40297181862524e-06
ENSG00000125998	1619.62238623408	-2.3950279398165	0.416382013384736	-5.75199663488706	8.81955555248164e-09	1.54837197224946e-06
ENSG00000272899	302.623632767869	3.27228234264891	0.570972778087019	5.73106541718561	9.98017642412805e-09	1.73443369067801e-06
ENSG00000165794	247.428527461655	-1.80683892165262	0.315375875691157	-5.72916022093596	1.00929032994921e-08	1.73648401267762e-06
ENSG00000112299	84.2156956836819	5.20432155268182	0.913419130725153	5.69762705599364	1.21486439560724e-08	2.0694793986557e-06
ENSG00000131773	136.647206711492	3.8528303425366	0.676829617445778	5.69246711909036	1.25216717913479e-08	2.10961204254369e-06
ENSG00000134765	134.036304499893	-4.36511868980067	0.767020872204863	-5.69100378879232	1.26294705249637e-08	2.10961204254369e-06
ENSG00000186481	41.0252076333344	3.93283074591179	0.694862667023457	5.65986767249797	1.51489759498565e-08	2.50613587708923e-06
ENSG00000135925	75.2120039874158	-4.25667951908641	0.752377643708637	-5.65763689907676	1.53471390741497e-08	2.51473835972139e-06
ENSG00000159184	14.2563018962445	7.82052777915238	1.38911200517357	5.62987559680272	1.80339647349031e-08	2.92711663456612e-06
ENSG00000167555	529.497946120418	1.26677503847979	0.225864819932807	5.6085539963977	2.04024046814361e-08	3.28059226676737e-06
ENSG00000069667	481.704522507876	-1.92354203682406	0.343805787828302	-5.59485065383683	2.20811760551262e-08	3.51765401878191e-06
ENSG00000174099	85.3578106689706	2.47279619972256	0.442313518941234	5.5905960225717	2.26291502805052e-08	3.53940482341902e-06
ENSG00000239893	19.5550215663801	-8.16810437411814	1.46067388396625	-5.59201096410298	2.24454642689386e-08	3.53940482341902e-06
ENSG00000228630	34.6818356222795	-3.05815448889251	0.547579521802687	-5.58485912479846	2.33889727528899e-08	3.62529077669794e-06
ENSG00000172594	440.840759797158	-2.00109464257965	0.360158588366451	-5.55614861679655	2.75792079485588e-08	4.23660957816924e-06
ENSG00000244694	82.4636326101817	2.40777394575061	0.434051172426666	5.54721216922277	2.90260437803117e-08	4.41940781628551e-06
ENSG00000110031	282.918484719886	2.21958230457639	0.400761109081729	5.53841741196436	3.05217116921813e-08	4.60636885670157e-06
ENSG00000141934	355.78698196992	1.95323049430704	0.353171154111896	5.53054934290641	3.19229483643374e-08	4.77595066616021e-06
ENSG00000112276	41.0513647069417	4.50599603448886	0.816157078414459	5.52099118375916	3.3709269504584e-08	4.99972398126179e-06
ENSG00000184500	520.642261847367	-1.6855897792909	0.305577760064253	-5.51607479201522	3.46654778797091e-08	5.09760296513158e-06
ENSG00000117472	5554.02532143327	2.39979270118619	0.435877357547526	5.5056603873362	3.67786940638989e-08	5.31745740646538e-06
ENSG00000211448	2646.51251588121	-6.21055282792929	1.12783387677697	-5.50662021757786	3.6578820246834e-08	5.31745740646538e-06
ENSG00000166510	148.179389652271	2.59763045791879	0.472361980246177	5.49923695502547	3.81438265050664e-08	5.4688711251639e-06
ENSG00000198053	1953.67322753389	1.08524499579068	0.19742879052271	5.49689329969251	3.86540418696019e-08	5.49622140798761e-06
ENSG00000231574	63.5203146607967	2.99800119486704	0.546650763471583	5.48430807235648	4.15090859871232e-08	5.80620995454028e-06
ENSG00000167755	421.371135348399	-2.38734311846464	0.435253734970199	-5.48494573775019	4.13596351875677e-08	5.80620995454028e-06
ENSG00000130045	23.2464474691896	3.96929036016903	0.72510213966579	5.47411204992242	4.39710789079783e-08	6.10098719848199e-06
ENSG00000180891	1200.4407434124	1.89963320144187	0.347622507356847	5.46464386292408	4.63837079252572e-08	6.3842535588324e-06
ENSG00000129925	1309.84836850456	0.858276845652646	0.157672148933686	5.44342708244322	5.22651339023416e-08	7.13667959356974e-06
ENSG00000172331	1342.56215610833	1.44016053807883	0.264990329564982	5.43476639484561	5.48682676039858e-08	7.43313814272895e-06
ENSG00000134780	97.0229373502172	3.54349571064323	0.65286331931995	5.42762260611346	5.71096352185895e-08	7.67633807762368e-06
ENSG00000115507	129.204541529529	-1.72770972629769	0.318584325812149	-5.42308452210679	5.85792757798884e-08	7.81284061855023e-06
ENSG00000108511	22.9264250160463	6.745321581034	1.24467884833496	5.41932691316913	5.98238369887218e-08	7.9174547337766e-06
ENSG00000243766	12.4676747668889	7.7251503243179	1.42633715385586	5.41607592807512	6.09212388099349e-08	8.00114437957962e-06
ENSG00000249992	151.719673155494	2.53752257310196	0.469207879758596	5.4080988034717	6.36972842425529e-08	8.23993816085054e-06
ENSG00000132821	291.046853418797	3.44868439423465	0.637681231398449	5.40816355324056	6.36742655197469e-08	8.23993816085054e-06
ENSG00000198478	2849.11888834461	-1.99035277069821	0.368668793621405	-5.39875575349658	6.7104656286317e-08	8.56718234632329e-06
ENSG00000121039	4186.59846458486	2.08442654611318	0.386116467710201	5.39843990201849	6.7222878044385e-08	8.56718234632329e-06
ENSG00000172548	1316.77784070711	-2.24458676116287	0.415891535288059	-5.39704843862282	6.7746103098849e-08	8.57038017511542e-06
ENSG00000170915	417.38089240682	3.13352531823825	0.581309849993822	5.39045625714334	7.0279021609205e-08	8.82591654588593e-06
ENSG00000153802	3982.47563395989	1.65812264060862	0.311309465976276	5.32628404153628	1.0024233455593e-07	1.24976041017013e-05
ENSG00000154240	63.9544956626702	2.7897237207596	0.524791758014255	5.31586801461128	1.06150074214872e-07	1.31389354450855e-05
ENSG00000256612	104.115155142805	6.65061209073984	1.25265574078722	5.30920976465593	1.10101559161807e-07	1.35306951812778e-05
ENSG00000223764	53.4165254549353	4.81157270978205	0.906592980162282	5.30731300050522	1.11253045046701e-07	1.35752385817623e-05
ENSG00000163975	634.924993638278	1.97499844029822	0.3729920279727	5.29501515362889	1.19006541486119e-07	1.44190672272442e-05
ENSG00000158966	114.161177134794	-2.05623051613213	0.389074278809017	-5.284930482751	1.25752501937826e-07	1.51298726981839e-05
ENSG00000110092	13396.3646344275	1.52185851089556	0.28837703347237	5.27732216595318	1.31085312448763e-07	1.56619638936178e-05
ENSG00000152056	993.994472050994	1.29002809113514	0.244539598152419	5.27533414171668	1.325144133859e-07	1.57235205676166e-05
ENSG00000121578	1131.6721872784	1.49426697662059	0.283477727793981	5.27119709985314	1.35536822325029e-07	1.59719933431652e-05
ENSG00000114374	705.092301502412	-7.05258652793915	1.34598946702491	-5.23970409926591	1.608342772521e-07	1.88241751028733e-05
ENSG00000026559	548.84475926345	-1.86145344246985	0.357643728827664	-5.20477025718189	1.94236756600264e-07	2.25800229547807e-05
ENSG00000178947	86.1925391694644	2.08687838983124	0.401233441015317	5.20115767157996	1.98050991614058e-07	2.28689081256367e-05
ENSG00000108309	194.821667137284	-2.06061034348372	0.396614745666591	-5.19549604748165	2.04174674445149e-07	2.34188351588586e-05
ENSG00000173546	242.754528248028	1.94376522152338	0.374348353805581	5.19239687249403	2.07603869754103e-07	2.34988459152589e-05
ENSG00000134762	15493.0157586127	-1.23972532255453	0.238711983957256	-5.19339373751977	2.06494824451484e-07	2.34988459152589e-05
ENSG00000276600	541.37524912354	-1.2543686802535	0.241931313674489	-5.1848132480329	2.16231426310197e-07	2.40168533382381e-05
ENSG00000128713	31.4155619885928	4.95494071713157	0.955685959456883	5.18469552482226	2.16368048092235e-07	2.40168533382381e-05
ENSG00000140526	2481.61366130933	1.25761979471409	0.242527108699709	5.18548133219714	2.15457669491417e-07	2.40168533382381e-05
ENSG00000121005	68.3837500537932	3.84537856858225	0.743568734124318	5.17151729504987	2.32200776122413e-07	2.56090663665777e-05
ENSG00000126016	130.051873065151	-3.11551836350637	0.603020672297147	-5.16651999945227	2.38492694195774e-07	2.61354573480146e-05
ENSG00000147614	36.2296147594564	3.37872267080179	0.654532930848138	5.16203618116458	2.44278059996978e-07	2.66000254572659e-05
ENSG00000141526	4804.37682782351	1.48446016294982	0.288812555072744	5.13987407014187	2.74922658733502e-07	2.97487065629554e-05
ENSG00000109339	450.159883989829	1.57122678840668	0.306564469330347	5.12527362299629	2.97105948823503e-07	3.19481740594273e-05
ENSG00000048052	164.409973857302	2.12460275848586	0.415263925905567	5.11627094468351	3.11635318726297e-07	3.33023953955649e-05
ENSG00000196344	301.256032860027	2.94985043966659	0.577619912332663	5.10690572932969	3.27477018691622e-07	3.45713613378888e-05
ENSG00000136111	475.633565597816	-1.02790252350524	0.201278148929674	-5.10687587783999	3.27528735720772e-07	3.45713613378888e-05
ENSG00000108924	15.5062479963865	-7.05092580723262	1.38587851462275	-5.08769400263916	3.62443546793977e-07	3.80234220889657e-05
ENSG00000166165	1059.10422914675	1.34309156512646	0.26450260523325	5.07780089327312	3.81828519441595e-07	3.98143010726827e-05
ENSG00000188039	31.9740271711389	2.59677066867475	0.511649036342445	5.07529670580038	3.86891807775127e-07	4.00992382697052e-05
ENSG00000078900	85.1291083333432	-2.08866564196943	0.411702233151404	-5.07324341182605	3.91091707114673e-07	4.029181329885e-05
ENSG00000106077	419.273560274369	1.3082019525422	0.258265604712369	5.06533556413425	4.07681560139221e-07	4.1750959774972e-05
ENSG00000167244	24.3356833431879	4.01242807172638	0.794349234221656	5.05121412455059	4.39010600051387e-07	4.46933572419178e-05
ENSG00000244300	36.8728018199987	3.52162596132724	0.699050482957392	5.03772767086678	4.71091052874058e-07	4.76771856746952e-05
ENSG00000197915	21.2377485906007	-3.142410195336	0.624396561466624	-5.03271540758472	4.83580752683582e-07	4.86550108182516e-05
ENSG00000079257	409.462254190284	1.55550412692172	0.310005370147916	5.01766832677615	5.23023703492541e-07	5.23175745266812e-05
ENSG00000176153	1653.8214266926	2.66105863751418	0.531704380252279	5.00477095233179	5.59284926745566e-07	5.56213708939738e-05
ENSG00000013810	907.093294658625	-1.40295574426118	0.280489911012195	-5.00180466098897	5.67961234328665e-07	5.61596151530154e-05
ENSG00000026025	1543.20442122895	2.22070907390723	0.444233327607792	4.99896999143626	5.76373710869599e-07	5.66657696886369e-05
ENSG00000183844	131.00510697062	-4.0659456144449	0.814221937273886	-4.99365766053685	5.92463778460937e-07	5.79167006160251e-05
ENSG00000226476	51.847687271522	9.69170664082301	1.94244433161587	4.98943855588424	6.05550310635175e-07	5.88615429066564e-05
ENSG00000113504	126.947292223488	2.12359885206762	0.42597129863912	4.98530971183276	6.18626373082904e-07	5.94607080943651e-05
ENSG00000173221	479.082382705432	1.80940310793787	0.362875537764882	4.98629122007733	6.15493494821029e-07	5.94607080943651e-05
ENSG00000188290	1126.69333543992	1.50822656172724	0.304015961353289	4.96101110946136	7.01271805177845e-07	6.70298967115824e-05
ENSG00000172575	285.576068889535	-1.24541847981479	0.251298957309469	-4.95592378555349	7.19874321607365e-07	6.84278326146669e-05
ENSG00000123407	10.2076388058631	-7.35766601555048	1.48545248083325	-4.95314802088	7.30223840387964e-07	6.9030226230082e-05
ENSG00000119699	247.291970556125	1.99023496992611	0.402079070473172	4.94985965716638	7.42670157400081e-07	6.98231697162207e-05
ENSG00000183508	75.6172092083403	2.56081237535993	0.518448849106185	4.93937324728335	7.83740687529441e-07	7.32840137442611e-05
ENSG00000101335	170.981799741773	2.50518714598217	0.507328791878089	4.93799521353436	7.89297795122402e-07	7.34046949463834e-05
ENSG00000170537	205.194081541458	1.81706193930579	0.368148465227144	4.9356770730653	7.987317389254e-07	7.38826858505995e-05
ENSG00000065320	476.700319452223	2.67871767576101	0.542913738599179	4.93396553690575	8.05766633507904e-07	7.41348391952058e-05
ENSG00000258976	20.2518116885119	4.44077264486869	0.902490442674689	4.92057581430743	8.62899661659295e-07	7.89690887172775e-05
ENSG00000000971	821.870949227109	2.32853299938814	0.473719746654386	4.91542312904042	8.85909075826145e-07	8.06458499978245e-05
ENSG00000143753	1329.90021829506	-0.990925174641535	0.201691727008709	-4.91306802384982	8.96621510180286e-07	8.11914372771148e-05
ENSG00000111674	131.767202598722	2.00748407598752	0.409012074510952	4.90812912647586	9.19493102188334e-07	8.28265906971219e-05
ENSG00000103811	2165.5781051543	1.79929504783512	0.367360160404858	4.89790467712168	9.68640015175681e-07	8.67992263598833e-05
ENSG00000198759	65.1525302692372	4.05699206323751	0.829524836067955	4.89074212951613	1.00456500727773e-06	8.95520256487734e-05
ENSG00000248485	371.178490243669	-2.00886034201732	0.411340860302424	-4.88368780222898	1.04119886264483e-06	9.19772912189168e-05
ENSG00000159674	525.558167659524	2.70565863921772	0.554046699519556	4.88344870850047	1.04246276010978e-06	9.19772912189168e-05
ENSG00000119866	301.632266545297	-1.48161701520289	0.303768988001942	-4.87744659172851	1.07467933366811e-06	9.43360098763257e-05
ENSG00000181790	204.361977420583	3.63264852641914	0.745288589149482	4.87415020074934	1.09277826226695e-06	9.54378172705728e-05
ENSG00000129993	155.830308936645	2.60430863362633	0.535346685200282	4.86471422280687	1.14622300381697e-06	9.95998322256108e-05
ENSG00000106415	186.32284721333	1.6552993358144	0.341064882580941	4.85332680189251	1.21407375876629e-06	0.00010444069509787
ENSG00000203485	2668.90331767682	1.10140550734179	0.226897051958219	4.85420809938334	1.20868760971986e-06	0.00010444069509787
ENSG00000144711	783.985475552295	1.00890941456148	0.207969064786701	4.85124754297592	1.2268730449787e-06	0.000105016670342579
ENSG00000170271	162.275425602247	1.41433003383041	0.291726739632808	4.84813300148831	1.2462883638186e-06	0.000106150451977718
ENSG00000162909	15148.6434384265	0.775536628724218	0.160512642640198	4.8316233286536	1.35424287863881e-06	0.000114135394006196
ENSG00000156113	212.941102802506	3.07393940049836	0.63632259833716	4.8307877302035	1.35993930667074e-06	0.000114135394006196
ENSG00000166147	191.267983621235	2.00425216957182	0.414781823556419	4.8320636434523	1.35125041115442e-06	0.000114135394006196
ENSG00000101160	1807.26923219719	1.43274488410489	0.296722430455853	4.8285695217034	1.37517324701045e-06	0.000114853668518518
ENSG00000119900	1772.95601832658	-1.54894119599699	0.321252665340634	-4.82156683230815	1.42434982971585e-06	0.000118386177875658
ENSG00000138623	312.240029306566	1.81619945196603	0.376847991862222	4.81944840143939	1.43955677392931e-06	0.000119074876420451
ENSG00000152527	135.878116214255	2.22687178602418	0.46411686187085	4.79808420889448	1.60190433924498e-06	0.000131869684960334
ENSG00000234380	17.0312628698331	5.04890503868484	1.05308061872957	4.79441454802938	1.63150589004969e-06	0.000133666946849071
ENSG00000121440	509.882527482126	4.16369630699516	0.872423942682228	4.77256079675446	1.81898173782152e-06	0.000147565440405648
ENSG00000047936	82.2321493095926	3.82825035583492	0.802112450773612	4.77271030033593	1.81763152900974e-06	0.000147565440405648
ENSG00000188508	2079.71631757189	-6.62021681337814	1.38739498522527	-4.7716885846342	1.82687816369678e-06	0.000147565440405648
ENSG00000205476	1755.87815785434	-0.947078189543035	0.1985251763159	-4.77056969356881	1.83705609505714e-06	0.000147694159418028
ENSG00000142156	1520.23743431076	1.96506786711209	0.412337229713834	4.76568140227325	1.88216470062965e-06	0.00015061694732248
ENSG00000258837	12.9777560507915	7.52881131348477	1.58047564612565	4.76363639765076	1.90134983677859e-06	0.000151447796026739
ENSG00000189337	1161.05313840101	-1.16860945701258	0.24548262058488	-4.7604569896976	1.93155095589052e-06	0.000153144397217034
ENSG00000228314	85.9510144693561	4.1195742618927	0.865760465294623	4.75833030847717	1.95200891456916e-06	0.000154056483372305
ENSG00000134830	367.905160744966	2.0376071386655	0.428384116459677	4.75649553840846	1.96982590548986e-06	0.000154752761205265
ENSG00000069188	702.653732016899	0.989635836952226	0.208136366797888	4.75474734270354	1.98694746646957e-06	0.000155388323457313
ENSG00000162723	93.7640431682708	2.13205412014197	0.449204330427632	4.74629021966975	2.07181386020753e-06	0.000161292115225658
ENSG00000170423	5035.64157845469	-2.78778044572201	0.587685331625417	-4.7436617790197	2.09889175062274e-06	0.000162664110673263
ENSG00000243244	102.189450055447	2.623615523077	0.553399054591479	4.74091074299678	2.12759654233473e-06	0.000164132918317655
ENSG00000152952	1894.69949015534	1.84183387243625	0.38857096181323	4.74001933608602	2.1369782448829e-06	0.000164132918317655
ENSG00000113389	236.313444655521	2.86540301004999	0.604627413209635	4.7391218913465	2.14646362228842e-06	0.000164132918317655
ENSG00000115935	80.666120510897	2.202826297467	0.465645560918073	4.73069321894505	2.23754442956457e-06	0.000170340495179904
ENSG00000128274	2344.47365530958	1.41492248236821	0.299316962339283	4.72717106077124	2.27669459215013e-06	0.000172557402898427
ENSG00000133466	785.631157250462	1.062894103679	0.22525751176492	4.71857340228565	2.37504273527477e-06	0.000179221974826326
ENSG00000166634	113.153312459483	-3.50686867688285	0.744520341841194	-4.71023890121039	2.4742659108638e-06	0.000185894082953762
ENSG00000146411	216.664275410436	1.8635473532152	0.396039010022174	4.70546412362475	2.53289047383e-06	0.000189471220009761
ENSG00000171345	40186.7807879291	2.09124858372479	0.446030633378152	4.68857613632064	2.75112558813056e-06	0.000204022050619768
ENSG00000120075	13.7645554726686	7.77440675673044	1.65787850917734	4.68937061050884	2.7404665378028e-06	0.000204022050619768
ENSG00000132429	34.3013574113328	4.42404695554891	0.944692083997082	4.6830570833518	2.82627764111428e-06	0.000208695737405026
ENSG00000007237	223.805538491075	-3.41517996728759	0.72967350132733	-4.68042208066365	2.86284904799854e-06	0.000210492811413739
ENSG00000169550	878.048746974973	-2.12733484784069	0.455011598144144	-4.67534202758227	2.9346410526831e-06	0.000214853188559203
ENSG00000055732	25.8638088355796	-3.1228500372485	0.669627629709435	-4.66356210331938	3.10782337763284e-06	0.000225067429166537
ENSG00000170961	153.045542610559	3.70193722026723	0.793658754839387	4.66439410854404	3.09527668169486e-06	0.000225067429166537
ENSG00000070404	2560.03400265717	1.29166727695258	0.276992006339929	4.66319333189503	3.11340006635489e-06	0.000225067429166537
ENSG00000117266	684.430402055346	1.5772466321039	0.338474188042628	4.65987271060462	3.16404988126469e-06	0.000227771875343761
ENSG00000257042	26.1669559693607	6.48959221456592	1.39370075697705	4.65637417650681	3.21826808991431e-06	0.000230709593695732
ENSG00000168916	343.024183802373	2.28256137789904	0.490744622889631	4.65122035257102	3.29976511596361e-06	0.000235570368548356
ENSG00000130066	21306.4881396101	1.06236205934576	0.228534580448282	4.6485834102738	3.3422246487112e-06	0.000237615599508579
ENSG00000106560	39.0803514325088	3.94529806777494	0.848872527443992	4.64769201525991	3.35669584450898e-06	0.000237662353929123
ENSG00000077092	106.785215668316	3.55822554597566	0.76697238505209	4.63931376842727	3.49567979677241e-06	0.000245285405593176
ENSG00000196782	551.14008131197	-1.34398184253902	0.289736325094807	-4.63863770653973	3.50713221597915e-06	0.000245285405593176
ENSG00000169902	911.525279246558	1.40071004854938	0.301963171042296	4.63867843126201	3.50644132626913e-06	0.000245285405593176
ENSG00000104447	984.170811601265	1.06552524900806	0.229838408794114	4.635975573441	3.5525792037022e-06	0.000247457996759904
ENSG00000280693	157.271790206397	-1.99067968947178	0.429618928222824	-4.63359400319371	3.59371460377817e-06	0.000249313950637111
ENSG00000006625	673.416343333544	-1.19094405360458	0.25736140408299	-4.62751614931562	3.70077382652971e-06	0.000255710095122263
ENSG00000137486	295.031595692933	-1.60995514601515	0.348030982707863	-4.62589604376271	3.72982352455981e-06	0.000256686454960206
ENSG00000110719	2036.88053061676	1.67144947367811	0.361499581928469	4.62365534355956	3.77036140149089e-06	0.000258442501644027
ENSG00000110811	149.212514139557	2.31336812622222	0.501318141768519	4.61457093505784	3.93908226057321e-06	0.000268936151956992
ENSG00000086062	11361.437296166	0.987415362957793	0.214035471786846	4.61332579461942	3.96276411419118e-06	0.000269483622864266
ENSG00000054219	84.595744829277	2.88496848510343	0.62720047043292	4.59975497644654	4.2298817018046e-06	0.00028651619952578
ENSG00000123146	595.471525283046	1.33974116297175	0.291723418204582	4.59250467863437	4.37957688772774e-06	0.000295492628836689
ENSG00000077782	207.081156861977	2.13632762287492	0.465430085854772	4.59000758180793	4.43229909637606e-06	0.000297537570918168
ENSG00000134339	3139.42095794285	2.48367331189502	0.541267526398892	4.58862427683249	4.46176653861595e-06	0.000297537570918168
ENSG00000183196	141.73315825601	2.42118571955168	0.527563145080492	4.58937615739302	4.44572662230731e-06	0.000297537570918168
ENSG00000158856	398.514140203767	1.24626667491606	0.272154015897216	4.5792698329564	4.66601932615492e-06	0.000308764855794213
ENSG00000188921	244.368748192947	1.47558588912634	0.322227368067172	4.5793313521983	4.6646472610603e-06	0.000308764855794213
ENSG00000140682	177.817886224268	1.68073469537181	0.367551676486222	4.57278473448839	4.81284533873881e-06	0.000317260551927208
ENSG00000197083	27.1933149496631	-5.56103407653863	1.21766588221609	-4.5669622166122	4.94843163278139e-06	0.00032495330626719
ENSG00000128683	28.0889399257291	3.65287887117696	0.800580034845494	4.56279036721412	5.04782101104692e-06	0.000328968789754024
ENSG00000145358	47.1113705564578	1.79617584127928	0.393629209344074	4.56311624910242	5.03998893529167e-06	0.000328968789754024
ENSG00000163132	15.0420030606794	3.9727602363921	0.875565160894136	4.53736673617195	5.69610020400866e-06	0.000369816618905543
ENSG00000180861	152.355918564588	3.58314511053603	0.789953838427782	4.53589176510294	5.73605932182196e-06	0.000371010904631379
ENSG00000261115	77.4033718064378	4.00167110953809	0.882474708463738	4.53460146920746	5.77123522192557e-06	0.000371888022446552
ENSG00000162493	3658.78002919061	1.24551930233901	0.274730092654351	4.53361075339516	5.79838403522863e-06	0.000372243273604883
ENSG00000246223	27.2552296485357	-3.33876343207654	0.736631720209535	-4.53247306690353	5.82971110545021e-06	0.000372863121075357
ENSG00000159267	478.569261325788	0.891552949426396	0.196776854170627	4.53078159615928	5.87658668329604e-06	0.000374469162541142
ENSG00000166387	749.264354277672	-0.979701445277621	0.21629497043725	-4.52946937830829	5.91320032381015e-06	0.000375411850816065
ENSG00000014257	365.484586217817	-2.4471415187569	0.54073801419944	-4.52555850429691	6.02362142707946e-06	0.000381016200929787
ENSG00000197712	1901.31880205595	1.08744804802604	0.240739728793946	4.51711087934642	6.26890835225316e-06	0.000395079004397493
ENSG00000158186	204.599230428695	1.4226738762186	0.315194194807008	4.51364238192806	6.37236341535596e-06	0.000400133257522625
ENSG00000172638	297.826242034529	2.26879176055958	0.503250196384273	4.50827794377486	6.53559227386831e-06	0.000408890418443288
ENSG00000261838	11.5148227107798	4.65471774802743	1.0331073302624	4.50555098359933	6.62009414668627e-06	0.000412676520991802
ENSG00000067646	246.204481949148	-7.39372173005427	1.64457269109969	-4.49583151299336	6.92985956500522e-06	0.000430426836880559
ENSG00000058091	770.301665886098	1.35729019045688	0.302208074664001	4.49124396151867	7.08083871843298e-06	0.000438222410613811
ENSG00000189134	14.3099529343557	-6.28382084753665	1.40199446312407	-4.4820582483146	7.39265580529357e-06	0.000455650393777656
ENSG00000139055	68.7726154725445	-2.82663548865075	0.630747952909033	-4.48140255646365	7.41540890774447e-06	0.000455650393777656
ENSG00000253910	38.2884530809274	2.69149039505302	0.602547883973468	4.46684897024969	7.93801279986689e-06	0.000484231293932632
ENSG00000124615	193.346127800109	-1.21033793479102	0.270926101378646	-4.46740985321106	7.91723564949691e-06	0.000484231293932632
ENSG00000124134	30.9406891358981	-2.61412725644544	0.585323599445628	-4.46612311364404	7.96497856337896e-06	0.000484231293932632
ENSG00000127152	442.522950894294	-1.68595064054884	0.377945035760705	-4.46083552111078	8.16407324234357e-06	0.000494587606107469
ENSG00000117643	16.9585695629679	2.82082662523305	0.633303491828778	4.45414664790084	8.42275185875183e-06	0.000507779384010003
ENSG00000210196	2321.70384188871	2.46429626741689	0.553316130981109	4.45368593004391	8.44085462521714e-06	0.000507779384010003
ENSG00000164362	298.714508620389	2.16937070451551	0.487468194117653	4.45028153773643	8.57577909832208e-06	0.000512955577614296
ENSG00000106537	1388.23389640241	1.00057946381132	0.224886306748533	4.44926806917669	8.61634187332355e-06	0.000512955577614296
ENSG00000160360	480.99879774747	1.7268815476344	0.388115760531417	4.44939815190681	8.61112524118794e-06	0.000512955577614296
ENSG00000108821	4765.81926571274	1.33082918655246	0.299167368105417	4.44844367545968	8.64947234322763e-06	0.000513152316087005
ENSG00000092377	18.2540608722945	-7.42699490043347	1.67080338276148	-4.44516391160177	8.78248802855538e-06	0.000519253287049125
ENSG00000118922	154.861733537847	2.06910524378806	0.465885214020671	4.44123398107297	8.94444724873436e-06	0.000527017859296146
ENSG00000100304	2851.34628159876	-0.684800873773807	0.15433479844695	-4.43711256738511	9.11736205052286e-06	0.000535372744297767
ENSG00000251442	57.013722280468	-1.96851519064409	0.443763190390672	-4.43595871237333	9.16634168164289e-06	0.000536418056573694
ENSG00000088340	227.305432252451	2.52185429881228	0.570060411398607	4.42383692743208	9.69632213226537e-06	0.000565509228086867
ENSG00000127507	876.831645783512	-1.22491257874433	0.277485215370695	-4.41433456952998	1.01321160451059e-05	0.00058892924512178
ENSG00000172243	296.074057592303	-2.08048669846894	0.471569641685481	-4.41183340605406	1.02498968007711e-05	0.000593769274266894
ENSG00000189431	256.734998723968	-1.62220671059958	0.368046313619543	-4.40761570098618	1.04514772827176e-05	0.000603414988755561
ENSG00000116711	452.046321669684	-1.66862455734761	0.378826813909904	-4.4047160762608	1.05922516055517e-05	0.000605686261402144
ENSG00000123384	5373.8568191331	1.57390217760016	0.357292027494335	4.405086194164	1.05741824090441e-05	0.000605686261402144
ENSG00000165389	2312.11531008558	-0.934237746022283	0.21210354122068	-4.40463059053913	1.05964292172069e-05	0.000605686261402144
ENSG00000136542	6315.25076043599	1.71209945670824	0.388799793594139	4.4035503231143	1.06493566800179e-05	0.000606695965826848
ENSG00000106541	1029.97424676922	2.11340215162728	0.480672553603183	4.39676061340499	1.09878412777497e-05	0.000623913561662322
ENSG00000106366	21774.6469068582	1.78947499783296	0.407159338810137	4.39502383283761	1.10760601084693e-05	0.000626853993967812
ENSG00000162543	16.3208813296101	5.63904127395036	1.2852381981341	4.38754565662386	1.14636934486919e-05	0.000646665068146704
ENSG00000138696	154.144561367255	1.95458945485511	0.445777208653399	4.38467785457116	1.16157546667055e-05	0.000653101500132902
ENSG00000177508	1007.21214528799	-1.95930778572955	0.447017764414253	-4.38306470503898	1.17021337867942e-05	0.000655815022155682
ENSG00000162614	34.7367138028323	1.96166809852075	0.448723552882433	4.37166287777791	1.23303813672787e-05	0.000685925719394577
ENSG00000011028	1715.20222458194	1.23596576390822	0.282682994113503	4.37226783940158	1.22962543734754e-05	0.000685925719394577
ENSG00000230978	15.9024375815191	4.13690265157223	0.946409203689853	4.37115640406211	1.23590219710735e-05	0.000685925719394577
ENSG00000213853	2306.6399604466	-1.53881553920108	0.352573061230908	-4.36452953560532	1.27396636826596e-05	0.000704777857428164
ENSG00000165795	3843.29228798292	-1.66627924664413	0.381946456074754	-4.36259905058003	1.28526364300991e-05	0.000708748749294408
ENSG00000189058	22.4899796702045	6.42138408386865	1.47227864354163	4.36152769860311	1.29157441437055e-05	0.000709953284320937
ENSG00000146072	6609.31540307711	1.57874367009206	0.362215096410863	4.35858053884446	1.30908746904225e-05	0.000717288213530952
ENSG00000175544	7.28523613420456	6.94724253677759	1.59678692407328	4.35076366924131	1.35664211288954e-05	0.000740985001659191
ENSG00000129824	2555.85491690412	-5.68148525902546	1.30799367195964	-4.34366417882852	1.40125667267473e-05	0.000762931045992683
ENSG00000196878	37511.9760553416	1.61991846297512	0.373388924782172	4.3384212960257	1.43509858440436e-05	0.000778891834216939
ENSG00000198353	12.3668588247235	-3.94782849040106	0.910391256592845	-4.33640861751669	1.44829597716353e-05	0.000783582776323855
ENSG00000222041	125.092456858767	1.34882573494705	0.311420658061206	4.33120186484852	1.48297644484521e-05	0.000799831026130466
ENSG00000126705	1975.70024862448	0.871990327390533	0.201430240034438	4.32899413336076	1.49791923453275e-05	0.00080536563844175
ENSG00000142173	1681.4596329185	2.00895617334575	0.464933040265324	4.32095807215442	1.55353193892975e-05	0.000832664081286179
ENSG00000149591	430.809560130484	1.98156214037978	0.45990265669808	4.308655563346	1.64249929204196e-05	0.0008776149167572
ENSG00000159216	2943.14173086478	1.2468890469901	0.289633354979922	4.305060261711	1.66940286001957e-05	0.000889228365530548
ENSG00000169299	3501.1881941816	-0.705303224211	0.163893561406205	-4.30342240512383	1.68179766920832e-05	0.0008930657067509
ENSG00000160223	75.289074277771	-1.99888379248035	0.467176335863677	-4.27864949277659	1.88030685514661e-05	0.000995405521316844
ENSG00000083444	1664.26415991551	0.939451813002113	0.21974882507134	4.27511643212257	1.9103743205825e-05	0.00100822055784116
ENSG00000164120	6887.71803022962	1.77141661421002	0.414526147055961	4.27335314500891	1.92555122127932e-05	0.0010105969018181
ENSG00000126003	1188.06444001775	-0.802346441158763	0.18776116498538	-4.2732289247419	1.92662472418678e-05	0.0010105969018181
ENSG00000132321	199.278187786966	1.52748597719894	0.357902589089216	4.26788188676159	1.97337759536331e-05	0.00103197451453574
ENSG00000010932	27.3962264012257	-6.25524442596669	1.46806212925758	-4.26088535444345	2.03618669581156e-05	0.00105654900126829
ENSG00000183439	7.64581053471706	-6.86673645853676	1.61158167523575	-4.26086779469757	2.03634670138312e-05	0.00105654900126829
ENSG00000149090	37.3958230179856	2.23677473066542	0.524990605985181	4.26059953295346	2.03879260924774e-05	0.00105654900126829
ENSG00000271122	198.396335611635	-1.01101134011309	0.237492344339015	-4.25702707565971	2.07163274839178e-05	0.00106713896515211
ENSG00000139144	22.3087858285525	-4.30052480938157	1.0101888694632	-4.25714927117224	2.07050118375461e-05	0.00106713896515211
ENSG00000105880	129.27217328293	-1.95550538012099	0.459610091674628	-4.25470505444286	2.09324754256072e-05	0.00106867430177321
ENSG00000182195	222.681425511842	-2.19144719293835	0.514977349587138	-4.25542442729812	2.08652832962006e-05	0.00106867430177321
ENSG00000182534	1765.29720081535	1.24241047961303	0.291988279778813	4.25500119578149	2.09047898022409e-05	0.00106867430177321
ENSG00000269994	22.5876822628433	6.18739062138978	1.45519741890952	4.25192523089163	2.11940625269533e-05	0.00107882794608352
ENSG00000166016	383.188697139364	-1.43964942151486	0.338725302169884	-4.25019746766014	2.13582136808145e-05	0.00108078843052474
ENSG00000102837	286.507725344991	7.43579550334007	1.74951081570812	4.250214080746	2.13566295592207e-05	0.00108078843052474
ENSG00000034693	412.924773689403	-0.91050852260155	0.214608811989085	-4.24264276085672	2.20902928052419e-05	0.0011145556824463
ENSG00000136205	688.454117233183	1.31789391010732	0.311023749111989	4.23727742293015	2.26246519344584e-05	0.00113817876179052
ENSG00000114378	551.964947173631	2.10848093980574	0.497705408214939	4.2364035130098	2.27128454283251e-05	0.00113928427286978
ENSG00000175121	159.351330187857	-4.68356219192099	1.10575640327345	-4.23561842197422	2.27923543774615e-05	0.00113994900309368
ENSG00000111666	118.592777493325	1.69922536207641	0.401498474979515	4.23220875786167	2.31407466436654e-05	0.0011540189739254
ENSG00000168785	584.436169176337	1.17695886383872	0.278282818581761	4.22936230787429	2.34354662441053e-05	0.00116533871887234
ENSG00000176728	19.4956057281834	-7.22668514946318	1.71207197421944	-4.22101714079978	2.4320244079456e-05	0.00120584956595689
ENSG00000143631	341.573780619053	-1.30890443454453	0.310287499348411	-4.21836018947966	2.46085485982553e-05	0.00121663815699133
ENSG00000006210	49.9043714858271	3.47875126951469	0.825940828328583	4.21186500315583	2.53270897049871e-05	0.00124857472313554
ENSG00000138061	907.065394279854	1.80081294736145	0.42777166877209	4.20975272282675	2.55650335651002e-05	0.0012531569448879
ENSG00000175928	35.4244239654581	4.03710936792793	0.958991035802852	4.20974672046661	2.55657127379048e-05	0.0012531569448879
ENSG00000116661	336.899261224871	1.52557878008741	0.362659804646961	4.20663873012482	2.59196994049498e-05	0.00126689894392659
ENSG00000131188	142.477609894278	1.20099814371145	0.285616929607754	4.20492631638051	2.61167226761172e-05	0.00127291278652294
ENSG00000130159	444.386016626286	-0.802015415401915	0.190782051715211	-4.20383053956838	2.62435446834152e-05	0.00127548075219819
ENSG00000107984	145.899864998435	2.13593235530439	0.508392112360574	4.20134833600544	2.65329971784973e-05	0.00128591610269309
ENSG00000111057	2719.91896392262	1.05075994185639	0.250166805561868	4.20023727567057	2.66635404532063e-05	0.0012886129592624
ENSG00000112584	20.4715667403038	-3.72145806598433	0.886550898156638	-4.19768123152566	2.69661838286224e-05	0.00129958877527016
ENSG00000157227	14113.8715197708	1.15357635237327	0.27504987383177	4.19406246693586	2.74002472572675e-05	0.00131681914542259
ENSG00000111860	92.6662683749594	1.82170437896889	0.434683811932911	4.19087237426282	2.77883944635973e-05	0.00133175299929301
ENSG00000183734	23.1265826842242	-3.60384171483095	0.861062098381175	-4.18534472903439	2.84733648117252e-05	0.00136078955996037
ENSG00000088538	170.117241626196	-1.62611504961657	0.388873745476828	-4.1816015314242	2.89462938467234e-05	0.00137722613357604
ENSG00000164099	1184.11986994547	0.9744233925306	0.23307492100289	4.1807303348545	2.90574301940193e-05	0.00137722613357604
ENSG00000182010	546.924294502	1.68245338272899	0.402407124079406	4.180973153937	2.90264136741336e-05	0.00137722613357604
ENSG00000182636	157.488274213926	2.22901927345443	0.533394394471142	4.17893269325504	2.92880340348306e-05	0.00138434237793753
ENSG00000172782	18.442676522141	-2.92806039761618	0.701543967980416	-4.17373754355752	2.99642926869194e-05	0.00141242645391356
ENSG00000154262	32.01903613252	3.14239762922319	0.756812402039791	4.152148697291	3.29368128142025e-05	0.00154830017614304
ENSG00000088543	27.081569186234	2.37583701915551	0.57261666109089	4.14908817817021	3.33802221623106e-05	0.00156486845314047
ENSG00000118523	318.444467715527	1.43585231930979	0.347029150443538	4.13755535370624	3.51025782358738e-05	0.00164114091996796
ENSG00000168542	810.579085246706	1.52760903196608	0.369276219092217	4.13676525317922	3.52236128829511e-05	0.00164233674702215
ENSG00000123989	3086.81453808289	1.0000158469275	0.242295756218246	4.12725283569037	3.67122681453896e-05	0.00169339027732286
ENSG00000101846	2257.73854639077	2.26268351242218	0.548118321703081	4.12809319234524	3.65783875218517e-05	0.00169339027732286
ENSG00000106688	364.040108945827	2.9211737046003	0.707743401158827	4.1274474616327	3.66812201638728e-05	0.00169339027732286
ENSG00000251363	13.2970131016751	5.56463467378642	1.3479977659883	4.1280741067895	3.65814229680226e-05	0.00169339027732286
ENSG00000168497	124.030615601464	-1.78176084217866	0.431831377864648	-4.12605691367136	3.69035977051768e-05	0.00169766416715927
ENSG00000106123	28.7789078228395	-3.25173165362544	0.78857985202633	-4.12352870196951	3.73111942531392e-05	0.00171183759233402
ENSG00000182621	89.6977078383417	3.12665834073699	0.759161528930231	4.11856794843504	3.81234161672376e-05	0.00174445046584395
ENSG00000236345	22.8469445509427	2.41196582269422	0.58586818680321	4.11690867847785	3.83988133474742e-05	0.00175239146854985
ENSG00000117983	11.5267855401917	6.57829357645205	1.59839590696156	4.11555957307031	3.86241218165694e-05	0.00175801062395259
ENSG00000145819	322.075936015263	1.32457798945268	0.322147521111806	4.1117125001653	3.92735166330894e-05	0.00178279859593989
ENSG00000006016	152.176580725279	1.95785707602099	0.476235504961849	4.11111111125122	3.93759643392711e-05	0.00178279859593989
ENSG00000171617	3369.05562998453	1.4077830568306	0.342599786457598	4.10911831378165	3.97172568032322e-05	0.00179353124225619
ENSG00000232756	17.866552435218	5.33362712694558	1.30270400215777	4.09427400093274	4.23493260989047e-05	0.00190738260610381
ENSG00000162817	48.7159182040375	1.8593650261277	0.455703825703709	4.08020499555039	4.4996001458163e-05	0.00200940905881158
ENSG00000179059	18.538369785179	-5.06113732857689	1.24041723012464	-4.08018947630092	4.49990057453749e-05	0.00200940905881158
ENSG00000204021	75.5478038845152	-2.66898474726575	0.654006088522937	-4.08097844057326	4.48465151920151e-05	0.00200940905881158
ENSG00000148848	19.4018129273398	3.98286571106704	0.97624944905745	4.07976231373285	4.50817725487515e-05	0.00200940905881158
ENSG00000135678	902.178941222765	-1.46307205466826	0.35905146908661	-4.0748254237482	4.60488784468711e-05	0.0020472117666109
ENSG00000141968	159.0512146191	1.76619662319639	0.433562854746121	4.07368067596707	4.62759205403681e-05	0.00205200312602328
ENSG00000092295	226.747502092146	-2.01738922645877	0.496348745841997	-4.06445920002579	4.81439592693612e-05	0.00212934914968987
ENSG00000130821	2865.06508745362	1.46922699783253	0.361540724607572	4.06379391817417	4.82814577209947e-05	0.00212995507715311
ENSG00000156127	11.8011079592875	4.81528002918345	1.18606087804142	4.05989280848304	4.90952493326132e-05	0.00215926178307182
ENSG00000180257	194.089266276196	1.09459860745479	0.269644726663868	4.05941039899988	4.91967811080589e-05	0.00215926178307182
ENSG00000197183	263.81552480648	1.79126910957237	0.441628974920191	4.05604978680594	4.99096253109754e-05	0.00218497481800339
ENSG00000106397	934.830612439748	1.11389898017416	0.274832772883367	4.0530063736135	5.05636243181988e-05	0.00220239786429015
ENSG00000074527	4914.41065440583	1.36312004071871	0.33629055736078	4.05339968929405	5.04786499919689e-05	0.00220239786429015
ENSG00000133131	541.383065999222	-0.965911170164766	0.238614569947538	-4.04799744783871	5.16577095874653e-05	0.00224437094306147
ENSG00000182054	2945.01606874669	-1.01965260163849	0.252021907945989	-4.04588874812031	5.21249852398596e-05	0.00225896818904732
ENSG00000116741	946.294967957574	1.47069746143916	0.363669245922517	4.04405233032134	5.25351852449343e-05	0.00226992365405911
ENSG00000260877	18.3674059460964	3.7451209860257	0.926189886051904	4.0435779340996	5.26416470775695e-05	0.00226992365405911
ENSG00000184319	172.660070398251	1.03966994331502	0.257399502683416	4.03912957280941	5.36499234051664e-05	0.00230761733046472
ENSG00000163430	1381.07090561618	1.51088292196866	0.374409014586897	4.03538072830775	5.45138270570263e-05	0.00233892866462877
ENSG00000068078	9958.38075825855	-1.09669197856624	0.272018911164041	-4.03167549591755	5.53806193726706e-05	0.00237020785150945
ENSG00000197757	35.3510406089176	-2.94469783470553	0.730589405237587	-4.03057834345123	5.56397794695305e-05	0.00237539058504534
ENSG00000109452	1879.16766377577	1.18166124445694	0.293277685149594	4.02915497595462	5.5977707648581e-05	0.00237801595084898
ENSG00000185633	2901.60143590292	2.46911381045028	0.612761332682757	4.02948697764617	5.58987121956336e-05	0.00237801595084898
ENSG00000153714	821.519119454178	1.43004502320116	0.355196522353866	4.02606707330448	5.67175166719994e-05	0.00240350954271367
ENSG00000090339	390.820102586912	1.67122334052258	0.415638145709671	4.02086131355699	5.79857370932937e-05	0.00245121524985287
ENSG00000276141	20.7496782245362	2.59767270541663	0.646685857657469	4.01690043884111	5.89686222164306e-05	0.00248665476772963
ENSG00000258498	32.4667554576019	4.37225577192971	1.08914033621757	4.01440992178651	5.95946972289325e-05	0.00250691140788211
ENSG00000114115	98.8366823688358	-1.77883686610321	0.443865771178244	-4.00760090461871	6.1338657680848e-05	0.0025677168014574
ENSG00000163293	1681.82335553826	-0.976799219274917	0.24373035974825	-4.00770433475688	6.13118088959618e-05	0.0025677168014574
ENSG00000229847	6.23141742934742	-6.62556250269936	1.65491931833274	-4.00355620319564	6.23973686906828e-05	0.00260569594253203
ENSG00000273179	19.154769025107	4.81269976728661	1.20256975990687	4.00201296235765	6.280585693386e-05	0.00261640379793477
ENSG00000177685	184.689426307443	2.11384120494689	0.52867313288647	3.99838969195514	6.37748903790428e-05	0.00264411418890918
ENSG00000132746	2825.08838658808	-1.77945891548086	0.445045343767874	-3.9983766607139	6.37784009530548e-05	0.00264411418890918
ENSG00000198853	340.668425823719	0.998909295622988	0.249891005214442	3.99737995677668	6.40474524589449e-05	0.00264888562393305
ENSG00000100311	159.212459107889	1.37195253846857	0.343416241640261	3.99501354949231	6.46905531736507e-05	0.00266906706799199
ENSG00000132329	31.2987528560973	-2.03706426007626	0.510198681824656	-3.99268820685889	6.53284442567286e-05	0.00268862131744359
ENSG00000168016	618.619113570381	1.41163447531311	0.353602595886527	3.99214963842095	6.54770317935986e-05	0.00268862131744359
ENSG00000151376	80.5100521807511	2.03335168965422	0.510101231971506	3.98617286571815	6.7147598838124e-05	0.00274411980524923
ENSG00000159182	5.89671730804957	6.65015711571542	1.66825538739023	3.98629440431103	6.71132294431204e-05	0.00274411980524923
ENSG00000175164	43.4849155720531	3.01826863473051	0.757414799346374	3.98496126209203	6.74911350403467e-05	0.00275162317149091
ENSG00000140044	555.024761463725	-0.990952153401599	0.248943419267616	-3.98063205011383	6.87322702657973e-05	0.00279559978705211
ENSG00000117791	19.6430323706083	4.25288550772024	1.06858295852396	3.97993012502725	6.89355274606994e-05	0.00279725412726729
ENSG00000065809	1630.50921797583	1.37010383791295	0.344377052677745	3.97849922711036	6.93516367385224e-05	0.00280751743549713
ENSG00000081985	21.9372872410644	-2.79023971668463	0.701495403442143	-3.97755951499226	6.96261993161179e-05	0.00281201586674603
ENSG00000069869	557.645314910952	-1.02615443473939	0.258079001057817	-3.9761252582867	7.00472400276055e-05	0.0028223952334308
ENSG00000110446	41.5059772837944	2.41423115690543	0.607373373750626	3.97487157199068	7.04172443170711e-05	0.0028306745057832
ENSG00000053254	914.52397707715	-1.15328749191453	0.290235013261204	-3.97363322555643	7.07845359067864e-05	0.00283880638759035
ENSG00000137936	1531.83085582553	1.30691234183396	0.328985763669453	3.9725498369804	7.11073528651192e-05	0.00284443949483123
ENSG00000063660	4823.65782185437	0.770250025595127	0.193917323805408	3.97205371072497	7.12556479088788e-05	0.00284443949483123
ENSG00000124225	4853.44317958427	1.33291710835787	0.336146629416658	3.96528476477954	7.3308376045275e-05	0.00291960789319203
ENSG00000147459	978.784057801464	1.17431748434833	0.29633980590509	3.96273960145751	7.4094584293582e-05	0.00294410467152674
ENSG00000273301	8.89884955651434	-6.86523432845761	1.73470938068394	-3.95757030249694	7.57160066050158e-05	0.00297418697177922
ENSG00000248874	22.909927669555	4.63189038569593	1.17025969546334	3.95800214572205	7.55792789866104e-05	0.00297418697177922
ENSG00000159763	18.6725038576564	5.24472765572668	1.32515396060669	3.95782513703199	7.56352941582897e-05	0.00297418697177922
ENSG00000161955	85.8015850368876	1.21098959442806	0.305851749025432	3.95940058635193	7.5138113557358e-05	0.00297418697177922
ENSG00000178726	3365.14250015429	-1.39248060671441	0.351824162295446	-3.95788793364642	7.56154174041901e-05	0.00297418697177922
ENSG00000182782	916.107167934349	-1.27596819037363	0.322554074638399	-3.95582722619163	7.62702700180252e-05	0.00298913438646953
ENSG00000076067	2104.89880333309	0.883868664971808	0.223495178446793	3.95475495764322	7.66131335969051e-05	0.00299574764439716
ENSG00000144810	126.107051485917	2.8727576960429	0.72829540829996	3.94449513659396	7.99682764553751e-05	0.00311985078552093
ENSG00000134317	3462.40044399029	-1.08408900053808	0.274923127954906	-3.94324409373043	8.0386762640131e-05	0.00312908201634265
ENSG00000175556	15.4371290643105	5.19882742578075	1.32208158082288	3.93230455759389	8.41353772460248e-05	0.00326760533976943
ENSG00000160991	305.939752320891	1.63828183227263	0.416790330062755	3.93070979364122	8.46954530476178e-05	0.00328194880559519
ENSG00000148734	30.9161388977863	-3.02202415878808	0.769230432384124	-3.92863312677546	8.54300537193928e-05	0.00330297544773518
ENSG00000238042	17.7559208138153	3.11487833870736	0.793127037577022	3.92733848567718	8.58910626792965e-05	0.00331335366232578
ENSG00000075223	3634.91761376906	1.48495517641022	0.378535498845174	3.92289542444628	8.74911333956455e-05	0.00336752785251025
ENSG00000121316	1713.65643246149	-1.70251615233353	0.434229996271653	-3.92077048327274	8.82663009234401e-05	0.00338978059684774
ENSG00000149380	62.8598772823955	1.85671207095653	0.473936775278051	3.91763662962687	8.94213640392653e-05	0.00342649124341995
ENSG00000198535	225.579776021186	2.23585738795734	0.572223162399134	3.90731717077506	9.33266108454851e-05	0.00356818742132571
ENSG00000175183	537.485303409752	-1.57586379352547	0.403534373785908	-3.90515380075535	9.41654771568187e-05	0.00359227723832166
ENSG00000102312	660.405557507239	1.85282546493179	0.474858539152559	3.90184720746178	9.5461409979841e-05	0.00363365831571497
ENSG00000158292	1490.57034166844	0.985231228301465	0.252635857483095	3.89980756539039	9.62691731081421e-05	0.00364738207754162
ENSG00000163378	906.439899377905	0.851797501712262	0.218388033219366	3.90038542476661	9.60396695957509e-05	0.00364738207754162
ENSG00000285756	640.493117703978	1.14714983262043	0.294191278016425	3.89933325132903	9.64579392782005e-05	0.00364738207754162
ENSG00000137843	136.195159911048	-1.11327675575536	0.285632033730844	-3.89759069112123	9.71544432855251e-05	0.00366566271212162
ENSG00000156486	20.6128183590239	2.95669130196955	0.758794567706758	3.89656361260639	9.75671895546971e-05	0.00367318051704281
ENSG00000224271	9.51926558303483	-7.07474240382527	1.81697018270189	-3.89370308394654	9.87254778543743e-05	0.00370867215389631
ENSG00000150722	17.7378688533964	3.02872581230067	0.778025531330968	3.89283601930059	9.9079126539628e-05	0.00371384830525991
ENSG00000182378	503.331076055357	-1.36979540202388	0.353273727186901	-3.87743354970515	0.000105564146873866	0.00394832858035842
ENSG00000142871	479.302277505193	1.30065879568525	0.335517488021786	3.8765752669226	0.000105937049151309	0.00395368097754505
ENSG00000062096	125.939620629489	-1.67316318752747	0.43199948308103	-3.87306756849437	0.000107474015707706	0.00399491295188307
ENSG00000129514	1575.44532423426	1.83505674096769	0.473808241929938	3.87299455470224	0.000107506230556342	0.00399491295188307
ENSG00000122592	34.9600158152312	-2.40044579551415	0.61999369786473	-3.87172612202564	0.000108067339383142	0.00400710899587705
ENSG00000011677	28.0887959365955	4.18696784957165	1.08175959205654	3.87051603731267	0.000108605211709164	0.00401839283323906
ENSG00000015532	1007.8320319836	0.815394317271278	0.210943559730199	3.86546201417187	0.000110879105802362	0.00409372320886187
ENSG00000103313	11.8521637223054	-6.46809826481637	1.67382353635738	-3.8642653328274	0.000111424051748797	0.00410503385511358
ENSG00000221866	13.4784842781473	3.1599553079274	0.818007698799878	3.86298969137266	0.000112007736208084	0.00411772030226514
ENSG00000221968	245.46783824405	1.88848264895573	0.488968828690379	3.86217390178779	0.000112382520899451	0.00412268927947772
ENSG00000146555	26.3643336073381	3.00042976681818	0.7769840192912	3.8616363944722	0.000112630105112178	0.00412298076267025
ENSG00000126391	3041.50789165216	-0.897082245271449	0.232504092358926	-3.85835034630954	0.000114154932852831	0.00416992700580247
ENSG00000107331	532.314879079667	1.68697644968246	0.437304875102484	3.85766668914247	0.000114474608190041	0.00417274498709674
ENSG00000176171	1670.06239376281	0.769253208377692	0.199495730903918	3.85598832061314	0.000115262991054728	0.00417494686546653
ENSG00000101004	154.09495902346	1.2911779666573	0.334785179403504	3.8567357400881	0.000114911274092244	0.00417494686546653
ENSG00000198692	260.335245372326	-5.65699346537946	1.46704429707738	-3.85604816204203	0.000115234793823168	0.00417494686546653
ENSG00000136158	277.648355041873	1.12483218902887	0.291859040987754	3.85402550910209	0.000116191481567939	0.00419973621927813
ENSG00000271605	123.21648538016	2.61040153981969	0.677460495059118	3.85321588322562	0.000116576518912994	0.00420481972305674
ENSG00000172602	187.463262066814	1.8347382576531	0.476421124035701	3.85108502769834	0.000117595658300962	0.00423270565077
ENSG00000167363	137.993705769745	1.2606303723206	0.327415451585165	3.8502470369597	0.00011799874712042	0.00423834748268649
ENSG00000158315	870.138488967537	-0.758371483671588	0.197057083375639	-3.84848628976177	0.000118849947359077	0.0042540576125114
ENSG00000067048	858.447276230213	-5.12940054341328	1.33289346095122	-3.84831998481911	0.000118930642930426	0.0042540576125114
ENSG00000168453	1223.93737529053	-1.40194748507353	0.364727163842806	-3.84382525914016	0.00012113127113583	0.00432378323629036
ENSG00000172183	392.180417843974	1.01511247881221	0.264263553494826	3.84128823436896	0.000122390297237011	0.00435967922145502
ENSG00000246082	32.3353383925024	1.7059637476127	0.444229912148292	3.84027212252023	0.000122898005520625	0.00436871939045942
ENSG00000120093	48.6380879935998	6.76710154192448	1.76311833536153	3.83814370607	0.000123967927862117	0.00438861769314345
ENSG00000007306	1415.38877945978	-1.63552712414063	0.426091442416086	-3.83844161447277	0.000123817647178419	0.00438861769314345
ENSG00000102271	10.2856033362771	7.35967608663978	1.91814711430992	3.83686737671709	0.000124613724086622	0.00440242119694113
ENSG00000184481	423.52422463888	-0.794088621308363	0.207009103139733	-3.83600822023921	0.00012505022389038	0.00440878914351226
ENSG00000049192	48.9551442669922	2.33723526244623	0.610302802906542	3.82963219456841	0.000128334928454574	0.00450612743685908
ENSG00000147100	354.200381574261	1.02415880637114	0.267413433690523	3.82987044531353	0.000128210741262305	0.00450612743685908
ENSG00000141753	1757.95640207347	1.77458573113635	0.464936882167246	3.81683148659736	0.000135176425128854	0.00473668104753958
ENSG00000149403	13.1330224207041	-4.24164416718053	1.11178551064095	-3.81516410007467	0.000136092463854869	0.00475908707443705
ENSG00000157500	1132.31286483329	-0.628013513707814	0.164955046464174	-3.80717975696614	0.000140560578901539	0.00488554496969896
ENSG00000161714	2784.62614166411	0.923843005591736	0.242624470925317	3.80770745040021	0.000140261063397357	0.00488554496969896
ENSG00000099994	29.9800222547694	2.64889584340669	0.695751127206437	3.80724621179196	0.000140522826428654	0.00488554496969896
ENSG00000231991	5771.98204781646	0.707574832169168	0.185974485250358	3.80468767646612	0.000141983226429011	0.00492504316675632
ENSG00000184058	139.363233458096	2.96084537416688	0.778529247405474	3.80312670851377	0.000142881227911718	0.00494622037469037
ENSG00000180638	30.7021172242774	-2.58976464430353	0.68267783755074	-3.79353847723385	0.00014851560475872	0.00513094574271843
ENSG00000186007	117.56175453148	1.87611614902225	0.495057833744196	3.78969086264712	0.000150834879773306	0.00520062947194334
ENSG00000109501	537.27559979799	0.791059569894733	0.208789215282978	3.78879516752141	0.000151379660377655	0.00520897411359511
ENSG00000200033	10.1334959499715	5.44247561412302	1.43739067653716	3.7863579491378	0.000152871420210828	0.0052194548245085
ENSG00000018236	513.93561695751	-2.23460380556703	0.590179025212385	-3.78631518590969	0.000152897717614198	0.0052194548245085
ENSG00000101017	262.930573267175	1.21064713521538	0.319733181148595	3.78642945616813	0.000152827456213144	0.0052194548245085
ENSG00000130487	71.8867422534089	1.88161977274959	0.496797292646144	3.78750005405086	0.000152170651932486	0.0052194548245085
ENSG00000237380	29.5633028084196	3.58350313681413	0.946741700269588	3.78509062798619	0.000153652573377142	0.00523483668307669
ENSG00000182667	109.462137083869	2.63419247691968	0.6968447636643	3.78017115758752	0.000156720585984401	0.00532880964794785
ENSG00000050628	6.42915377415076	-6.42396570751513	1.70055480678378	-3.77757052103756	0.000158365670072884	0.00536451541010168
ENSG00000130517	567.879603399983	0.962246020834206	0.254729192905513	3.77752549622819	0.000158394294003584	0.00536451541010168
ENSG00000173432	9217.44020613348	2.06676335142677	0.547200739474552	3.77697470476991	0.000158744846752762	0.00536582532098481
ENSG00000285820	62.1287798455642	-1.82795930969217	0.484305006702077	-3.7743968870771	0.000160395232698948	0.00541098035016745
ENSG00000198208	17.9387504500616	2.84804992456952	0.755145735193056	3.77152355080362	0.000162253840831361	0.00546296933758037
ENSG00000020577	385.130988934764	1.67875171639277	0.445424039868609	3.76888440257506	0.000163978802747789	0.00551026426030413
ENSG00000112761	32.0761535332912	2.32427861277163	0.616783445426373	3.76838683010517	0.000164305945972901	0.00551049473774613
ENSG00000122884	1867.20779204186	1.21472817488898	0.322793159714884	3.76317817875052	0.000167767580403463	0.00561564439852447
ENSG00000064989	149.396568371839	-1.73638228521545	0.461634939055075	-3.76137536030022	0.000168981620485457	0.00564529860281997
ENSG00000111696	126.059059627281	1.80517762921147	0.480124422579989	3.75981213267844	0.000170041002013331	0.0056696810845724
ENSG00000167850	6.90995741426596	6.24461878838653	1.6620893609079	3.75708968197442	0.000171900904086139	0.00572060939033273
ENSG00000181274	373.096192516736	-0.885059463140337	0.235775325410501	-3.75382564566241	0.00017415602405501	0.0057844679418271
ENSG00000225431	19.5880871012979	-2.20703304901327	0.589390214548532	-3.74460415957846	0.000180678409660239	0.00598954149943047
ENSG00000140199	3570.2872847226	0.969801926656535	0.259203603382734	3.74146776510875	0.000182948646210731	0.00604151911335052
ENSG00000230148	11.0939297809431	5.58720402761288	1.49319406305562	3.7417802319542	0.000182721274248856	0.00604151911335052
ENSG00000128595	3565.16133805116	0.859083890886414	0.229707264772328	3.7399073631297	0.00018408808629232	0.00606750100509456
ENSG00000169991	2515.07268312242	-0.797608582851392	0.213350225259122	-3.73849421477135	0.000185125752157039	0.00609003549877982
ENSG00000182489	30.1845059620261	-2.20906501544336	0.591292699343148	-3.73599237382325	0.000186976334607939	0.00613917526131601
ENSG00000149043	1537.88332958263	-3.54042325904731	0.948336373630711	-3.73329902499973	0.000188988001996827	0.006193406808296
ENSG00000143546	79784.1386273795	-1.30318400941773	0.349265950842792	-3.73120828489894	0.000190563585571611	0.00622485444019398
ENSG00000006118	6764.87142032502	0.997216989520674	0.267274010888653	3.73106605541276	0.000190671217087023	0.00622485444019398
ENSG00000184497	27.8518570144056	2.05482723773914	0.551068424783536	3.72880598003104	0.000192389204494565	0.0062690459532746
ENSG00000241859	9.07138008479348	-6.36663024284872	1.70829406933703	-3.72689360522075	0.000193854240294972	0.00630484348634214
ENSG00000140743	25.7366596675711	3.08837976447281	0.829597585694035	3.72274439768179	0.00019706899875622	0.00639730589358634
ENSG00000233101	5.35179492384312	6.51094436166444	1.75127051033125	3.71784046111352	0.000200933092498977	0.00651045924000923
ENSG00000176485	112.275591195997	-1.63252804996697	0.439317486529769	-3.71605524483566	0.000202357355559219	0.00654428252330144
ENSG00000132854	545.091209943964	1.94210287589722	0.522952547675649	3.71372677029536	0.000204229290396752	0.00655981677072183
ENSG00000167552	1505.35243603859	1.55760600188886	0.419321455868741	3.71458693584341	0.000203535889293285	0.00655981677072183
ENSG00000283098	72.1590624544737	2.45271806464356	0.66047595497582	3.71356147966561	0.000204362789253525	0.00655981677072183
ENSG00000272763	24.9039226613962	8.67193839224925	2.33507986291556	3.71376522489537	0.000204198243850056	0.00655981677072183
ENSG00000161544	91.5517947555953	1.97696046289086	0.532663912612244	3.71145935754427	0.000206067758109437	0.00660222677518224
ENSG00000237975	197.574591360628	-1.95124586808776	0.526166894900736	-3.70841625917167	0.000208559609035566	0.0066696432592136
ENSG00000099725	190.560789205337	-3.9666030050017	1.07040656573614	-3.7056975657411	0.000210809729564006	0.00672909350120355
ENSG00000278934	8.09466314211003	5.56989690298647	1.50367329271705	3.70419354387946	0.000212064304858932	0.00675660437981098
ENSG00000002079	56.4890012028916	2.43222176866152	0.657422044664014	3.69963524710301	0.000215909555815121	0.00686640278705944
ENSG00000167034	78.4525118165076	1.85255900728475	0.501046709770686	3.69737785152328	0.000217837979684267	0.00691494915215464
ENSG00000179930	59.8209439140343	2.44179128201629	0.660850673145801	3.69492138124457	0.000219954834881753	0.00696928717152957
ENSG00000155016	85.3291236961825	1.41723114507143	0.383735812706272	3.69324701563947	0.000221408765588948	0.00698961066414285
ENSG00000242247	1413.63792774568	0.905625290273093	0.245191545190008	3.69354208184989	0.00022115189251195	0.00698961066414285
ENSG00000104267	2412.50506799289	-1.94129663810256	0.525710857146736	-3.69270790532809	0.000221878817447928	0.00699162097837288
ENSG00000257335	9.21265626300544	4.10585146758615	1.11203690598578	3.69218993136426	0.000222331322776262	0.00699307204454404
ENSG00000144741	75.6999724653139	-2.10538281379643	0.570375045090753	-3.69122532957494	0.000223176314779872	0.00700684032078048
ENSG00000163221	1038.27167014584	-1.46337633166555	0.397038169616995	-3.6857321125503	0.000228046131001347	0.00712141791963993
ENSG00000079215	187.365815927953	-2.20296326244555	0.59777908255665	-3.6852464844097	0.000228481411894289	0.00712141791963993
ENSG00000161896	23.385284812942	4.88998352797898	1.3268060266453	3.68553008486314	0.000228227118942028	0.00712141791963993
ENSG00000182718	79052.2992298895	0.688682232020146	0.186821071170484	3.68631989799313	0.000227520325045242	0.00712141791963993
ENSG00000115526	17.3916132766745	2.58986556675238	0.70287331835989	3.68468328374688	0.000228987199573979	0.00712427625437668
ENSG00000112039	172.818718677183	-1.30332956419271	0.353762201054437	-3.68419678616866	0.000229424949056224	0.00712501127890312
ENSG00000276980	145.825581918944	4.43325964323949	1.20388568402237	3.68245897602775	0.000230995048800484	0.007160846512815
ENSG00000084234	31706.121588441	0.87862341994742	0.238776488102683	3.6796898510777	0.000233517786965147	0.00722603151930819
ENSG00000158470	5816.61446626839	0.994703529007607	0.270630518408911	3.67550391159009	0.000237380403558198	0.00733236955694578
ENSG00000074211	1659.39147124831	-1.09841192099092	0.298943989992006	-3.67430675231268	0.00023849606957965	0.00735362881203922
ENSG00000150764	600.640902264046	1.24293140735992	0.338348843195132	3.67352048738378	0.000239231486370235	0.00736310862790678
ENSG00000080854	17.6901351600193	-3.4467622291724	0.938476542247289	-3.67272070638946	0.000239981727553654	0.00737301004028683
ENSG00000255398	122.039096612674	-1.62973875929378	0.443939561611476	-3.67108250811872	0.000241525349607738	0.00740720791444051
ENSG00000146281	278.370936686808	-1.08767155808912	0.296611995804242	-3.66698438861172	0.000245427772582566	0.00751349613395559
ENSG00000245648	161.326225326838	1.52778579331562	0.417577526720032	3.65868777785049	0.000253509959872374	0.00773340223334077
ENSG00000081181	54.8509278731218	-2.74683142941728	0.750752054290804	-3.6587731111999	0.000253425576106008	0.00773340223334077
ENSG00000147454	795.245703169519	0.970823890395382	0.265406879536424	3.65787010529299	0.000254319870434252	0.00774437764747135
ENSG00000163331	354.878010205616	-1.46379173261715	0.400478827970178	-3.65510391656998	0.000257077826087988	0.00780074779161171
ENSG00000103855	1917.24721674687	0.982707882490309	0.268842431932705	3.65533028185184	0.000256851085196702	0.00780074779161171
ENSG00000105514	1758.52194629879	-1.0260440837506	0.280911468893504	-3.65255319689202	0.000259645784675746	0.00786479881222926
ENSG00000277586	418.321965276654	2.1327049184737	0.584592758955123	3.64818907830061	0.000264095255746399	0.00798551647647943
ENSG00000183762	1557.73477526918	-0.985009745188142	0.270309995059147	-3.64400045574567	0.000268432943031707	0.00810243646466756
ENSG00000235109	487.207442390754	1.34243988148496	0.36874211119064	3.64059281743093	0.000272011025171633	0.00819605899838519
ENSG00000116525	347.863825352936	-1.00149511300649	0.275404361916279	-3.63645334459495	0.00027641768063922	0.00831427656538074
ENSG00000114200	16.0219624335258	-5.81175116551858	1.59979900253574	-3.63280084329766	0.000280361406307203	0.00841818149304612
ENSG00000154134	172.353646302326	2.79404965745228	0.769369626223343	3.63160899809319	0.000281659648322321	0.00844242900589813
ENSG00000133321	1343.99635315754	-1.32205844464446	0.364947912502834	-3.62259489464596	0.000291662409937335	0.00871189542182614
ENSG00000237659	7.96072780186547	-6.34387361270094	1.7509962960258	-3.62300801383732	0.000291196796864049	0.00871189542182614
ENSG00000173482	996.596185215827	1.21585471422872	0.335793025004759	3.62084565101221	0.000293641664101677	0.00875581426493822
ENSG00000187260	18.6180285520917	2.81702846274198	0.778386019609917	3.61906353887717	0.000295671041705454	0.00879111863967716
ENSG00000134769	14.8583145518496	2.84072387088416	0.784966914798938	3.61890904868492	0.000295847584561062	0.00879111863967716
ENSG00000258661	40.56544377371	3.74388029342798	1.03586611109636	3.61425115980043	0.000301216958611044	0.00893523753948794
ENSG00000204103	975.680292154867	-1.36231330185071	0.376987291296457	-3.61368495252379	0.000301875838830071	0.00893936971957206
ENSG00000189120	670.303523635705	-1.19927349368939	0.331911877493724	-3.61322861581556	0.000302407847612598	0.00893973714463015
ENSG00000120889	4615.58734732601	0.833790313174509	0.23094460155434	3.61034770920298	0.000305786801858541	0.00900244896227588
ENSG00000168615	6592.90609342883	1.13371919263092	0.314042411688854	3.61008306659606	0.000306098962100052	0.00900244896227588
ENSG00000277013	35.4272270314605	-2.79458908916753	0.774030663763352	-3.61043718291493	0.000305681330230955	0.00900244896227588
ENSG00000109193	132.06835437308	-2.23056272841747	0.61804035670604	-3.60908912211763	0.000307274040189645	0.00902158679430518
ENSG00000172661	943.312922292815	-0.717818654505632	0.199109424003843	-3.60514655746168	0.000311976819092579	0.00914405651190431
ENSG00000234465	58.1040565683445	-2.79270471868987	0.774758539841279	-3.60461301822114	0.000312618388611354	0.00914727785043938
ENSG00000150556	177.673094889179	-1.36017848712737	0.377512455457839	-3.60300294059906	0.000314561968615076	0.00918852066217722
ENSG00000159899	64.0372203844717	1.84751172845581	0.513262238168344	3.599547348445	0.000318771588610611	0.00929570369838231
ENSG00000137709	85.1136992320207	-1.95273795552971	0.542741865364841	-3.59791289403672	0.000320781006488712	0.00933847244778052
ENSG00000271303	206.234606089056	-1.0150751932311	0.282394520810651	-3.59452864140985	0.000324979395185381	0.00944471367257514
ENSG00000144366	76.7563961807945	-1.33517942424506	0.371738905562181	-3.59171290458788	0.000328511639288077	0.00953126939958071
ENSG00000198643	1146.40257129127	-1.68838036378598	0.470152836502444	-3.59113086788152	0.000329246250963553	0.00953650125896957
ENSG00000183496	107.648602118018	1.68848145788456	0.47028522389229	3.59033491188589	0.000330253347546313	0.00954959469669632
ENSG00000109814	895.619218458626	0.920197764976591	0.256411900736972	3.58874826921756	0.000332269479925398	0.00957570586619175
ENSG00000119681	1899.5215605816	1.24748518039195	0.34759264840119	3.58892855222908	0.000332039817325333	0.00957570586619175
ENSG00000138735	125.046505831247	1.39120547556927	0.387977741845245	3.58578682620456	0.00033606340334936	0.00966884758298619
ENSG00000178363	404.874550676891	1.24813894376488	0.34829110673909	3.58360842299623	0.000338880001633727	0.00973360672472165
ENSG00000142185	7.27218190796319	-5.79230346297373	1.61788418451797	-3.58017188028787	0.000343368270874624	0.00984608516732984
ENSG00000261222	41.5585018457374	3.44016159181879	0.961329456013338	3.57854590879306	0.000345511182891606	0.00989104808926801
ENSG00000213516	438.452692846043	-0.790658797502022	0.220980131965881	-3.57796327872634	0.000346282086678243	0.00989665000215808
ENSG00000166347	838.913027661568	-0.921060156682582	0.257462273266339	-3.57745678618228	0.000346953556529517	0.00989939625222279
ENSG00000175567	54.327477564183	2.14080056293167	0.598805524926878	3.57511825428312	0.000350069630099369	0.00995528592704075
ENSG00000239713	73.7950252143897	2.44670762853082	0.684336572447038	3.57529865718257	0.000349828316128045	0.00995528592704075
ENSG00000167123	663.028372356895	1.27063549722066	0.355679037953205	3.57242165445755	0.000353695315350294	0.0100108754817775
ENSG00000067057	5450.24238415018	0.782976944313019	0.219164801308126	3.5725487835623	0.000353523599383299	0.0100108754817775
ENSG00000171310	565.460524707524	1.36776741109289	0.382874334939493	3.57236640400315	0.000353769967621083	0.0100108754817775
ENSG00000155846	213.618519726001	-0.998746715563759	0.279866274387272	-3.56865691570153	0.000358815927245851	0.0101369918362313
ENSG00000198455	502.451729018422	1.35910495468878	0.380981427342427	3.56737850495588	0.000360570468161373	0.0101698604995351
ENSG00000163393	519.302138325651	0.724180263992689	0.203091055848776	3.56579102396278	0.000362760355710032	0.010205626552118
ENSG00000123892	1738.61935612528	-1.28721849926761	0.361010363152892	-3.56559985709457	0.000363024902638547	0.010205626552118
ENSG00000182492	156.825882788659	1.83531516541417	0.514822818111846	3.56494526047881	0.000363932135466484	0.0102144410941286
ENSG00000151491	246.116797465488	1.45267478690307	0.408029310405513	3.56022165530058	0.000370541890980948	0.0103830182969499
ENSG00000163121	7.87088451769285	5.41326651246373	1.5218060769101	3.55713293211112	0.000374924456644384	0.0104080639330761
ENSG00000171450	6.00517657468512	6.44095450616186	1.81012189390184	3.55829876864147	0.000373264598021751	0.0104080639330761
ENSG00000250742	16.4419740046626	-2.82724640917971	0.794699211216826	-3.55763082342902	0.000374214742020781	0.0104080639330761
ENSG00000167741	1128.76452486611	-1.28281185200767	0.360634551639518	-3.55709636299612	0.000374976633324335	0.0104080639330761
ENSG00000270806	15.7720535663076	3.05585663561023	0.858703196680789	3.55868785329118	0.00037271216974658	0.0104080639330761
ENSG00000012817	413.997852481892	-5.59489369984099	1.57290973655092	-3.55703418309908	0.000375065366957697	0.0104080639330761
ENSG00000253837	6.90145007835736	6.30405921775856	1.77257203963972	3.55644739778242	0.000375903704313076	0.0104145301653889
ENSG00000111859	352.077366760783	1.54513791830266	0.435064487287223	3.55151469139006	0.000383020608933181	0.0105946456216967
ENSG00000232187	86.3274490459628	1.37783453265948	0.388364464744597	3.54778734343163	0.000388481742855705	0.0107284564780616
ENSG00000162896	769.192599829757	5.19394084845575	1.46599043932789	3.54295683595114	0.000395667458220334	0.0109093888119885
ENSG00000176194	8.72722596997246	-6.15047552057591	1.73621373005308	-3.54246451005076	0.000396406759470101	0.0109122852746929
ENSG00000215559	40.8854213869009	3.74201837177035	1.05696670923623	3.54033702203767	0.000399616366012877	0.0109830664173347
ENSG00000106823	59.8803111533604	-2.81310643578419	0.795518304001718	-3.53619322350389	0.000405937666851289	0.0111390072698189
ENSG00000266010	5.55144538728366	6.09406798500347	1.72406948619075	3.53469975184587	0.000408238744239805	0.0111843114564424
ENSG00000244649	5.96722050502508	6.52048937169388	1.84636375591578	3.53153020405764	0.000413162673950304	0.0113012143168759
ENSG00000087258	47.7107325024884	-2.70766473538798	0.767153324929565	-3.52949618726685	0.000416351703783195	0.011370366767603
ENSG00000170456	119.144586609197	1.23977067324318	0.351334568421871	3.52874662693169	0.000417532686351894	0.0113845481278674
ENSG00000106484	199.321198557384	1.4479032801369	0.410680646095724	3.52561849189117	0.00042249512449268	0.0115016275583806
ENSG00000170558	47.4533333574703	2.84648525458796	0.807670203969487	3.52431628726456	0.000424577118057962	0.011540046313092
ENSG00000231535	31.5902369587677	-7.83479099776846	2.22473348543405	-3.52167621383191	0.000428827558801408	0.0116371895097448
ENSG00000235097	34.158569325616	-4.15609029524595	1.18049286460652	-3.52063991223804	0.000430506806003829	0.0116643615705447
ENSG00000137269	1160.81765547426	-0.583469016985166	0.165805819401755	-3.51898997930461	0.000433193069606091	0.0117002931908521
ENSG00000111077	98.3856119879468	1.23371107019236	0.350569938344837	3.51915819142149	0.000432918487997979	0.0117002931908521
ENSG00000135503	1602.98623516866	-0.651834430052716	0.185349027666335	-3.5167944405198	0.000436791907144401	0.011779004329811
ENSG00000213694	92.889377787714	1.71971267961634	0.48914416511403	3.51575834338214	0.000438499911258382	0.0118065586435062
ENSG00000164675	10.40363354244	3.39251918732312	0.96550830808045	3.51371309695705	0.000441889811851266	0.0118792409576579
ENSG00000169895	2101.51263498645	0.770554727909042	0.219373832273518	3.5125188812324	0.000443880463996968	0.0119141394431636
ENSG00000181458	1176.78326015006	-1.86523218059665	0.53114432241609	-3.51172384204732	0.000445210361826379	0.0119312216124967
ENSG00000229028	5.28364646703069	-6.32883102052225	1.80455496092323	-3.50714229135164	0.000452946875213464	0.0121196749425313
ENSG00000130826	1477.58372482201	-0.580963576984435	0.165800046614531	-3.50400128858298	0.000458323140141209	0.0122444869970955
ENSG00000159348	2473.61684360734	-0.905955409279408	0.258583535747047	-3.50353090602659	0.000459133373182344	0.0122471157916314
ENSG00000182704	2083.15392488351	0.725009715783463	0.207007711505486	3.50233192044274	0.000461204672729825	0.0122833225918214
ENSG00000143845	486.102487811432	-0.843478841070057	0.240899650367221	-3.50137013393037	0.000462872499224558	0.0122846049050407
ENSG00000214063	358.341462446915	1.12028686765386	0.320023868750588	3.50063534956812	0.00046415047304786	0.0122846049050407
ENSG00000110721	224.09264728896	1.10633960631069	0.316074499234114	3.5002494949497	0.000464822888298837	0.0122846049050407
ENSG00000013588	23650.4895666671	1.16318789089294	0.33228244948598	3.5005998441757	0.000464212309110457	0.0122846049050407
ENSG00000109101	75.0885380556914	-1.89532162893158	0.541256863187793	-3.50170456549756	0.000462291926919814	0.0122846049050407
ENSG00000102409	321.239460886812	-1.2376916658705	0.353800811821438	-3.49827254352134	0.000468282332334023	0.012346932472985
ENSG00000158023	428.030519852426	1.97764200118642	0.565350335308087	3.49808229990473	0.000468616501299576	0.012346932472985
ENSG00000087510	948.195856050406	-0.890435658033447	0.254655429057746	-3.49662939183413	0.000471175927445953	0.0123953850637731
ENSG00000154978	1151.51755003174	0.995608328583008	0.285057118716979	3.4926625690464	0.000478230397615499	0.0125617618182819
ENSG00000134369	3595.84234083339	0.881072933508798	0.25277900386881	3.48554634690334	0.000491133135534967	0.0127450159832264
ENSG00000130054	86.7006063813231	-2.11107172085314	0.605556433818374	-3.48616842784024	0.000489992394396626	0.0127450159832264
ENSG00000173273	103.103993220659	-1.08113705563664	0.310112354595927	-3.48627534380353	0.000489796586208291	0.0127450159832264
ENSG00000106991	70.7736549200852	1.91551310923336	0.54938623549838	3.48664197510461	0.00048912568378226	0.0127450159832264
ENSG00000134398	163.827187587404	2.36519678420584	0.678265878205478	3.48712335413888	0.000488246104549556	0.0127450159832264
ENSG00000061656	63.0070083415724	1.99789301425494	0.572867546259784	3.48753045498748	0.000487503398400647	0.0127450159832264
ENSG00000105419	114.195371722285	2.26011145465978	0.648319300749631	3.48610854566028	0.000490102095795394	0.0127450159832264
ENSG00000233070	5.55528747897574	-6.17614598431997	1.77177070954324	-3.48586075560092	0.000490556279301774	0.0127450159832264
ENSG00000118513	30.4450550595901	-1.99706871384387	0.573186707424954	-3.48415043121937	0.000493701916074302	0.0127923817259915
ENSG00000071967	552.420264536131	-1.53570089936871	0.441124588388873	-3.48133144193475	0.000498927694704004	0.0128696416602435
ENSG00000006534	744.314212108634	1.13721628840596	0.326645858530276	3.48149611791436	0.000498621009211339	0.0128696416602435
ENSG00000198807	1697.27569239833	1.11072963204148	0.319046829241324	3.481400002259	0.000498799989529015	0.0128696416602435
ENSG00000150281	65.1101819199373	1.25470952250886	0.360759541880417	3.47796628183093	0.000505233474291455	0.0129933362110381
ENSG00000101333	37.1191745865351	1.92032133115655	0.552100690683194	3.47820852891936	0.000504777071293984	0.0129933362110381
ENSG00000141579	1886.4515099041	-0.921422554317608	0.265189801293047	-3.4745776414659	0.000511658268643051	0.013138926137319
ENSG00000179241	314.042019570388	-0.907398889880359	0.261303615357086	-3.47258452065559	0.000515472673498314	0.0132171495492377
ENSG00000188293	245.80929265461	-3.80296006070112	1.09534940373589	-3.47191503252792	0.000516759865406324	0.0132304367326128
ENSG00000137747	744.800994945025	-1.20273074554033	0.346599667503884	-3.47008626465821	0.000520291232799446	0.0133010559588625
ENSG00000047457	128.950978262038	6.09052838382556	1.75699314937111	3.46644970471602	0.000527380392117908	0.0134622843418229
ENSG00000105131	472.386986035499	-2.28598935284428	0.660159696402512	-3.46278236205815	0.000534620638899013	0.0136268860626037
ENSG00000116717	2705.29217347119	0.772758963381438	0.223245627590813	3.46147412480494	0.000537225760478341	0.0136326979484216
ENSG00000233539	13.0358466420949	3.01159165519266	0.869959541404351	3.46176058984436	0.000536654306985901	0.0136326979484216
ENSG00000006756	1187.76529474094	1.0323595725107	0.298228952160377	3.46163430824627	0.000536906149421904	0.0136326979484216
ENSG00000109323	747.001212256913	1.13907485735931	0.329460578066709	3.45739348860328	0.000545427803829822	0.0137798610350838
ENSG00000170899	615.444302971551	-0.952216118249142	0.275376919353913	-3.45786466230802	0.000544474826188647	0.0137798610350838
ENSG00000221869	2486.3266689588	-0.640912448367091	0.185357311146643	-3.45771334511883	0.000544780705239152	0.0137798610350838
ENSG00000156475	42.6058949352173	2.24294586836391	0.648877931590015	3.45665303005109	0.000546928566835402	0.0137975161178931
ENSG00000172794	33.3750154865096	2.48342294586285	0.719076174966532	3.45362985497112	0.000553095949398003	0.0139326732201942
ENSG00000125740	109.8047297302	2.06997292887997	0.599461437980873	3.45305435467564	0.000554277305116835	0.0139420190563379
ENSG00000205542	24654.906518263	0.5346568207183	0.154944849694729	3.45062660534814	0.000559286773922565	0.0140293091830806
ENSG00000116032	413.31613660368	1.76476599536165	0.511440043068684	3.45058236889881	0.00055937844228964	0.0140293091830806
ENSG00000233818	22.4592192097431	2.2942392353125	0.665284190365256	3.44851007815609	0.000563688433810776	0.0141168260607196
ENSG00000131002	385.419366084025	-4.85719132596073	1.40952542329607	-3.44597638728825	0.000569000075545678	0.0142291370636096
ENSG00000268895	15.1799610588576	2.90089996683636	0.842367581126861	3.44374597483409	0.000573714460324456	0.0143262079678988
ENSG00000020181	51.2458728841598	1.64041170271535	0.476571419707555	3.44211095101335	0.000577193458279649	0.0143713653396547
ENSG00000168952	13.5964493919534	-4.3238168458651	1.25601359748162	-3.44249206739052	0.000576380768930414	0.0143713653396547
ENSG00000142621	8.22638737366332	4.41588835025731	1.28496262908425	3.43658893286599	0.000589088921355725	0.014646350999892
ENSG00000140511	107.639503948933	1.27589053138159	0.371445270003035	3.4349354653814	0.000592694956249463	0.0147147427449813
ENSG00000205336	3241.39932509509	-0.536761114814804	0.156364229651661	-3.43276154661824	0.000597467310280694	0.0148118516907483
ENSG00000229563	8.56894986180312	4.73841430502749	1.38183989881332	3.42906172350116	0.000605671769045545	0.0149506209274442
ENSG00000184995	17.3498403892071	2.78064611604027	0.810840935690219	3.42933612950026	0.000605059684707942	0.0149506209274442
ENSG00000164976	880.124018491037	0.90797767628687	0.264751428899815	3.42954778397233	0.000604587965940924	0.0149506209274442
ENSG00000131435	591.493585199127	0.933648499949666	0.272306908726154	3.42866254961085	0.000606563186961751	0.0149511742574168
ENSG00000258766	5.29784349419772	-6.05702985103958	1.76880133718187	-3.42436978292311	0.000616227085047177	0.0151676494967621
ENSG00000205403	41.8527069947828	2.23066653280983	0.651510367730387	3.42383888775343	0.000617432143536767	0.0151756000422144
ENSG00000122861	6917.4108262874	1.40152508002348	0.40943598224938	3.42306280049866	0.000619197700200518	0.0151972844963622
ENSG00000168243	80.5365497809721	-2.3344516788183	0.682346296290575	-3.42121250090904	0.000623425999986469	0.0152792654270188
ENSG00000171509	68.6421929353431	7.84074104099035	2.29336362447318	3.41888262171746	0.000628788445384561	0.0153691959639074
ENSG00000176907	42.0757104339976	3.30305071731026	0.96613138687547	3.41884215975276	0.000628881950513852	0.0153691959639074
ENSG00000286156	207.59605235942	1.68501726751792	0.493217365841475	3.4163786277945	0.000634599454252775	0.0154869271069773
ENSG00000132031	25.1601825600815	1.76974158594241	0.518229318102745	3.41497774078374	0.000637872240496333	0.0155061845872999
ENSG00000127948	2111.7388346355	-0.652027038156251	0.19093681721252	-3.41488376979973	0.000638092338727599	0.0155061845872999
ENSG00000108479	319.734107036519	-0.989006198033554	0.289565375687841	-3.41548500294362	0.000636685353333186	0.0155061845872999
ENSG00000179111	14.3547376522067	2.87689566762048	0.842588412379766	3.41435465448085	0.000639332948476756	0.0155144194337695
ENSG00000273906	36.2069793304308	-7.34341788630529	2.15187076179588	-3.41257384815096	0.00064352488369135	0.01559414876607
ENSG00000171224	55.6566672981119	1.36007680087125	0.39864986947874	3.41170762867587	0.000645573152765916	0.0156217807219938
ENSG00000196597	73.9183592264759	-0.976850542918061	0.28644031947551	-3.41031089724635	0.000648888649671725	0.015679956766295
ENSG00000166670	4652.51471129883	2.06223117660254	0.604774290178744	3.40991872520414	0.00064982241309154	0.0156804973593828
ENSG00000142677	198.100829878018	-2.23251995452223	0.656241396898297	-3.40197976700976	0.000668995904853439	0.0161205525812373
ENSG00000162980	1022.98064370834	-0.610356568230755	0.179638676457343	-3.39769018714459	0.00067957332845243	0.0163296915028269
ENSG00000152377	304.702720599792	1.59149581228808	0.468352879338019	3.39806987956931	0.000678630832951769	0.0163296915028269
ENSG00000160094	366.554050522565	-0.800739217577533	0.235895659350535	-3.39446355130959	0.00068763192569622	0.0164773081916483
ENSG00000112541	6.29367521046285	6.25018902216373	1.84120748568769	3.39461417072683	0.000687253782429473	0.0164773081916483
ENSG00000116260	6791.17515142914	0.917384232845939	0.270793922806111	3.38775783200566	0.000704664514997088	0.016861965202399
ENSG00000204323	342.382638155811	-1.489134677582	0.439645403786016	-3.38712668154445	0.000706287668043703	0.016877332400961
ENSG00000056998	30.742862310968	2.44100880042155	0.720809767781562	3.38648130134841	0.000707951008303322	0.0168838798911355
ENSG00000136877	951.991234492187	0.630814460896293	0.186286526986215	3.38625917344508	0.000708524340680023	0.0168838798911355
ENSG00000197043	72.448401390062	2.19838590068488	0.649315470955841	3.38569770630706	0.000709975462656753	0.0168884053401671
ENSG00000141485	380.586020292194	2.29274860254193	0.67724070145503	3.38542647778853	0.00071067744645632	0.0168884053401671
ENSG00000158467	808.506986909879	0.883051697374273	0.261113548328852	3.38186855115667	0.000719945859340621	0.0170850600137316
ENSG00000246090	141.677862399032	1.43090787510594	0.423287358490429	3.38046446794203	0.000723634307712415	0.0171211791065968
ENSG00000203880	370.357241805932	-0.805627654314321	0.238340544645847	-3.38015361805694	0.000724453262981837	0.0171211791065968
ENSG00000090661	984.298495185807	-1.17719127625401	0.348251568861006	-3.38028994414624	0.000724093996637024	0.0171211791065968
ENSG00000137509	1067.61266023272	-1.04539319833847	0.309592260348799	-3.37667743102069	0.000733670353771466	0.0173152241929192
ENSG00000140297	5536.44409606796	1.21348316585882	0.359878687316146	3.37192284130124	0.000746453574275359	0.0175927859526131
ENSG00000164292	465.711829987059	2.00114447609385	0.594672193164747	3.36512199341976	0.000765098229483889	0.0180075445119977
ENSG00000105643	444.64670975402	1.23020378472854	0.365627631861725	3.36463570454049	0.000766447827475365	0.0180146651252919
ENSG00000118971	2967.88117542219	1.12017573719665	0.333223056316595	3.36163934626532	0.000774812510319407	0.0181864246112488
ENSG00000117152	18.7369153479813	2.41889514808526	0.719846625070003	3.36029240652483	0.000778600191680662	0.0182256004052596
ENSG00000155368	1878.06712502312	-1.3269701878665	0.394893818557559	-3.36032149784863	0.000778518203713163	0.0182256004052596
ENSG00000119862	1865.10624992862	-0.969234397610233	0.288563146257257	-3.35882946308796	0.000782733550976523	0.0182974602507487
ENSG00000171105	1437.30581145296	0.911177735753903	0.271339178975066	3.3580765564181	0.000784868722231353	0.0183224781085352
ENSG00000277149	89.7293044749938	2.7149855229618	0.809001316458031	3.35597169958703	0.000790866612438191	0.0184125305372112
ENSG00000167996	24542.6411768391	1.01889499987923	0.303580248208783	3.35626249036629	0.000790035465149489	0.0184125305372112
ENSG00000134775	393.997597410902	1.55379003990505	0.463109182922292	3.35512681933965	0.000793286082260319	0.0184439014125524
ENSG00000189129	77.6648491647681	1.40824090496498	0.419943380541946	3.35340660245106	0.00079823348622416	0.0185338827671885
ENSG00000001561	162.235117404249	1.92927806672201	0.575908899133193	3.34997092357105	0.000808200437224806	0.0187400114857854
ENSG00000135074	1488.08408098478	3.15901278242133	0.943289714088291	3.34893165401955	0.000811238045731136	0.0187848970629721
ENSG00000173338	34.1672333425512	-2.67353224200055	0.798534435471211	-3.3480487794154	0.000813826856978933	0.0187848970629721
ENSG00000176834	443.585648707359	-1.22297900503575	0.365336313349953	-3.3475429634181	0.000815313488920327	0.0187848970629721
ENSG00000128833	416.869850245923	1.06976713689175	0.319577005062779	3.34744715653617	0.000815595356352233	0.0187848970629721
ENSG00000101276	212.867673634803	1.06847085522824	0.319167093371603	3.34768488800387	0.00081489610758902	0.0187848970629721
ENSG00000163359	1508.31055619444	1.47234638313842	0.440223932435973	3.34453961871454	0.000824192570859369	0.0189272153938975
ENSG00000165507	374.077931820608	2.0784471804121	0.621448765477066	3.34451896258341	0.000824253948034212	0.0189272153938975
ENSG00000286009	7.68609168266534	-6.01422814182434	1.79838259476328	-3.3442428542943	0.000825074777414888	0.0189272153938975
ENSG00000271447	18.9254663657066	2.55442016468616	0.764035406743124	3.3433269481253	0.000827803065109337	0.0189645162918857
ENSG00000197057	11.3907642227369	4.78488367242518	1.43319003188738	3.33862472244795	0.000841942242285682	0.0192627876044218
ENSG00000177551	192.134869869236	2.31053022075371	0.692298425464663	3.33747721468947	0.000845426533956002	0.0193168174192736
ENSG00000108551	22.6786071939467	2.22161318487692	0.665761628639108	3.33694987711766	0.000847032222295377	0.0193278373800954
ENSG00000163453	936.567189323132	1.58459915999731	0.474969794820226	3.33621038069816	0.000849288676940151	0.0193536578632521
ENSG00000099204	8633.09769203031	-1.26343873065426	0.378782198636022	-3.33552826717792	0.000851374978409556	0.0193755377030905
ENSG00000170412	719.303898063312	1.40846400514571	0.422338810672505	3.33491492979998	0.000853254979594072	0.019392670969506
ENSG00000167769	12.3842828130779	-6.38035480662102	1.91349701031277	-3.33439497016937	0.000854851773992787	0.019403330833174
ENSG00000162836	360.89649531183	0.966441255686177	0.289902330222431	3.33367881156617	0.000857055632131808	0.0194166171718312
ENSG00000124406	43.4924877165531	2.1243966115273	0.637292545253722	3.3334716173112	0.000857694219737968	0.0194166171718312
ENSG00000271254	148.575481353077	0.883276068811614	0.265129793875508	3.33148551847159	0.000863837944623402	0.0195300024142518
ENSG00000151150	889.3609598471	-0.606172260629909	0.182020633848478	-3.33023925811902	0.000867713890785913	0.0195918864710914
ENSG00000169562	39.1546706102595	2.80409510880506	0.8427015436935	3.3275067902628	0.000876268535993502	0.0197591089931431
ENSG00000103067	2767.30665283789	-0.962651455566561	0.289335067143292	-3.32711642965078	0.000877497016929218	0.0197609112254806
ENSG00000267278	74.3812842810776	1.34187491555837	0.403426937578077	3.32619066940386	0.000880416808915169	0.019800746663249
ENSG00000011422	1145.14198173024	1.25147308351541	0.37636596599998	3.32514944647114	0.000883711523794237	0.0198488991734724
ENSG00000163171	1375.06620170181	1.00571280780855	0.302869371769035	3.32061575567798	0.000898191032950672	0.0201478184118857
ENSG00000119408	583.809406047284	0.963278094886914	0.290153729718253	3.31988872182441	0.000900533358935385	0.0201478237197442
ENSG00000125845	508.194861672429	0.979700405403178	0.295097002862205	3.31992665428949	0.000900411009920013	0.0201478237197442
ENSG00000123700	44.9467195074343	-2.00231088244248	0.603346953467251	-3.31867240057451	0.000904464712386936	0.0202095004891133
ENSG00000139725	43.5081718251236	1.89351240721417	0.570676607786132	3.31801300663052	0.000906602626897142	0.0202309963628604
ENSG00000139433	11183.0041754159	-1.18284220228642	0.356555394236573	-3.31741496947206	0.0009085456569415	0.0202480933001017
ENSG00000057019	1941.45431827881	1.42490039929795	0.42972367724173	3.31585266244571	0.000913639836376068	0.0203090095411502
ENSG00000130822	29.5660077348894	2.63648225971648	0.795071381265084	3.3160321473544	0.00091305325110122	0.0203090095411502
ENSG00000179348	21.2329304778241	3.02143448321151	0.911349082134989	3.31534265238221	0.000915308537077655	0.020319849523124
ENSG00000126458	1595.83175251611	0.736945593198696	0.222383069823264	3.3138565529488	0.000920187020706731	0.0204018269217259
ENSG00000269113	29.5031432958481	2.46830397491086	0.744926133458567	3.31348822929723	0.000921399853027832	0.0204024253170449
ENSG00000183770	10.332044526245	3.87953038307572	1.17123425819201	3.31234367159342	0.000925178162579223	0.0204597561531819
ENSG00000143153	7102.64424014947	0.916108865518898	0.276656363791999	3.31136017607629	0.000928436250663593	0.0205054501831414
ENSG00000162772	577.786906488408	1.38111314729455	0.41719047253311	3.31050979881842	0.000931261915806708	0.0205414887967364
ENSG00000104131	2259.25569999322	-0.484266625274723	0.146347989152486	-3.30900771564512	0.000936272568944754	0.0206255692044744
ENSG00000182022	1334.64613656098	1.16010613298726	0.350717705299254	3.30780600881665	0.000940299197524005	0.0206877847741695
ENSG00000148735	10.7570628509707	4.32731096478071	1.30840492223314	3.30731785798773	0.000941939450048207	0.0206974051571895
ENSG00000280587	27.8785038235761	1.89361767847235	0.572662206791558	3.30669224547169	0.000944045467707288	0.0207172222855917
ENSG00000105146	40.082924827135	-1.95859356729992	0.592398993676449	-3.30620677652543	0.000945682720783183	0.0207267149185664
ENSG00000162645	1394.36772920722	-1.25329015936952	0.379135401831279	-3.30565321337956	0.000947552832253108	0.0207412805075251
ENSG00000203797	12.929888707889	3.25573614115459	0.985079901060212	3.30504778104857	0.000949602096129017	0.0207597256212195
ENSG00000130598	386.918121826523	-3.97270378339628	1.20241334919916	-3.30394184831879	0.000953356053265436	0.0208153437771977
ENSG00000101347	1336.65659693033	-0.842349597320744	0.255019612011539	-3.30307771499013	0.000956298812303268	0.0208531318956625
ENSG00000177000	833.211119570217	-0.650154487808906	0.197044640413031	-3.29952891104319	0.000968472513297039	0.0210272007606269
ENSG00000196189	630.124050221565	-0.94789330095386	0.28729813756892	-3.29933674118047	0.000969135805178699	0.0210272007606269
ENSG00000026297	235.088207206792	1.06890339951011	0.323976209111436	3.29932683156512	0.000969170020527588	0.0210272007606269
ENSG00000153048	1323.60542708568	-0.8917718313252	0.270220219887147	-3.30016692199286	0.000966273373847162	0.0210272007606269
ENSG00000183876	332.748130852201	1.23149974895007	0.373528012310671	3.29694081397516	0.000977440964186398	0.0211741258291767
ENSG00000111799	3049.13600730376	1.10411283635584	0.334918179444834	3.29666439184052	0.000978403373100581	0.0211741258291767
ENSG00000127329	19.4584050791789	2.68414641671714	0.815456402285536	3.29158788770816	0.000996234824913879	0.0215329399028182
ENSG00000113212	16.7186928100093	2.35378282924539	0.715590356019504	3.28928808143585	0.00100441161707044	0.0216651442480338
ENSG00000177076	196.358355945909	1.05220855007388	0.319901932013721	3.28915972295143	0.00100486981167864	0.0216651442480338
ENSG00000134508	201.336024707514	-1.43088916821511	0.435174686844247	-3.28807996299482	0.00100873184156045	0.0217211906558793
ENSG00000137573	187.222075634107	1.20025402158687	0.365170774507957	3.2868293559476	0.00101322211934682	0.0217906082042025
ENSG00000144746	4536.12955896315	0.889814262902671	0.270827752646	3.28553574812456	0.0010178862515947	0.0218363253848962
ENSG00000234409	7.3080850236823	4.70787215326669	1.43282815694677	3.28572001495192	0.00101722066183249	0.0218363253848962
ENSG00000145824	2401.67754903225	-2.98630368658255	0.909154036798398	-3.28470596368782	0.00102088851166445	0.0218503586403144
ENSG00000261068	800.621101027838	0.713949454341331	0.217359171105263	3.28465300410802	0.00102108040376709	0.0218503586403144
ENSG00000107796	61.8063976402423	1.48914572587945	0.453740358175772	3.28193359714892	0.00103097880564555	0.0220347706225238
ENSG00000143543	240.199320896465	-0.668686632111961	0.203899859779557	-3.27948549270658	0.00103996556969199	0.0221391897336008
ENSG00000163344	715.28451621173	-0.890412102788242	0.271494594273246	-3.27966788868026	0.00103929351998395	0.0221391897336008
ENSG00000189143	12674.4048055958	0.9086836507128	0.277082817727671	3.27946589458281	0.00104003780416154	0.0221391897336008
ENSG00000182742	51.5361023772837	6.25430513077552	1.90726447542879	3.27920181566294	0.00104101159514577	0.0221391897336008
ENSG00000266173	72.7686418093241	1.07104090386084	0.326847655325704	3.27688109860707	0.00104960559638606	0.0222944003528669
ENSG00000229417	45.6869471383115	-1.81363679132452	0.553588517289076	-3.2761459724741	0.00105234155120546	0.0223249523902465
ENSG00000020633	32.1703963862204	2.98039352114215	0.910308366363349	3.27404825800813	0.00106018503859088	0.022408456497489
ENSG00000198113	1730.41241016014	0.613670469750544	0.187421682385747	3.27427681759628	0.00105932782189426	0.022408456497489
ENSG00000105143	10.4941906336589	-3.89198792209083	1.18849809021798	-3.27471112837634	0.00105770069845415	0.022408456497489
ENSG00000163513	4885.50219132602	0.745848588450482	0.227917171935059	3.27245455933877	0.00106618009431853	0.0225075196598163
ENSG00000149328	64.5962202892393	1.51565591907948	0.463599294147513	3.26932318105991	0.00107805092444003	0.022730228131116
ENSG00000250397	24.0620663716741	2.12500643097237	0.650204842954407	3.2682107092847	0.0010822975730902	0.0227918356732154
ENSG00000090447	164.473139797363	-1.12078983752082	0.343102550772553	-3.26663219202881	0.00108834981897383	0.0228912697254826
ENSG00000161642	2586.33427226652	-0.556242439799424	0.170358234126841	-3.26513386717353	0.00109412353887617	0.0229760542434866
ENSG00000111725	1081.4603478676	0.597142377633911	0.182897954802448	3.26489368499991	0.00109505169890491	0.0229760542434866
ENSG00000183878	292.090119438206	-6.40054144101761	1.96182290747211	-3.26254801931382	0.00110415464834188	0.0231388315770062
ENSG00000173535	60.9802385536539	2.24804636729867	0.689349639477891	3.26111197940326	0.00110976204492909	0.0232265335703054
ENSG00000130702	7806.01684365232	0.975144068354822	0.29905186966289	3.26078572741934	0.00111103964710034	0.0232265335703054
ENSG00000181449	312.396754714501	1.17705505091913	0.361036079585031	3.26021447017709	0.00111327996539413	0.0232451235492792
ENSG00000112078	2004.36481759844	-0.589298167471556	0.18077406245175	-3.25986017838618	0.00111467150096076	0.0232459674836725
ENSG00000103260	675.086736161169	1.03707299021717	0.318207987497927	3.25910420530826	0.00111764608009459	0.0232797830605659
ENSG00000244617	47.8691363460305	-3.21414601946063	0.986364754028966	-3.25857752553701	0.00111972277903394	0.0232948372591039
ENSG00000186350	4641.79858018058	-0.523348112185388	0.160716738002919	-3.25633856615409	0.00112859087993967	0.0234509735378768
ENSG00000102181	364.593614802148	0.975022875442377	0.299551520442248	3.25494216822163	0.0011341545814256	0.0235381538883322
ENSG00000196968	536.533830774033	0.759553283266329	0.233408652531463	3.25417791940658	0.00113721032131114	0.0235731368411544
ENSG00000081842	15.3463519339536	4.88165933398232	1.50041958730635	3.25352946287925	0.00113980904870015	0.023598573625615
ENSG00000265190	6352.17492037473	0.615276226367119	0.189349846072057	3.24941498042187	0.00115642640867565	0.023913841780366
ENSG00000203805	7.66035404596819	4.45340445291394	1.37074025356074	3.24890470046783	0.00115850283524606	0.0239178016713239
ENSG00000197256	324.775389924031	1.13022882721914	0.347903491935367	3.24868491814135	0.00115939823271631	0.0239178016713239
ENSG00000154556	1253.94153888715	1.11973371435658	0.344837510983533	3.24713431309405	0.001165733624494	0.0240196970172686
ENSG00000134107	12187.3849030068	0.592839590479773	0.182624047926882	3.24622960234203	0.00116944481377823	0.0240673421304479
ENSG00000188157	11535.706839866	0.789061248945927	0.243139308806003	3.24530514140561	0.00117324829541297	0.0241167705168222
ENSG00000026652	354.223455815727	1.43588953770056	0.442859860247522	3.24231131920157	0.00118564427837135	0.0243424938059416
ENSG00000111405	212.421224155777	-4.89075122841537	1.50863535154471	-3.2418378791188	0.00118761561192867	0.0243539053673811
ENSG00000154620	7.24182786672722	-5.58291986829618	1.72316357212972	-3.23992449619628	0.00119561354209318	0.0244887273710871
ENSG00000105141	2044.49255091445	-4.67224714228551	1.44282144941032	-3.23827119717069	0.00120256436654275	0.0246018072846231
ENSG00000233276	4938.21601996961	0.741253112017647	0.22898785349399	3.23708485278719	0.00120757499635419	0.0246109916100703
ENSG00000091137	11.6307876183619	3.20515908572369	0.990221320440002	3.2368108215439	0.00120873512993371	0.0246109916100703
ENSG00000264268	20.0977779181622	2.8297952719257	0.874241447645888	3.23685782634262	0.00120853605816555	0.0246109916100703
ENSG00000237438	12.9074703499003	5.32285038590886	1.64405405752025	3.23763708471811	0.00120524020187551	0.0246109916100703
ENSG00000102144	13144.1146459449	0.736352479873163	0.227996669676479	3.22966331445993	0.001239360743919	0.025204730022608
ENSG00000165246	199.309425065037	-5.30850496786244	1.64387675929983	-3.2292596983508	0.00124111135007351	0.0252105322054483
ENSG00000089248	1617.71976100584	-0.604032347188325	0.187208619563583	-3.22651995723505	0.00125305493054186	0.0253971792836446
ENSG00000167637	195.890280794821	-0.719383692551031	0.222962743020026	-3.22647489354944	0.00125325226456346	0.0253971792836446
ENSG00000170854	740.268623323076	-0.812934991011159	0.252077541977973	-3.22494016972838	0.001259989978934	0.0254885178978623
ENSG00000197182	279.721644466713	1.837163812235	0.569703156822736	3.22477379707874	0.00126072239064695	0.0254885178978623
ENSG00000148346	42815.7579018209	0.8858153886616	0.274769102973127	3.2238536978018	0.00126477998787134	0.0255405395438104
ENSG00000137968	647.737014422403	-3.05612446394868	0.948334344144254	-3.22262341632942	0.00127022431462107	0.0255990693717504
ENSG00000148516	63.9200034378214	1.57924776837538	0.490065101472256	3.22252648399364	0.00127065418445073	0.0255990693717504
ENSG00000008517	512.158412407724	3.12199610684998	0.969162697124777	3.22133333867681	0.00127595648742486	0.0256758261592336
ENSG00000171298	1921.97824786131	0.898594250448138	0.279350348153837	3.21672858611684	0.00129661197372692	0.0260609918317425
ENSG00000171798	15.8919090407162	-3.72274708935338	1.15747860713402	-3.21625563220653	0.00129875088282721	0.026073522682663
ENSG00000171346	34930.4679861605	-1.3806204250492	0.429617169249547	-3.21360626126945	0.00131079285695047	0.0262846050161222
ENSG00000140379	57.4543737624682	2.69888306507289	0.840386989786423	3.21147649579724	0.00132054772551352	0.0264493872147382
ENSG00000204136	10.0173980331643	-4.43422980490219	1.38099941858904	-3.21088462834592	0.00132327049945528	0.0264731034222419
ENSG00000130508	2151.08693994125	1.80993593441682	0.563867373332109	3.20986107729769	0.00132799138032221	0.0264815739117112
ENSG00000124882	1831.38790842153	1.66400895308774	0.518328661204925	3.21033559907632	0.00132580083486663	0.0264815739117112
ENSG00000273084	24.6067353011359	-1.839819204593	0.573189576065254	-3.20979180609444	0.00132831143771036	0.0264815739117112
ENSG00000149021	8.71650082360369	5.8024200483831	1.80843070744401	3.20853877591145	0.00133411318057535	0.0265664551756931
ENSG00000134874	85.2757543648925	1.6182776782403	0.50465279204056	3.20671500042	0.00134259935995693	0.0267045340902416
ENSG00000181885	7238.88570902906	0.745714062268397	0.232645812372435	3.2053620680462	0.00134892681088481	0.0267994062139414
ENSG00000164692	1400.48333625233	1.36096857252038	0.425044809208524	3.20194140249505	0.00136504762694515	0.0270884018703475
ENSG00000132164	1055.48055635855	1.44210612488562	0.450447638881453	3.20149557996716	0.00136716172660414	0.0270899246792353
ENSG00000185909	1424.47784184581	-1.01441718609458	0.316913265950956	-3.20093001803076	0.00136984797854895	0.0270899246792353
ENSG00000198832	180.82955213642	2.2006916001703	0.687474760647854	3.20112348284094	0.00136892853058691	0.0270899246792353
ENSG00000274642	11.1084979601398	2.95724967262439	0.924302053636964	3.19944076829445	0.00137694477845852	0.0271990067891835
ENSG00000143641	4504.16607834422	0.755142426717537	0.236213139230108	3.19686884979718	0.00138928077449918	0.0274112106941036
ENSG00000183347	4419.06459355163	1.14613077109814	0.359060655564052	3.19202550693746	0.00141278856063147	0.0278431010145069
ENSG00000187193	1226.4791924814	-1.10846702335421	0.347553476175009	-3.18934235834272	0.00142596889179416	0.0280707034134079
ENSG00000143869	87.155487117232	-2.26153724919055	0.709541676052887	-3.18732123216676	0.00143597194670025	0.0282030791586505
ENSG00000111961	2990.27867039488	-0.896563752979178	0.28128019003296	-3.18744008553933	0.0014353819265026	0.0282030791586505
ENSG00000213539	6.39280439750252	-5.42234348226437	1.70186301863445	-3.18612216311931	0.00144193696633735	0.0282879424239841
ENSG00000164877	1120.27740945356	1.40338314899056	0.440745708559018	3.18411075079733	0.00145199447180851	0.0284528073889128
ENSG00000114942	96.0752945045996	-1.00325211588558	0.315116224221458	-3.18375265622793	0.00145379178928362	0.0284556174455343
ENSG00000081853	43.7928052517356	1.72741481771101	0.542770664716732	3.18258691930695	0.00145965696787385	0.0284885890606613
ENSG00000148965	23.1403703991867	2.52185133728065	0.792281405141108	3.18302476988148	0.00145745145540025	0.0284885890606613
ENSG00000269927	9.15929590563773	3.2607071231991	1.02459637482316	3.18243086089573	0.00146044379840182	0.0284885890606613
ENSG00000143858	26.9874329432851	1.97461821019039	0.62058646411524	3.18185832977452	0.00146333379045782	0.0285126363135071
ENSG00000231863	7.276088623215	4.9377888530382	1.55216330503781	3.18123024620656	0.00146651025880404	0.0285286904858553
ENSG00000140931	687.754780335229	0.940065280935592	0.295521371533693	3.18103992295669	0.00146747405289055	0.0285286904858553
ENSG00000154096	78.1852893761377	1.53047229158915	0.48117991109784	3.18066539415015	0.00146937236590174	0.0285333538999316
ENSG00000182327	33.1591890686433	-2.11978733608597	0.666686505130943	-3.17958638696252	0.00147485401165694	0.0286075121426806
ENSG00000168824	722.653700120239	-0.78814373032466	0.24790418347155	-3.17922722919723	0.00147668280545039	0.0286107293556014
ENSG00000198734	7.99713287200439	-5.10208514609722	1.60526537715869	-3.17834372976253	0.00148119038819542	0.0286657824847045
ENSG00000119411	520.7721790451	-1.01285945846693	0.318932763548814	-3.17577738704762	0.00149435577723043	0.0288880799407297
ENSG00000134709	1448.76803236084	-0.739465973891515	0.232959699449278	-3.17422273311491	0.00150238353389477	0.0290046749025593
ENSG00000073067	24.063746830616	-3.09345424797358	0.974636418582353	-3.17395716904682	0.00150375879180953	0.0290046749025593
ENSG00000169435	801.081273652766	1.20313436942472	0.379238416335233	3.17250130155904	0.00151131881888729	0.0290527824345875
ENSG00000092964	128.781768388845	1.04565314646241	0.329587369005504	3.17261292390409	0.00151073794953262	0.0290527824345875
ENSG00000092068	848.195238941121	-1.16493142628784	0.367135518133196	-3.17302840164106	0.00150857765997956	0.0290527824345875
ENSG00000073849	377.490075687618	0.981084310343589	0.309602809525517	3.16884821506352	0.00153044297347679	0.0293875796413707
ENSG00000019582	436.338038244088	2.10127845479879	0.66359927737321	3.16648695447121	0.00154292266552505	0.0295283475643587
ENSG00000153531	68.8831405428489	1.76551790699792	0.557498212412307	3.1668584180001	0.00154095322119863	0.0295283475643587
ENSG00000165804	1294.95937683267	-0.929135954935726	0.293415314939141	-3.16662392052863	0.00154219622224791	0.0295283475643587
ENSG00000175728	17.2953248279806	2.99585393533175	0.946595182083567	3.16487342428421	0.00155150429504	0.0296595904401813
ENSG00000136451	1087.67226447903	0.937895390746269	0.296427094833592	3.16400021149478	0.00155616682410021	0.0297157050040445
ENSG00000113083	123.825058205448	1.88006645925798	0.59433437061018	3.1633143769353	0.00155983788802565	0.0297527836623961
ENSG00000246203	35.7557769330411	1.48670458255288	0.470312209736726	3.16110139557108	0.00157173775289785	0.02992073738151
ENSG00000274528	7.70544485160833	-4.75662787720626	1.50477135030158	-3.16103032946032	0.00157212127828451	0.02992073738151
ENSG00000126467	8.55228763224905	-6.41896395784753	2.03151512106944	-3.15969292636543	0.00157935498457416	0.0300251961432026
ENSG00000169508	59.0488081240442	3.54710801886937	1.12386893412738	3.15615808139006	0.00159862193659821	0.0303579364450025
ENSG00000069493	71.3923990331635	1.11996973314112	0.354904307478707	3.15569495647306	0.00160116220424397	0.0303726523969322
ENSG00000164010	227.886472248274	0.649805659036565	0.206013864588112	3.15418411443199	0.00160947511800271	0.0304461554222037
ENSG00000114405	198.33830983865	-0.928833250268178	0.294469969332988	-3.15425458280891	0.00160908650727855	0.0304461554222037
ENSG00000198742	2310.01121557615	0.618522463766935	0.196110238650621	3.1539529400546	0.00161075057792412	0.0304461554222037
ENSG00000102390	612.771283517184	-0.563904408962236	0.178811803510672	-3.15361960391267	0.00161259133359894	0.0304461554222037
ENSG00000152910	6.82735171224236	5.82836872074176	1.84828929970454	3.15338552339909	0.00161388513484742	0.0304461554222037
ENSG00000112293	26.4534301583301	-2.80234804560796	0.888775209911901	-3.15304479057842	0.00161577012845664	0.030448329748189
ENSG00000142798	7245.83935337911	1.07164221410223	0.341040669855371	3.14227102168399	0.00167642780715081	0.0315568275952185
ENSG00000137124	277.962779653228	1.28223986285987	0.408466102284668	3.13915856343509	0.0016943373850487	0.0318590980434566
ENSG00000214041	19.6860201599537	4.6180866373559	1.47169270364397	3.13794219806983	0.00170138424717275	0.0319566768259904
ENSG00000186526	7.36282034590609	-4.78802251835113	1.52618708041061	-3.1372448239196	0.00170543654617161	0.0319978579900574
ENSG00000254726	324.784848473646	1.13866086071283	0.363075004513285	3.13615877314177	0.00171176504623612	0.0320816096083796
ENSG00000230373	77.4293966490835	1.63127585630187	0.520330737644342	3.13507494038702	0.0017181021473622	0.0321653399840768
ENSG00000113721	288.047866762474	1.48955487590889	0.475272146740646	3.13410934371825	0.00172376609584942	0.0322362996511839
ENSG00000001036	647.403073755283	0.782629945004807	0.249774298447524	3.13334858658099	0.00172824059497023	0.03228488538161
ENSG00000174502	645.971877950345	3.66840381953196	1.17174933885044	3.13070696769576	0.001743860708814	0.0325060926274593
ENSG00000266714	175.105053028449	2.02428677699697	0.646579061372887	3.13076450805379	0.00174351908937102	0.0325060926274593
ENSG00000204282	188.890775787735	1.05731215585981	0.337829785799244	3.12971857516471	0.00174973845229049	0.0325803572204089
ENSG00000198467	586.590698235046	1.50349911847087	0.480574724314397	3.12854389214041	0.00175674770882617	0.0326755073841668
ENSG00000115652	998.335743812116	0.742284144262857	0.23750723886583	3.12531166547804	0.00177616764835943	0.0330010414579093
ENSG00000107902	329.560189155091	0.719926269631819	0.230556862782432	3.12255406732866	0.00179289170984236	0.0332758380451324
ENSG00000082512	56.3453382406547	1.62108288802484	0.519433405196039	3.12086760652797	0.00180319082330805	0.033430924692904
ENSG00000187634	22.9691081835747	2.88243837063623	0.923709351226811	3.12050361599994	0.00180542081352585	0.0334362379943081
ENSG00000118515	3301.15417527815	-0.926440529013124	0.297158578211872	-3.11766375578961	0.00182290645695754	0.0336489993786463
ENSG00000102316	2336.03407877979	0.559597583339871	0.17949724715687	3.11758309502549	0.00182340536823544	0.0336489993786463
ENSG00000168487	3172.61804442165	0.711421820601819	0.22821738067973	3.11729903516944	0.00182516336376468	0.0336489993786463
ENSG00000250073	8.2903503060214	-5.4076449465055	1.73485825199268	-3.11705290060108	0.00182668790582131	0.0336489993786463
ENSG00000187498	1347.44517856892	0.900604473150575	0.28882490559905	3.11816763614147	0.00181979264265408	0.0336489993786463
ENSG00000159023	1171.89539458398	-0.569697481273117	0.182879989215573	-3.11514389144881	0.0018385519814693	0.0338227856533048
ENSG00000275131	212.136460001642	1.09099391425548	0.350249720033388	3.11490303019081	0.00184005390127831	0.0338227856533048
ENSG00000206077	90.4120233462459	2.23275094420958	0.717100581843081	3.11358127540629	0.00184831595096104	0.0339383948092686
ENSG00000003096	78.7722905949455	1.80573699360002	0.580151563302725	3.11252629109573	0.0018549349112131	0.0339629002861503
ENSG00000187714	10.4746372785853	-3.59546418515932	1.15519711281736	-3.11242483665018	0.0018555725817484	0.0339629002861503
ENSG00000166823	13.7903231307204	2.82320548226955	0.907054180428243	3.11249927863917	0.00185510467264716	0.0339629002861503
ENSG00000273760	345.254362829819	-0.79420999963696	0.255256188420758	-3.1114230943847	0.00186187964183968	0.0340421245885778
ENSG00000249790	20.0821021132201	-4.85339796784035	1.56047104722457	-3.11021340413366	0.00186952221006173	0.0341455728493759
ENSG00000142864	11299.5041358037	-0.468468070055112	0.150687902494148	-3.10886316884865	0.00187808674018152	0.0342656228683172
ENSG00000165591	172.011663734489	-0.774784032508353	0.249359281401873	-3.10709923509803	0.00188932965204646	0.0344342337536646
ENSG00000147027	26.9200346505772	2.57648102677338	0.829356389786484	3.10660297370674	0.00189250383299516	0.0344555856578642
ENSG00000110107	2192.28529068383	-0.562316863014391	0.18106288512437	-3.10564400113332	0.0018986514829923	0.0344945076714705
ENSG00000185338	74.721902909638	1.4873859689638	0.4789201041634	3.1057079375735	0.00189824103805583	0.0344945076714705
ENSG00000236039	26.6489467886591	2.60686503533923	0.839673703530056	3.10461673907347	0.00190525725667677	0.034577455798674
ENSG00000165915	673.16529426722	0.912277876713984	0.29387464622784	3.10430957016516	0.00190723659127821	0.034577455798674
ENSG00000185904	11.5578636057838	5.51898634017777	1.77881987695411	3.10261112531977	0.0019182151584627	0.034739886106685
ENSG00000123106	753.410466111639	0.744245294698054	0.239956058613388	3.10158992858423	0.00192484397091634	0.0348232813034864
ENSG00000198363	5481.41063017058	0.960599076988967	0.309848609995795	3.10022070779018	0.00193376489481879	0.0349479254362996
ENSG00000138621	265.076347890438	-0.655342063469963	0.211449399221999	-3.09928553063386	0.00193987968370337	0.035021647385222
ENSG00000138771	610.33913352821	1.70553969222751	0.550401730550191	3.0987178956044	0.00194359989926145	0.0350520296297623
ENSG00000230409	181.423058199252	1.25086856904534	0.403864909198554	3.09724499592604	0.00195328368789505	0.0351897862306119
ENSG00000116117	116.697057666985	1.06570087580222	0.344181472767346	3.09633423099039	0.00195929378451092	0.0352611397097389
ENSG00000227725	30.7935804762301	-1.65187975486444	0.533901505708133	-3.09397845333569	0.00197491828781226	0.0355022511216833
ENSG00000160209	5263.73795660375	0.608030001813609	0.196538560521082	3.09369316739444	0.00197681816765897	0.0355022511216833
ENSG00000137745	78.4441141344106	4.44073645806093	1.43589184977234	3.09266777909841	0.00198366066619443	0.0355859789957252
ENSG00000227081	1153.46838458634	-0.681690506576543	0.220442365336839	-3.09237521351629	0.00198561696227238	0.0355859789957252
ENSG00000085831	544.842981259183	-0.887080199520921	0.286932786843678	-3.09159580290211	0.0019908372873938	0.0356424095001149
ENSG00000118322	2156.92807036775	-0.987032928760003	0.31938589626352	-3.09040862576354	0.00199881295550476	0.0357480009349889
ENSG00000106031	132.834689223288	6.66314073646838	2.15688942252747	3.08923613184603	0.00200671875246912	0.0358149337512772
ENSG00000006432	1725.32688126533	0.606706310777174	0.196386466955317	3.08934887511987	0.0020059573111073	0.0358149337512772
ENSG00000122223	5.1103507330006	-6.11288002473295	1.97915304791972	-3.08863431817876	0.00201078774827669	0.0358402899311298
ENSG00000105835	24052.4505501581	-0.75820768095659	0.245500972500278	-3.08841009155567	0.00201230572935027	0.0358402899311298
ENSG00000213178	513.641875756384	-0.573282678436911	0.185725044848387	-3.08672790417091	0.0020237274713894	0.0359931892372421
ENSG00000165185	153.33813630427	-0.967423998167342	0.31343417082674	-3.08653008577714	0.0020250745237809	0.0359931892372421
ENSG00000134871	2156.26931528697	0.855086134042452	0.277186299661819	3.08487878039318	0.0020363512963714	0.0361562683736532
ENSG00000143951	106.311828380954	0.976247287967281	0.316647472586117	3.08307304648319	0.00204874859346823	0.0363388861346607
ENSG00000164111	3124.8863354205	0.793954900589878	0.257700346678736	3.08092290453792	0.00206360072903221	0.0365646246580836
ENSG00000164506	1462.43195992014	-0.650931106533485	0.21130481810232	-3.08053130250104	0.00206631633486273	0.0365700804907365
ENSG00000184113	6.4196961253131	6.01293441099627	1.95208300505063	3.08026574456054	0.0020681597394645	0.0365700804907365
ENSG00000172965	349.134355196344	0.815376888930445	0.264760564686119	3.07967649901751	0.00207225545195527	0.0366048819824337
ENSG00000111371	5038.29274437562	-0.89391127039543	0.290307852052947	-3.07918392173697	0.00207568495335436	0.0366077260815089
ENSG00000130479	448.818011262543	0.755296196986712	0.245302312637014	3.07904230036494	0.00207667193580661	0.0366077260815089
ENSG00000073712	168.120306596235	1.06162698105182	0.344858714112091	3.078440351392	0.00208087182179242	0.0366442166775216
ENSG00000177697	4498.45718339748	0.637331364855304	0.207063631605579	3.07794932366158	0.00208430356243097	0.0366671194188392
ENSG00000136717	317.141656268957	1.43850502297242	0.467562473247005	3.0766049571572	0.00209372577712367	0.0367952522935778
ENSG00000132661	265.647000046204	-0.850306118684016	0.276634628972744	-3.07375154672987	0.00211385396218484	0.0371110789993777
ENSG00000186340	2057.73738003383	-1.23847454958903	0.403303810267676	-3.07082283395003	0.00213469774368936	0.0374388121102706
ENSG00000196459	305.57162276121	0.645680008027526	0.210403796950029	3.06876595093421	0.00214944914884639	0.0376591370732201
ENSG00000113248	37.7624372602439	1.92174599495675	0.626689801139857	3.06650274419877	0.00216578820284896	0.0378693561662771
ENSG00000246100	29.5214962645806	-3.09745328338732	1.01009590906362	-3.06649423643218	0.00216584983828054	0.0378693561662771
ENSG00000135374	11.9543276709337	-3.1883958295072	1.04123472824559	-3.06212974175326	0.00219768174103785	0.0383225939792065
ENSG00000136378	352.657515352349	1.82849026388673	0.597061165384616	3.06248399644089	0.00219508212664931	0.0383225939792065
ENSG00000127585	72.9052231686517	1.5118445172568	0.4937401628697	3.06202458489444	0.00219845395277401	0.0383225939792065
ENSG00000129009	10.3192342542707	3.30733173957255	1.08038804064046	3.06124430775071	0.00220419163472441	0.0383837217362688
ENSG00000259479	39.3798133369148	-1.83491620987255	0.599574782621856	-3.06036254868613	0.00221069206879422	0.0384579949884778
ENSG00000178750	122.034259795538	-1.05904617062209	0.346345501948863	-3.05777371053734	0.00222987894536445	0.0387134886528711
ENSG00000237523	115.689188131259	1.55142693251054	0.507338698998596	3.05797081037344	0.00222841281333145	0.0387134886528711
ENSG00000113645	1202.64842462029	-0.785477515195716	0.257018452042084	-3.05611332165016	0.00224226492178682	0.0388892822372402
ENSG00000273989	5.51157596572731	5.22557108101223	1.71048246037871	3.05502757383157	0.00225039831282587	0.0389910402539467
ENSG00000250295	11.8238601783216	2.769455402974	0.906632941587396	3.0546600238516	0.00225315776641704	0.0389995768321984
ENSG00000189144	53.0929603192766	-1.11201087388463	0.364081306557021	-3.05429269192778	0.00225591868003961	0.0390081214975693
ENSG00000143420	3419.07286588898	-0.557174990579693	0.182658402978506	-3.05036604664312	0.00228562611720935	0.0392606609805956
ENSG00000027847	594.180823335757	0.759757411178466	0.24900056105974	3.05122770786121	0.00227907660689177	0.0392606609805956
ENSG00000107159	186.818439448091	1.14718445810966	0.375889523292071	3.05191921302442	0.00227383289754505	0.0392606609805956
ENSG00000240036	185.499514353538	-1.22644534128438	0.401906586998676	-3.05156815279672	0.00227649361746988	0.0392606609805956
ENSG00000062282	502.504430425373	-1.70497724107656	0.558807771275558	-3.05109794229365	0.0022800618576007	0.0392606609805956
ENSG00000166106	414.169109731877	1.03103792907129	0.337978868492647	3.05059879533186	0.00228385529060076	0.0392606609805956
ENSG00000265787	5.17802064390998	4.98903274603701	1.63561349951793	3.05025163188459	0.00228649708239214	0.0392606609805956
ENSG00000162385	420.753070158569	-0.636588425087677	0.208807240359485	-3.04868942279836	0.00229841961876765	0.0394260314465577
ENSG00000165434	489.700256280948	1.4754462665775	0.484093422704318	3.04785439623436	0.00230481573910081	0.0394570694440094
ENSG00000141401	846.129205538609	-1.28790073432767	0.422518953820969	-3.04814901835951	0.00230255713927084	0.0394570694440094
ENSG00000077063	39.2015162245727	2.1177606113849	0.69541503201558	3.04531900216022	0.00232433633220454	0.0397516964170766
ENSG00000147003	11.5354174352416	2.77557207550991	0.911737761019007	3.04426579020681	0.00233248967856095	0.0398515242498919
ENSG00000284128	5.41671422483043	-5.6310700751535	1.85053484294189	-3.04294193466874	0.00234277533797699	0.0399875492955298
ENSG00000065717	200.883650965154	1.47155838257777	0.483708606986002	3.0422414679513	0.00234823438118519	0.0400410034968198
ENSG00000050327	110.729984346215	-2.51780576926699	0.827716170262072	-3.0418709452901	0.00235112673407367	0.040050629168057
ENSG00000196639	657.464697386863	-0.871473096677403	0.286933198749149	-3.03719855519154	0.00238788107763391	0.0406364925229391
ENSG00000064692	14.4067562890034	-3.80996287126635	1.25470731612381	-3.03653515230671	0.00239314202505971	0.040685779190862
ENSG00000163686	184.679575681849	0.903471155537602	0.297666127389798	3.03518295299517	0.00240389816603581	0.0407077440419745
ENSG00000122778	77.374005756669	1.64218112445883	0.541009536517684	3.03540143678254	0.00240215723313119	0.0407077440419745
ENSG00000029993	1010.43255623696	1.01157067913618	0.333257264817842	3.03540473360455	0.00240213097207836	0.0407077440419745
ENSG00000185100	852.605314520413	1.35795802321497	0.447313585868262	3.03580768864663	0.00239892318548018	0.0407077440419745
ENSG00000198948	76.6130196743013	-1.14657720675499	0.377953783331813	-3.03364394621864	0.00241619411066188	0.0408036081653317
ENSG00000242498	1088.76007659111	-0.673739156110115	0.222063216515551	-3.0339971053375	0.00241336745599564	0.0408036081653317
ENSG00000100373	5.01376117959953	6.40549255901811	2.11152633670114	3.03358402293266	0.00241667403199494	0.0408036081653317
ENSG00000100767	614.447571463927	1.53251216267197	0.505502394144207	3.03166153202191	0.00243211750458443	0.0410240996729168
ENSG00000156535	5536.35828338979	0.892645413204715	0.29460004687958	3.03002468146107	0.00244533754480932	0.0412066919279572
ENSG00000078098	759.735477168676	1.8133911066767	0.598872038660099	3.02801097665861	0.00246169145483375	0.0414416844231063
ENSG00000151693	1582.62802471985	0.769258384627369	0.254304389756976	3.02495126160624	0.00248673196495952	0.0418223103197738
ENSG00000116679	5457.16310606721	0.752093430733436	0.248773822962165	3.02320164468357	0.00250115523144172	0.0420238044501511
ENSG00000140545	2360.83073591124	1.28942929148142	0.426589550356031	3.02264621907701	0.00250574995632766	0.0420599297547487
ENSG00000163531	246.393540499606	-1.13067576257638	0.374147621350448	-3.0220044123101	0.00251106887966291	0.0421081287276807
ENSG00000162975	7.577394664442	4.20054675958754	1.39071118047185	3.02043071097073	0.00252415454488709	0.042286347560645
ENSG00000135736	95.4153786721517	1.02487601306107	0.339437852988335	3.019333300745	0.00253331662952057	0.0423985531234449
ENSG00000171566	1551.43040612266	-0.535772275656182	0.177476357875827	-3.01883745006217	0.00253746636800814	0.0424267335875414
ENSG00000106624	116.957349111441	1.39389910184583	0.461832179513105	3.01819397538599	0.00254286083019458	0.0424756510519395
ENSG00000010310	193.069235104772	1.81071813750698	0.600080149591613	3.01746048213604	0.00254902273919856	0.0425372805314367
ENSG00000115306	9944.31467038168	0.879607641457068	0.291566196896082	3.01683683095325	0.00255427262844763	0.0425542180671504
ENSG00000110651	5786.11415573956	0.534246214071789	0.177110383275092	3.01645902511534	0.00255745780188512	0.0425542180671504
ENSG00000166770	62.7108832065248	-1.1333331999588	0.375712701985102	-3.01648891286017	0.0025572056945705	0.0425542180671504
ENSG00000138378	56.7291442009944	1.5020228709569	0.498038935993625	3.01587438733128	0.00256239387671107	0.042595156182429
ENSG00000248508	50.2954947292799	1.2004793630802	0.398134634197422	3.01525981405807	0.00256759208739748	0.0426403685942796
ENSG00000204560	15.3112031548781	-3.62224428249453	1.20180130978287	-3.01401259343691	0.00257817103872023	0.0427592264553448
ENSG00000011201	50.6986266314764	-2.01166734711787	0.667478615356285	-3.01383040720201	0.00257971967803824	0.0427592264553448
ENSG00000213412	14.1592389491969	-3.63148987490269	1.20517953276599	-3.01323560197552	0.00258478163005588	0.0428018940761418
ENSG00000035664	439.691457998621	-1.19747007321623	0.397595366721367	-3.01178075361079	0.00259720107712815	0.0429661966653748
ENSG00000128536	12.2401381635439	2.4405019448248	0.810520498025246	3.01103050542317	0.00260362694033136	0.0430311253683008
ENSG00000138080	94.7846572295868	1.46364511288931	0.486433197052369	3.008933439902	0.00262166544573127	0.0432461687380695
ENSG00000196923	1380.07622970849	0.96134389105899	0.319470712424679	3.00917690940337	0.00261956532711128	0.0432461687380695
ENSG00000067141	497.420970052611	-0.760722246486162	0.252885081354045	-3.00817368273748	0.00262822885673038	0.0433129094636458
ENSG00000165233	373.210917710678	0.774315062362659	0.257457110968544	3.00754972138744	0.00263363038105426	0.0433189394895206
ENSG00000141622	44.2992721967582	1.65522796148056	0.550334046203756	3.00767865062764	0.00263251343208301	0.0433189394895206
ENSG00000231584	65.630276103389	1.35457798582548	0.450628571715502	3.00597447842405	0.00264731216238299	0.0435023932701044
ENSG00000140284	217.736285527925	-1.59769097773665	0.531732365519492	-3.00469010603809	0.00265851563257047	0.0436448105518845
ENSG00000006453	2581.66663220119	0.464822171513769	0.15482901521877	3.00216449001491	0.00268067285014618	0.0439548546871448
ENSG00000284690	6.13095583185634	6.55462011603267	2.18344986976373	3.00195585289162	0.00268251074812566	0.0439548546871448
ENSG00000134668	102.042578639696	1.92596606201379	0.641708360655768	3.0013105330989	0.00268820270367158	0.0440062107675257
ENSG00000187605	1628.42235369039	-0.628834429235744	0.209567071739137	-3.00063566292752	0.00269416710904986	0.044061925010649
ENSG00000102038	1112.07043636523	1.10723385176432	0.369449629945975	2.99698189419279	0.00272666907220039	0.0445511314218496
ENSG00000283000	209.806001561729	-1.49580802277418	0.499171265946293	-2.99658278594728	0.00273024094186954	0.0445671683158116
ENSG00000151135	689.355397415991	0.814860028899417	0.271993801653485	2.99587719994271	0.00273656613391598	0.0446280761459947
ENSG00000102226	551.05218774173	0.598229145236771	0.199709070595143	2.99550312589217	0.00273992493030309	0.0446405382820688
ENSG00000114529	92.8026375931138	1.21776445072874	0.406898415671792	2.99279722856183	0.00276433345152923	0.0449956074111262
ENSG00000156049	36.702322308011	-2.63379675892097	0.880145207614877	-2.99245708109727	0.00276741576143304	0.0450032024342679
ENSG00000196872	304.352561024286	-1.30522618427366	0.436314641252356	-2.99147922363381	0.00277629429290297	0.045104951189231
ENSG00000138678	60.0214169906417	-2.22179133865274	0.74303293013176	-2.99016537296504	0.0027882644633034	0.0451722635058574
ENSG00000180543	270.80120129763	-0.814759575538577	0.272480266162862	-2.99015993712951	0.00278831408562746	0.0451722635058574
ENSG00000103034	1202.62722917658	-0.847594988837672	0.283433716512553	-2.99045222730279	0.00278564698894508	0.0451722635058574
ENSG00000171517	902.655590004275	-1.08999263334063	0.364662183929921	-2.98904762098968	0.00279848511489809	0.045251819926524
ENSG00000085063	12330.7022440528	0.797457378463419	0.266791185713351	2.98906943395136	0.00279828533168345	0.045251819926524
ENSG00000128710	137.958805176425	6.3581282634991	2.12875388506628	2.98678410318023	0.00281928744855059	0.0455453901899651
ENSG00000248527	10819.2661581722	1.55212703659439	0.519752511578565	2.98628097415124	0.00282393047815282	0.0455776021356653
ENSG00000165169	2083.91255433088	0.649481617319583	0.217536251857139	2.98562474886306	0.00282999681962753	0.0456327041065526
ENSG00000186469	59.9415650899093	1.93368155120554	0.648098325011434	2.98362374439315	0.00284856823495596	0.0458891540097541
ENSG00000271601	343.546943873225	1.01818582768284	0.341444148980414	2.98199817077916	0.00286373709944594	0.0460472867252031
ENSG00000075643	527.200128090473	-1.18199459126244	0.396343946697286	-2.98224459112329	0.0028614329226006	0.0460472867252031
ENSG00000125735	87.8474524397164	4.79152070163453	1.60752805941296	2.98067624610192	0.00287612682430781	0.0462033258750849
ENSG00000210082	189266.934088046	1.37276804468406	0.460656997086296	2.98002212788901	0.00288227561998918	0.0462589104868599
ENSG00000151882	134.621521091842	1.70089141945694	0.571234292217312	2.9775723247544	0.00290541086251755	0.046586760381747
ENSG00000233608	92.3128156320225	1.91388602302299	0.642917353480896	2.97687721860484	0.00291200604662639	0.0466490354117384
ENSG00000078808	3674.46616151494	0.463383316680989	0.155699328407931	2.97614203875646	0.00291899631675494	0.0467175177951337
ENSG00000171365	297.178286114381	-0.657120434589661	0.22084798812179	-2.97544224956797	0.00292566430695629	0.0467807197037016
ENSG00000171992	1554.33835754967	0.823829045014279	0.27691057561651	2.97507252361207	0.00292919287630575	0.0467936522161935
ENSG00000141441	765.384219543982	-0.745517692037145	0.250656438691401	-2.97426108792281	0.00293695062902795	0.0468740589725657
ENSG00000135976	44.9742539628491	1.32203625729602	0.445279518234868	2.96900307145655	0.00298767610130392	0.0476394507163428
ENSG00000183569	261.007956968143	3.02585570235857	1.01925875578743	2.9686825697376	0.00299079376053489	0.0476450061574099
ENSG00000164465	1530.3664346962	1.38127054578673	0.465470206818676	2.96747359025882	0.00300258076084132	0.0477885309808278
ENSG00000247624	5.49580968499932	-4.77657594019859	1.6109670014336	-2.96503648799008	0.00302647031064349	0.0480737868273637
ENSG00000214357	922.49438656895	1.05514933456085	0.355828475358902	2.96533135381194	0.0030235707151423	0.0480737868273637
ENSG00000122707	52.543713228459	1.65751308717366	0.559172707835147	2.96422386849096	0.00303447442572026	0.0480737868273637
ENSG00000057149	20376.8099199668	0.726383465792987	0.245018250039808	2.96460963897576	0.0030306722709745	0.0480737868273637
ENSG00000198786	91390.5591705112	1.48809780539498	0.50199292119338	2.96438005909992	0.00303293448687817	0.0480737868273637
ENSG00000157216	962.878051393512	-0.744737355006793	0.251514278833734	-2.96101421541602	0.00306627786144803	0.0485329444399387
ENSG00000273521	10.1262935024704	3.84502669442289	1.30013392001113	2.95740818329697	0.00310237128587021	0.0490590974020193
ENSG00000177706	408.04977599983	1.08800217890991	0.367969001767055	2.95677672218346	0.00310873140590724	0.0490797634199664
ENSG00000011478	199.394049579551	0.865764108747871	0.292813129455656	2.95671205166701	0.0031093834424739	0.0490797634199664
ENSG00000165511	9.87835114531724	3.10062105537154	1.04945759010051	2.95449867114172	0.00313177502202888	0.0493538449595596
ENSG00000179593	2936.87850768138	1.3003992388868	0.440152511581628	2.954428759736	0.00313248466700605	0.0493538449595596
ENSG00000079156	286.106745918374	-1.6740343233372	0.566804037206778	-2.95346224347108	0.00314231045209697	0.0493600951999875
ENSG00000120324	31.2756316203616	2.08065057483245	0.704442950442874	2.9536111810394	0.00314079449602166	0.0493600951999875
ENSG00000149257	2761.09520881289	0.724664263722723	0.245377634353668	2.95326126862178	0.00314435712520699	0.0493600951999875
ENSG00000122870	45.4480956382045	1.58690722917736	0.537203060240096	2.95401747798702	0.00313666240555896	0.0493600951999875
ENSG00000171766	82.7238807457067	-1.14194774939235	0.386717584523829	-2.95292429176306	0.00314779153283567	0.0493689638308456
ENSG00000114251	3470.99412082912	0.827287093714489	0.280327515371265	2.95114481580174	0.00316598440463569	0.0496090725699063
ENSG00000206159	8.31490264932737	-4.65128198367687	1.57640452122298	-2.95056371702639	0.00317194612479397	0.0496572639463879
ENSG00000120910	371.149861253113	0.663980625693557	0.225096893618831	2.94975472570453	0.00318026292284997	0.0497422032614852
ENSG00000112245	67.2767037945837	-1.41069282695314	0.478396005352342	-2.94879725409528	0.00319013184436829	0.0498331825410599
ENSG00000147416	2051.64788863906	-0.599550033043919	0.203351155574379	-2.94834829608147	0.0031947689824347	0.0498331825410599
ENSG00000130584	103.157068428361	1.10929125483518	0.376220239082448	2.94851562887897	0.00319303993997027	0.0498331825410599
ENSG00000188738	18.8102836764366	2.62902075930109	0.891961441193654	2.94746010072234	0.00320396095941729	0.0499312937561363
ENSG00000226124	8.59639536255162	-2.97626516010032	1.01001962269457	-2.94673993774509	0.00321143164740827	0.0500024266910944
ENSG00000156689	7.72604199211045	4.83683828936386	1.64205769374114	2.94559582638292	0.00322333285630992	0.0500970567234075
ENSG00000249628	13.6983366403251	2.8512862286671	0.967915921730289	2.94579949007349	0.00322121138179762	0.0500970567234075
ENSG00000039560	2535.96115089283	1.06176712650824	0.360629790924718	2.94420248473007	0.00323788086257199	0.0501871533698659
ENSG00000164520	387.217737170121	-1.21783519634178	0.413634716612945	-2.94422868156242	0.00323760678813771	0.0501871533698659
ENSG00000100290	165.08649445839	1.00642935263871	0.341829177900661	2.94424647661643	0.00323742062618296	0.0501871533698659
ENSG00000182463	123.875821860049	-1.07483317674833	0.365109188867441	-2.94386777851971	0.00324138446049351	0.050196237302242
ENSG00000139197	733.581189200245	-0.558863056105342	0.190052178890707	-2.94057694769565	0.00327601622212752	0.0506869236526115
ENSG00000198176	2409.15822824282	-0.487806529887624	0.165908842793631	-2.9402081388416	0.00327991839301293	0.0507017034607255
ENSG00000142910	6086.95238133215	1.02726802846994	0.34947334506107	2.93947462084821	0.00328769194559395	0.0507762476875618
ENSG00000178573	2660.72632291554	0.902494960682751	0.30705850493574	2.93916288321543	0.00329100070470676	0.0507817642372016
ENSG00000124155	1385.61503099532	0.669726047775004	0.227934330748215	2.93824122753501	0.00330080083555776	0.0508873462148488
ENSG00000150593	6212.92610646788	-0.743760600347712	0.253156960667337	-2.9379425254084	0.0033039826880858	0.0508907987005517
ENSG00000174996	1092.3293089059	0.551320768692704	0.187677617868309	2.9375946634167	0.00330769172538261	0.0509023579026904
ENSG00000133641	1248.67352924469	-0.653585913603596	0.222522310379958	-2.93717026615262	0.00331222194669241	0.0509265224243457
ENSG00000213859	1538.72855693759	0.900272810126187	0.306739807149723	2.93497221143767	0.00333577560262036	0.0512428743241815
ENSG00000185950	610.322441269462	0.848114712319221	0.289111606131251	2.93352011587592	0.00335141936157433	0.0514372614771511
ENSG00000197312	2504.89236360029	-0.616711586783266	0.210319315033354	-2.93226319553896	0.00336501436386741	0.051523734589743
ENSG00000254016	5.99997223570095	-4.57116084147145	1.55896921053161	-2.93216877574682	0.00336603764480507	0.051523734589743
ENSG00000167861	335.049743247775	1.40485048654341	0.479028119915526	2.9327098517539	0.00336017753501865	0.051523734589743
ENSG00000174938	477.18684652493	1.35372675115921	0.461741817593737	2.93178286994635	0.00337022287154247	0.0515419417821228
ENSG00000185420	127.40859435406	1.00267533396863	0.342388159052702	2.92847549618178	0.00340628680594221	0.0520403782476422
ENSG00000198804	367300.272479393	1.46288563945509	0.499578401671795	2.92824036139207	0.00340886406771827	0.0520403782476422
ENSG00000189051	141.853941363502	-1.60891348956247	0.549742807253662	-2.92666583051825	0.00342616795654315	0.0522581734861036
ENSG00000254851	6.54400438161083	-4.74707714784249	1.62284249122932	-2.9251619756681	0.00344276974231733	0.052464883451346
ENSG00000149929	225.095936811616	-0.742176345090795	0.253752268766265	-2.92480673650419	0.00344670207657868	0.052478326750032
ENSG00000168994	759.921502428717	0.503758431710441	0.172323753992773	2.92332554298678	0.00346314230716066	0.052635480030653
ENSG00000118557	81.5307695636605	-1.72836358110019	0.591183995352016	-2.92356287499132	0.00346050329235611	0.052635480030653
ENSG00000019144	755.71476131125	0.921993969480151	0.315468160901978	2.92262130937084	0.00347098382266725	0.0526859675175625
ENSG00000275216	343.95327865559	1.47617744861235	0.505154928954316	2.92222715052603	0.0034753797609356	0.0526859675175625
ENSG00000100897	35.1998695553097	-1.90498382606055	0.651899925935939	-2.92220285701911	0.0034756508650063	0.0526859675175625
ENSG00000136802	6269.02843660644	0.864525285003426	0.296056969874981	2.92013150498871	0.00349883708119283	0.0529559114924697
ENSG00000246705	1051.30257453397	-0.886503942281696	0.303590768367293	-2.92006225040801	0.00349961472635501	0.0529559114924697
ENSG00000182544	734.12472636917	-0.817157931889668	0.280006299690211	-2.91835552554976	0.00351882895000508	0.0531998700218255
ENSG00000206072	188.967625086343	1.38249944033505	0.473785878587235	2.91798363526045	0.00352302838810342	0.0532165965033533
ENSG00000224078	708.371073816208	0.922131928899658	0.316105290208835	2.91716702460263	0.00353226567654088	0.0533093254077946
ENSG00000171811	22.662220153475	1.6959900739442	0.581575114384144	2.91620124726306	0.00354321873879418	0.0534277637168745
ENSG00000131080	107.618797959709	1.07624611774407	0.369105062002768	2.91582594913314	0.00354748339582206	0.0534452292689304
ENSG00000139865	17.0088442966642	2.20943033292949	0.757913390274997	2.91514883003694	0.00355518957583656	0.0535144677622642
ENSG00000245498	7.37495559521547	-2.8972234401669	0.994056287251161	-2.9145466683567	0.00356205546835806	0.0535709478436192
ENSG00000159399	6324.25825740101	1.03690742254094	0.356037344828997	2.91235578964044	0.00358713793584913	0.0539010551845277
ENSG00000106066	57.2233473871726	-2.88923105989511	0.992253132007012	-2.91178829947467	0.00359366104007933	0.0539519530493586
ENSG00000232063	9.18935000318288	-3.4821329064014	1.19601659761223	-2.91144195937853	0.00359764740027485	0.0539647110041227
ENSG00000197461	272.740165179692	1.0789575122377	0.370854008170785	2.90938614243268	0.00362139267561262	0.0542735722856404
ENSG00000153823	59.6916346640991	1.50434852514744	0.517534215897792	2.90676148346592	0.00365191536697587	0.0546198927469003
ENSG00000236130	20.9254719355471	3.9684860890237	1.36534516666335	2.90658083092785	0.00365402479230934	0.0546198927469003
ENSG00000166250	833.61773773713	2.45245288189963	0.843741005635149	2.90664180775886	0.00365331266035805	0.0546198927469003
ENSG00000119121	39.9251109176642	-1.41543817676136	0.487045767082687	-2.9061707798829	0.00365881694723447	0.0546440499801815
ENSG00000186854	15.6715381499393	2.30391309613865	0.793153419319055	2.90475088428242	0.00367545506936366	0.0548078984556458
ENSG00000128285	6.79310153060243	-4.03558020980902	1.38933204530417	-2.90469094371569	0.00367615895482797	0.0548078984556458
ENSG00000170955	264.240192476385	1.0883511762399	0.374812643799346	2.90372055010648	0.00368757140866231	0.054930446827736
ENSG00000236008	7.95587763411344	3.42127487102369	1.17840527521533	2.90330919504625	0.00369241892329708	0.0549550757572027
ENSG00000274565	11.690311677538	2.66061584349322	0.916748563139121	2.90223072112899	0.00370515545751492	0.0550969746296839
ENSG00000164136	123.924401851932	0.754864092970102	0.260200872373756	2.90108209893241	0.00371876433733243	0.0552515893124391
ENSG00000185033	14167.5073724853	0.714612075203028	0.246405478218757	2.90014686511394	0.00372987853435512	0.0553689043861776
ENSG00000077348	294.875011483855	-0.686407540110612	0.236717477521956	-2.89969100421386	0.00373530686425198	0.0554016849995305
ENSG00000115355	546.196735137003	1.10440869506451	0.380950084560173	2.89909030034633	0.00374247093071603	0.0554601312342543
ENSG00000135617	187.870364158513	-0.745408903748204	0.257190505748543	-2.89827535265628	0.00375221005997371	0.0555566042012459
ENSG00000164430	168.517907019755	1.11826674061129	0.386020838195208	2.89690770539644	0.00376860607145949	0.0557034943809798
ENSG00000107551	182.305182089227	1.47501525595846	0.509139105685928	2.89707712388596	0.00376657147387055	0.0557034943809798
ENSG00000101608	5082.78700863788	0.671410358779208	0.231806688941764	2.89642357536923	0.0037744256411655	0.0557416250268262
ENSG00000198727	81757.4038631913	1.53512850685824	0.530277645426107	2.89495233317762	0.00379216112377981	0.0559555164104902
ENSG00000206190	26.4350323675299	2.71923305175799	0.940133965088312	2.89238890704534	0.00382324365029596	0.0563658157697875
ENSG00000143653	348.335192380113	1.05637233455928	0.365548477644889	2.8898282968244	0.00385452296666437	0.0567783113368668
ENSG00000127528	12.1631336751186	2.61622202611301	0.905707503967733	2.88859484397759	0.00386967311119597	0.0569527167477559
ENSG00000168056	1200.53078338681	1.16769317471309	0.404321331118902	2.88803257419454	0.00387659724165533	0.0570058594381881
ENSG00000174130	99.4038143640778	1.41849928833789	0.49145316901975	2.88633663949552	0.00389755023176469	0.0572650313727682
ENSG00000130635	1446.24459416757	1.25084099650113	0.433437465992937	2.88586265526367	0.00390342459215077	0.0573024062354556
ENSG00000115756	440.646972457055	0.789071005807301	0.273604708469613	2.88398182261156	0.00392681419081896	0.05759662246636
ENSG00000105223	3179.10945065403	0.569457664689776	0.197521616111865	2.88301440571075	0.00393889427034773	0.0577245961851216
ENSG00000104490	101.381278435089	1.326909285293	0.460300558073097	2.88270188254319	0.0039428039355337	0.0577327163496658
ENSG00000134121	451.859399172433	3.13845298433162	1.08994095410898	2.87947064701068	0.00398343377064709	0.0582780425374007
ENSG00000196954	2359.68218199114	-0.503763390452616	0.174971873635738	-2.8791106821052	0.00398798345502524	0.0582950342767283
ENSG00000163053	173.784734841428	1.24644764250228	0.433022335167389	2.87848348981919	0.00399592196506796	0.0583614918582294
ENSG00000142623	154.474865357009	1.94254542334179	0.675099112370247	2.87742257062313	0.00400938291833929	0.0584501149928898
ENSG00000197416	48.2656691562007	1.94982168919172	0.677679711913067	2.87720239357238	0.00401218168012804	0.0584501149928898
ENSG00000183255	5483.47272178041	0.609531197314232	0.211830392076756	2.87744922406305	0.00400904423570913	0.0584501149928898
ENSG00000162511	12.7449322206363	3.4828458120532	1.21084985938446	2.87636471612073	0.0040228459636909	0.0584557955443283
ENSG00000101911	780.639501351693	-0.486297497315873	0.169081989838966	-2.8761046506433	0.00402616202964423	0.0584557955443283
ENSG00000137752	954.704664570929	-0.529827627462291	0.184207619670909	-2.87625250469464	0.00402427645486654	0.0584557955443283
ENSG00000004660	65.7400484267186	-1.4259964738773	0.495781862415864	-2.87625785043578	0.0040242082959355	0.0584557955443283
ENSG00000131378	556.194549856548	0.862919598525319	0.300166791705022	2.87480035224324	0.00404283045394477	0.0586483119393927
ENSG00000113269	439.306191258873	0.82018385436635	0.28534707613777	2.87433768541702	0.004048758190151	0.0586848227982712
ENSG00000163564	8.09494717613396	-3.57302214615238	1.24344448000447	-2.87348748063084	0.00405967167693426	0.0587934774424697
ENSG00000077684	160.45445603008	-0.774057639972782	0.269456966811964	-2.87265773503992	0.00407034828180886	0.0588985216051484
ENSG00000117115	33.7227517050086	1.99887781398382	0.696240579485123	2.87095850612731	0.00409229238431444	0.059166294514395
ENSG00000169554	46.3926052503761	2.24620230365489	0.782682656867938	2.86987616749236	0.00410632578903144	0.0591811923191577
ENSG00000160999	46.0578371238788	1.3793717119443	0.480599268017942	2.87010780859701	0.00410331870493948	0.0591811923191577
ENSG00000254087	1516.90776166175	0.859839725781025	0.299610939616069	2.8698542412465	0.00410661053149663	0.0591811923191577
ENSG00000089159	3455.06349882699	0.700706100578068	0.244163954991474	2.8698179491831	0.00410708187323884	0.0591811923191577
ENSG00000278000	6.52675742163563	3.38326284626915	1.17915395027985	2.86922911589805	0.00411473618559807	0.0592418711909748
ENSG00000096060	4114.6297870278	-0.896225170090986	0.312387174299249	-2.86895635872826	0.0041182861728537	0.0592434060233678
ENSG00000176454	2896.99531143142	0.986668266877106	0.343977800040984	2.86840681799682	0.00412544699361786	0.0592968383669134
ENSG00000163220	241409.152008426	-0.701805473012731	0.244711321435487	-2.86789131330708	0.00413217457430276	0.0593439595583297
ENSG00000128928	186.783631167996	1.56738171839805	0.54660194758203	2.86750115935661	0.00413727288499108	0.0593676230077327
ENSG00000038295	187.210514878776	1.38269931018843	0.482569496345151	2.86528535404871	0.00416633618351701	0.0597348450311752
ENSG00000083454	8.60554634513591	3.98449872112158	1.39097860420634	2.86452912293001	0.00417629749879166	0.0597780353300421
ENSG00000087074	2221.80816032574	0.660395560624604	0.230526161755002	2.86473151505666	0.00417362941038316	0.0597780353300421
ENSG00000135636	107.646582331601	2.32454626290584	0.812000448276903	2.86274012266696	0.00419994884916785	0.0600666001246325
ENSG00000078081	430.971014467815	-1.25666561577576	0.439081239713787	-2.86203440756182	0.00420931207612204	0.0601505101907638
ENSG00000131791	932.796967983213	0.545060573125832	0.190541808009469	2.86058256096082	0.00422863433421807	0.0603264127033349
ENSG00000259207	16.1066821412107	2.49480571293705	0.87209278308901	2.86071133864941	0.00422691721890379	0.0603264127033349
ENSG00000120457	53.4499790518592	1.58488477871813	0.554183965094931	2.85985318692257	0.00423837171675106	0.0604152323004988
ENSG00000187231	902.089615457717	1.12184995634123	0.39239020993096	2.85901617305542	0.00424957118333036	0.0604842838207828
ENSG00000242512	17.0962853445164	-3.44779028558478	1.2060678396331	-2.85870344294532	0.00425376247736978	0.0604842838207828
ENSG00000100433	65.9271761237237	-2.18223715567585	0.763321146300192	-2.85887161157938	0.00425150816984173	0.0604842838207828
ENSG00000133056	746.608092318932	-0.866497112291645	0.30324957524448	-2.85737288038433	0.00427163697921424	0.0605383148495725
ENSG00000250722	452.977286698986	1.8526750831253	0.6483425341845	2.85755597611012	0.0042691732742848	0.0605383148495725
ENSG00000124702	1290.14587919894	-0.56016004699603	0.195987289531413	-2.85814477222129	0.00426125926644924	0.0605383148495725
ENSG00000186866	609.120261278356	0.787712308597044	0.275664911819342	2.85749935818192	0.0042699349778293	0.0605383148495725
ENSG00000124784	519.816699468829	-0.595124160421731	0.208348458632783	-2.85638859210687	0.00428490350474173	0.0605906493969806
ENSG00000165244	31.9559408115265	-2.1792929955548	0.762973578818022	-2.85631515436079	0.00428589481639787	0.0605906493969806
ENSG00000233695	33.1084123151991	2.04901179982056	0.717330041385878	2.85644219759969	0.00428418003334263	0.0605906493969806
ENSG00000129682	8.38232393020325	4.64837981003596	1.62769084833474	2.85581246266244	0.00429268606993688	0.0606368340174582
ENSG00000118596	1031.72311851286	-1.00355147346561	0.351763519119769	-2.85291515156782	0.00433201864874189	0.0611422320357704
ENSG00000169398	3653.83981593344	0.64608510135937	0.226525838508604	2.85214748839714	0.00434249470622717	0.0612398536234742
ENSG00000198707	361.652920754344	0.922729752527578	0.323577922094697	2.85164620179969	0.00434934799673351	0.0612862672266995
ENSG00000163069	464.755617484493	0.927528975162918	0.325367767237828	2.85070946958597	0.00436218072537809	0.0613250071715888
ENSG00000104369	216.081971123223	1.2290718429357	0.431191954953489	2.85040532138007	0.00436635476810208	0.0613250071715888
ENSG00000197457	141.912847855677	-1.00719740714389	0.35334269013996	-2.85048321431226	0.00436528544310394	0.0613250071715888
ENSG00000089351	464.01190373988	1.21080951651823	0.424700044025422	2.85097572640174	0.00435852966286401	0.0613250071715888
ENSG00000112406	1234.40968434941	-0.62382516579667	0.218925912221651	-2.84948071914429	0.0043790659862377	0.0614032846725506
ENSG00000165757	28.9284688041565	1.93837695354181	0.680208241978954	2.8496816620487	0.00437630062025605	0.0614032846725506
ENSG00000120915	352.310404973425	-0.798675296390859	0.280330153416989	-2.84905240002076	0.00438496577927267	0.0614359415573178
ENSG00000169239	120.634358882896	0.83544632715957	0.293304716783914	2.8483903577148	0.00439409911959789	0.0615138123292771
ENSG00000196247	422.325627798529	-0.722065750937906	0.253542819292173	-2.84790455889751	0.00440081202146938	0.0615576998612851
ENSG00000178966	190.566063569238	-0.871179455608906	0.306106173271568	-2.84600420271832	0.00442716105783106	0.0618759593826023
ENSG00000123096	54.6832132211541	1.45486162952902	0.511345881983505	2.84516152527841	0.00443889073558854	0.0619895414819812
ENSG00000160818	750.114580936293	-0.626112376520969	0.220109588966708	-2.84454838819253	0.00444744301151791	0.0620586026059737
ENSG00000143847	226.196407439875	1.7595700465454	0.618688584443716	2.8440318615665	0.00445465931188498	0.0621089250088987
ENSG00000163002	211.584622676385	-0.602665236556181	0.211943928986504	-2.84351261882362	0.00446192425114537	0.0621095523794144
ENSG00000249641	31.0067405165286	-1.80326473749761	0.634130458841482	-2.8436810002662	0.00445956718156236	0.0621095523794144
ENSG00000147036	75.1078976149703	0.883356404295952	0.310738478533251	2.84276478557009	0.00447240636122908	0.0622051345553325
ENSG00000229124	12.163984480617	2.74263045111549	0.965900037669221	2.83945578647417	0.0045190557152474	0.062803193522481
ENSG00000117385	550.151666658552	0.838277061164467	0.295299688209567	2.83873330936118	0.00452929944325776	0.0628947513488699
ENSG00000151117	253.982220758433	-1.45520961487923	0.513062032808122	-2.83632294308447	0.00456362744566461	0.0633203308085965
ENSG00000146938	12.1427606276998	3.49324231416617	1.23203989813865	2.83533213448989	0.00457780657888725	0.0634615510285935
ENSG00000095752	208.250433625919	1.98523197208813	0.700234322517987	2.83509663586525	0.00458118258515043	0.0634615510285935
ENSG00000198886	154334.988741837	1.40994417379802	0.497584420697696	2.83357781142151	0.00460301001648933	0.0637126205419943
ENSG00000144935	86.8147361895713	1.12405297691027	0.39700114673787	2.83135952161986	0.00463505890594003	0.0640531634350989
ENSG00000102879	97.5676051861817	1.42592178930132	0.503585076603347	2.83154099585136	0.00463242947607441	0.0640531634350989
ENSG00000182685	97.1526217672207	1.81453680478362	0.641420259047121	2.82893591087886	0.00467030504749923	0.0644884416871783
ENSG00000131669	377.49706103982	0.803732822667793	0.284195159929147	2.82810172723622	0.00468249245283028	0.0646048778275421
ENSG00000127418	380.502098328375	0.820078123524631	0.290028847899064	2.82757432395151	0.00469021265291157	0.0646595422222304
ENSG00000153064	31.4341315330805	2.46944825504754	0.873716923826914	2.8263710908005	0.00470786889235023	0.0648509882248885
ENSG00000110375	169.957699311535	-1.79930233798196	0.636682952616602	-2.82605703606056	0.00471248722162865	0.0648626741184967
ENSG00000167281	8.77214309055886	3.41046520598271	1.20697802251862	2.82562328588721	0.00471887247470863	0.0648986418284269
ENSG00000177380	430.652273007701	-1.00845393526013	0.356959839327428	-2.82511875050209	0.00472630961200276	0.0649490070882648
ENSG00000173406	5.21408852423431	3.63572035951954	1.28778552008927	2.82323438398927	0.00475418014634291	0.0652294810511997
ENSG00000168268	1033.20748419094	0.850154991366737	0.301174570782561	2.82279805083718	0.00476065486064012	0.0652294810511997
ENSG00000145284	850.13849980254	1.06435883195395	0.377137933234549	2.82220041570841	0.00476953607415969	0.0652294810511997
ENSG00000130560	1020.96746699832	-0.468763264261433	0.16606877434577	-2.82270562968945	0.00476202731480418	0.0652294810511997
ENSG00000150779	911.056889258557	-0.52304670837617	0.185332430263322	-2.82220822137291	0.0047694199807635	0.0652294810511997
ENSG00000123095	207.046178278775	1.66883746166217	0.591377358880148	2.82195020929163	0.00477325874126478	0.0652294810511997
ENSG00000100342	5890.41873191456	2.6979326683646	0.955935399084733	2.82229601597321	0.00476811439064377	0.0652294810511997
ENSG00000184014	761.841585054639	0.914973592065892	0.324430589406857	2.82024452052656	0.00479870677794137	0.0655251985035565
ENSG00000173821	6919.45033355939	0.766224866404187	0.271829077681823	2.81877447747167	0.00482073753079024	0.0657626596256235
ENSG00000183527	505.796195266423	-0.502823236518082	0.178396291695627	-2.81857448794945	0.00482374172900534	0.0657626596256235
ENSG00000164366	413.609635975265	0.760436344602961	0.269896703628793	2.81750882607606	0.00483977844668315	0.0659205824242565
ENSG00000123358	164.224000325949	1.92162828445506	0.682082518794233	2.81729590116465	0.00484298844430457	0.0659205824242565
ENSG00000250208	28.5227709649935	-2.21513851168914	0.786982416015026	-2.81472427669445	0.00488190996053633	0.0663978346806541
ENSG00000173530	828.539763052894	1.21505168557179	0.431719630524554	2.81444622774151	0.00488613513598611	0.0664028080684369
ENSG00000183087	1466.74570844987	0.57721764539171	0.20511591154677	2.81410467398134	0.00489132984502249	0.0664209392135848
ENSG00000175322	32.7643458807592	1.6343025286953	0.580834120747435	2.81371646450837	0.00489724020900853	0.0664487522050409
ENSG00000267296	26.0839592814167	-1.48106032890289	0.526532850337063	-2.81285455970085	0.00491038553171372	0.0665746123507758
ENSG00000119042	110.230254890745	1.23306442296329	0.438761185790674	2.8103315947176	0.00494904813201781	0.0669374813093213
ENSG00000145337	899.352598169391	-0.763098655234756	0.271580754675631	-2.80984069046491	0.00495660280081809	0.0669374813093213
ENSG00000164056	164.94576711241	-0.694437749408569	0.247082068504388	-2.81055502575347	0.00494561313635245	0.0669374813093213
ENSG00000043039	1766.94072290563	-0.758624613007214	0.269974454733816	-2.80998664764483	0.00495435553444981	0.0669374813093213
ENSG00000148655	14.4676075821226	2.49403957222333	0.88752319271502	2.81011199785532	0.00495242628400379	0.0669374813093213
ENSG00000162490	19.3360298577401	2.31543750913385	0.824524248347971	2.80821032707418	0.00498176783413353	0.0672245612441313
ENSG00000163399	22140.3191207701	-0.564310708586238	0.201017596277867	-2.80727020437649	0.00499633130789987	0.0672880049175632
ENSG00000168743	787.966547326957	1.44429061088179	0.51445421530483	2.80742302796762	0.00499396129499695	0.0672880049175632
ENSG00000106477	260.354353575687	0.801220009431046	0.285464790648962	2.80672095360549	0.00500485757596355	0.0672880049175632
ENSG00000110723	664.596010430304	-1.02581671052797	0.365495598313999	-2.80664586730996	0.00500602419613373	0.0672880049175632
ENSG00000184459	17.8394084192959	-4.16741730654192	1.48474891707901	-2.80681619538785	0.00500337815248501	0.0672880049175632
ENSG00000151655	7.08976956352975	3.35818860170543	1.19664053777053	2.8063470154221	0.00501066991270488	0.0672978734177108
ENSG00000182103	11.3208198381274	-4.03174498459246	1.43730684657407	-2.80506907359582	0.00503057979913754	0.0675125783495798
ENSG00000171889	39.573242266789	1.45406091422675	0.518678396062906	2.80339594874972	0.00505675461657041	0.0677581488925965
ENSG00000136052	35.2811005697823	1.76802970901475	0.630618514984075	2.80364383062777	0.00505286893224638	0.0677581488925965
ENSG00000178035	3228.82696027607	-0.381378759909501	0.136064709774577	-2.80292193722637	0.00506419252968388	0.0677968472630056
ENSG00000189325	5.38296973914874	4.04573549288063	1.4435085017424	2.80270984756736	0.00506752371869952	0.0677968472630056
ENSG00000106006	16.1117180129543	-2.55687088636507	0.912393639648657	-2.80237692949028	0.00507275669606291	0.0678141250627524
ENSG00000153885	970.147991548806	-1.07426449904942	0.383463890800668	-2.80147498844381	0.00508695842195682	0.0679511798523036
ENSG00000166173	226.444901333118	0.966573665732376	0.345156061543105	2.80039603364076	0.00510399456566276	0.0681258545401302
ENSG00000165458	2483.85408582519	1.03116140002544	0.368321738873933	2.79962133969611	0.00511625837428873	0.0682366087826647
ENSG00000140416	1841.96557328523	1.01991363497026	0.364370869987673	2.79910859779973	0.00512438998644189	0.0682921221663306
ENSG00000136244	47.3407803765523	3.11177541186795	1.1118081292785	2.79884211126188	0.00512862082780732	0.0682956047541989
ENSG00000162390	512.201150099457	-1.23918037514632	0.443078188700606	-2.7967532745866	0.0051618935031101	0.0686855202792029
ENSG00000176490	79.5934164329572	1.02899153400165	0.368031720389804	2.79593164663032	0.00517503442205246	0.0688071616935182
ENSG00000196611	618.641292397818	-1.59492145818069	0.570746920791453	-2.7944460146522	0.00519887203024409	0.0690707284018143
ENSG00000106462	352.394301159565	-0.738996877720524	0.264706411942455	-2.79176039710431	0.00524221584067342	0.0694906368215653
ENSG00000171056	60.8272354992664	-2.2123336053548	0.79259920784977	-2.79123872878527	0.0052506729362415	0.0694906368215653
ENSG00000139835	251.335506772382	-0.755037940420812	0.270485392632048	-2.79141854232373	0.00524775647406828	0.0694906368215653
ENSG00000257365	136.970419723848	-0.821225216760781	0.294206031033151	-2.79132692785705	0.00524924222001771	0.0694906368215653
ENSG00000088899	391.447875167635	0.823593517123159	0.295055366620993	2.7913185466004	0.0052493781609508	0.0694906368215653
ENSG00000185650	11823.5659861117	0.422142172922446	0.151281761744313	2.79043665313684	0.00526369993783229	0.0696094984092271
ENSG00000184205	584.785661973792	1.05043104726161	0.376540385841565	2.78969026101651	0.00527584876760518	0.069716573000497
ENSG00000138685	37.5378287302511	2.08832291812316	0.748681056758473	2.7893358584026	0.00528162615008522	0.0697268944236503
ENSG00000102886	350.557260797996	-1.41822628896579	0.508480608392249	-2.78914528019081	0.00528473527047021	0.0697268944236503
ENSG00000160293	1757.87308321926	0.804642438396775	0.28853477810131	2.78871907120413	0.00529169448882982	0.0697652135481356
ENSG00000197888	6.17164529784976	5.99582745962411	2.15148244294978	2.78683541168179	0.00532255046327498	0.0700647226999486
ENSG00000230825	5.406036939748	-4.18194917937758	1.50060881091809	-2.786835015862	0.00532255696418674	0.0700647226999486
ENSG00000120306	320.312948117421	0.823849356133995	0.295675339843457	2.78633096885988	0.00533084121197045	0.0700665569533625
ENSG00000185432	364.956189973313	-1.77275126983975	0.636174932596557	-2.78657831204421	0.00532677455729061	0.0700665569533625
ENSG00000157350	166.748774342767	0.847273190278267	0.304123108165941	2.78595465957149	0.00533703362091067	0.0700943995784489
ENSG00000198074	4129.55733946407	-1.22002683312882	0.438100695548495	-2.7848091672198	0.00535592343123046	0.0701283581691933
ENSG00000157110	1018.68717782419	0.651520152922185	0.23391382936965	2.78529984600697	0.00534782448364787	0.0701283581691933
ENSG00000283703	13.0887429700813	2.24308635242734	0.805326120417301	2.78531429138922	0.00534758622162869	0.0701283581691933
ENSG00000132376	589.581793178275	-0.641704884274165	0.230423111171563	-2.78489809902957	0.00535445473709274	0.0701283581691933
ENSG00000125744	180.317712197206	1.08209870417031	0.388642378150529	2.78430445315767	0.00536426559360056	0.0701841745535344
ENSG00000167566	482.075795706137	0.728044184871983	0.261518311049188	2.78391284323891	0.0053707463967608	0.0702155712433659
ENSG00000129173	61.9062846907041	-1.4944587508325	0.536913804610288	-2.78342396488992	0.00537884682967231	0.0702554079486578
ENSG00000234964	2950.92662321797	-0.568553956783225	0.204278009066822	-2.78323623468077	0.00538196034154786	0.0702554079486578
ENSG00000260643	24.2807364653672	1.48233152750962	0.53280528349114	2.78212617899888	0.00540040393553891	0.0704427215397627
ENSG00000197959	18.7448140572512	-2.43267383213228	0.874590319932406	-2.78150098016211	0.00541081672804902	0.0704781906916877
ENSG00000240990	30.4394628096732	5.14806445276457	1.85084237235309	2.78147103700653	0.00541131589094562	0.0704781906916877
ENSG00000165449	572.463299988342	1.2296887647273	0.442141834546097	2.78120880823165	0.00541568911319148	0.070481793640287
ENSG00000250899	24.2351590110232	-1.75620239884723	0.63157140972048	-2.78068698458736	0.00542440112557529	0.0704885357745641
ENSG00000189190	333.900451013896	0.686775641431936	0.246976342706104	2.78073451856554	0.00542360700717373	0.0704885357745641
ENSG00000254024	21.7871238055668	-2.04995228850739	0.737550421313742	-2.77940630127493	0.00544583619826167	0.0706921800674136
ENSG00000127080	553.329375356485	-0.571426511325819	0.20560383538125	-2.77925997959243	0.00544829007668645	0.0706921800674136
ENSG00000197353	516.677593699413	-2.57102799507275	0.925169233008267	-2.77898129698156	0.00545296646669619	0.0706995388541883
ENSG00000184206	17.8679812348942	2.43917442061637	0.877833458905205	2.77863004180588	0.00545886581072615	0.0707227306276682
ENSG00000152284	323.982350592308	0.943452758152746	0.339608187283199	2.77806246574969	0.00546841044885841	0.0707930788356727
ENSG00000187720	888.565437975472	0.918871925552189	0.330795962539319	2.77776040099936	0.00547349625782928	0.070805641440566
ENSG00000110328	580.338986867771	0.657067420014092	0.23658026303451	2.77735518418223	0.00548032552466084	0.0708407217519082
ENSG00000178209	31866.106807912	0.904544657077613	0.325908566312065	2.77545529813257	0.00551244767436835	0.0712024491272578
ENSG00000139289	7854.61655369168	0.733567840586617	0.264401068105873	2.77445112397533	0.00552949421036439	0.0713690531802846
ENSG00000074219	403.644440454698	0.994734053398286	0.358615333582066	2.77381907645243	0.0055402480252798	0.0714542483320382
ENSG00000225742	16.0728545101857	2.46468863423932	0.888971847200791	2.77251595987002	0.00556247916784878	0.0716872315227253
ENSG00000145730	3272.64333658494	0.722092678797732	0.260483649856275	2.77212285376129	0.00556920133648298	0.0717201414627168
ENSG00000162377	655.784563076588	-0.528234574065674	0.190586359467995	-2.77162843941295	0.00557766629692789	0.0717217852306759
ENSG00000264290	11.2804142427753	2.64010473303854	0.952544466386749	2.77163410864497	0.00557756916718607	0.0717217852306759
ENSG00000153551	435.646987423015	1.70891213942607	0.617106270364335	2.76923476797139	0.00561881318251498	0.0721969236782451
ENSG00000127423	62.6836601901705	-1.98548842580217	0.717365181513876	-2.7677513168567	0.00564445075323876	0.0722028068471918
ENSG00000145794	13.5923550687178	2.0330343307057	0.73440900921474	2.76825897449094	0.00563566536646149	0.0722028068471918
ENSG00000164691	92.3192941611813	1.60079794245091	0.578295723746585	2.76813034701324	0.00563789019147945	0.0722028068471918
ENSG00000198223	27.5931068418743	-3.20230784654828	1.15697212094811	-2.76783492753832	0.00564300295991994	0.0722028068471918
ENSG00000164970	399.513951144446	0.719107709751727	0.259791533780392	2.76801826174831	0.00563982953756954	0.0722028068471918
ENSG00000212743	7.89754608375268	3.48191556830434	1.25792219611804	2.76798960941269	0.00564032538882579	0.0722028068471918
ENSG00000135622	229.69378675725	0.97667655700798	0.353025806871699	2.76658685568258	0.00566464929466129	0.0724073485249981
ENSG00000080845	1366.91214043109	0.587464720544108	0.212368682447885	2.76624930650154	0.00567051654090798	0.0724285353276331
ENSG00000156413	769.672839245151	1.06964768486258	0.386958086073955	2.76424688708572	0.00570543524696314	0.0728204847359056
ENSG00000143416	153.44534658472	1.39932986338409	0.506481510690922	2.76284490913632	0.00572999859869056	0.073079781979593
ENSG00000197124	57.6875754130831	-1.38433797190594	0.501286197660421	-2.76157208869276	0.00575238159859586	0.0733109077065494
ENSG00000197937	201.611664131048	0.723571875875449	0.26216243252129	2.7600135874414	0.00577989575559843	0.073607036621074
ENSG00000127946	221.029174751363	1.06482963284103	0.385920787219401	2.7591922179503	0.00579444410874348	0.0737377299489138
ENSG00000145569	176.028623883664	1.31646738739025	0.477226997000035	2.75857693648072	0.00580536378729991	0.0738220871844013
ENSG00000196460	11.1118518316434	2.82898296760822	1.0258975218826	2.75756877004324	0.00582329628439034	0.0739408210870375
ENSG00000135111	631.527687725201	0.949868931068424	0.344455518487401	2.75759533550096	0.00582282311836686	0.0739408210870375
ENSG00000280027	9.68629876824584	-2.5396295702863	0.921254337087032	-2.75670840076206	0.00583863935514094	0.0740809661542772
ENSG00000040933	668.869244257189	0.798288868618595	0.289798789823695	2.75463147759951	0.00587582765732354	0.0744978738719613
ENSG00000116883	156.065769790343	1.95140424307231	0.708527177875358	2.75416992319749	0.00588412094956605	0.0745480861099293
ENSG00000167768	1350.79137565956	-6.00793280931265	2.18214838449599	-2.75321919077483	0.00590123713782429	0.0747099227051265
ENSG00000232537	6.31715521137908	4.42875818559903	1.60889241425822	2.75267516109268	0.00591105156496062	0.0747791486581967
ENSG00000142973	1473.6825427985	-1.4798264111268	0.537772680065688	-2.75176941109399	0.00592742415249284	0.0749311774751208
ENSG00000163734	102.538509575048	1.67124599712404	0.607454980068086	2.75122610228122	0.00593726475214917	0.0750004699417962
ENSG00000100600	2116.19214605081	0.762592848784786	0.277260939105747	2.75045179910443	0.00595131464603657	0.0751227941930001
ENSG00000164654	1185.80726047076	-0.537824207854269	0.195582801287591	-2.74985430371986	0.00596217679747005	0.0752047300589972
ENSG00000108604	2758.14020370516	-0.476815094531524	0.173537715127823	-2.7476165292387	0.00600301728521484	0.0756644046828727
ENSG00000165949	576.447252305859	2.45788195169696	0.894981622199917	2.74629320952462	0.00602728695444992	0.0759146940346346
ENSG00000068001	841.147385897978	0.741508473924469	0.270096230585701	2.74534921245111	0.00604465383359494	0.0760777389956116
ENSG00000100697	2422.96662413346	-0.515069580832943	0.187901920486873	-2.74116187582514	0.00612223371126066	0.0769978296799998
ENSG00000131016	67.304114843975	1.43111714312629	0.522209852648892	2.74050199525535	0.00613454095215602	0.077096257912231
ENSG00000147586	157.280911880284	-0.693680603434404	0.253182169595129	-2.73984777262826	0.00614676465921928	0.0771934934028231
ENSG00000001461	2888.33667598834	0.512021308247494	0.186930120789029	2.7391054265961	0.00616066145455096	0.0771989660054984
ENSG00000168907	736.339971530415	-0.999815900183571	0.364970414342525	-2.73944369431886	0.00615432554245482	0.0771989660054984
ENSG00000006327	1950.03896038096	0.707000637434545	0.258104842188898	2.73919943321759	0.00615890007761386	0.0771989660054984
ENSG00000070961	1378.61166583876	-0.618797485777592	0.225956500047593	-2.73856908585173	0.00617071940733565	0.0772687244564847
ENSG00000085871	1015.38537733825	-0.533935006380359	0.19499259911822	-2.73823216263015	0.00617704525955588	0.0772916826841155
ENSG00000106089	218.631801423699	1.23175697605924	0.450218179107344	2.73591123863871	0.00622078031719093	0.0777258717191503
ENSG00000203616	5.53437857656362	4.1566519470467	1.51927729309745	2.7359402828777	0.00622023129481821	0.0777258717191503
ENSG00000073282	6526.56396093702	-0.705560314480259	0.257999262870382	-2.73473771448227	0.00624299993587868	0.077946889620314
ENSG00000215845	438.865430699064	-0.793934149063555	0.290596586613795	-2.73208353310322	0.00629351821745186	0.0785206533221605
ENSG00000189227	54.4234041609078	-1.00485217208574	0.367866433141078	-2.73156798652617	0.0063033734287441	0.0785866230735814
ENSG00000156381	1289.74358229703	0.759200390434919	0.278033297686433	2.73060959515413	0.00632173100065657	0.078758422785153
ENSG00000135046	98948.0107784691	0.881616539124592	0.323237206164338	2.7274599653493	0.00638240019722053	0.0794567260442686
ENSG00000232229	37.6697082368915	1.50653362356352	0.552716364032592	2.72569028456462	0.00641671778522666	0.0798261963086223
ENSG00000146426	71.0440623866318	0.877579532943167	0.322059934759623	2.72489508388607	0.00643219228074101	0.0799608874206279
ENSG00000249863	95.6797288800466	-0.874315569808503	0.320942666398122	-2.72421108611322	0.00644552963484286	0.0800688356443837
ENSG00000137699	33348.2720696777	-0.555002054756779	0.203757159060106	-2.72384075885676	0.00645276106743809	0.0801008327310767
ENSG00000139437	888.251804000857	-0.69298230635083	0.254505626444366	-2.72285652789807	0.0064720157748802	0.0802819260323099
ENSG00000182118	321.499195334178	-0.869798024078334	0.319502431301848	-2.72235181602295	0.0064819095887379	0.08034672512553
ENSG00000079482	112.326338488545	1.07847611960347	0.396205308958791	2.72201329769571	0.00648855314880781	0.0803711712924682
ENSG00000151388	35.1390584419032	2.08423925094345	0.766037479275377	2.72080584479366	0.00651229982069341	0.0805493302768009
ENSG00000213801	33.3689577408364	1.24872806672197	0.45892990636771	2.72095596603252	0.00650934317495503	0.0805493302768009
ENSG00000184110	746.575493546804	-0.711646562314936	0.26160845397189	-2.72027356727318	0.00652279279149204	0.0806211565931182
ENSG00000276168	3768.61069770539	-0.930352026183142	0.342149459047601	-2.71913925795133	0.00654520457169589	0.0808400894874571
ENSG00000174749	385.160009072294	-1.3101740087819	0.482221168455172	-2.71695664663402	0.00658852372473609	0.0812637400954528
ENSG00000276317	21.6477393343739	-2.05354366546362	0.755830949704616	-2.71693513776613	0.00658895189963131	0.0812637400954528
ENSG00000161513	535.021619955367	-0.603887368010827	0.222445005552845	-2.71477152975396	0.00663215069927655	0.0817379317915853
ENSG00000274012	3405.19779276499	-1.21375531464094	0.447139677684884	-2.71448805645094	0.00663782938126421	0.0817493589868653
ENSG00000232453	35.3631889548736	-1.33794292422326	0.493181974023716	-2.71287880476937	0.00667014966488971	0.0819391005852785
ENSG00000198892	21.1441364051419	1.84523619118609	0.680040025817621	2.71342291796361	0.00665920587425148	0.0819391005852785
ENSG00000101849	1292.0888343763	-0.535109170332737	0.197265775429506	-2.71263055726543	0.00667514805524791	0.0819391005852785
ENSG00000160606	394.695346848833	0.654007103500733	0.24110539047874	2.71253621581058	0.00667704847547576	0.0819391005852785
ENSG00000100243	2868.6965224347	0.495548989408194	0.182650941681442	2.71309298953669	0.00666583982195387	0.0819391005852785
ENSG00000065361	3647.25196654097	-0.648521199047986	0.239257116270303	-2.71056179710581	0.0067169330633037	0.0823698028183465
ENSG00000213699	1724.05800158385	0.551262395588329	0.203510710446156	2.70876355539125	0.00675344496325799	0.0826211424945083
ENSG00000163703	518.905533849071	0.831716464584227	0.307064312038571	2.70860673799094	0.00675663745944627	0.0826211424945083
ENSG00000170153	41.3340690359378	2.30738955189219	0.851828141889943	2.70875008516719	0.00675371913749194	0.0826211424945083
ENSG00000184809	36.7561129579984	6.2364471801263	2.30232524164924	2.70876028603974	0.00675351150703322	0.0826211424945083
ENSG00000242299	569.424146286514	-0.732359728163203	0.270434833905908	-2.70808208242143	0.00676732828540963	0.0826344096170849
ENSG00000169116	95.5613423767914	1.7157535849904	0.633553037280013	2.70814514970447	0.006766042369659	0.0826344096170849
ENSG00000165046	53.5555769960117	1.22162417983336	0.451441045729195	2.70605473602898	0.00680878223099381	0.0830816299888288
ENSG00000054356	17.4902077516404	2.68282575738555	0.991598063205222	2.70555768202454	0.0068189804568864	0.0831471004682711
ENSG00000163565	4965.45682902975	-0.587653237538093	0.21722376088084	-2.70528985942959	0.00682448115260666	0.0831552395400832
ENSG00000156711	3083.77414086903	-0.569854688439798	0.210710256676468	-2.70444684292124	0.00684182155151981	0.0832568484405997
ENSG00000107036	1031.50686874473	-0.56559783013307	0.209183431928037	-2.70383665149756	0.00685439755066908	0.0832568484405997
ENSG00000261762	10.9580358398417	2.23221313422033	0.825502513487237	2.70406582384663	0.00684967189248326	0.0832568484405997
ENSG00000262814	174.848463906863	-0.91079248452502	0.336872545687161	-2.70367085767457	0.00685781813522106	0.0832568484405997
ENSG00000267100	138.213492077994	-0.952641092474923	0.352376473467626	-2.70347530043729	0.00686185475668528	0.0832568484405997
ENSG00000267470	16.2681990897272	-2.3365633045169	0.864042706293936	-2.70422201066764	0.00684645291308437	0.0832568484405997
ENSG00000167468	2444.80376528872	0.556413560944504	0.205877328519102	2.7026461094422	0.00687899434273024	0.0834059884895517
ENSG00000238018	22.2694407236877	1.66615007080174	0.616669222493392	2.70185378161887	0.00689540788352974	0.0835461215747389
ENSG00000184261	39.6958989047317	-2.07278745840498	0.767331301965919	-2.70129402136268	0.00690702484859236	0.0835465863929385
ENSG00000144847	10.541056342957	2.54757963475325	0.943299931019041	2.70071008274232	0.00691916233324787	0.0835465863929385
ENSG00000082781	2864.32164358578	0.79881603590335	0.295694815307544	2.70148813760066	0.00690299427410064	0.0835465863929385
ENSG00000183943	1781.03383538561	0.857963159540746	0.317683772403504	2.70068298751819	0.00691972598720938	0.0835465863929385
ENSG00000118308	568.071659200746	-2.78685152351311	1.03180758900245	-2.70094109911271	0.00691435824246902	0.0835465863929385
ENSG00000135999	493.123983763802	-0.693461202518511	0.256914424986046	-2.69919138466505	0.00695081907034138	0.0838631431312927
ENSG00000188158	140.390457412598	0.87268464812086	0.323574169455961	2.69701580193543	0.00699639502261659	0.0843538727148693
ENSG00000173269	78.6712966611462	-1.24255942025229	0.460903556578228	-2.69592065957816	0.0070194383937443	0.0845724352691671
ENSG00000042980	263.100656348426	1.77723868352531	0.659389410893109	2.69527938144795	0.00703296342698861	0.0846760922052757
ENSG00000254842	32.4817523396525	1.34494387250168	0.499408328222497	2.69307457744774	0.00707964310977342	0.0851507871529329
ENSG00000198695	38993.1632357504	1.41656312195151	0.52602651941433	2.6929500123467	0.00708228866119425	0.0851507871529329
ENSG00000075420	3180.37861555508	1.00845410526641	0.374748720236826	2.69101414043285	0.00712351754106107	0.0855397214454172
ENSG00000212907	25174.435719512	1.34285585999101	0.499024028894552	2.69096432683959	0.00712458127470403	0.0855397214454172
ENSG00000139364	43.5107613708425	1.5734286337523	0.584943417074806	2.68988176945511	0.00714773376466637	0.0857578517580787
ENSG00000196312	1046.65189230497	0.444069065043228	0.165120816619696	2.68935845966655	0.00715894990852963	0.0857727946909834
ENSG00000137801	6451.78790742157	1.5397614496765	0.572510057646214	2.68949240124618	0.0071560776237285	0.0857727946909834
ENSG00000166855	1959.9605332713	-0.540665850286163	0.201101941670694	-2.68851631065556	0.00717703293387588	0.0859296114316872
ENSG00000180185	812.228461243177	-0.539238936282173	0.200656973869537	-2.68736703182205	0.00720177695030412	0.0861375036274779
ENSG00000167895	43.4168006646822	1.96976020181678	0.7330035893193	2.68724496103216	0.00720440963208025	0.0861375036274779
ENSG00000204175	85.2759661383808	-1.14267188844239	0.425322178643693	-2.68660311128436	0.00721826652239662	0.0862432468873846
ENSG00000105767	763.983110580279	-0.791623614271284	0.294708701752773	-2.68612229487328	0.00722866253091831	0.0863075217518734
ENSG00000162366	2251.83291082871	-0.883918925129573	0.329375736849861	-2.68361881656295	0.00728300911092198	0.086896096916375
ENSG00000254988	16.8464097790961	2.28871628075132	0.85293447932046	2.68334360521427	0.00728900582883749	0.0869073771899855
ENSG00000162891	5.76583949517247	-4.07507281977738	1.51953305258545	-2.68179281315647	0.0073228797101345	0.087034107103826
ENSG00000116984	725.776461038498	0.570492639243166	0.212684487734079	2.68234249390326	0.00731085693323617	0.087034107103826
ENSG00000114268	521.086672014846	0.907145614298437	0.33823785109615	2.68197545413261	0.00731888296725356	0.087034107103826
ENSG00000041880	238.759513917148	0.946549241607952	0.352966218619803	2.68169924393679	0.00732492804919152	0.087034107103826
ENSG00000170775	40.376788023484	-1.68692203556561	0.628852032805456	-2.68254207279868	0.00730649607020896	0.087034107103826
ENSG00000171860	6.34771137872432	3.70442609308991	1.38166915157908	2.68112383406418	0.00733753574518702	0.0871237422332248
ENSG00000204767	11.7772314314007	2.93077945403709	1.09346501033445	2.68026816252737	0.00735632020462324	0.087286544221064
ENSG00000131386	20.9028274424688	2.08630432045848	0.778640680505899	2.67941859793783	0.00737501326837354	0.0874197404674795
ENSG00000065154	2289.20413079306	0.585861724192152	0.218675848288849	2.67913319544226	0.00738130256633194	0.0874197404674795
ENSG00000037965	18.5766741947206	-1.87553665798206	0.7000711488842	-2.67906577920168	0.00738278889272001	0.0874197404674795
ENSG00000164850	11.6949081718159	2.14958262741455	0.802452314609857	2.67876681053585	0.00738938349306246	0.0874376499299447
ENSG00000205363	406.362121575034	-1.43385540757875	0.535587540346011	-2.67716348788178	0.00742483954840273	0.087796814041422
ENSG00000183617	382.923765232187	-0.472579344049211	0.176570984866683	-2.67642695885751	0.00744117832306069	0.0879295831375406
ENSG00000240288	14.3938894163558	2.75923392874281	1.03138822633226	2.67526219351464	0.00746708269670201	0.0880563942206848
ENSG00000204291	62.0272072521797	1.40211889859618	0.524097301099711	2.67530265020278	0.00746618158621098	0.0880563942206848
ENSG00000075275	4504.81162451696	0.634141113429694	0.237039586468187	2.67525404882025	0.00746726411903395	0.0880563942206848
ENSG00000156966	487.863243974026	0.979006198074457	0.365981548973298	2.6750151771883	0.00747258672148334	0.0880588044815896
ENSG00000227925	9.05351500009125	4.5587583136091	1.70473440583253	2.67417510787129	0.00749133240753614	0.0882192841010673
ENSG00000181804	220.316248329048	-0.718726438816283	0.268820546351018	-2.67362911270104	0.00750353859028485	0.0882348490484256
ENSG00000177054	632.833098472889	-0.721368385581634	0.269842682591975	-2.67329237410674	0.00751107555428114	0.0882348490484256
ENSG00000203585	28.0529424651393	-2.78986720271888	1.04364368684824	-2.6731989450769	0.00751316790793045	0.0882348490484256
ENSG00000141696	373.081389854369	0.650586017452432	0.243315334841818	2.67383894186277	0.00749884557394588	0.0882348490484256
ENSG00000111319	4610.00395893716	1.02185818261882	0.382592233802082	2.67088061998519	0.00756525473009737	0.088761795256836
ENSG00000130309	2179.76165856631	0.484958864263216	0.18158199874674	2.6707430671011	0.00756835534099264	0.088761795256836
ENSG00000261600	29.1065032039081	2.3097138523389	0.865033928471219	2.67008469415862	0.00758321165801955	0.0888754472590097
ENSG00000264175	9.22813616265407	4.35062358569955	1.62968558063862	2.66960917945577	0.00759395799740636	0.0889408082677852
ENSG00000115380	1792.4289488954	1.37368912799061	0.514662221197236	2.66910814785483	0.00760529577215351	0.0890130025577559
ENSG00000178802	703.562987247521	-0.475087681474248	0.178020674572553	-2.66872194825115	0.00761404538332937	0.0890548272061059
ENSG00000151726	5922.98633294717	-0.652868802918909	0.244695583239566	-2.66808576712121	0.00762847817035204	0.0891630210060508
ENSG00000177425	1659.70439200822	-0.459882518465069	0.172417567732885	-2.66726021316769	0.00764724374113778	0.0892610777247459
ENSG00000105639	21.0766370213838	1.56910378658367	0.588251647009328	2.6674022836332	0.0076440114092331	0.0892610777247459
ENSG00000116014	5.33187838013829	4.51929835724273	1.69490404319409	2.66640366774156	0.0076667575017314	0.0894281781812127
ENSG00000078401	288.121066466466	0.717197449532947	0.269191625964925	2.66426359647011	0.00771570765689646	0.089755747286615
ENSG00000260912	168.208981537822	0.713969544330165	0.267972954450939	2.66433433848968	0.00771408509894376	0.089755747286615
ENSG00000179846	90.3968345321598	-1.32984737058748	0.499136760667476	-2.66429458894016	0.00771499676764148	0.089755747286615
ENSG00000226054	52.3949419899597	-1.17097905440989	0.43943774738044	-2.66472113829611	0.00770521876045217	0.089755747286615
ENSG00000225518	7.03924744684291	-2.86343542882924	1.07518040176621	-2.66321393519213	0.0077398189330098	0.0899470291197633
ENSG00000105290	15.8417163010337	1.98194173069189	0.744225572177392	2.66309275680127	0.00774260680769366	0.0899470291197633
ENSG00000241886	5.27197465395163	4.08058058290649	1.53250904188979	2.66267961321427	0.00775211850631016	0.0899967603920826
ENSG00000124299	920.82286659686	-0.582062638592876	0.218756220256039	-2.66078211587132	0.00779593871390292	0.0904444541960214
ENSG00000171951	17.0163776368272	1.97872709798286	0.74396387626841	2.65970857067389	0.0078208290100682	0.0906110189348305
ENSG00000275832	626.948891248529	-0.812398537535864	0.305426896532548	-2.65987883437532	0.00781687667798776	0.0906110189348305
ENSG00000102755	46.6367246103146	1.81219695982604	0.681599768300547	2.65874057490431	0.00784333314207588	0.0908105967088934
ENSG00000182179	893.183870375348	1.37860133656681	0.518689230288352	2.65785610354857	0.007863946183273	0.0909767817094203
ENSG00000088808	794.092848245625	-0.534516360741721	0.201131417324994	-2.65754782545003	0.00787114215292126	0.0909767817094203
ENSG00000105281	3755.94640174353	-0.845583813094329	0.318194318069492	-2.65744472819171	0.00787355001251537	0.0909767817094203
ENSG00000283633	163.04992608821	1.08886082383917	0.409798386248561	2.65706469419509	0.00788243149151599	0.0910182777258608
ENSG00000133328	136.67704528674	-1.57509754909266	0.592874357762379	-2.65671390315712	0.00789063751961703	0.0910519238933675
ENSG00000172382	1875.01601110202	-2.29379034067043	0.86360374036417	-2.65606809403485	0.00790576489690534	0.0911042766585776
ENSG00000167565	605.694372419538	0.466318665525827	0.175560045694385	2.6561776267568	0.00790319738407298	0.0911042766585776
ENSG00000088002	1161.67152943278	-1.40894058238106	0.530690302630133	-2.65492053538244	0.00793270931096959	0.091353590157451
ENSG00000103089	98.7203155526227	1.39956021690314	0.527361259071645	2.65389274018136	0.00795691149357853	0.0915710115364674
ENSG00000153157	5.06955448528434	-4.39242606413129	1.65560609637759	-2.65306226749332	0.0079765154701432	0.0917352598020146
ENSG00000106278	1389.21702749114	-0.812056371328318	0.306145437382254	-2.65251828762152	0.00798937998634479	0.0918218321075899
ENSG00000165078	23.5628187869707	2.29543704369115	0.865739206846757	2.65141860913486	0.0080154429100565	0.0920598766805888
ENSG00000163735	125.579488375728	3.11108896377663	1.17387133305136	2.65028106248209	0.00804248340918018	0.0921244521004961
ENSG00000278053	193.304162479066	0.604257169167758	0.227993903079184	2.65032161389814	0.00804151806371133	0.0921244521004961
ENSG00000125772	3851.73374025462	0.882890629616631	0.33309933904539	2.65053251725703	0.00803649908305086	0.0921244521004961
ENSG00000166897	169.662607725279	1.81657215230037	0.685374010051883	2.6504829854328	0.00803767756644749	0.0921244521004961
ENSG00000272068	5.23448071383552	4.03948175888374	1.52446160437346	2.64977599127131	0.00805451556292976	0.0922008917233576
ENSG00000143819	1028.65489042804	0.967782111517169	0.365303024547097	2.64925841420838	0.00806686235698451	0.092280829023882
ENSG00000188706	1470.12687111874	0.566821341965621	0.213983061003097	2.64890753178551	0.00807524228705041	0.0923153113280414
ENSG00000185761	241.847221615699	0.765620525175072	0.289267532999541	2.64675581540735	0.00812680117651614	0.0928430373452591
ENSG00000065802	659.928982813063	0.646637812570842	0.244376492292021	2.64607207717072	0.00814324632528625	0.0928459595934725
ENSG00000225697	798.714557167325	1.15268128425515	0.435590403947322	2.64625040820354	0.00813895427065963	0.0928459595934725
ENSG00000177707	62.6817609809525	1.83851961103759	0.694781406975748	2.64618424237966	0.00814054650719874	0.0928459595934725
ENSG00000143797	4614.92193219798	0.530863485837676	0.200718672217072	2.64481365870915	0.00817359145645	0.0931302258332598
ENSG00000142102	752.394788667435	1.51642327416607	0.57384316738022	2.64257441817951	0.00822783819394487	0.0936090976876266
ENSG00000166268	6.41746445080428	-2.83020033774129	1.07111333249531	-2.64229774000473	0.00823456317734586	0.0936090976876266
ENSG00000100285	170.011870469714	-1.72245366192653	0.651834746501139	-2.64246984557384	0.00823037937425607	0.0936090976876266
ENSG00000188677	162.650658341752	0.984782264914885	0.372715559933189	2.64218178895298	0.00823738296420033	0.0936090976876266
ENSG00000234795	6.26371422897482	-4.97935427030256	1.88475784257283	-2.64190664595161	0.00824407756138162	0.0936233362663833
ENSG00000119943	118.893223259788	1.567739040161	0.593486287426696	2.64157584324076	0.0082521328788695	0.0936529988000988
ENSG00000146733	497.71213789081	-1.05718938589174	0.400360973783464	-2.64059050486655	0.00827616842521288	0.0937865484510737
ENSG00000011347	369.243777326791	0.661125242396915	0.250348155416335	2.64082330184318	0.00827048411994727	0.0937865484510737
ENSG00000273145	17.9251096179256	1.86311793456167	0.705613357486873	2.64042327826303	0.00828025382721191	0.0937865484510737
ENSG00000169087	98.6407484633557	-0.815937027157016	0.30930110493306	-2.63800230307488	0.00833960154905931	0.0943966083233983
ENSG00000161533	1853.79252600793	-0.715154495869705	0.271277035012757	-2.63625151991238	0.00838275699945959	0.0947686696645642
ENSG00000185262	2074.13015669671	-0.618791330534749	0.234726570261012	-2.63622192343484	0.00838348824350286	0.0947686696645642
ENSG00000121653	70.5907256815644	1.17591319177663	0.446400561224987	2.63421082749035	0.00843331051360252	0.0952692760252996
ENSG00000189182	11.9914708873557	-3.92671597488776	1.49083098933715	-2.63391088793617	0.00844076377223304	0.0952909059719616
ENSG00000204381	194.997473114825	1.56398123605046	0.593897416422437	2.63341983447526	0.00845297877697786	0.0953037351624535
ENSG00000160255	17.237211569588	3.25940339695701	1.23769760360399	2.63344082388632	0.00845245634000401	0.0953037351624535
ENSG00000113916	1193.54842041479	-0.587792526886803	0.223274445519657	-2.63260099255315	0.00847338271548306	0.095431264623118
ENSG00000120896	664.584467801971	0.646122219103802	0.245438600296434	2.63252079470561	0.00847538345504936	0.095431264623118
ENSG00000245694	209.961037291448	-1.23479159085551	0.469172640918575	-2.63184909597022	0.00849215728440149	0.0955575971733993
ENSG00000169403	566.277361815521	1.30250135417628	0.494991011887738	2.63136364680433	0.00850429851607328	0.0955692070339913
ENSG00000135049	173.752781926431	-0.867142854330371	0.329528011032543	-2.6314693297643	0.00850165403209942	0.0955692070339913
ENSG00000185989	9.67862954941776	3.20849373559369	1.21961826475374	2.63073604939946	0.00852001792173955	0.0956833605375515
ENSG00000187997	9.43393547392728	2.25576375402292	0.858103266925706	2.62877889056938	0.00856920576673912	0.0961729844858099
ENSG00000066027	1573.0251547128	-0.65199058428103	0.248041569608634	-2.62855369488975	0.00857488170074323	0.0961739502355197
ENSG00000105339	441.014845289024	0.874076635761609	0.332630493164649	2.62777061551284	0.0085946449617122	0.0962700954207412
ENSG00000124217	384.91426205243	-0.480194970913771	0.182735686847261	-2.62781167268735	0.00859360775515692	0.0962700954207412
ENSG00000226944	7.46349483134393	2.81648872991905	1.07203122673748	2.6272450462945	0.00860793203879856	0.0963561943575336
ENSG00000117519	2406.29572092448	0.810272531365377	0.30852355096482	2.62629069590143	0.00863210621681272	0.0965474235815108
ENSG00000196154	700.950381452477	-1.296582552566	0.49372408839639	-2.626127796959	0.00863623858715171	0.0965474235815108
ENSG00000111348	1469.17993888085	-0.804858373612283	0.306525185327035	-2.62574957014892	0.00864584014863675	0.0965919998423995
ENSG00000140961	325.52502732264	0.995300146402965	0.379131234028478	2.62521274184496	0.00865948430574547	0.096681653134556
ENSG00000106025	35.6624349445105	2.08061920107242	0.793066486738091	2.62351169273346	0.00870284577742496	0.0971027636839147
ENSG00000185189	1405.30531562035	1.22673463876106	0.46784812365018	2.62207878315296	0.00873952256442078	0.0974487917827995
ENSG00000284713	6.26227260571328	4.3868763641731	1.67360311092039	2.62121666454154	0.00876165586519358	0.0975593332799999
ENSG00000151208	9.86336029815538	5.25134382197342	2.00334710910694	2.62128504745959	0.00875989843314428	0.0975593332799999
ENSG00000236088	105.009639237933	-0.881082811929136	0.336158959459168	-2.6210302808727	0.00876644750077767	0.0975593332799999
ENSG00000205268	533.409245934025	-0.726625273553741	0.277303450901476	-2.62032539152175	0.00878459029464485	0.0976980452613863
ENSG00000121897	318.726090162513	-0.499943137682819	0.190877813280159	-2.61917888250864	0.00881417138454516	0.0979637071518731
ENSG00000148798	102.446394619453	-1.25713491171922	0.480175708858993	-2.61807269406954	0.00884279648533593	0.0982184077018752
ENSG00000166546	115.857034643676	1.2279996372631	0.469325836462023	2.61651829466768	0.00888316038840405	0.098603080311285
ENSG00000108561	1801.61634281002	-0.514936867738324	0.196837571802877	-2.6160496851384	0.00889536126259817	0.0986748488220513
ENSG00000143179	960.191277694581	-0.507185721777901	0.193943349830663	-2.61512303577689	0.00891953188861752	0.0988792178760725
ENSG00000165125	12.8173731471733	1.74958680685476	0.669112144787787	2.61478859782114	0.00892826972924581	0.0989123507351411
ENSG00000238271	26.5976008689574	1.19696761998881	0.457909569861366	2.61398253884757	0.00894936101090111	0.0989548561648803
ENSG00000118898	45457.9765455746	-0.820889795928927	0.314001755455216	-2.61428409767603	0.00894146524003255	0.0989548561648803
ENSG00000167536	37.7761846003685	-1.35323215256521	0.517669975882517	-2.61408274694362	0.00894673655314639	0.0989548561648803
ENSG00000166783	32.6153655919924	-1.53491667109597	0.587252536356659	-2.61372506046318	0.00895610754288661	0.0989658511723598
ENSG00000171132	192.892765099427	-0.608210295578833	0.232882243396937	-2.61166453357359	0.00901026196463898	0.0995003575748483
ENSG00000164237	107.107930966338	1.27751120710769	0.48935655562716	2.61059383473555	0.00903851717705914	0.0996844154046811
ENSG00000171204	491.163752047028	-0.473718003317241	0.181446439945736	-2.61078698187142	0.00903341427855277	0.0996844154046811
ENSG00000137103	457.680869491109	0.848273259675821	0.325149407846025	2.60887222675651	0.00908411546285866	0.100123130389803
ENSG00000175745	6.44045584562558	4.02544265727906	1.54337914610154	2.60820075705119	0.00910195552020467	0.100132241285225
ENSG00000113758	2750.08467018559	0.867024557295733	0.33241013410973	2.60829760686394	0.00909938042061618	0.100132241285225
ENSG00000214274	10.6470765504973	2.13669497765421	0.81922709537206	2.60818396965229	0.00910240193955776	0.100132241285225
ENSG00000140905	93.1601507158272	1.00090958087009	0.383915635374672	2.60710814732326	0.00913105157014944	0.100383221894199
ENSG00000196683	1396.52310857665	-0.540708470722537	0.207431167678131	-2.60668865134843	0.00914224473139046	0.100442094893725
ENSG00000151575	56.3550555508946	-1.11530541010935	0.427947993132846	-2.60617044128334	0.00915608873121831	0.100529997843402
ENSG00000146674	3979.22600475276	2.59195147503777	0.994695040523568	2.6057750058485	0.00916666538703978	0.100581937489808
ENSG00000282978	10.2075794069628	-1.99555926313913	0.765928415595189	-2.6054122324061	0.00917637802712589	0.10062433649248
ENSG00000079150	49.6015479865541	1.29602692349533	0.497624223065342	2.6044289313568	0.0092027504424655	0.100849249275553
ENSG00000161405	7.44363400043081	-3.12504293302191	1.20012901089337	-2.60392249887838	0.00921635948053841	0.100934096029703
ENSG00000266680	64.429296714356	-0.996096430337807	0.382629388491735	-2.60329305666839	0.00923329911412216	0.101055287060097
ENSG00000019169	117.452229585362	-1.57032301243834	0.603327064976488	-2.60277236609555	0.00924733300273106	0.101080282282076
ENSG00000211459	22342.3235812801	1.15519158122842	0.443826998882414	2.60279700004117	0.00924666862871481	0.101080282282076
ENSG00000260581	176.351234780598	-1.54812074410434	0.59486547177325	-2.60247201689066	0.00925543680483623	0.101104628715687
ENSG00000131019	216.762371564472	0.774752411507194	0.297779245899261	2.60176765901709	0.00927446613556183	0.101248216917729
ENSG00000102781	232.48532313502	1.03710976800833	0.398755084834655	2.6008690734022	0.00929879350931745	0.101449424431076
ENSG00000256087	356.721822200273	0.772207885983451	0.296949399332456	2.60046960094676	0.00930962668231439	0.101503249093295
ENSG00000017483	1559.39011605899	0.793419902258092	0.305153036389007	2.60007212003175	0.00932041702277057	0.101556538870657
ENSG00000205413	13156.4464654321	0.71356363668289	0.274486612168184	2.59963001855141	0.00933243177626212	0.101623094120626
ENSG00000179889	269.736068506597	1.36478737837024	0.525144681654566	2.59887879673506	0.00935287901839464	0.101716993370088
ENSG00000062038	16661.917633417	0.803127586154917	0.309012158677894	2.59901613448187	0.00934913788772265	0.101716993370088
ENSG00000227110	5.21051336177829	4.20402622235998	1.61826408923155	2.59786165332032	0.00938062797905174	0.101954329993421
ENSG00000204624	9.5196624303338	4.48542714587342	1.72719933747869	2.59693658313991	0.00940592881326145	0.102164776030406
ENSG00000203697	24.7302033113003	2.39485676328991	0.922645655890391	2.59564085952236	0.00944146942668944	0.102486108193181
ENSG00000136943	2903.75288904558	0.850595543590417	0.327906426359853	2.59401913232695	0.009486120794996	0.102790299663121
ENSG00000130653	64.4814175939127	1.2473194630631	0.480853060149867	2.59397218492142	0.00948741620837172	0.102790299663121
ENSG00000161281	7.16608059852435	-3.92711710318537	1.51387492582805	-2.59408292996025	0.00948436068841211	0.102790299663121
ENSG00000085998	1359.94946720695	0.589783476826952	0.227437898688962	2.59316270606916	0.00950977687373877	0.102838284797408
ENSG00000266208	136.891057921598	-0.837881842163905	0.323109346335096	-2.59318355122708	0.00950920046779471	0.102838284797408
ENSG00000175170	6.66549546409849	3.43257277782387	1.32363743718179	2.59328777005	0.00950631909798523	0.102838284797408
ENSG00000095015	977.601895187016	-0.859576569961875	0.331517554225773	-2.59285385948666	0.00951832068634893	0.102866022241604
ENSG00000074966	11.424277756274	-2.62451096170279	1.01277917165102	-2.59139507917046	0.00955876841491901	0.103173532358019
ENSG00000213261	121.734048691146	-0.959234280677477	0.370154060875533	-2.59144605467405	0.00955735243251854	0.103173532358019
ENSG00000255874	34.02615125502	2.27300151089664	0.877289542779863	2.59093651531989	0.00957151467809874	0.103246338580996
ENSG00000198121	379.040433993674	0.81496046817554	0.314579411556141	2.59063510909422	0.00957990083240001	0.103272051266568
ENSG00000137710	3951.99416438511	0.495914675433888	0.191649626458048	2.58761096798925	0.00966440612479555	0.104052632901819
ENSG00000124191	23.8490842647187	1.69044425750687	0.653274480007319	2.58764777936516	0.00966337350126036	0.104052632901819
ENSG00000006125	4416.87024843387	0.829467005189202	0.320596466205293	2.58726184666694	0.00967420448049161	0.104092988171894
ENSG00000067840	29.9340627856283	1.87466196991479	0.724805332895974	2.58643512241354	0.00969744244814744	0.104277810825235
ENSG00000205730	1027.5780958606	0.669415780262757	0.258841630408838	2.58619828350417	0.00970410879371865	0.104284317174222
ENSG00000230699	9.92108354426861	3.37877226107188	1.30721237664881	2.58471562955497	0.00974593421422586	0.104668413330684
ENSG00000254607	19.6511255163078	2.73452189807051	1.05816038180945	2.58422252909761	0.00975988005643978	0.104687491503146
ENSG00000108064	746.646736371081	-0.602792175574578	0.233256394673446	-2.58424716037678	0.0097591830140639	0.104687491503146
ENSG00000239605	5.48268220390846	4.05393267730443	1.56941737891773	2.58308129613042	0.0097922245845348	0.104968986901509
ENSG00000226950	291.86433438844	-0.857276177828872	0.331954206978888	-2.58251337023542	0.00980835616120567	0.10506035018971
ENSG00000107281	365.019466725832	1.6625609967935	0.643816708420738	2.58235142867248	0.00981296034611241	0.10506035018971
ENSG00000011198	1452.76319976494	-0.555297055516699	0.215088204389916	-2.58171784497325	0.00983099237252763	0.10518795010531
ENSG00000163803	65.2770018532886	-1.15142540669989	0.446075784738288	-2.58123270998767	0.0098448194467699	0.105270427956293
ENSG00000108582	4517.9839506204	0.815954214863187	0.31633162526746	2.57942661968525	0.00989644819021094	0.10569111800905
ENSG00000124256	6.0870502519954	3.15887476637255	1.22462283694955	2.57946746627809	0.00989527789207304	0.10569111800905
ENSG00000138758	1662.168798815	0.666838736887609	0.258559158347861	2.57905672786286	0.00990705159827263	0.105738723789256
ENSG00000160868	8.72002025442919	-4.15585507416852	1.61159105666006	-2.57872805696833	0.0099164818483581	0.105773757099195
ENSG00000231298	126.933732824135	1.52583109276741	0.591972663491676	2.57753640812988	0.00995073981988075	0.106073406816015
ENSG00000213062	14.7366071257822	-2.00729794163912	0.778898492410971	-2.57709824989623	0.00996336264249957	0.10614220078279
ENSG00000118257	859.744179530861	0.984446595907313	0.38211053422086	2.57633984866353	0.00998524500242469	0.106254735242791
ENSG00000185614	155.189979960131	-0.678430031149477	0.263390522807854	-2.57575718335317	0.0100020858727324	0.106254735242791
ENSG00000157404	13.8556047693274	3.41027111189278	1.3240361280274	2.57566318599895	0.0100048050620936	0.106254735242791
ENSG00000251611	7.47846910059242	-2.48602562017201	0.96510685736078	-2.57590711454522	0.0099977499714711	0.106254735242791
ENSG00000095321	832.108872167271	0.903403309901597	0.350661015133438	2.57628670115446	0.00998678008602234	0.106254735242791
ENSG00000117862	174.876693848103	-0.796360147796602	0.309219896855426	-2.57538455932199	0.0100128691439867	0.106274777064954
ENSG00000228253	5101.91336014841	1.36962951276976	0.532103564903455	2.57399048438674	0.0100533038117929	0.106638157880331
ENSG00000159200	1022.15212141547	0.620477852795456	0.241087632127228	2.57366106805518	0.0100628796349985	0.106673964337738
ENSG00000027697	3875.6286021245	-0.457164406014773	0.177660077954925	-2.57325343587186	0.0100747403636423	0.10673393347073
ENSG00000233369	767.157930109157	0.628845837723337	0.24441085046341	2.57290474842269	0.0100848958758065	0.106775774488155
ENSG00000158163	18.6040128220027	1.86379433204525	0.724660554283044	2.57195499469297	0.0101126036728572	0.107003287940657
ENSG00000144730	122.493674848742	-0.744461195191937	0.289628764793226	-2.57039799110917	0.010158173846187	0.107048751842596
ENSG00000114554	4696.16279577157	0.525825951399835	0.204537975162569	2.57079865478233	0.0101464298379765	0.107048751842596
ENSG00000164309	111.041880325562	0.97548217599764	0.379372239450986	2.57130615937878	0.0101315715290047	0.107048751842596
ENSG00000285976	291.878587429981	-0.482237387152019	0.18759088889886	-2.57068661480686	0.0101497126669239	0.107048751842596
ENSG00000107099	417.529404801371	1.1576449808758	0.450283446413383	2.57092502532953	0.0101427282504359	0.107048751842596
ENSG00000185306	29.2311638294825	1.40853761155359	0.548000823354307	2.57032024684187	0.0101604540400442	0.107048751842596
ENSG00000054983	436.579362641223	0.828862737348221	0.322381085238333	2.57106503855662	0.0101386284519523	0.107048751842596
ENSG00000116221	1208.04055205572	-0.461366425370847	0.179618365309387	-2.5685927192142	0.0102112391186524	0.107124615266107
ENSG00000235885	14.2746672660827	2.39147887140972	0.93098208020983	2.56877003569254	0.0102060160620087	0.107124615266107
ENSG00000232316	7.83544552759174	-3.04139663007095	1.18387484694583	-2.56901870828421	0.0101986951372516	0.107124615266107
ENSG00000130985	7979.50694032444	0.433577110262925	0.168745800256443	2.56940978444511	0.0101871913065187	0.107124615266107
ENSG00000068438	1038.3188833555	0.651137281650506	0.253375859074375	2.56984735652884	0.0101743334548191	0.107124615266107
ENSG00000005022	4691.35684065185	-0.625923121037633	0.243668002205874	-2.56875385923177	0.0102064924592763	0.107124615266107
ENSG00000264859	14.2912560619355	1.68819234891817	0.657098048502047	2.56916354076329	0.0101944334216312	0.107124615266107
ENSG00000110492	3409.11185907988	0.812682341235073	0.316427725560997	2.56830320350172	0.0102197722447055	0.107148800408384
ENSG00000115598	59.6382978849815	-1.5994612417985	0.623067048164554	-2.56707724555524	0.0102559762685127	0.10746289384882
ENSG00000173083	210.086021257155	-1.47409534694299	0.574432595236464	-2.56617636110323	0.0102826532017349	0.107676840131375
ENSG00000228918	21.9958818908205	2.32981622726878	0.908410334881338	2.5647178789232	0.010325972631143	0.107999002503839
ENSG00000261553	35.638624803981	1.55332372905042	0.605643025443948	2.56475128713289	0.0103249785350701	0.107999002503839
ENSG00000261934	31.7010822989636	-1.68349511166419	0.656992255381515	-2.56242763575132	0.0103943246092445	0.108647846234539
ENSG00000203879	2266.39942224955	0.49370142600372	0.192740138420609	2.56148734793547	0.0104225037431825	0.108685333042042
ENSG00000198894	687.207395980366	-0.451994882456187	0.176429858108941	-2.56189562980372	0.0104102597577252	0.108685333042042
ENSG00000186417	10.2609877064297	4.3831877197229	1.71112670045565	2.56157987515227	0.0104197278175169	0.108685333042042
ENSG00000198736	557.500712009308	-0.628862091799372	0.245508774274542	-2.5614648342309	0.0104231792804051	0.108685333042042
ENSG00000164597	81.2452619993419	-1.52151861572606	0.594373318000885	-2.55987031995907	0.0104711228388318	0.108921202201996
ENSG00000165895	131.117285972064	1.10188159743699	0.430340478237287	2.56048792330759	0.010452529626444	0.108921202201996
ENSG00000110799	191.545793884316	-1.76667930630401	0.690138862574264	-2.55988961368467	0.0104705415480315	0.108921202201996
ENSG00000100284	1244.69626701446	-0.785960969539124	0.307008536136663	-2.56006226872225	0.010465340990456	0.108921202201996
ENSG00000169692	986.243383234509	0.510311085656714	0.199470217869591	2.55833222175726	0.0105175558909344	0.109338096135062
ENSG00000050393	675.7887884839	-0.711603293419649	0.278327670031025	-2.55671056111786	0.0105667098507802	0.109477228800437
ENSG00000124613	150.708462048569	0.738255124344347	0.288666099456621	2.55747081397511	0.0105436405336135	0.109477228800437
ENSG00000082269	1712.53631220528	-0.61053160445956	0.238769132261574	-2.5569955323652	0.0105580573515861	0.109477228800437
ENSG00000131203	5.75754542884135	5.35096667567848	2.09275505668135	2.55690060745281	0.010560938828893	0.109477228800437
ENSG00000254285	13.6309952108731	3.70090993364122	1.44757281193254	2.55663128178018	0.0105691181073831	0.109477228800437
ENSG00000210135	4486.39430197084	1.39695057088828	0.546366507900066	2.55680125097233	0.0105639555771288	0.109477228800437
ENSG00000105855	6352.67359999852	0.947314804376696	0.370637734565877	2.55590490667733	0.0105912058326452	0.109640009837943
ENSG00000204262	2148.03193310643	0.953204067347483	0.373130887939578	2.55461045482206	0.0106306695117528	0.109982362567473
ENSG00000168434	508.686716245967	0.50375707690477	0.197374979423204	2.55228437959521	0.0107019128067825	0.110652890529263
ENSG00000058085	59265.531485321	1.36944756813508	0.536660283673833	2.55179600539881	0.0107169245989687	0.110741554189343
ENSG00000259430	45.1735875503392	-1.08128468394826	0.423811116357436	-2.55133629632386	0.0107310723776543	0.110821188629977
ENSG00000167693	4124.25472480823	0.505234760143663	0.198116285550174	2.55019297752638	0.0107663306214553	0.111118607283826
ENSG00000112769	76.3856056676703	1.35329805946926	0.530922635237903	2.54895528962117	0.0108046151244454	0.111446884422113
ENSG00000129480	325.081064815372	-0.556832575283292	0.218553178704957	-2.54781275011793	0.0108400638424252	0.111700368279833
ENSG00000268230	11.6668736026843	1.98669416817687	0.779785381679571	2.54774482165561	0.0108421746601175	0.111700368279833
ENSG00000187372	59.8739816958912	1.84066799957709	0.722619735986084	2.54721523356309	0.0108586436792304	0.111803090664967
ENSG00000111640	37560.6856898905	0.664069869865961	0.260756327869233	2.54670663332468	0.0108744809493405	0.111899189433854
ENSG00000163683	2145.78222349447	0.802461207473343	0.315197301091204	2.54590126468484	0.0108996012674592	0.11202367969333
ENSG00000123388	56.2636779355496	-1.88485213853095	0.740341113167357	-2.54592390589671	0.01089889435965	0.11202367969333
ENSG00000100302	73.7543774617413	2.02920350336395	0.797151215389893	2.54556910180642	0.010909976799099	0.112063373628954
ENSG00000110080	831.739649115288	0.68846898898215	0.270593276760945	2.54429451176045	0.0109498717567323	0.112406052252136
ENSG00000272168	126.137935107693	1.6454295533474	0.647427756699039	2.54148750392902	0.0110381891854977	0.113245107296654
ENSG00000232973	10.502870064752	2.26307975712208	0.890649709438773	2.54093133713379	0.01105576290013	0.11335780732821
ENSG00000124374	274.941041298307	-0.980542030390144	0.386042744879904	-2.53998305471376	0.0110857839812492	0.113597923405237
ENSG00000186281	7.32343076712094	3.02658953272462	1.19233523174822	2.53837130039929	0.0111369756791511	0.114054563428449
ENSG00000130193	650.957093818679	0.688795332264528	0.271438946842837	2.53757001445831	0.0111625037618193	0.1142479935884
ENSG00000227398	95.2902749997168	1.13969690495662	0.449169142027286	2.5373446176928	0.0111696940129215	0.114253618009699
ENSG00000129422	1875.70946647533	0.807874576377237	0.31851329378824	2.53639201921143	0.0112001277545368	0.114496849683188
ENSG00000151012	927.386946120628	-1.49477206083218	0.589669145966391	-2.53493348101578	0.0112468680343064	0.11490639223886
ENSG00000197568	97.8119599947846	0.795401039453726	0.31385643606275	2.53428302899196	0.0112677681936339	0.115051603425206
ENSG00000185518	40.4137166806577	-1.44875544466242	0.571824458447346	-2.53356676731907	0.011290822824018	0.115218627928369
ENSG00000196352	4598.60574379875	-0.702539642162512	0.277315764974219	-2.53335630676397	0.0112976049676804	0.115219498203285
ENSG00000160712	297.301407889891	-1.15536923497875	0.456340574712624	-2.53181351604847	0.0113474323274387	0.115587598573847
ENSG00000186591	9246.75222422726	0.520173789731597	0.205471115760402	2.53161515090115	0.0113538530421274	0.115587598573847
ENSG00000188130	251.599144130066	1.30392363120579	0.515031891730364	2.53173376667019	0.0113500132804348	0.115587598573847
ENSG00000166454	2561.04479640809	0.533051055833397	0.21064695238036	2.53054245413852	0.0113886301743212	0.115736197371055
ENSG00000167721	1635.6306895881	-0.43853917561599	0.173272366065809	-2.53092391806684	0.0113762521861891	0.115736197371055
ENSG00000130540	49.4899457035735	1.70820242978221	0.674982565870025	2.53073563104612	0.01138236035171	0.115736197371055
ENSG00000149809	819.053698718572	-1.28812216113165	0.509209486278379	-2.5296507544391	0.0114176112724508	0.115896229278168
ENSG00000053747	30333.7283101903	1.23629589969256	0.488723387089157	2.52964341865437	0.0114178499637602	0.115896229278168
ENSG00000182752	886.232322989132	0.9292300076903	0.36745484131444	2.52882777205032	0.011444417064246	0.116097403060349
ENSG00000164418	6.11102604567082	3.61765698943863	1.43143431163013	2.52729514728399	0.0114944859053802	0.116536611668867
ENSG00000185515	855.487285383512	-0.457259587145216	0.181002667389304	-2.52625883220678	0.0115284510355638	0.116812131959291
ENSG00000176920	1666.5096966446	-0.598363552032611	0.236901772052951	-2.52578757367365	0.011543925928999	0.116900085702429
ENSG00000169019	470.950608963326	-0.466650634198623	0.184830064433454	-2.5247550263482	0.0115778965300793	0.117171750325442
ENSG00000253807	8.42174727880517	3.19036024094078	1.26372999150115	2.52455845979492	0.011584373571844	0.117171750325442
ENSG00000173597	219.451740395064	1.02090874244689	0.404654561358857	2.52291420864899	0.0116386791548241	0.117606896359501
ENSG00000210164	15.9833548766328	2.58895047747064	1.0262039340857	2.52284208964495	0.0116410662307603	0.117606896359501
ENSG00000071575	380.054456080112	0.784485103078137	0.311111049567955	2.52155975870212	0.0116835828488614	0.117967161334895
ENSG00000246228	66.3802299182439	1.03932082699796	0.4123386886892	2.52055132226835	0.011717114998862	0.118236342261244
ENSG00000179674	48.8147387136673	1.28185982751056	0.508782388055851	2.51946580228293	0.0117533056827115	0.118462580123639
ENSG00000196159	36.1923793154487	2.04619850301164	0.812126391676033	2.519556714305	0.0117502709225193	0.118462580123639
ENSG00000068971	761.188811600981	0.610694678077933	0.242416999154814	2.51919081668001	0.0117624892878304	0.118485730794568
ENSG00000142920	86.3693767329726	1.32375310973379	0.525687017408029	2.5181392461635	0.0117976669814937	0.11860645970362
ENSG00000218416	41.1829080167127	1.48584201653855	0.589978623875779	2.51846754510786	0.0117866745467662	0.11860645970362
ENSG00000104415	22.709985200298	1.5625023952505	0.620531040067176	2.51800843851639	0.0118020493468525	0.11860645970362
ENSG00000125149	512.36690735242	-0.540695628117518	0.214710434552854	-2.51825501282015	0.0117937897287642	0.11860645970362
ENSG00000197355	86.6039031832788	1.34840347522361	0.535736164049192	2.51691703063711	0.0118386704028855	0.118905034606915
ENSG00000196204	202.019865894966	0.717260863457865	0.285068989002878	2.51609572113305	0.0118662950020529	0.119112955373582
ENSG00000253485	14.4398549254775	2.34994488650419	0.934187468056507	2.51549605069424	0.0118865008990648	0.119246208727935
ENSG00000270872	35.8384215656412	-1.53934773863696	0.612062247449227	-2.51501827641257	0.0119026213354136	0.119268841045888
ENSG00000163083	18.8806089548868	2.19896730972838	0.8743121021504	2.51508277687103	0.0119004439138576	0.119268841045888
ENSG00000168811	13.0719588801078	2.13146823544788	0.847826112894635	2.51403938028124	0.0119357105301403	0.119492613118743
ENSG00000013288	1091.24382548263	0.494647188955317	0.196761198264048	2.51394682142316	0.0119388434728927	0.119492613118743
ENSG00000087253	1241.14432225101	0.652162040009242	0.259495580669301	2.51319131650397	0.011964443165259	0.119679212010629
ENSG00000126106	144.843461276094	0.669501843436312	0.266568916471868	2.51155255570455	0.0120201386173868	0.119938968879986
ENSG00000117525	11931.9784852171	0.648845840860404	0.258380869560692	2.51119923066903	0.0120321769103611	0.119938968879986
ENSG00000224577	6.47863032149685	2.94656388965036	1.17337006461343	2.51119742910872	0.0120322383194918	0.119938968879986
ENSG00000145040	179.217370853412	1.20750287217246	0.480830450959306	2.51128619196926	0.0120292130225203	0.119938968879986
ENSG00000187098	221.196680820655	1.27701239365198	0.508474468483344	2.5114582399014	0.0120233510476017	0.119938968879986
ENSG00000258920	34.9737523473633	-1.5536960735511	0.618456163474383	-2.51221697722713	0.0119975297322593	0.119938968879986
ENSG00000074935	190.959838707315	-0.937517587143109	0.373528847827968	-2.50989339269156	0.0120767614821244	0.120313075448726
ENSG00000197375	444.409152050299	0.642685474157391	0.25608782926163	2.50962912220556	0.0120858021316763	0.120313639054415
ENSG00000165140	40.1228945417808	1.4037702009466	0.55938621934922	2.50948298758544	0.0120908039479851	0.120313639054415
ENSG00000233217	27.9638169440123	1.88017525570006	0.749461617703876	2.50870119467939	0.0121175939055821	0.120440903030353
ENSG00000101577	172.862947166025	1.18325935881047	0.471627398957621	2.50888595833423	0.0121112578050763	0.120440903030353
ENSG00000197872	299.999858029068	1.54364033289902	0.615490732875977	2.50798306204566	0.0121422487380167	0.120482823360189
ENSG00000109736	1559.42940150777	0.826719458615447	0.329588352631792	2.50833942405434	0.0121300086146344	0.120482823360189
ENSG00000259342	50.2946835532281	1.12040805986437	0.446739653728311	2.50796644200686	0.0121428198608874	0.120482823360189
ENSG00000253719	1714.13324636982	-0.460275735372545	0.183645598481572	-2.50632598427743	0.0121993090207099	0.120903866187393
ENSG00000140525	270.138341475512	-1.10057061614312	0.439093585403199	-2.50646024612843	0.0121946769804478	0.120903866187393
ENSG00000177283	121.940938317916	1.40041212111766	0.558853373524958	2.50586681133296	0.012215162294712	0.120991288014117
ENSG00000170458	589.211785706818	-0.890391073267175	0.355367439659994	-2.50555052010133	0.0122260930906275	0.121029880106011
ENSG00000153879	1522.10128871256	-0.770027546324204	0.307555314878834	-2.5037042413901	0.0122900722645503	0.121593268149274
ENSG00000130558	7.94697072012752	2.97635501562005	1.18897321252697	2.50329863134113	0.0123041675614714	0.121662760284549
ENSG00000087086	6907.65476288377	0.645977909840924	0.258134995410794	2.50248095502479	0.0123326260559755	0.121874113321688
ENSG00000123130	851.818630499322	0.769256569343211	0.307667462429238	2.50028574120065	0.012409317113458	0.12251610642129
ENSG00000165879	89.7861659192043	-0.844136940715734	0.337625881998159	-2.50021395196336	0.0124118322285561	0.12251610642129
ENSG00000112852	47.621070833759	2.23845478536187	0.895588542603357	2.49942320482906	0.0124395657144416	0.122719454195509
ENSG00000224853	14.2314575601194	1.65689822385703	0.663324377811298	2.49787024159149	0.0124941918041175	0.123187719191886
ENSG00000129673	13.74542472002	2.53169505497498	1.01383089998092	2.49715712454869	0.0125193470641755	0.123294428299451
ENSG00000205726	787.357277444174	0.556384739321134	0.222803349344752	2.49720096649094	0.0125177992433852	0.123294428299451
ENSG00000100266	1971.25965830695	0.45882675003912	0.183818867907914	2.49608081728028	0.0125573988121592	0.123598424807322
ENSG00000205609	609.66654000881	-0.55704147199975	0.223322806042433	-2.4943331219558	0.0126194049664812	0.124137714378679
ENSG00000122417	770.549130592609	0.476459468607621	0.191053253245862	2.49385687243167	0.0126363486599258	0.124233359253727
ENSG00000148730	3434.80309672849	-0.520507094784186	0.208852437947852	-2.49222417463066	0.0126945886782732	0.124663469297769
ENSG00000139173	582.395621878238	-0.597376887825268	0.239692844657036	-2.49225999499494	0.0126933083840553	0.124663469297769
ENSG00000154237	777.650645561425	-0.428015446118144	0.17180984144501	-2.49121611729754	0.0127306656424461	0.124946436040094
ENSG00000110427	691.607059318246	1.18254247412654	0.474934983818855	2.48990391193751	0.0127777635657623	0.125337184805554
ENSG00000143867	15.4168426561379	3.18073413750321	1.27830799846173	2.48823768710732	0.0128377901954304	0.125782562820262
ENSG00000184838	9.56589580153786	2.98654393096799	1.20025131841661	2.48826548668813	0.0128367866575773	0.125782562820262
ENSG00000172037	2755.65792965607	0.700881309797395	0.281796469982526	2.48718981412668	0.0128756680522323	0.1260219031757
ENSG00000184347	31.2332016739522	2.46930896552716	0.992824050660821	2.48715667583153	0.0128768675258867	0.1260219031757
ENSG00000233342	5.87236835173405	3.2887677751852	1.32296442207553	2.48590795058996	0.012922138497098	0.126393060172013
ENSG00000117114	2263.40857576201	-0.663949726968258	0.267234009013359	-2.48452556401632	0.0129724193617228	0.126812769953659
ENSG00000254101	5.04981343256168	-4.92791930507127	1.98391831152426	-2.48393256740754	0.0129940411252448	0.126879953212166
ENSG00000180739	508.624198085738	-1.20618857271531	0.485572894400206	-2.48405252151734	0.0129896648042263	0.126879953212166
ENSG00000158055	3157.27676028007	-0.64145775328562	0.258278334966652	-2.48359101962015	0.0130065090577948	0.126925199689919
ENSG00000119888	357.651047373068	0.890090654273795	0.358445054375069	2.48319970776448	0.0130208065941707	0.126925199689919
ENSG00000140323	33.3180870808814	2.30753446478003	0.929233328008343	2.48326700649647	0.013018346680907	0.126925199689919
ENSG00000114993	1322.69874040679	0.870377068459049	0.350554129316295	2.48286069303075	0.0130332045642113	0.126938119367256
ENSG00000115221	12922.9385936812	0.777591067277721	0.313196224502243	2.48276002852056	0.0130368879350155	0.126938119367256
ENSG00000170545	1210.45092634145	-0.873381422659737	0.351959347406034	-2.4814838108339	0.0130836653469627	0.127288479894956
ENSG00000128965	482.076930550612	-1.47500252464793	0.594429556193272	-2.48137480594647	0.0130876675928031	0.127288479894956
ENSG00000169251	1484.53843137435	0.500138994595926	0.201641387645017	2.48033898415936	0.0131257530991451	0.1275147273127
ENSG00000171368	369.229904146575	0.974251950690968	0.392764257137291	2.48050053686636	0.0131198066217646	0.1275147273127
ENSG00000280355	37.9851760444329	1.2419944855837	0.501009655294273	2.47898313427554	0.0131757536146093	0.127928239807761
ENSG00000177954	8326.71691457501	-0.476828203352826	0.192467902006602	-2.47744272360006	0.0132327645915594	0.128409314606757
ENSG00000279267	17.8354458066503	1.4695890491658	0.593375203153039	2.47666070532909	0.0132617906584583	0.128618437586682
ENSG00000130827	1889.40583334608	1.08025432289268	0.436286052899931	2.47602304889735	0.0132855001111928	0.128630855043935
ENSG00000225032	16.6003875970541	2.117351161432	0.855080412580469	2.47620122070419	0.0132788715266155	0.128630855043935
ENSG00000181392	46.4152298049202	1.1004598542697	0.444401077197681	2.47627629799867	0.0132760792768797	0.128630855043935
ENSG00000162520	56.7701883028348	1.14136031476411	0.461462288737145	2.47335555390149	0.013385090105873	0.129376671500868
ENSG00000138119	10818.04308294	0.715668187036477	0.289315247373895	2.47366218522035	0.0133736086670772	0.129376671500868
ENSG00000141012	470.35906793267	0.455188667001724	0.184034737082367	2.47338450456774	0.0133840057108872	0.129376671500868
ENSG00000149256	812.197606198228	0.906150653182028	0.366438600764775	2.47285807578909	0.0134037361050501	0.129484154793592
ENSG00000249565	127.587781818073	-0.633522293745495	0.256279789916766	-2.47199474430367	0.0134361491626895	0.129724436781186
ENSG00000105373	4544.26375623303	-0.458097621170581	0.185340191672968	-2.47165828974048	0.0134487998129601	0.129773752541772
ENSG00000091128	12.6580039633694	-2.35488016671938	0.952943009801027	-2.47116579113275	0.0134673366806265	0.129807018257803
ENSG00000138316	77.6383354903664	1.8227746680498	0.737564733881061	2.47134195050022	0.0134607037290558	0.129807018257803
ENSG00000235098	548.943720916961	-0.528915086626357	0.214065740459754	-2.47080679743705	0.0134808628579529	0.129864639121546
ENSG00000198246	80.1027786572638	1.03971113317441	0.420836003822927	2.47058503485809	0.013489224433302	0.129872471390577
ENSG00000095380	1201.55367647858	0.485099139833118	0.196369764876446	2.47033518697921	0.0134986504568718	0.129890537533825
ENSG00000141655	379.954274814805	-0.711145764513024	0.287901070773589	-2.47010461823632	0.0135073542987797	0.129901638183625
ENSG00000173258	9.58142685562688	2.84706799841357	1.15277137622	2.46975944852939	0.0135203935319414	0.129954397048632
ENSG00000133678	733.176117293468	-0.612385298149276	0.248105780213734	-2.46824276976429	0.0135778199301974	0.130433496314375
ENSG00000065989	43.03517128238	2.16427273070465	0.877265909417294	2.46706580920513	0.0136225318752012	0.130789989348681
ENSG00000134294	14682.5106533126	-0.683388009110657	0.277054417303736	-2.46662015268089	0.0136394959875338	0.130879826249592
ENSG00000102359	2213.47781654758	0.587536271161691	0.238364313238437	2.46486675450438	0.0137064211426929	0.131443253505027
ENSG00000211584	425.614688340955	-0.696387130561619	0.282546450482692	-2.46468192883661	0.013713492591777	0.131443253505027
ENSG00000188051	10.9812431685744	2.26106206037111	0.917480289125054	2.46442576169931	0.013723298900685	0.131464007564747
ENSG00000214900	71.957223372011	-0.982779347504056	0.39904161153237	-2.46284928463991	0.0137837843105568	0.131969954960005
ENSG00000097096	61.0427105626234	-0.926949439134467	0.376452814563171	-2.46232569733894	0.0138039250360724	0.132061775830289
ENSG00000173391	15.913036407003	-1.97644563553227	0.8027149892097	-2.46220098303902	0.0138087262260209	0.132061775830289
ENSG00000089327	1114.30185235307	1.05011066024391	0.426533183440476	2.46196708957923	0.0138177345178685	0.132074512433293
ENSG00000127589	148.861553905871	0.757890141783208	0.307904971135706	2.46144172011167	0.0138379877862065	0.132153356295094
ENSG00000136449	6.15702506069004	3.21189514634715	1.30499871292349	2.46122476178676	0.0138463592878795	0.132153356295094
ENSG00000267092	10.6760433331815	2.62614166241718	1.06712224120237	2.4609567311222	0.0138567076289654	0.132153356295094
ENSG00000160179	594.644249912408	-0.878990784537254	0.357155982046288	-2.46108375254187	0.013851802634001	0.132153356295094
ENSG00000162894	14.7245821715976	-1.92997617263166	0.784507234685844	-2.46011265071956	0.0138893411844599	0.132391199489547
ENSG00000178445	58.6215076870797	-3.50704631210769	1.42576170327949	-2.45977031367928	0.013902595833658	0.132444164627954
ENSG00000181634	272.308419021228	1.22023184595851	0.496291438952936	2.45870017128026	0.0139441017882503	0.132692627913079
ENSG00000278599	31.8663226703748	-1.55770295031319	0.633542641872568	-2.45871839929996	0.0139433938915312	0.132692627913079
ENSG00000153574	288.643011370533	-0.665644617330968	0.270870162601873	-2.45743056723947	0.0139934857967965	0.132948728088446
ENSG00000105202	34.2886577564464	-1.3505438570713	0.549519731162532	-2.45768037157495	0.0139837569324644	0.132948728088446
ENSG00000210140	1894.75898470815	1.28089494696737	0.521237291262369	2.45741233108094	0.0139941962550524	0.132948728088446
ENSG00000065618	57075.8008656755	0.868990785097672	0.353701191182733	2.45685003828196	0.014016118121206	0.133083505670722
ENSG00000237289	287.262516100459	-1.23955138509411	0.504694186111901	-2.4560445101289	0.0140475757125127	0.13330862665956
ENSG00000133134	39.3673623998887	-1.42949515589905	0.582116873622579	-2.45568410859341	0.0140616703260792	0.133361212515136
ENSG00000231205	19.9100090851762	-2.39611082375289	0.975811219952531	-2.45550653113975	0.0140686196288853	0.133361212515136
ENSG00000236740	122.579602706969	-0.979214130607764	0.39899415501345	-2.45420670529561	0.014119579274733	0.133474775880217
ENSG00000130348	549.205227205817	-0.450910589253518	0.183679169591391	-2.45488146672595	0.014093104970805	0.133474775880217
ENSG00000268104	22403.796428519	0.643804004266213	0.262368428061639	2.45381660065808	0.0141349050656062	0.133474775880217
ENSG00000085185	294.573989169296	0.758903518163963	0.309258275795657	2.45394732351612	0.0141297678059126	0.133474775880217
ENSG00000168795	760.464094059483	-0.421008978613971	0.171528146973998	-2.4544600174442	0.0141096354169374	0.133474775880217
ENSG00000104142	1668.61861833131	0.585858236867428	0.238732417671206	2.45403721280241	0.0141262362152443	0.133474775880217
ENSG00000153786	1898.80815799364	0.523144188606515	0.213152053651771	2.45432394219942	0.0141149763301885	0.133474775880217
ENSG00000111199	109.919913314541	1.16763150932337	0.475912765886575	2.45345700518917	0.014149045262659	0.13352639486626
ENSG00000072134	1219.91446588527	-0.468778019816871	0.191081919949862	-2.45328296858161	0.0141558933005555	0.13352639486626
ENSG00000160685	3444.69231114977	-0.712590592220326	0.290498706868761	-2.45299058264742	0.0141674047629315	0.133561752847253
ENSG00000102595	386.590624610394	0.667331458287969	0.272107312415926	2.45245690886811	0.0141884372148106	0.133686781095738
ENSG00000132432	1245.80154568581	0.41797421859326	0.170454302543657	2.4521189102059	0.0142017722208842	0.133739185035748
ENSG00000147130	1000.68663483133	0.545615605880334	0.222550064088586	2.45165333074517	0.0142201587576744	0.133839076272313
ENSG00000161638	4265.99785999566	0.961454147326395	0.392320368907029	2.45068628479557	0.0142584162011211	0.13412577951902
ENSG00000225630	2072.30631773063	1.42215620784593	0.580590991674021	2.44949754343487	0.0143055685627033	0.134422341409782
ENSG00000164626	88.459845651429	2.16979739678997	0.885752838297851	2.44966462761741	0.0142989327398422	0.134422341409782
ENSG00000233621	92.5925601260075	-1.07252991058399	0.438169224989961	-2.44775271610771	0.0143750276317723	0.134633832555603
ENSG00000115414	7043.72814380751	1.40856216880467	0.57536740823627	2.44810906673089	0.0143608177021143	0.134633832555603
ENSG00000270069	116.974357652346	1.18317292111738	0.483199280974741	2.44862309962591	0.0143403418197156	0.134633832555603
ENSG00000122862	5.95503811697468	2.60694520919688	1.06481352977365	2.44826454238523	0.0143546217977152	0.134633832555603
ENSG00000155252	1419.34556467319	0.547172036339949	0.223527881202373	2.44789166074796	0.0143694855649684	0.134633832555603
ENSG00000007516	45.0154024517747	1.30307573346913	0.532323216555163	2.44790325303066	0.0143690232702809	0.134633832555603
ENSG00000023909	749.94453405789	0.838080562434466	0.342473191774034	2.44714209043094	0.0143994059334248	0.134788780785948
ENSG00000124762	14435.3815966475	0.533847570299892	0.218238787441231	2.44616264853309	0.0144385848145793	0.135082029219596
ENSG00000110172	43.4737533357451	-2.27074686255432	0.928556374865701	-2.4454593431473	0.0144667758557223	0.135198739053613
ENSG00000254854	14.7651443685002	-1.98389053873995	0.811228588413964	-2.44553824541448	0.0144636107500763	0.135198739053613
ENSG00000104738	1183.40176304951	-0.534796826173153	0.218750618259866	-2.44477858132423	0.0144941094873808	0.135380648062099
ENSG00000100532	126.55506180331	0.64676897187729	0.264632574125225	2.44402630331985	0.0145243675613509	0.135589660278373
ENSG00000219507	88.9316467717985	0.905460020782247	0.370618053433741	2.44310824147191	0.0145613692324107	0.135640691739916
ENSG00000148229	964.950938347237	-0.39625949334312	0.162191401458876	-2.44315968527834	0.014559293639317	0.135640691739916
ENSG00000267909	19.5299003201514	-1.70260923529439	0.696830838455973	-2.44336091535071	0.014551177154953	0.135640691739916
ENSG00000171903	149.143214653944	1.47459303385958	0.603473894678982	2.44350757648595	0.0145452641868763	0.135640691739916
ENSG00000140479	438.75794099912	-1.38942835914117	0.568767886524638	-2.44287413558287	0.0145708179517753	0.135655261288038
ENSG00000143412	753.70097830432	-1.11739340392567	0.457558609699611	-2.44207710277651	0.014603027439014	0.135661494108118
ENSG00000189014	10.4226756220528	-2.26324377021175	0.926709564298179	-2.44223633531371	0.0145965875612171	0.135661494108118
ENSG00000026103	575.416335124644	0.952021255509189	0.38976441365968	2.44255561088868	0.0145836825690655	0.135661494108118
ENSG00000167880	14080.1577272995	-0.852925771739018	0.349206934822672	-2.44246515943945	0.0145873375591942	0.135661494108118
ENSG00000162976	210.446613287783	0.890929193549484	0.364867010446175	2.44179157896467	0.0146145812164158	0.135695558461109
ENSG00000054148	1307.60568625458	0.479795247340294	0.196537727249646	2.44123738507899	0.0146370297844513	0.13583068901914
ENSG00000171488	698.767254146208	1.11558787368825	0.457195581004802	2.44006705234654	0.0146845360057874	0.136198081929688
ENSG00000188761	116.03334271343	1.29500556585253	0.530842957547855	2.4395266951164	0.0147065160458841	0.136216136669233
ENSG00000146373	990.701485038096	-0.559491968669079	0.229353062199794	-2.43943535483165	0.0147102343464944	0.136216136669233
ENSG00000151474	117.142483674236	-0.947252914439395	0.3882557694334	-2.43976519865182	0.0146968108963949	0.136216136669233
ENSG00000232445	42.3423503335212	-1.42079708226221	0.582733794391752	-2.43815803362702	0.0147623187048852	0.136551448020188
ENSG00000220842	281.007956423724	-0.658559316766433	0.270105192342293	-2.43815867090725	0.0147622926785203	0.136551448020188
ENSG00000110237	515.760901311233	0.706408026957404	0.289755860749672	2.43794215285154	0.014771137549085	0.136559603187538
ENSG00000143344	57.1840090203576	-1.17565806013005	0.482343874342965	-2.43738569652512	0.0147938904965262	0.136695391850416
ENSG00000164093	181.186877234446	-3.54864942438766	1.4560386647462	-2.4371944992314	0.0148017154906902	0.136695391850416
ENSG00000143842	727.425703272745	0.515023888958206	0.211447101049785	2.43571033322866	0.0148625810320519	0.136714856700663
ENSG00000106351	554.682493789713	-1.04040749784197	0.427041963303869	-2.43631208931487	0.0148378765273928	0.136714856700663
ENSG00000174804	33.5412232159767	1.22768590198286	0.503979426945198	2.43598416194151	0.0148513347731499	0.136714856700663
ENSG00000281386	16.9008688088831	-1.83171924052566	0.751931323649057	-2.4360193317077	0.0148498908797849	0.136714856700663
ENSG00000139116	1163.85947518954	-0.503434307739427	0.206635585531562	-2.43633886411366	0.014836778155666	0.136714856700663
ENSG00000013503	369.811019223955	-0.700803935429907	0.287734391903054	-2.43559322469185	0.0148673930187121	0.136714856700663
ENSG00000092445	350.016657417974	-1.10694671685875	0.454255127207575	-2.43683923539497	0.0148162648037799	0.136714856700663
ENSG00000185453	162.760771889444	-0.73678382959453	0.302474953085476	-2.43585071120359	0.0148568147132898	0.136714856700663
ENSG00000167797	528.396761222455	0.516713753562795	0.212339598272239	2.43343096514819	0.0149564872043643	0.13742524115675
ENSG00000213606	10.4601568352692	-1.93501458651573	0.795212260301585	-2.43333092699284	0.014960620557198	0.13742524115675
ENSG00000114853	785.490117934317	0.531499327304399	0.218536478583097	2.43208516376958	0.0150121770626869	0.137696061482012
ENSG00000178719	2855.77530967063	0.482382472119681	0.19835625179823	2.4318995128541	0.0150198736990651	0.137696061482012
ENSG00000185862	7.67477610658035	2.83590568086456	1.16596084861913	2.43224777592077	0.0150054384120062	0.137696061482012
ENSG00000159263	540.708138334687	1.46256866982774	0.601423365954963	2.4318454397019	0.0150221160942596	0.137696061482012
ENSG00000124145	10569.5295625894	0.490777206889533	0.201940608128736	2.43030468927114	0.015086134524721	0.138209235621845
ENSG00000179222	2218.82701363539	0.680345225544119	0.279980280173629	2.42997551514058	0.0150998428741465	0.138261200984401
ENSG00000162407	306.567545448167	-0.802590651577417	0.330322266583527	-2.42972010297244	0.0151104869881006	0.138285068420357
ENSG00000155966	9.15752829834961	4.70557230939993	1.93706209585671	2.42923152513538	0.0151308665214142	0.138327065800733
ENSG00000126368	970.499464670668	0.470229474483756	0.193571840262909	2.42922459095853	0.0151311559335646	0.138327065800733
ENSG00000042286	102.191197762697	0.737025048152903	0.303446935694999	2.42884327193768	0.0151470785753322	0.1383990902223
ENSG00000145911	596.167272065747	-0.973237497757004	0.400797285226731	-2.42825371735351	0.0151717254999947	0.138508184981602
ENSG00000106004	106.71461083411	-2.74787555379052	1.13166401407104	-2.42817260213597	0.0151751193659006	0.138508184981602
ENSG00000162913	20.8632368689537	1.67787617093937	0.691076145188194	2.42791794018943	0.0151857787826889	0.138531985130521
ENSG00000120658	19.008462308517	1.74316135101381	0.718145522242847	2.42730936422152	0.0152112787316307	0.138691070788397
ENSG00000143147	432.284853174811	0.956420191351859	0.394091545850327	2.4268985250323	0.0152285146205242	0.138774679049851
ENSG00000197555	1082.73536411776	0.480614685207561	0.198053878694542	2.42668655809974	0.0152374139676789	0.138782269620919
ENSG00000204789	245.430986440827	0.626494040830077	0.258226775573967	2.4261389603675	0.0152604258388689	0.138918320930021
ENSG00000171603	8448.21240099223	0.516620482351874	0.213003384911468	2.42540973030358	0.0152911180047476	0.139124106436638
ENSG00000114270	14330.8507832955	0.963535844013883	0.397299334330088	2.42521383943057	0.0152993720033506	0.139125631774655
ENSG00000142208	2938.5929890801	0.407310080468551	0.167966410967838	2.42494959630078	0.0153105122861251	0.139153388210661
ENSG00000163689	214.32253523228	1.01052231904363	0.416794478662547	2.42450985024153	0.0153290674660898	0.139248471887051
ENSG00000122176	34.5207825765887	1.65980520141672	0.684886657526784	2.42347428319088	0.0153728416627381	0.139572422589662
ENSG00000121552	18712.0962992361	-1.05355991963543	0.434818857510962	-2.4229858053221	0.0153935281549706	0.139612889776631
ENSG00000100003	2519.8401891235	0.523082525003639	0.215882589724819	2.42299541463904	0.0153931209749815	0.139612889776631
ENSG00000104687	3588.68435670945	0.750079370505647	0.309674460226952	2.42215444552946	0.0154287916553664	0.139858988635711
ENSG00000127249	1134.64144986014	-0.903328352325693	0.373063476038235	-2.42137976603507	0.0154617149417383	0.140083625893948
ENSG00000204634	2047.40938278146	0.820093672532507	0.338790763618753	2.42064944089023	0.0154928098081738	0.140291469868226
ENSG00000149289	702.505308439191	0.50607749851786	0.209191068342399	2.41921178818937	0.015554181210695	0.140722165278807
ENSG00000111664	11.0986108235098	2.87235524960054	1.18733963578003	2.41915216425292	0.0155567310874915	0.140722165278807
ENSG00000081041	147.019414346129	1.47224214499301	0.60887072417609	2.41798806632592	0.0156065886392395	0.140879016594525
ENSG00000122547	59.9916509010207	1.02087215638342	0.42215379885281	2.41824699708401	0.0155954866628562	0.140879016594525
ENSG00000261469	23.5108641293594	-1.64122865479496	0.678759503072662	-2.4179825805242	0.0156068239249733	0.140879016594525
ENSG00000090924	627.78849085743	0.78236577002012	0.323523904722751	2.41826263407206	0.0155948164302092	0.140879016594525
ENSG00000125356	752.129473569124	-0.718774711585406	0.29733386878414	-2.41739938515792	0.0156318549512654	0.141030972436561
ENSG00000072786	797.933576673157	0.767064967873767	0.317793095302562	2.41372446164529	0.0157903984924958	0.142327960360401
ENSG00000139154	1302.13713517176	-0.568134635470542	0.235380715859481	-2.41368386274138	0.0157921578801514	0.142327960360401
ENSG00000038210	400.215797634205	-0.488792133132627	0.202531566253649	-2.41341210248908	0.0158039392797458	0.142359568224098
ENSG00000116396	174.101453922704	0.923850579778529	0.383213507802357	2.41079857825629	0.0159176364829462	0.143221092471286
ENSG00000170260	436.722350185757	-0.541444956400468	0.224585284197795	-2.41086569110917	0.0159147078714132	0.143221092471286
ENSG00000224905	6.28052332521651	4.11265341572703	1.70604206571747	2.41064009989547	0.0159245539027939	0.143221092471286
ENSG00000167716	162.574299333655	1.12913528859897	0.468455908010136	2.41033418362723	0.0159379143142749	0.143266361430041
ENSG00000171631	104.578528188211	-1.48119452948511	0.614800933830191	-2.40922621938342	0.0159863854353725	0.143627029459835
ENSG00000057757	927.445633046582	-0.486639371778236	0.202021078892453	-2.4088544346271	0.0160026792587357	0.143698380295693
ENSG00000177459	38.5559329430224	1.53381221971148	0.636888709906821	2.40828922832669	0.0160274779374854	0.143845987435804
ENSG00000134215	1550.79187574103	-0.840364060737105	0.349030762834238	-2.40770771582736	0.0160530273126487	0.14400017461633
ENSG00000184330	406.506791779461	-3.88317458604893	1.61341141061117	-2.40680991872864	0.0160925433025064	0.144279420281199
ENSG00000137872	180.412694017242	-1.54629538434991	0.642566017374364	-2.40643815972146	0.0161089310648224	0.144351124463682
ENSG00000135378	4570.34302076803	-0.594890300141034	0.247310300062083	-2.40544085705972	0.0161529663251086	0.144670372526545
ENSG00000171388	6.35137184819249	3.7114871824667	1.54399626513464	2.40381875673971	0.0162248151314995	0.145238264483584
ENSG00000119673	133.045742885878	1.29764761337173	0.539929296881522	2.40336581264728	0.0162449277912325	0.145267142748522
ENSG00000285188	11.1275438373256	3.11355630717124	1.29546827007663	2.40342151103946	0.0162424533629264	0.145267142748522
ENSG00000036672	38.1809605278449	-1.72610052774696	0.718540679074	-2.40223076857865	0.0162954248881101	0.145643005298667
ENSG00000243650	14.1725605740511	1.85296550019204	0.771447962819735	2.40193193772815	0.0163087425211212	0.145686352583536
ENSG00000134533	36.9911646739744	-2.00526563327443	0.834976126090276	-2.40158439339334	0.0163242431371587	0.1457491453943
ENSG00000220412	9.28877581838253	3.96788949509857	1.65266110614759	2.40090934574473	0.0163543875246338	0.145942550498612
ENSG00000109743	7.61412311202463	-3.19588223265683	1.33141762408441	-2.40036046905611	0.0163789337608912	0.146085824445896
ENSG00000146147	65.7015629186162	-1.40475596652826	0.585340439468998	-2.39989563646519	0.016399746779314	0.146195670123367
ENSG00000204370	734.633454258019	-0.536271528461972	0.223493571161619	-2.39949420323222	0.0164177397659515	0.146280275853545
ENSG00000008513	1674.12737107972	0.740605811237314	0.308790993584253	2.39840483247528	0.0164666548105267	0.146640163568898
ENSG00000272622	8.33294215504431	3.206668651193	1.33744485224921	2.3976081300102	0.01650250943384	0.146883432389662
ENSG00000229056	11.729998106062	2.12608841955485	0.887894142258018	2.39452916554665	0.0166417198597644	0.148045910127842
ENSG00000107249	46.6063942536792	1.67822799121917	0.701000318503734	2.39404740186324	0.0166635950736717	0.148163903484508
ENSG00000180758	2556.99136288491	0.438325224156649	0.183242591824145	2.39204881241421	0.0167546139345753	0.148786317728048
ENSG00000189136	135.52080842538	1.28219874982518	0.536049506393086	2.39194092063008	0.0167595398870653	0.148786317728048
ENSG00000126562	16.6519225951591	2.19569094753111	0.917859895581221	2.39218529767086	0.016748384327585	0.148786317728048
ENSG00000121068	51.1669542334862	1.46947642944096	0.614650993174154	2.39074929636468	0.0168140298106876	0.149193080398597
ENSG00000177679	537.838739152636	-0.936196091659688	0.391750080196486	-2.38977894067087	0.0168585165100187	0.149433681893288
ENSG00000100842	594.649979287979	-0.627899893648399	0.262723609225391	-2.38996371700163	0.0168500373427925	0.149433681893288
ENSG00000122952	227.884954448413	-0.994540291511221	0.416226384872735	-2.38942154475697	0.0168749276140739	0.149502126467632
ENSG00000168143	1881.59858289586	-0.639994242154076	0.26794321813432	-2.38854428415967	0.0169152696181147	0.149705356882543
ENSG00000168447	1000.54631982357	-1.04189579388725	0.436173177152509	-2.38872046348451	0.0169071609898526	0.149705356882543
ENSG00000278616	27.5671551194797	1.27596758103725	0.534306748543027	2.38808060073472	0.0169366268961607	0.149817308868095
ENSG00000184857	142.519062231738	-0.60867195348801	0.255046551896073	-2.38651316382444	0.0170089984232225	0.150380173623609
ENSG00000087191	1993.26475790073	-0.363695445166188	0.152419252911316	-2.38615160630529	0.0170257306848247	0.150450794264206
ENSG00000227403	51.4003731783836	-1.67628803462606	0.702600981673555	-2.38583218405593	0.0170405250133353	0.150504226311311
ENSG00000159556	14.3080621228224	1.54150972015385	0.646315224454643	2.3850741276512	0.0170756802355181	0.150737341432575
ENSG00000258645	20.0042201457264	1.64680221611202	0.690851186839291	2.38372930014972	0.0171382038468011	0.151211690863699
ENSG00000188573	10.3999554217216	-3.44093998533686	1.44452598876988	-2.382054744662	0.0172163378253826	0.151823214908102
ENSG00000170835	286.764231412856	-1.31879551038341	0.553960038645357	-2.38066903455413	0.0172812305033371	0.152214182413464
ENSG00000111275	419.877370417329	-1.29929688463039	0.545719790707656	-2.38088650394288	0.0172710322612346	0.152214182413464
ENSG00000165948	6.9368778474763	3.78802406864037	1.5913707269278	2.38035299037659	0.0172960608322187	0.152214182413464
ENSG00000179361	188.551774443793	0.715386405583323	0.300522883254792	2.38047232155961	0.0172904599220091	0.152214182413464
ENSG00000104312	376.765202852667	0.699376966624231	0.293862020934109	2.37995016981472	0.0173149793101668	0.152224945851517
ENSG00000110700	7583.94333561519	-0.486667192040566	0.204481574244745	-2.38000511213823	0.0173123978741658	0.152224945851517
ENSG00000123600	644.665508794997	-0.478699948364508	0.201183248535419	-2.37942250087601	0.0173397887507935	0.152365201970073
ENSG00000160588	1353.05557015553	-0.811431634879394	0.341052977261248	-2.3791952833704	0.0173504814478307	0.152381334002004
ENSG00000164236	50.6110925816026	1.17157440628675	0.492703292976287	2.37784975864396	0.0174139194861073	0.152704630356002
ENSG00000078269	458.609605820185	-0.745758744605228	0.313583917783998	-2.37817918047353	0.0173983693196076	0.152704630356002
ENSG00000133315	256.401955761258	0.897387100716341	0.377368519831472	2.37801261514104	0.01740623041707	0.152704630356002
ENSG00000101680	75.5708446492069	1.04778982227067	0.440929279060697	2.3763217187635	0.0174862092010953	0.153182397813057
ENSG00000171827	177.760144899353	0.65610275551546	0.276087693685099	2.3764288322963	0.017481133227994	0.153182397813057
ENSG00000164687	31143.8260097566	-0.468957430753487	0.197388378351824	-2.37581074767036	0.0175104412561324	0.153316611609037
ENSG00000221883	17.2610633671109	-1.42168445199784	0.598501654859873	-2.37540605018159	0.0175296543283729	0.153406766388431
ENSG00000267387	7.3465115288625	2.40290453717736	1.01202819111003	2.37434545626814	0.0175800938874288	0.153769962040271
ENSG00000034510	27753.9306928896	0.650432413689642	0.27396476290697	2.37414624708692	0.0175895820256246	0.153774775788044
ENSG00000003249	539.082329706738	-0.552529288593029	0.23285217974945	-2.37287574111418	0.0176502006539097	0.154226359700618
ENSG00000196693	393.480084898498	-0.511008920090354	0.215439721557416	-2.37193455504058	0.0176952246946232	0.154541289782229
ENSG00000162430	1208.96402785794	0.368777885019099	0.155498788446562	2.3715804393282	0.0177121907666994	0.154545653153721
ENSG00000115457	5134.43445560647	0.709444338481279	0.299148061907557	2.37154917186297	0.0177136895099761	0.154545653153721
ENSG00000159208	107.512112206631	1.11852938870677	0.471809940890416	2.37072026629163	0.0177534619851148	0.154814147721186
ENSG00000156642	3821.89815315564	0.507713359970867	0.214202518431343	2.37024925611974	0.0177760968039849	0.154898745169381
ENSG00000125844	8370.77343031414	0.357718543615263	0.150926938791617	2.37014376942449	0.0177811695268543	0.154898745169381
ENSG00000129646	176.758749335653	1.06470482256044	0.449265543436532	2.36987865665432	0.017793924067907	0.154931408698553
ENSG00000168685	142.323002109113	0.986160423307171	0.416290217617856	2.36892528714773	0.0178398568251645	0.155252775253897
ENSG00000183032	25.1477212895884	1.67385415904894	0.706838251179513	2.36808655481753	0.0178803523007872	0.155526522414076
ENSG00000071246	13.014948532802	2.57572636779493	1.08818011467688	2.36700370927082	0.0179327530828928	0.155903495094073
ENSG00000076513	2117.62940152694	-0.661579162080453	0.279545814829865	-2.366621594686	0.017951276359468	0.15595997133976
ENSG00000266066	19.8754225573434	1.2875069889109	0.544056320900838	2.36649578260403	0.0179573788563827	0.15595997133976
ENSG00000083857	9730.59006652448	0.796172191879496	0.336947828205655	2.36289456477385	0.0181328275839765	0.157404287882097
ENSG00000153904	75.4081428711929	1.34777507243169	0.570503293050942	2.3624317139767	0.0181554858534386	0.157521499802527
ENSG00000087269	1329.50517928225	-0.409293298199854	0.173413621316767	-2.36021423860479	0.0182643837912872	0.158226950216061
ENSG00000165215	41.3047689970491	1.7917150980508	0.75909365651505	2.36033470003748	0.0182584533981576	0.158226950216061
ENSG00000119977	568.633176729936	0.528138274498001	0.223760910070012	2.36027943545972	0.0182611738992197	0.158226950216061
ENSG00000136237	413.827290481981	-0.907157565206674	0.384406089301921	-2.35989384781616	0.0182801650422686	0.158283965552205
ENSG00000231062	18.605359362854	-2.79307150036605	1.18466383598301	-2.35769119941813	0.018388982765429	0.159146100844671
ENSG00000171612	182.695482400398	-0.702594649664166	0.298204045544093	-2.35608691485803	0.0184685959171021	0.159754747488055
ENSG00000131089	360.251353182742	0.43076025738572	0.182863835952122	2.35563393463158	0.0184911297528384	0.159788994172569
ENSG00000176974	11.737584818839	-2.62068809566476	1.11245945877912	-2.35576054029048	0.0184848292394463	0.159788994172569
ENSG00000145860	6434.5512940843	0.508842082400861	0.216058784956196	2.35510943238908	0.0185172515607881	0.159934394128192
ENSG00000196711	18.3227736653784	2.39490933929646	1.01708184534643	2.35468694112885	0.0185383163882976	0.160035992704797
ENSG00000128881	332.729084167517	0.650371077926702	0.276239474610418	2.35437414889354	0.0185539252811636	0.160090413471625
ENSG00000103740	7.90753725598076	-3.00115426038879	1.27521259521239	-2.35345406064543	0.0185999060200303	0.160406708308081
ENSG00000019485	161.189276991331	-0.744699178114044	0.316507454217443	-2.35286457930444	0.0186294172948519	0.160580723726417
ENSG00000171462	138.105932857513	-1.24222837283941	0.528064274019273	-2.35241888905756	0.0186517571278287	0.160692779861939
ENSG00000262454	199.677542004012	0.729686217709139	0.310234465950147	2.35204755691586	0.0186703877210898	0.160772783153829
ENSG00000023902	105.202645993433	0.950508659180906	0.404389978647644	2.35047530692918	0.0187494516647198	0.161211552169667
[truncated: 56,885 more rows]
