# Supplementary material for: Characterization of 3D organotypic epithelial tissues reveals tonsil-specific differences in tonic interferon signaling
Source: bioRxiv preprint, doi:10.1101/2023.01.19.524743, version 1 (2023-01-20)
Supplement: Supplementary File 9 [file 524743_file28.csv]

	baseMean	log2FoldChange	lfcSE	stat	pvalue	padj
ENSG00000178919	1575.68332217779	6.18709183057821	0.271374810579972	22.7990645755049	4.68416379602382e-115	8.05910381105899e-111
ENSG00000198807	1697.27569239833	5.29256557621983	0.314901855609035	16.8070320385498	2.16755507473563e-63	1.86463925304133e-59
ENSG00000159263	540.708138334687	8.39895090726929	0.555023313421971	15.1326092150723	9.87030224909659e-52	5.6606183398569e-48
ENSG00000186395	18736.5839897011	-6.24947180367155	0.429987249080706	-14.5340863410081	7.36901726646218e-48	3.16959855173704e-44
ENSG00000065320	476.700319452223	7.33502526024383	0.531062265909165	13.8119872773985	2.15795196107164e-43	7.4255126980475e-40
ENSG00000196344	301.256032860027	7.50367372474737	0.561210417980888	13.3705175177324	8.99130868022434e-41	2.57825776405433e-37
ENSG00000206073	2704.12677508844	-3.16163185636042	0.243035139273196	-13.0089495116442	1.08827814736739e-38	2.67483221792228e-35
ENSG00000181449	312.396754714501	4.31119790191992	0.351286036561006	12.2726139192021	1.2708331831121e-34	2.73308561443046e-31
ENSG00000186340	2057.73738003383	-5.01171946448129	0.409521526187706	-12.2379878565508	1.94802203872126e-34	3.72396879735547e-31
ENSG00000182752	886.232322989132	4.43751383391316	0.363079299420823	12.2218860755538	2.37509593225009e-34	4.08635255143628e-31
ENSG00000177508	1007.21214528799	-5.55979886268074	0.461402443421661	-12.0497820112318	1.94463528558055e-33	3.04158637167395e-30
ENSG00000254166	195.326765694461	7.8407743702212	0.680334632588607	11.5248790736815	9.88508926221151e-31	1.41727467296957e-27
ENSG00000172164	361.513706464507	5.1140562248162	0.462527038524513	11.0567724670331	2.03281291083424e-28	2.69034970237716e-25
ENSG00000038427	1493.39079712184	6.1435947346729	0.558232644265128	11.005437961731	3.59763589637557e-28	4.42123754265298e-25
ENSG00000087495	119.994363345663	-4.04718855334293	0.370965314688333	-10.9098840055793	1.03388183115255e-27	1.18586246033197e-24
ENSG00000250026	438.568347443862	4.24889950364375	0.395969041885327	10.7303830708923	7.32917120995819e-27	7.88114941670816e-24
ENSG00000145287	430.046305118636	4.82638917264631	0.475663193965146	10.1466525766128	3.42924466399474e-24	3.47059732023702e-21
ENSG00000183347	4419.06459355163	3.58569109932442	0.358633593730247	9.99820195879772	1.55189126082269e-23	1.48334939680302e-20
ENSG00000134830	367.905160744966	4.15890388759884	0.425076713694628	9.78389018643483	1.32035813369237e-22	1.19561903632512e-19
ENSG00000101445	92.9759765260652	6.24633117339198	0.647268706741832	9.65029068813514	4.9016585686892e-22	4.21665178371488e-19
ENSG00000071282	115.059697855871	5.05692080970544	0.526328026431025	9.60792615205367	7.40248552680153e-22	6.06475064231525e-19
ENSG00000170915	417.38089240682	5.49863579774465	0.578794761094004	9.50014783712184	2.0959253206626e-21	1.63910887009091e-18
ENSG00000124920	268.661595938447	3.85922607764812	0.408687174327272	9.44298309336639	3.62314545077781e-21	2.71027032524488e-18
ENSG00000107551	182.305182089227	4.66074187499474	0.496978553471935	9.37815493733964	6.71372425475137e-21	4.81290107512489e-18
ENSG00000283098	72.1590624544737	5.91630689697539	0.632108130129839	9.35964373019555	8.00060071784697e-21	5.50601341402229e-18
ENSG00000062096	125.939620629489	-4.43961494665866	0.482771237179333	-9.19610491419873	3.71160229406789e-20	2.45608144113223e-17
ENSG00000180818	163.120571419095	-11.3149275768338	1.23557436002192	-9.15762575117942	5.30516406133382e-20	3.38056843241661e-17
ENSG00000103034	1202.62722917658	-2.59749398530806	0.2859857493314	-9.08259936511061	1.06012236332955e-19	6.51407330753034e-17
ENSG00000164684	136.106760106046	4.75928847840762	0.527321960807496	9.02539403274548	1.7904983301826e-19	1.02685079235972e-16
ENSG00000186529	495.416409412884	-3.26813339088449	0.362092420789108	-9.02568847964907	1.78568941446734e-19	1.02685079235972e-16
ENSG00000143153	7102.64424014947	2.49263905446025	0.276471772023216	9.01588989074419	1.95278509004795e-19	1.08379572497661e-16
ENSG00000182809	201.685086390259	2.84308069494764	0.316433863071522	8.98475487847846	2.59311669234957e-19	1.39420539662108e-16
ENSG00000183778	1087.11894452054	8.79376354703704	0.98019336747596	8.97145791720807	2.92615252581257e-19	1.52558952141228e-16
ENSG00000253552	180.980919464243	-4.30564817833219	0.487021673055733	-8.84077324796892	9.50584051833967e-19	4.81023488582453e-16
ENSG00000113578	105.172402279437	4.78426907864464	0.546748814635349	8.75039680119925	2.12603847783952e-18	1.0450997717494e-15
ENSG00000124615	193.346127800109	-2.44774591988764	0.282028209721637	-8.67908186313551	3.98976457500038e-18	1.90677498646893e-15
ENSG00000140600	65.1467699233127	5.42356033734118	0.628936870492187	8.62337794427104	6.50074587447703e-18	3.02284683163182e-15
ENSG00000176842	411.008835013197	-5.13363058954939	0.596553652853834	-8.60548010223519	7.59979833939154e-18	3.44090869550609e-15
ENSG00000178372	2007.43427844391	-5.19011895089708	0.609969707787686	-8.50881426509071	1.75721058696869e-17	7.75200208943497e-15
ENSG00000155093	218.179114967509	5.66229825708742	0.67251400866934	8.41959897354561	3.77775197504347e-17	1.62490556826557e-14
ENSG00000130775	517.41152742028	1.92304568641221	0.230561160320073	8.34071828812176	7.38406180551201e-17	3.09860447228864e-14
ENSG00000156218	175.291965589165	6.33331666069982	0.762642668115291	8.30443525583386	1.00295339593752e-16	4.10852694692978e-14
ENSG00000151090	485.277419629536	-2.33831903819296	0.281779960860336	-8.29838655330052	1.05534812270529e-16	4.22261963980104e-14
ENSG00000156413	769.672839245151	3.18846996555565	0.385138300219801	8.27876626068081	1.24457954526068e-16	4.86658888095681e-14
ENSG00000106688	364.040108945827	5.78974292884913	0.704330476367675	8.22020787558078	2.03150744416396e-16	7.76713012818689e-14
ENSG00000213626	499.73840952124	3.90919901585645	0.477816360089056	8.18138377498805	2.8060266671096e-16	1.04951497407871e-13
ENSG00000115935	80.666120510897	3.72223175422268	0.457102713537878	8.14309704139229	3.85293213937459e-16	1.38103536370708e-13
ENSG00000101210	526.496621107504	3.54705274839189	0.435565047789828	8.14356607902901	3.83802896822242e-16	1.38103536370708e-13
ENSG00000197496	419.162937650799	3.78973549006099	0.470908987436088	8.04770261594408	8.43626330223967e-16	2.96216143091905e-13
ENSG00000186493	90.0354655248358	-3.19359868521312	0.399300860179021	-7.99797597175552	1.26481045752044e-15	4.35221278432783e-13
ENSG00000154556	1253.94153888715	2.72248647242565	0.343993795983986	7.91434759640954	2.48552981240444e-15	8.38500792596437e-13
ENSG00000169908	8789.70115453446	1.77328940224682	0.224849360508933	7.88656635817457	3.10614420204585e-15	1.00832473577734e-12
ENSG00000182636	157.488274213926	4.16474321105975	0.52804618152579	7.88708138940749	3.09335677307229e-15	1.00832473577734e-12
ENSG00000123364	96.9160962884794	-3.8875286845123	0.493327548031443	-7.88021812287791	3.2681007338289e-15	1.04125320602826e-12
ENSG00000173597	219.451740395064	3.12138271851658	0.398613848216208	7.83059277163784	4.85575079228777e-15	1.51896713420566e-12
ENSG00000180806	48.9840581138745	-4.34365261530286	0.556044979727428	-7.81169289116162	5.64249125797427e-15	1.73355468024013e-12
ENSG00000168824	722.653700120239	-1.94781760489465	0.250489754294641	-7.77603702945674	7.48318109914629e-15	2.2197953588071e-12
ENSG00000145335	160.83005158979	3.49015479306197	0.448721106132035	7.77800452300322	7.36774363116808e-15	2.2197953588071e-12
ENSG00000168907	736.339971530415	-2.84807949573773	0.368739374755089	-7.72382796827536	1.12887174325215e-14	3.29190480383955e-12
ENSG00000187689	957.935711612299	8.71287286326774	1.12950447363181	7.71388964512232	1.22040008700533e-14	3.49949724948777e-12
ENSG00000042980	263.100656348426	4.99116246424703	0.652820005455039	7.645541531418	2.08067779213649e-14	5.86853465798498e-12
ENSG00000203837	1508.88980657744	-2.44801300014706	0.321477179368967	-7.61488888558841	2.6391840888503e-14	7.32373584655957e-12
ENSG00000078081	430.971014467815	-3.38418236505843	0.446690855687801	-7.57611740192793	3.56049635706417e-14	9.57161559738891e-12
ENSG00000149131	910.878909014954	-3.7526165458124	0.495218514640218	-7.5776983995413	3.51738893427549e-14	9.57161559738891e-12
ENSG00000119919	52.6406501726941	9.81001382374771	1.29627365194469	7.56785714885939	3.79430889608482e-14	1.00432437780214e-11
ENSG00000214357	922.49438656895	2.67440398843778	0.354697454284474	7.53995822674514	4.70122027591295e-14	1.22552264919822e-11
ENSG00000166165	1059.10422914675	1.98200170350378	0.264044686474209	7.5063116397814	6.08165397496188e-14	1.5617142781973e-11
ENSG00000139278	210.599509176703	2.74885163033566	0.367952483059302	7.47067014599445	7.9787429963017e-14	2.01873931252016e-11
ENSG00000166634	113.153312459483	-6.22447228721057	0.835390457891331	-7.45097364760691	9.26538703141965e-14	2.31030411413877e-11
ENSG00000101347	1336.65659693033	-1.89320473246767	0.256244163900383	-7.38828429748616	1.48735464420712e-13	3.65570523622621e-11
ENSG00000134326	712.208869793855	-3.80512083325628	0.519191679759944	-7.32893261119985	2.31992996540087e-13	5.6217457823552e-11
ENSG00000233834	399.081329907154	4.16663041567203	0.569698132084655	7.31375123247357	2.5978589879719e-13	6.20780054000785e-11
ENSG00000162723	93.7640431682708	3.21423518715287	0.444135335925859	7.23706250585167	4.58506869239982e-13	1.08063160072245e-10
ENSG00000170421	5268.12328676501	3.91416484001479	0.543102508006767	7.20704615115866	5.71786286572114e-13	1.32940311628016e-10
ENSG00000138642	3462.61077606848	-2.87530143713155	0.401807013964076	-7.1559264452975	8.31096999518527e-13	1.90015297259848e-10
ENSG00000170561	391.852761469474	-3.78523487911855	0.529065350797524	-7.15456960735116	8.39358476707261e-13	1.90015297259848e-10
ENSG00000121005	68.3837500537932	5.267506178896	0.737983384179317	7.13770295079718	9.49034413151211e-13	2.12053728289176e-10
ENSG00000106537	1388.23389640241	1.59927826036855	0.224487671188418	7.12412513302899	1.04743851937822e-12	2.31040765716695e-10
ENSG00000130066	21306.4881396101	1.62336844624468	0.228510797901238	7.10412138574868	1.21090394609913e-12	2.63716485982728e-10
ENSG00000137507	56.5118074559212	5.00759481668515	0.706332808831772	7.08956847830328	1.34530820900099e-12	2.85753428837802e-10
ENSG00000139364	43.5107613708425	3.9669596632777	0.559436756940792	7.09098859533382	1.33157319522004e-12	2.85753428837802e-10
ENSG00000156587	1809.72389917996	-1.54066685632093	0.217412585706556	-7.08637382382445	1.37671619275636e-12	2.88858562150891e-10
ENSG00000103485	87.4639618067402	-4.18085856344952	0.590932620361659	-7.07501738673823	1.49430024202646e-12	3.0975223691645e-10
ENSG00000147100	354.200381574261	1.87523198753398	0.26553723393208	7.06203028390976	1.64087212998476e-12	3.36085773766521e-10
ENSG00000090382	59.9040415530929	7.11184123876845	1.00932420748299	7.04614155297403	1.83947131396154e-12	3.72330634784804e-10
ENSG00000000971	821.870949227109	3.33159250729666	0.473220563894127	7.04025302679373	1.91891049402929e-12	3.83893663369464e-10
ENSG00000251381	578.300624825702	3.56760212057254	0.50877073041671	7.0122000093254	2.34599498408547e-12	4.63940732197592e-10
ENSG00000109255	169.03111184897	2.14615346884104	0.30651367376424	7.00181966593697	2.52659165787581e-12	4.93977380383561e-10
ENSG00000113430	1116.52540109841	-3.27181879717262	0.469982938084879	-6.9615693082495	3.36502934645915e-12	6.50509324784604e-10
ENSG00000227467	59.7912634082097	-4.47986065058234	0.643875239373028	-6.95765324808047	3.45987506838216e-12	6.61412783905722e-10
ENSG00000112699	1146.83706756229	1.86540125855738	0.268715625218464	6.94191585264466	3.86817617920729e-12	7.31340342453422e-10
ENSG00000183876	332.748130852201	2.56178271715793	0.371219975299416	6.9009829416956	5.16439348557531e-12	9.65797716514383e-10
ENSG00000138109	54.9047836566457	5.45730769154617	0.792560421871034	6.88566769289697	5.75171145942311e-12	1.06406661999328e-09
ENSG00000184058	139.363233458096	5.30672286086244	0.772971342329576	6.86535524702516	6.63259896125611e-12	1.21397728860012e-09
ENSG00000268621	139.48804995157	-3.03494099318068	0.443410269860146	-6.84454375433819	7.67199866224918e-12	1.38943933667365e-09
ENSG00000196247	422.325627798529	-1.7594323891742	0.25715977658462	-6.84178689428612	7.82113796964607e-12	1.40169457049751e-09
ENSG00000186481	41.0252076333344	4.71385792832071	0.689922623375763	6.83244434753567	8.34797960760392e-12	1.48069060978171e-09
ENSG00000119714	796.370116838964	1.63022241487759	0.239472329595768	6.80756067988906	9.92674463603102e-12	1.74275144349912e-09
ENSG00000169508	59.0488081240442	7.44463681272363	1.0968184352334	6.78748330040555	1.14106462023384e-11	1.98303199910336e-09
ENSG00000164309	111.041880325562	-2.95743844758707	0.436951598432522	-6.76834335472464	1.30265321105126e-11	2.24121484961369e-09
ENSG00000158352	220.19281871986	2.85335192753784	0.423040702579168	6.74486381603876	1.53170621605854e-11	2.60920846012744e-09
ENSG00000173546	242.754528248028	2.51535944481926	0.373146225165883	6.7409483874614	1.57356101748888e-11	2.65422718685256e-09
ENSG00000258661	40.56544377371	6.80526193349206	1.011968597809	6.72477579662651	1.75863018853853e-11	2.93759537803936e-09
ENSG00000165389	2312.11531008558	-1.41869690681866	0.212452889835655	-6.67770115019903	2.42719346285438e-11	4.01537149311631e-09
ENSG00000134873	365.927674037476	9.65457631507173	1.44994489324599	6.65858155026711	2.76482867194444e-11	4.53036926674325e-09
ENSG00000168497	124.030615601464	-2.95990831348627	0.445140308120586	-6.64938281141786	2.94324579608985e-11	4.77722112469112e-09
ENSG00000115009	589.359295865369	3.58588816716249	0.539848011796069	6.64240321128956	3.08609320040169e-11	4.96226481429076e-09
ENSG00000135083	75.0254164835316	4.36767353726352	0.658074827063886	6.63704697040403	3.20029692767629e-11	5.09825080006209e-09
ENSG00000151229	167.977382972138	1.83625227018222	0.277682306938956	6.61278095253614	3.77166358869239e-11	5.95334605903234e-09
ENSG00000175147	292.476800521586	-1.88847030941066	0.286582949048244	-6.58961154417023	4.40978823125347e-11	6.89730968351963e-09
ENSG00000197757	35.3510406089176	-8.98645812069945	1.36473902961753	-6.58474472091408	4.55667618058378e-11	7.06284807990485e-09
ENSG00000112299	84.2156956836819	5.99207669037347	0.911596035638995	6.5731710715188	4.92548118344401e-11	7.5663306929602e-09
ENSG00000070526	1515.52619335934	2.00016852359789	0.304519802335976	6.56827079308001	5.09029098798681e-11	7.75030588038169e-09
ENSG00000087494	8237.27893721096	3.44932742532333	0.526111288499301	6.55626955878921	5.51704666268048e-11	8.32638489749277e-09
ENSG00000034693	412.924773689403	-1.41868568344721	0.216594808947495	-6.54995237577979	5.75554351666513e-11	8.60931306910649e-09
ENSG00000181790	204.361977420583	4.87035486563383	0.743714943648029	6.54868495951424	5.80459352523309e-11	8.60931306910649e-09
ENSG00000107201	999.509908370622	-2.20468486373763	0.337713170592094	-6.52827622882542	6.65309149242683e-11	9.74881755236472e-09
ENSG00000134339	3139.42095794285	3.53236175150714	0.541148087905358	6.52753253768297	6.68619861190954e-11	9.74881755236472e-09
ENSG00000137727	24.6570518795633	4.76949196997602	0.730911021155787	6.52540710418354	6.78170795910595e-11	9.80498196944688e-09
ENSG00000092969	365.359544644266	3.57953003296276	0.549954639205707	6.50877322924783	7.57669983099743e-11	1.08630933826926e-08
ENSG00000129925	1309.84836850456	1.02475428692072	0.157495911636086	6.50654532092582	7.68987103760452e-11	1.09342339836352e-08
ENSG00000143816	196.610050791153	2.36659071094111	0.364112231280931	6.49961881976761	8.05237804462027e-11	1.13558331358764e-08
ENSG00000261115	77.4033718064378	5.66825585743639	0.877353839049209	6.46062695021554	1.04270076697896e-10	1.45850948746935e-08
ENSG00000105997	96.6752732278256	-3.6244311347431	0.56125544889629	-6.45772106421515	1.06291420864485e-10	1.46299511677877e-08
ENSG00000111186	274.135287082811	2.98488494148033	0.462164056593992	6.45849649900951	1.05748309231926e-10	1.46299511677877e-08
ENSG00000134780	97.0229373502172	4.18944650388149	0.651034240029943	6.43506323674897	1.23421935063428e-10	1.68529713711609e-08
ENSG00000106541	1029.97424676922	3.06359534186743	0.480299119940206	6.3785154181603	1.78812845364621e-10	2.4224212633845e-08
ENSG00000228630	34.6818356222795	-7.16016364898564	1.12335711989007	-6.37389795480737	1.8428323232094e-10	2.47702579068888e-08
ENSG00000181381	1202.2742926979	-1.8632338935777	0.292842841399552	-6.36257278707225	1.98401964950598e-10	2.64612853253879e-08
ENSG00000123388	56.2636779355496	-7.13326631428893	1.12140189099682	-6.36102575852459	2.00410829078448e-10	2.65236024176515e-08
ENSG00000137628	3368.03901595534	-2.84394152606277	0.447171251699161	-6.35984874979411	2.01952507913911e-10	2.65236099134263e-08
ENSG00000111199	109.919913314541	2.95977702848622	0.46784044516672	6.32646676674452	2.50838292054168e-10	3.26944910211512e-08
ENSG00000271605	123.21648538016	4.24581525056254	0.673273546153738	6.30622616144351	2.85921154695191e-10	3.6987018545344e-08
ENSG00000179674	48.8147387136673	3.08788014673986	0.491565174426278	6.28173090240542	3.3482403816066e-10	4.29899072877175e-08
ENSG00000129048	54.9996880316395	-3.65877535823939	0.585740808582071	-6.2464067803238	4.20002490587992e-10	5.35269840782696e-08
ENSG00000144452	2379.27812607288	-2.77913167966995	0.446181689644418	-6.22869952795411	4.70322826158112e-10	5.94992957650758e-08
ENSG00000112303	212.767859728407	4.10061224356048	0.658627464366723	6.22599643260133	4.78504952786241e-10	6.00925380488123e-08
ENSG00000149177	278.00583465136	2.12456006386971	0.341863232139525	6.2146492051026	5.1439435860592e-10	6.41315575348903e-08
ENSG00000204021	75.5478038845152	-4.29159089014458	0.690755209931819	-6.21289688219389	5.2016586928012e-10	6.43845595752839e-08
ENSG00000204866	175.760712965578	-4.77228142350712	0.768909353281814	-6.20655920381037	5.41572242173329e-10	6.65553601899438e-08
ENSG00000106077	419.273560274369	1.59898315269162	0.257722217713059	6.2042891252468	5.49446921373149e-10	6.70442147675534e-08
ENSG00000124215	110.332588406421	2.43742237573009	0.393374255704904	6.19619189710921	5.78455957476692e-10	7.00868644252569e-08
ENSG00000223914	22.7380001315492	8.56863639245064	1.38543541897806	6.18479668923948	6.21825591206552e-10	7.48147503266345e-08
ENSG00000176387	150.944181958729	-2.85171013635606	0.461702337630492	-6.17651223294938	6.55331342422625e-10	7.82984426832032e-08
ENSG00000102359	2213.47781654758	1.46900785797955	0.237995792857497	6.17241103442169	6.72563745709180e-10	7.98031672063892e-08
ENSG00000109794	55.109739721154	3.44352899768064	0.559346198271301	6.15634647794712	7.44422680617014e-10	8.7724604246683e-08
ENSG00000147896	313.743583130239	-3.57801187090457	0.58290888843506	-6.13820091251394	8.34612666661884e-10	9.76837478225695e-08
ENSG00000156113	212.941102802506	3.89640988583159	0.635198599167336	6.13416007361995	8.56102849453184e-10	9.95219562489327e-08
ENSG00000026751	333.36968904912	-2.02781953615996	0.33087772133223	-6.12860705155743	8.86517718445517e-10	1.01806326641242e-07
ENSG00000019582	436.338038244088	4.05711040828648	0.662016257146348	6.12841507212351	8.87587852146837e-10	1.01806326641242e-07
ENSG00000146070	305.180310581353	5.95444726019978	0.972729197247402	6.12138226862059	9.27670490829722e-10	1.0569914433593e-07
ENSG00000128849	232.706156221279	2.7172289318962	0.444894399702538	6.10758178505499	1.01151983102135e-09	1.14494728241594e-07
ENSG00000135253	602.545516809517	3.18479344310962	0.521548057979332	6.10642374060155	1.01888283431972e-09	1.14574373623992e-07
ENSG00000183844	131.00510697062	3.41952218041987	0.561074323709794	6.09459751750922	1.09713135447427e-09	1.22572369829414e-07
ENSG00000168785	584.436169176337	1.68973713829246	0.277640810446182	6.08605462423544	1.15726972902836e-09	1.2763349799957e-07
ENSG00000125998	1619.62238623408	-2.53530086154871	0.416506679495655	-6.08705931107442	1.15003376186163e-09	1.2763349799957e-07
ENSG00000133401	688.764079026426	2.49562438423717	0.411069849825009	6.07104701378499	1.27078975092372e-09	1.39260749456322e-07
ENSG00000233276	4938.21601996961	1.38798210793632	0.228865013368062	6.06463210566903	1.322560334972e-09	1.44016775716413e-07
ENSG00000122592	34.9600158152312	-7.10131852774135	1.17144296560859	-6.06202669376402	1.34416898456542e-09	1.4544922880156e-07
ENSG00000107485	833.511023359755	-3.17856691887954	0.524719508121332	-6.05764960075499	1.38124864645666e-09	1.48527393514293e-07
ENSG00000013810	907.093294658625	-1.69815085460591	0.2809558840725	-6.04419039028815	1.50162107950733e-09	1.60468265049215e-07
ENSG00000173432	9217.44020613348	3.29719951492361	0.54715153105746	6.02611767996196	1.67944920249729e-09	1.78363725487444e-07
ENSG00000076716	215.516849195564	2.87350216692661	0.476941214720693	6.02485605822385	1.6926019254803e-09	1.78657767655758e-07
ENSG00000223764	53.4165254549353	5.43968267948285	0.904298149201006	6.01536416312374	1.79482753129662e-09	1.88292729731454e-07
ENSG00000143753	1329.90021829506	-1.21253847200527	0.201967938936852	-6.00361858613801	1.9296770892688e-09	2.01212692853756e-07
ENSG00000090339	390.820102586912	2.47285315588795	0.414665461934638	5.96348956662741	2.46907225541703e-09	2.5590595273765e-07
ENSG00000108242	121.27984684949	3.21667345452361	0.542436884250554	5.9300419051847	3.02857378007651e-09	3.12015640037224e-07
ENSG00000135046	98948.0107784691	1.91587876023168	0.323230278844774	5.92728740351628	3.07979682524926e-09	3.15404192728652e-07
ENSG00000166546	115.857034643676	2.73835488438137	0.463141380398456	5.91256795500646	3.36814814433213e-09	3.42893424989552e-07
ENSG00000109062	7806.39218074398	1.19287323239148	0.202012319281293	5.90495290898801	3.52747495928786e-09	3.57001215732633e-07
ENSG00000134321	861.827364393283	-5.15292539892682	0.873410583888091	-5.89977439475024	3.63998946382885e-09	3.66234027632604e-07
ENSG00000254087	1516.90776166175	1.76418700724877	0.299185905138378	5.89662473047588	3.71012329412921e-09	3.7056920805736e-07
ENSG00000176485	112.275591195997	-2.65579839837934	0.450447355034372	-5.89591296007652	3.72615361778106e-09	3.7056920805736e-07
ENSG00000175164	43.4849155720531	4.41024375189496	0.748894302417949	5.88900695018729	3.88523109530301e-09	3.8416897123384e-07
ENSG00000113389	236.313444655521	3.55205713358887	0.603744434512378	5.88337867902291	4.01974778639394e-09	3.95198632370901e-07
ENSG00000159674	525.558167659524	3.25253059701207	0.553702193636712	5.87415154642873	4.25014440396205e-09	4.1547576403504e-07
ENSG00000134765	134.036304499893	-4.51975569757795	0.769775088995004	-5.87152762176133	4.3179763227745e-09	4.19721935781555e-07
ENSG00000136158	277.648355041873	1.70330657990849	0.290399128267105	5.86539839176726	4.48055579211556e-09	4.33078440468248e-07
ENSG00000120149	65.2750189631463	-2.68150148677086	0.457456329736029	-5.8617649652333	4.57972960021271e-09	4.40191328333294e-07
ENSG00000037965	18.5766741947206	-7.88448160219142	1.34817551774362	-5.84826048123715	4.96740258034813e-09	4.74800896638276e-07
ENSG00000116962	558.932071304963	-1.98094400127009	0.339272627172166	-5.83879701047869	5.25790830188111e-09	4.98368481425455e-07
ENSG00000086619	122.480237937963	2.81716142875716	0.482526645669718	5.83835411793085	5.27190140188509e-09	4.98368481425455e-07
ENSG00000214041	19.6860201599537	8.28620721104569	1.4195100985977	5.83737108966779	5.30308956134971e-09	4.98577354661322e-07
ENSG00000157368	147.681072554149	1.97245933249164	0.338329344748926	5.82999779092588	5.54281096473919e-09	5.18282949175748e-07
ENSG00000133328	136.67704528674	-3.5579343140303	0.61087083707679	-5.82436433052876	5.73303878236258e-09	5.3317260675972e-07
ENSG00000110092	13396.3646344275	1.67892819525301	0.288368832650887	5.82215553539243	5.8093446799979e-09	5.37364382899806e-07
ENSG00000246223	27.2552296485357	-5.13315857514274	0.882691792782577	-5.81534644041619	6.05084375536329e-09	5.5670998294666e-07
ENSG00000138696	154.144561367255	2.57439842234158	0.444053889566281	5.79749098663691	6.73143975040181e-09	6.12774713786577e-07
ENSG00000133110	1879.7426683486	5.89723726353175	1.01706613521364	5.79828298215142	6.69973301777166e-09	6.12774713786577e-07
ENSG00000115267	1676.74284206195	-1.61749428383241	0.279473906972447	-5.78763971690523	7.13823085317372e-09	6.46385588572915e-07
ENSG00000125675	208.420838367519	4.00744452691109	0.693511014166126	5.77848721224654	7.53752716556295e-09	6.78969397295867e-07
ENSG00000245694	209.961037291448	-2.75455663175244	0.477424543802147	-5.76961672270871	7.94520303984898e-09	7.11964678648967e-07
ENSG00000089127	3747.86268054728	-1.88211305248958	0.32689637849122	-5.75752188255009	8.53577071205041e-09	7.60921943527603e-07
ENSG00000134323	21.7846804403996	5.32585287409558	0.927825553814597	5.74014463408476	9.45957252767713e-09	8.38927553292191e-07
ENSG00000003436	144.298517089892	2.56804381248434	0.448464214639277	5.7263070913026	1.02640353294546e-08	9.05603732529572e-07
ENSG00000111348	1469.17993888085	-1.75750495094139	0.307333421924241	-5.71856109868395	1.07429888179137e-08	9.43026135776558e-07
ENSG00000179930	59.8209439140343	3.73128895208061	0.654310654684363	5.70262600091782	1.17975643735533e-08	1.03020685288167e-06
ENSG00000181458	1176.78326015006	-3.03540052711653	0.532359669819692	-5.70178527638018	1.18559114716984e-08	1.03020685288167e-06
ENSG00000153802	3982.47563395989	1.76864235766813	0.311291388158398	5.68162957584991	1.3341737724208e-08	1.15349043992462e-06
ENSG00000026559	548.84475926345	-2.03321980930017	0.358052398356852	-5.67855380561862	1.35838305794195e-08	1.16854902559456e-06
ENSG00000077092	106.785215668316	4.339737837452	0.765239891129127	5.67108156247399	1.4189881762869e-08	1.21461152104557e-06
ENSG00000139629	1144.59366914379	-2.55493419385851	0.450854306856257	-5.66687321160067	1.45426869434553e-08	1.2386481626839e-06
ENSG00000250426	28.9672882375063	3.66464141918905	0.647152522138571	5.6627167380557	1.48995002948714e-08	1.25659756163364e-06
ENSG00000147168	33.3341755987614	4.96666972550646	0.877013350427823	5.66316319253706	1.48607703764281e-08	1.25659756163364e-06
ENSG00000171345	40186.7807879291	2.52129395235117	0.446026187585226	5.65279354111781	1.57860881677986e-08	1.32487632647305e-06
ENSG00000108309	194.821667137284	-2.24820333358707	0.397851378104795	-5.65086224985976	1.59644989823422e-08	1.33334565529708e-06
ENSG00000137965	1934.16747363156	-2.97728269849205	0.527834062842181	-5.64056567789608	1.69492401228901e-08	1.40197921304964e-06
ENSG00000146373	990.701485038096	-1.29986770680772	0.230426536326893	-5.64113720376231	1.68930676473149e-08	1.40197921304964e-06
ENSG00000076067	2104.89880333309	1.25478443582798	0.223328009166561	5.61857171660069	1.92542473242052e-08	1.5850206947988e-06
ENSG00000131620	93.34783004396	2.66272615124555	0.475325701968208	5.60189810948545	2.12017178286669e-08	1.73702645353435e-06
ENSG00000010030	64.8688943672165	-2.50065728916091	0.447165930414617	-5.59223572073632	2.2416420158677e-08	1.82784127407601e-06
ENSG00000236130	20.9254719355471	7.38324685499837	1.32107422220461	5.58882062105275	2.28616956864287e-08	1.85535601077833e-06
ENSG00000161682	251.990362403011	1.59064097898539	0.285249143573959	5.57632166412787	2.45657502766783e-08	1.97501744630958e-06
ENSG00000228314	85.9510144693561	4.81898609814548	0.864079335137937	5.57701810722762	2.44676409532553e-08	1.97501744630958e-06
ENSG00000105855	6352.67359999852	2.06504134199298	0.370535488461131	5.57312701833041	2.50207003819814e-08	2.00223790731158e-06
ENSG00000198959	2080.02547014498	2.49702224050213	0.44825010247295	5.57060049005301	2.53862842690299e-08	2.02208805948453e-06
ENSG00000166828	312.63566452695	-2.79390323324301	0.502166395579264	-5.5637001158155	2.64113667817659e-08	2.0940440805543e-06
ENSG00000268460	58.5972435575991	-2.94328711256467	0.529291583822171	-5.56080467274829	2.6853361193326e-08	2.1193214648219e-06
ENSG00000119917	2019.28174483645	-2.71554690212026	0.489091042833153	-5.55223192473518	2.82045046235081e-08	2.21579224679204e-06
ENSG00000113657	101.838235441554	4.77416864655304	0.860356169335708	5.54906074566681	2.87208382246068e-08	2.24610009842891e-06
ENSG00000206072	188.967625086343	2.61195570455767	0.470894609482117	5.54679465842741	2.90954104429153e-08	2.26509745099709e-06
ENSG00000170558	47.4533333574703	4.42491393391999	0.799058526615693	5.53765936603059	3.06540721972806e-08	2.37569059528925e-06
ENSG00000245848	256.169759246203	-2.21645653133275	0.401817557987865	-5.51607685446061	3.46650712834885e-08	2.67449574633372e-06
ENSG00000156966	487.863243974026	2.0059796407042	0.364757794915116	5.49948395529426	3.80904363697699e-08	2.92565159706201e-06
ENSG00000008394	2932.08962770277	-2.40338941376937	0.438046873177671	-5.4866032859332	4.09735892661315e-08	3.13198309807981e-06
ENSG00000141934	355.78698196992	1.93753034296695	0.353184753158763	5.48588331075549	4.11408416254598e-08	3.13198309807981e-06
ENSG00000198948	76.6130196743013	-2.15001552358175	0.392665687942779	-5.47543518468834	4.36437690627422e-08	3.27900020403703e-06
ENSG00000072682	1796.99985471484	1.20299255751028	0.219678575545966	5.47614875287901	4.34682322145706e-08	3.27900020403703e-06
ENSG00000186469	59.9415650899093	3.50102734893825	0.639397165017644	5.4755127806074	4.36246473136791e-08	3.27900020403703e-06
ENSG00000147852	1656.61261878774	1.32236990941531	0.241695624778258	5.47121988918298	4.46948332660721e-08	3.34336785366422e-06
ENSG00000197093	84.8602647241428	-2.09257196856739	0.383261790088262	-5.45990240270363	4.76396393644441e-08	3.5482250877284e-06
ENSG00000170017	3930.89887863111	2.12604383833644	0.390586887590396	5.44320330734195	5.23308616151478e-08	3.86754894356166e-06
ENSG00000105991	131.54029107444	-1.7443449050504	0.320472087359391	-5.44304784676681	5.23765709880772e-08	3.86754894356166e-06
ENSG00000133135	280.97158882934	2.15738600488723	0.396673704926905	5.43869174611605	5.3673224936301e-08	3.94635826935495e-06
ENSG00000109819	29.4090006731025	4.67983160083907	0.862468242845269	5.42609149920742	5.7601438828601e-08	4.21716065977055e-06
ENSG00000136514	166.231196525709	1.99638390253547	0.369039519851946	5.40967510291687	6.3139189716201e-08	4.60300745367474e-06
ENSG00000111331	4640.45478766356	-2.26971643753979	0.419949186071013	-5.40474065154155	6.49022319101939e-08	4.71157341778433e-06
ENSG00000172201	179.383516970358	3.18746091013819	0.590769232572721	5.39544162829406	6.83552127668815e-08	4.94139258678234e-06
ENSG00000016082	36.7941608670804	-3.61560123398884	0.67123617935821	-5.38648145790626	7.18503377698458e-08	5.17232243234392e-06
ENSG00000115415	7216.64334111275	-1.68338817589979	0.312640972896466	-5.38441318264853	7.26813737629863e-08	5.20058426750071e-06
ENSG00000111249	111.733479928655	6.38834585286196	1.18654213226729	5.384002539088	7.2847475063509e-08	5.20058426750071e-06
ENSG00000174502	645.971877950345	6.2957448126153	1.17078024849285	5.37739240196428	7.55723481608159e-08	5.37281921531751e-06
ENSG00000110031	282.918484719886	2.1494997328246	0.400864534291156	5.3621599042817	8.22326944045586e-08	5.82227780753264e-06
ENSG00000106006	16.1117180129543	-7.79877191699121	1.45525041069478	-5.3590583858814	8.36568184462664e-08	5.89883426790169e-06
ENSG00000176170	1389.40966797494	2.0222126545864	0.377674976510926	5.35437288768295	8.58536488169657e-08	6.02902868528937e-06
ENSG00000116117	116.697057666985	1.82156036366149	0.34029025858579	5.35296064962807	8.65266711861306e-08	6.0515909664934e-06
ENSG00000148908	476.272627191865	1.69478808026369	0.316876462897382	5.34841895408476	8.8725891036679e-08	6.18027917119863e-06
ENSG00000126368	970.499464670668	1.02822369747212	0.192909013752694	5.33009669931899	9.81604864543738e-08	6.80988374777219e-06
ENSG00000129993	155.830308936645	2.83924020761967	0.534827047176794	5.30870722153496	1.10405514506997e-07	7.628621996357e-06
ENSG00000146072	6609.31540307711	1.92188859475879	0.362186937246506	5.30634431315989	1.11845601989048e-07	7.69721432888632e-06
ENSG00000272899	302.623632767869	3.0299350782871	0.571214668790448	5.30437197052907	1.13061561015791e-07	7.74989704094294e-06
ENSG00000177706	408.04977599983	1.94104880132145	0.366788765467562	5.29200723704585	1.2098110363743e-07	8.25984082572214e-06
ENSG00000109472	167.61216976357	1.70109902778732	0.321613195627105	5.28927000171865	1.22805497017598e-07	8.35125919441811e-06
ENSG00000186007	117.56175453148	2.60496088869974	0.492639521835239	5.2877627012048	1.23821462597147e-07	8.38719788970045e-06
ENSG00000244694	82.4636326101817	2.29540521109231	0.434580040797637	5.2818928519572	1.27855971170179e-07	8.62651758424675e-06
ENSG00000198759	65.1525302692372	4.3697014580148	0.828510658939252	5.27416444298901	1.33362287507081e-07	8.96288342405991e-06
ENSG00000131018	74.4593061778214	-1.92219742602473	0.365298239273672	-5.26199477404179	1.42500818130343e-07	9.5397921242512e-06
ENSG00000135299	98.667904536457	2.08999798178062	0.397348144640879	5.25986596381255	1.44160445855384e-07	9.61349019744917e-06
ENSG00000157601	6644.45692604949	-2.43297830908207	0.462807765870773	-5.25699542768998	1.46427951696659e-07	9.72699964842095e-06
ENSG00000233377	22.3069310360345	6.68539977921918	1.27194877973324	5.25602908367211	1.47199022028832e-07	9.74061220771557e-06
ENSG00000056998	30.742862310968	3.71875606379351	0.709318515567942	5.24271675160763	1.58229344861643e-07	1.04304056641554e-05
ENSG00000168916	343.024183802373	2.56644759799245	0.490428878659009	5.23306785075532	1.66719505152294e-07	1.0948126282997e-05
ENSG00000162817	48.7159182040375	2.35327378050429	0.451474263800726	5.21242066091056	1.86392292918173e-07	1.21934577933733e-05
ENSG00000015532	1007.8320319836	1.09755969487146	0.210657698655494	5.21015705514942	1.88680841982375e-07	1.22964162360105e-05
ENSG00000138646	99.3042708233033	-3.4799392349776	0.668553634802926	-5.20517585100469	1.93812982996332e-07	1.25359111746312e-05
ENSG00000165215	41.3047689970491	3.86731843899489	0.742934878235354	5.20546087186091	1.9351572155394e-07	1.25359111746312e-05
ENSG00000267795	142.885336927303	-1.72077436904837	0.330860336399245	-5.20090860021352	1.98316616709748e-07	1.27791662565214e-05
ENSG00000254750	20.9281362235528	-4.34702078208746	0.83639083732688	-5.19735581511225	2.02143217438044e-07	1.29771420000804e-05
ENSG00000133466	785.631157250462	-1.1924391562843	0.229506804152641	-5.19565927767104	2.03995588287146e-07	1.3047375823347e-05
ENSG00000001561	162.235117404249	2.97829651109594	0.573680522881236	5.19155939988659	2.08540033156208e-07	1.32886343350095e-05
ENSG00000153551	435.646987423015	3.19317551167225	0.615920757048952	5.18439340633955	2.16719048685349e-07	1.37588606370163e-05
ENSG00000111335	5620.95102319279	-1.98674618188444	0.383666935157817	-5.17830962177445	2.23905405003005e-07	1.41628400480761e-05
ENSG00000126803	1164.05394508811	1.30045870651596	0.251763232862615	5.16540358863918	2.39920671283607e-07	1.51202752726537e-05
ENSG00000011028	1715.20222458194	1.45913758472812	0.282588231829309	5.1634761125137	2.4240552833728e-07	1.52211208578208e-05
ENSG00000170458	589.211785706818	-1.84066638881538	0.357149585955787	-5.15376878819411	2.55302695071377e-07	1.59289950957575e-05
ENSG00000108582	4517.9839506204	1.62962016936122	0.316209962493576	5.15360160227185	2.55530522896197e-07	1.59289950957575e-05
ENSG00000144278	10.0508929297454	7.4052086292729	1.43857397204588	5.14760364998229	2.63835225155571e-07	1.63873106454931e-05
ENSG00000096060	4114.6297870278	-1.60680522183636	0.312592218488331	-5.14025982350657	2.74358817073333e-07	1.69796526897363e-05
ENSG00000249641	31.0067405165286	-3.59599878930621	0.700300466409393	-5.13493701888241	2.82238524422603e-07	1.74047090060605e-05
ENSG00000148734	30.9161388977863	-4.25764697820291	0.82934604267982	-5.13374003021153	2.84040373925503e-07	1.74532665478153e-05
ENSG00000158186	204.599230428695	1.61214731658976	0.31459894548661	5.12445238523017	2.98403744126332e-07	1.82705922337849e-05
ENSG00000067066	2489.80424237122	-1.23601632856693	0.241320718889302	-5.12188234087728	3.025006310375e-07	1.8455756585107e-05
ENSG00000153707	22.4600656565704	4.33800472239594	0.849143427886448	5.10868315049368	3.2441184567391e-07	1.97226353527195e-05
ENSG00000164251	1868.33502525603	-1.67664574672738	0.32850496980074	-5.10386721925203	3.32781810945343e-07	2.01602502018121e-05
ENSG00000128342	186.130251927981	2.76962433995026	0.543019214002856	5.10041683338243	3.38906273858789e-07	2.04592366376858e-05
ENSG00000011677	28.0887959365955	5.47208612874123	1.07359681311484	5.09696569689418	3.45140839395307e-07	2.07627557405463e-05
ENSG00000168453	1223.93737529053	-1.85659909813135	0.365157038166033	-5.08438535775169	3.68818453394219e-07	2.2109830977866e-05
ENSG00000182704	2083.15392488351	1.05152277906269	0.206843081424324	5.08367392238547	3.70203273621794e-07	2.2115789314802e-05
ENSG00000151092	559.998546125361	-1.18818780443186	0.233769269269337	-5.08273738522445	3.72033910956416e-07	2.21482471903292e-05
ENSG00000179388	36.3009599441751	-3.53584115060161	0.696007189903013	-5.08017905834323	3.77079279120797e-07	2.23712034388735e-05
ENSG00000198643	1146.40257129127	2.36181959862263	0.46576630426117	5.07082538392103	3.96094073387162e-07	2.3418551658509e-05
ENSG00000111962	162.727171487746	-1.82153220278548	0.35934206757313	-5.0690758671465	3.99751874961705e-07	2.3553873317521e-05
ENSG00000197416	48.2656691562007	3.37919118337844	0.668482216855535	5.05502031044861	4.30344968387333e-07	2.52699152938705e-05
ENSG00000138771	610.33913352821	2.77561111317409	0.549758608460676	5.04878153876627	4.44636837963617e-07	2.58445162066352e-05
ENSG00000145569	176.028623883664	-2.54706650225661	0.504462334472234	-5.04907171101553	4.43962073309774e-07	2.58445162066352e-05
ENSG00000165449	572.463299988342	2.22864376744801	0.441322810390462	5.04991746399017	4.42000995575279e-07	2.58445162066352e-05
ENSG00000152931	82.0513180954263	3.2876573810288	0.653140093655495	5.03361746272294	4.81309666490099e-07	2.78819286598052e-05
ENSG00000048052	164.409973857302	2.08977162733063	0.415339527710238	5.03147783417464	4.86713389525798e-07	2.81003485462797e-05
ENSG00000173267	850.215304825299	-1.40911397645785	0.280119949410726	-5.03039494124615	4.89470535347309e-07	2.81650185974932e-05
ENSG00000188373	1251.98990305781	-1.08387676171543	0.215604128216533	-5.0271614494639	4.97793240311758e-07	2.85484423318793e-05
ENSG00000185761	241.847221615699	1.44214888091542	0.287197451764902	5.02145430627273	5.12817044109228e-07	2.93123496475059e-05
ENSG00000162105	252.472270496075	2.14220334129492	0.426750372756539	5.01980426509679	5.17241569347796e-07	2.94673549689697e-05
ENSG00000163644	463.074758900932	-1.7463609341835	0.348349978320577	-5.01323681029877	5.3521958827596e-07	3.03909340471548e-05
ENSG00000074416	4229.09349582165	2.28326276393157	0.455704207206034	5.01040527567315	5.43155283890205e-07	3.04759604592268e-05
ENSG00000153064	31.4341315330805	4.3021904758587	0.858690462724232	5.01017614916767	5.43802374948132e-07	3.04759604592268e-05
ENSG00000158528	16.4992474803122	5.70241639247824	1.13800709488295	5.01087947352803	5.41818428277127e-07	3.04759604592268e-05
ENSG00000111057	2719.91896392262	1.25339366647454	0.250103938172488	5.01149112498229	5.4009874892278e-07	3.04759604592268e-05
ENSG00000250742	16.4419740046626	-6.90081094404733	1.37902948016195	-5.00410690512355	5.61216071793591e-07	3.12482929294781e-05
ENSG00000136111	475.633565597816	-1.00680781874615	0.2011758395553	-5.00461596666729	5.59735073451641e-07	3.12482929294781e-05
ENSG00000128487	1152.60047063877	1.13817904721169	0.227541841096702	5.00206485860319	5.67195002325961e-07	3.14793226290908e-05
ENSG00000115956	12.2797842955653	7.66274357037553	1.53270352829596	4.99949496357909	5.74806736323297e-07	3.17892742837531e-05
ENSG00000165794	247.428527461655	-1.56972674209449	0.314012165103687	-4.99893608126985	5.7647506983615e-07	3.17892742837531e-05
ENSG00000285976	291.878587429981	-0.947411980597798	0.190080827860058	-4.98425849289389	6.21998805990089e-07	3.41900621631293e-05
ENSG00000177707	62.6817609809525	3.41735844187035	0.686908407578843	4.97498415242226	6.52529780539245e-07	3.56737516656316e-05
ENSG00000112796	23.9918365112081	5.42453015245829	1.09040082075591	4.97480380535463	6.5313756318942e-07	3.56737516656316e-05
ENSG00000121236	516.348094136249	1.18934702571741	0.23919773145025	4.97223371854921	6.61858450381759e-07	3.60356792367663e-05
ENSG00000000003	2393.76612864262	1.40908083537171	0.283486179529015	4.97054508164301	6.6764934840364e-07	3.62362998084689e-05
ENSG00000123407	10.2076388058631	-7.37445405163024	1.48545778745465	-4.96443191715765	6.89024511253011e-07	3.72788261512832e-05
ENSG00000158966	114.161177134794	-1.92027928452568	0.387469526722964	-4.95594918332417	7.19780280933536e-07	3.88207515155533e-05
ENSG00000117266	684.430402055346	1.67336403920886	0.338388503785676	4.94509719002959	7.61058848408981e-07	4.09188046464891e-05
ENSG00000249116	26.8369177527351	-3.50852110711812	0.710569296237407	-4.93761991363316	7.90817806376659e-07	4.23863562576649e-05
ENSG00000164749	18.4317605474631	6.45387765054785	1.31072893930348	4.92388430362835	8.484301019921e-07	4.53330431825282e-05
ENSG00000123612	46.3277061078496	3.85568705389111	0.783591900518457	4.92052948906188	8.63103940735817e-07	4.58923859318572e-05
ENSG00000104783	186.103361969405	1.45652262288182	0.296024722767261	4.92027358142974	8.64233248585976e-07	4.58923859318572e-05
ENSG00000006625	673.416343333544	-1.26581277467893	0.257502245456491	-4.91573489945668	8.84500227516314e-07	4.68240812751328e-05
ENSG00000266729	60.6229777989378	2.34011639613189	0.476265524555697	4.91347006129607	8.9478401565257e-07	4.72231870837499e-05
ENSG00000152952	1894.69949015534	1.90766956988016	0.388552488222586	4.90968306137146	9.12237075680151e-07	4.79970608167492e-05
ENSG00000156299	1938.4812365044	-1.3087981632291	0.266828671222473	-4.90501323277164	9.34210409713012e-07	4.90033234729036e-05
ENSG00000164176	12.9548345927296	6.75856464489817	1.38641560773467	4.87484748959319	1.08892548357293e-06	5.65979092478221e-05
ENSG00000104447	984.170811601265	1.12013988584788	0.229782798231954	4.87477693920828	1.08931470534188e-06	5.65979092478221e-05
ENSG00000198535	225.579776021186	2.78496748559236	0.571425128278004	4.87372246646711	1.09514814049829e-06	5.65979092478221e-05
ENSG00000125845	508.194861672429	1.43512033707507	0.294464040789664	4.87366923725733	1.09544340479656e-06	5.65979092478221e-05
ENSG00000159216	2943.14173086478	1.41167387318756	0.289593195327218	4.87467901858838	1.08985514875051e-06	5.65979092478221e-05
ENSG00000106004	106.71461083411	-5.77270338171172	1.18520327299416	-4.87064414455103	1.11235017596626e-06	5.72993556212558e-05
ENSG00000141448	57.6162145402323	2.67294094386386	0.548901907653673	4.86961496506646	1.11815913354027e-06	5.74266504255532e-05
ENSG00000084628	16.4356930389621	-3.6225432957855	0.744260599324133	-4.86730494543867	1.13130397117597e-06	5.7586049775392e-05
ENSG00000136689	29643.269507139	1.80916945353422	0.371678619578521	4.86756396046077	1.12982271429199e-06	5.7586049775392e-05
ENSG00000178690	12.3827126190264	7.66297307821301	1.57417392287867	4.86793293094313	1.12771586577525e-06	5.7586049775392e-05
ENSG00000238042	17.7559208138153	3.81579818985135	0.784121134126299	4.86633764067981	1.13685233826574e-06	5.7697771327027e-05
ENSG00000280693	157.271790206397	-2.09329516585772	0.430324536431566	-4.864456912488	1.14771505296054e-06	5.80777573123122e-05
ENSG00000059378	1238.56651408045	-1.11751722919692	0.229900060527151	-4.86088270979354	1.16863482080656e-06	5.89629386861493e-05
ENSG00000148082	63.0784066015303	3.02251247821379	0.622089955177234	4.85864215144364	1.18193534693964e-06	5.94596422342001e-05
ENSG00000175928	35.4244239654581	4.63866032536293	0.955869295697182	4.85281862932906	1.21719000098617e-06	6.10546762885336e-05
ENSG00000138496	3433.62352767495	-1.19055057507433	0.245502837601133	-4.84943712548287	1.23812305905434e-06	6.19241489274127e-05
ENSG00000154065	350.71562133632	-2.04607223741345	0.422315086818937	-4.84489496414955	1.26678677795034e-06	6.31741058395235e-05
ENSG00000104044	16.7806054051147	7.19289633361146	1.48576116030122	4.84121979077255	1.29044545095763e-06	6.41679594905377e-05
ENSG00000176971	66.2111664266021	3.26976520228424	0.675763643704454	4.83862254613135	1.30742073115111e-06	6.48247080099564e-05
ENSG00000187608	2526.02644000111	-2.49647007501003	0.516463356624817	-4.83377967282117	1.33964850756366e-06	6.58859514799877e-05
ENSG00000160145	321.035039282255	2.18618307483892	0.452281204549299	4.8336810215615	1.34031287521044e-06	6.58859514799877e-05
ENSG00000183741	993.204655874606	1.0695585982822	0.221231225363417	4.83457340402667	1.33431463260569e-06	6.58859514799877e-05
ENSG00000161896	23.385284812942	6.36534722991639	1.31738583422863	4.83180178845894	1.35302926276675e-06	6.62744358746375e-05
ENSG00000151474	117.142483674236	-1.91662288823084	0.396703236997363	-4.83137698279882	1.35591987375021e-06	6.62744358746375e-05
ENSG00000164920	132.276664334474	-1.84852273205718	0.382731854701164	-4.82981154913405	1.36662329991314e-06	6.66083679178629e-05
ENSG00000232079	15.153138713924	7.04099655935165	1.45885464588654	4.82638663091268	1.39032477515129e-06	6.75721405550223e-05
ENSG00000105141	2044.49255091445	-6.97938421363936	1.44710345803383	-4.82300292691041	1.41412894922156e-06	6.85354607643856e-05
ENSG00000161714	2784.62614166411	1.16910079543651	0.242547055672986	4.82009889665596	1.43487072749725e-06	6.93453676027813e-05
ENSG00000159348	2473.61684360734	-1.24637448261596	0.258763402743803	-4.81665671961337	1.4598351560804e-06	7.03542405052193e-05
ENSG00000185008	26.7564413145889	4.85646685455682	1.00895587104863	4.81335903175766	1.48414303198127e-06	7.13259242045749e-05
ENSG00000283167	16.0756274456347	-7.37860247808683	1.53350206006691	-4.81160258615167	1.4972484863895e-06	7.1755320914572e-05
ENSG00000115738	238.856989309676	2.83188247317837	0.588901352969769	4.80875525059923	1.51873015037319e-06	7.2582645103252e-05
ENSG00000110911	1858.18125622736	0.990457064808384	0.206207268786786	4.80321120897294	1.56141029745997e-06	7.44156902155093e-05
ENSG00000172331	1342.56215610833	1.27305417179663	0.265080526764997	4.80251864342052	1.56682225850198e-06	7.44673396616756e-05
ENSG00000162909	15148.6434384265	0.77039242098451	0.160512562591018	4.7995771081635	1.59001010870675e-06	7.53612229209355e-05
ENSG00000125813	465.321053605306	10.3968382745174	2.16947919402913	4.79231988171711	1.64863762960171e-06	7.79253033442238e-05
ENSG00000055732	25.8638088355796	-3.23142464915073	0.674462679208926	-4.79110964737271	1.65861449913457e-06	7.81820889249595e-05
ENSG00000170153	41.3340690359378	4.02699437645581	0.841115522298524	4.7876828684022	1.68717979146924e-06	7.93112795416074e-05
ENSG00000137959	2550.89179718993	-5.29907747623265	1.10822222673802	-4.78160187404845	1.73903834325072e-06	8.15263070725575e-05
ENSG00000149212	3573.1492368117	1.70012579624755	0.355622931483227	4.78069788457312	1.74687713966844e-06	8.16712532282486e-05
ENSG00000157765	1736.04251488723	9.31976927361035	1.95034201685424	4.77853073618464	1.76580773092848e-06	8.21308649432037e-05
ENSG00000187546	12.8146482757098	6.79145473949392	1.42125844288131	4.77847978565085	1.7662551600689e-06	8.21308649432037e-05
ENSG00000121440	509.882527482126	4.1637699881123	0.872422220634189	4.77265467296963	1.81813380282961e-06	8.43153425274486e-05
ENSG00000253368	2524.27538216845	2.04310657194727	0.429170148073284	4.76059805445367	1.93020127005898e-06	8.9271808740228e-05
ENSG00000164199	99.9691253431208	4.02517015634427	0.847135709871872	4.75150570261413	2.01907463973636e-06	9.3131847658617e-05
ENSG00000117472	5554.02532143327	2.06539537979035	0.435902694674402	4.73820282605296	2.15621941638546e-06	9.91918584462882e-05
ENSG00000069966	498.968495904966	-0.916293308311928	0.19357707199831	-4.73348056592118	2.20702104213897e-06	0.000101258125413336
ENSG00000035664	439.691457998621	-1.88901801582029	0.399225852449428	-4.7317026295525	2.22644415528924e-06	0.000101877584286573
ENSG00000104490	101.381278435089	2.15843133452897	0.456675472209984	4.72640083795983	2.28534314137139e-06	0.000104295301716962
ENSG00000155792	292.065906347902	1.44259668914427	0.3055225581751	4.72173543505583	2.33840736022731e-06	0.000106434652467489
ENSG00000141485	380.586020292194	3.19216690443972	0.676571069312426	4.71815460227082	2.37993609029843e-06	0.000108039051275948
ENSG00000145358	47.1113705564578	1.85357662036487	0.392950258526701	4.71707698402982	2.39257176477876e-06	0.000108138165685274
ENSG00000165188	17.6495219765922	4.98494842420521	1.05682794476763	4.71689686943436	2.39468998117347e-06	0.000108138165685274
ENSG00000100097	2848.83315666806	1.89877320745861	0.402619561489194	4.71604807385787	2.404696398822e-06	0.000108305763198252
ENSG00000254369	9.62411645501525	-6.94339837603091	1.47268361408128	-4.71479298719739	2.41956616196168e-06	0.000108690955134597
ENSG00000177551	192.134869869236	3.24806263743639	0.690940232065488	4.70093140723138	2.58977504117061e-06	0.000116034061414949
ENSG00000183196	141.73315825601	2.47826851281623	0.527408266065044	4.69895652433819	2.61494107178708e-06	0.000116857301662589
ENSG00000163399	22140.3191207701	-0.943275831299513	0.201043570252921	-4.6918975330215	2.70682697093223e-06	0.000120650150349453
ENSG00000126391	3041.50789165216	-1.09106113498192	0.232592560492685	-4.69086858440697	2.72047670649344e-06	0.000120945224122015
ENSG00000157111	97.8865525217932	2.49851668027934	0.53292930547488	4.6882703852305	2.75523828510717e-06	0.000122174934781621
ENSG00000167601	175.95093571708	1.28307367615179	0.273965753017105	4.68333600832103	2.82243276312989e-06	0.000124832790975963
ENSG00000105143	10.4941906336589	-7.31977534436356	1.56333581496864	-4.68215163644184	2.8387935618219e-06	0.000125234469823451
ENSG00000107242	58.1442123450514	2.03543888182662	0.435038800001851	4.6787525200464	2.88625554117597e-06	0.000127002625539469
ENSG00000118523	318.444467715527	1.61999180909857	0.346691100062631	4.6727239574535	2.97231129316935e-06	0.000130455652548415
ENSG00000170989	44.3877990656748	-3.9755531985644	0.851154014854875	-4.67078005764003	3.00058084285794e-06	0.000131361306364811
ENSG00000277559	19.3953343714474	-4.06487446976062	0.870965620145504	-4.66708946454344	3.0549633359201e-06	0.000133402650239861
ENSG00000258689	120.940568549975	1.56605969771294	0.336144481159686	4.65888861929278	3.17921153350192e-06	0.000138476796035191
ENSG00000172602	187.463262066814	2.21321533369735	0.475606367752632	4.65346026411586	3.26410529025422e-06	0.000141815483633393
ENSG00000117152	18.7369153479813	3.28989980719217	0.707596776312696	4.64939908903475	3.32903509302843e-06	0.000144272163162605
ENSG00000196975	3591.68053934742	-1.12840535415099	0.242962327577829	-4.64436345091206	3.41126577155793e-06	0.000147304057742352
ENSG00000166510	148.179389652271	2.19845961815914	0.473390722375427	4.64406992838281	3.41611851433876e-06	0.000147304057742352
ENSG00000110811	149.212514139557	2.32610041933143	0.501270578933511	4.64040882726526	3.47720565717559e-06	0.000149563308329265
ENSG00000128510	446.390872051077	-2.99760563581263	0.646871991141429	-4.63400128134045	3.58664771635006e-06	0.000153885969974571
ENSG00000205189	82.7474226786376	3.3346690601464	0.720003809943015	4.63146029798137	3.63095630711756e-06	0.00015539951060686
ENSG00000087258	47.7107325024884	-3.65561159200292	0.790699432120904	-4.62326320659852	3.77749907862394e-06	0.000161270152972022
ENSG00000110195	11.1074052401158	6.51462077447737	1.40998560834967	4.62034558076267	3.8310139035042e-06	0.000163149985667796
ENSG00000136694	1259.59847054594	7.16186885482596	1.55121632224269	4.61693752968742	3.89444439807964e-06	0.00016544176757768
ENSG00000020633	32.1703963862204	4.16595511185181	0.902434158653326	4.61635352773939	3.90541435738453e-06	0.000165447286206474
ENSG00000182158	4069.20235873753	1.05631159417604	0.228841571063179	4.61590780586106	3.91380677047573e-06	0.000165447286206474
ENSG00000136717	317.141656268957	2.15154656622633	0.466601972743363	4.61109616313112	4.00551178319105e-06	0.000168908897622064
ENSG00000184979	245.665075670403	-2.08376161526679	0.452055120032571	-4.60952995094194	4.03580391854579e-06	0.000169770186842495
ENSG00000088386	283.445124699539	-1.70713209617841	0.372186064576153	-4.58677059315076	4.50154847846275e-06	0.000188900345297443
ENSG00000166348	1228.10611349255	1.21146834294347	0.265171911400354	4.56861489041503	4.90957923498955e-06	0.000205521437318723
ENSG00000064886	42.1442610611666	2.47900228456709	0.542723132750459	4.56771074415751	4.93079829801739e-06	0.000205908700770362
ENSG00000139055	68.7726154725445	-2.87740599162161	0.631467528112859	-4.55669668434216	5.19643792615969e-06	0.000216476306342803
ENSG00000178573	2660.72632291554	1.39731422239896	0.306931025453827	4.55253495580286	5.30033506106455e-06	0.00022027117083482
ENSG00000131773	136.647206711492	3.08609525315246	0.678324570256727	4.54958494572069	5.37518322670155e-06	0.000222843439555181
ENSG00000253293	146.370210787797	-4.9522306556372	1.09033416312926	-4.54193844703931	5.57393173823529e-06	0.00023052763354889
ENSG00000158246	1234.97522854907	1.11439720920295	0.245856105601914	4.53272131060012	5.82286173837664e-06	0.00024024541057259
ENSG00000079393	14.526569654699	-5.02825382746519	1.1132171954852	-4.51686683232879	6.27613467802156e-06	0.000258327505108519
ENSG00000127152	442.522950894294	-1.70595304903408	0.377978991107138	-4.51335415240188	6.38103358032493e-06	0.000261801330413311
ENSG00000197119	415.980515990591	1.54525324160775	0.34239859794268	4.51302444254294	6.39096534574779e-06	0.000261801330413311
ENSG00000129595	880.286672372167	-1.33417698904417	0.295987577558025	-4.50754386400766	6.55823755969088e-06	0.000268015385307557
ENSG00000165238	19.5392520089835	3.57005681935087	0.792691575856504	4.50371484709349	6.67757929954596e-06	0.000272245857461347
ENSG00000085831	544.842981259183	-1.29521410295074	0.287818779163713	-4.50010283107349	6.79205975940658e-06	0.000276258600852459
ENSG00000120457	53.4499790518592	2.46669265068077	0.548240888413561	4.49928617659039	6.81820207381902e-06	0.000276667845943529
ENSG00000138166	1883.89626588653	1.6052909016047	0.357125598643691	4.49503174149755	6.95595701836879e-06	0.000281206650870837
ENSG00000205622	35.0908103665313	-2.80192579610243	0.623367162687898	-4.49482418037678	6.9627453223468e-06	0.000281206650870837
ENSG00000171992	1554.33835754967	1.24231166792997	0.276703355313442	4.48968776154779	7.13276506206409e-06	0.000286894092506743
ENSG00000105963	121.709865022102	1.45681817456692	0.32448991663267	4.48956377345949	7.13691784904888e-06	0.000286894092506743
ENSG00000230978	15.9024375815191	4.24255173795756	0.945121374188197	4.48889619240879	7.15931720417275e-06	0.000287123665496019
ENSG00000139679	2090.6711706986	1.35750233228461	0.302691735924783	4.48476840022465	7.29931734716432e-06	0.000292057569669679
ENSG00000138061	907.065394279854	1.91754909923387	0.42771157158365	4.48327617635858	7.35056965110199e-06	0.00029342587203529
ENSG00000151150	889.3609598471	-0.816995778851921	0.182399642474786	-4.47915230406694	7.49400505566376e-06	0.000298459159682164
ENSG00000127418	380.502098328375	1.2920428530668	0.289120079862194	4.46887969068991	7.86303386148965e-06	0.000312039857442827
ENSG00000134533	36.9911646739744	-3.98452905193187	0.891661707301651	-4.46865556668332	7.87127568324247e-06	0.000312039857442827
ENSG00000111666	118.592777493325	1.79113709926489	0.401100879372406	4.46555266113465	7.98623245655718e-06	0.00031514479223639
ENSG00000161544	91.5517947555953	2.37177025528271	0.531125467062769	4.46555550875593	7.98612622549338e-06	0.00031514479223639
ENSG00000138604	717.227363129372	1.42181036902072	0.318592432762436	4.46278763338024	8.09002232465071e-06	0.000318509917838937
ENSG00000135547	11.2784457603402	6.61724422149335	1.4847270864247	4.45687580027115	8.31627517857035e-06	0.000326670124308911
ENSG00000102996	815.076876447197	1.38259608747985	0.31045067997052	4.45351283370079	8.44766562253768e-06	0.000331075369101961
ENSG00000117791	19.6430323706083	4.72713536945801	1.06465000319584	4.44008392924267	8.99238010817656e-06	0.000350136149236981
ENSG00000137752	954.704664570929	-0.820020903891087	0.184688578874906	-4.44001956637778	8.99506991936911e-06	0.000350136149236981
ENSG00000188508	2079.71631757189	-6.15573813513117	1.38622532775548	-4.44064757141489	8.96885755243792e-06	0.000350136149236981
ENSG00000146555	26.3643336073381	3.43242755531143	0.773193905071697	4.43928428922774	9.02585275441166e-06	0.000350541301669645
ENSG00000065809	1630.50921797583	1.52805034647487	0.344319318552514	4.43788734509192	9.08461419036289e-06	0.000352028799876562
ENSG00000118849	1836.7184426147	-5.43108554794754	1.22505508597603	-4.43333986375026	9.27844289453196e-06	0.000358086769055886
ENSG00000113269	439.306191258873	1.2616910304482	0.284597701918831	4.43324391568012	9.28257477471231e-06	0.000358086769055886
ENSG00000139971	30.723576558143	2.88578062354084	0.651151775337293	4.43180949947656	9.34455604435862e-06	0.000359671334995951
ENSG00000130513	5502.13764566392	2.4527926056771	0.554453376348984	4.42380317318738	9.69783798506785e-06	0.000372435943154224
ENSG00000136205	688.454117233183	1.37542410425296	0.310964255730892	4.42309390518263	9.72974255587754e-06	0.000372828999273659
ENSG00000148218	1557.72549505444	1.33639587513005	0.302432859658584	4.41881836728559	9.92420064690108e-06	0.000379435271399851
ENSG00000146411	216.664275410436	1.74981597606523	0.396275702265288	4.41565295591554	1.00705540858173e-05	0.000383327174881607
ENSG00000136810	6616.12310067828	1.11840706080118	0.253273137975689	4.41581396961463	1.00630600881575e-05	0.000383327174881607
ENSG00000023909	749.94453405789	1.50735399370353	0.341920430731554	4.40849349212178	1.04092147672622e-05	0.000395343355564559
ENSG00000080031	198.241638002139	1.06253987502176	0.241229035261862	4.40469313268337	1.05933726834672e-05	0.000401451491231394
ENSG00000047457	128.950978262038	7.72990181446591	1.75550162365816	4.40324389923272	1.06644157477407e-05	0.000403255544922809
ENSG00000105929	440.423749231241	1.97440299538943	0.448584877146665	4.40140338200457	1.07552959077511e-05	0.000405800144940476
ENSG00000183032	25.1477212895884	3.03845610189699	0.690624503263771	4.39957761060862	1.08461782776982e-05	0.000408333692052073
ENSG00000180891	1200.4407434124	1.52918777032715	0.34779186609961	4.39684742336435	1.09834494631142e-05	0.000412598794787946
ENSG00000166897	169.662607725279	3.00337338663059	0.683295557565396	4.39542355189855	1.1055696888152e-05	0.000414407984663735
ENSG00000125730	30053.1544596058	2.81092948982022	0.640849370583391	4.38625614512396	1.15318313884794e-05	0.000431315563127799
ENSG00000249326	7.93189816622034	-6.17914900187781	1.4102786200585	-4.38150937977169	1.1785996901103e-05	0.000439667448188175
ENSG00000258976	20.2518116885119	3.97295197072887	0.906831560366688	4.38113553207429	1.18062401082788e-05	0.000439667448188175
ENSG00000102312	660.405557507239	2.07746752569364	0.47471958557998	4.37619931597204	1.20766590835845e-05	0.000447799395545412
ENSG00000103089	98.7203155526227	2.29275511319286	0.52389303522295	4.37638021321881	1.20666455546522e-05	0.000447799395545412
ENSG00000108821	4765.81926571274	1.30789466864366	0.299169762958237	4.37174751790087	1.23256012303889e-05	0.000456047245524388
ENSG00000185518	40.4137166806577	-2.61105975338852	0.597335743705877	-4.37117614490886	1.2357904457096e-05	0.000456261257906302
ENSG00000170786	760.886595680167	1.82052228307138	0.416692940484277	4.36897798401765	1.24829348844406e-05	0.000459890566781159
ENSG00000171236	998.132043462836	1.53131464685629	0.350637446563267	4.36723077316841	1.25831755840599e-05	0.000462593025478099
ENSG00000112245	67.2767037945837	-2.12826970854615	0.488272439749004	-4.35877501019756	1.30792490521975e-05	0.000479804861285836
ENSG00000169991	2515.07268312242	-0.929867554899468	0.21342492886938	-4.35688351789759	1.31927430592427e-05	0.000480367153973863
ENSG00000198574	198.427646983195	-1.3022749602263	0.298872105285728	-4.3572984470441	1.31677661713009e-05	0.000480367153973863
ENSG00000255690	18.7331775851887	3.67914098804866	0.844486731602643	4.3566593178634	1.32062577058784e-05	0.000480367153973863
ENSG00000110777	57.6910741443319	2.13487498893048	0.4899654027936	4.357195379017	1.31739661932442e-05	0.000480367153973863
ENSG00000154227	2658.23125615698	-1.02145249062579	0.234544440694729	-4.35504882401054	1.33037262476004e-05	0.000482891582468279
ENSG00000171310	565.460524707524	1.66487068580498	0.382598097953409	4.35148709497171	1.35217281615323e-05	0.000489771227408766
ENSG00000250722	452.977286698986	2.81561226353496	0.64769479426475	4.34712813576213	1.37931646920036e-05	0.000498553358247734
ENSG00000167191	44.8941838995997	3.67378638857173	0.845221933043834	4.34653461410023	1.38305234138105e-05	0.000498855671561028
ENSG00000140853	225.381110373047	-2.31532273910162	0.53315649163378	-4.34267007048279	1.40761442834474e-05	0.000506652850202327
ENSG00000129682	8.38232393020325	6.8954621653521	1.58807622352089	4.34202216696144	1.41177285184735e-05	0.000507088766514274
ENSG00000185745	2277.00809877478	-3.86377099929207	0.889977988610304	-4.34142310117728	1.41562824427951e-05	0.000507414248808937
ENSG00000126709	9483.56956452501	-3.94247758106007	0.910931945497982	-4.32796061280387	1.50496373831585e-05	0.000538076364928264
ENSG00000080854	17.6901351600193	-4.39064323310071	1.01456763882994	-4.32760031471561	1.50742695667203e-05	0.000538076364928264
ENSG00000143995	1461.57321509164	1.29904362084814	0.300379702838051	4.32467176901268	1.52759138078641e-05	0.000544145128497518
ENSG00000225431	19.5880871012979	-2.63904918788395	0.610499400166231	-4.32277113976749	1.54081544453376e-05	0.000547721688495936
ENSG00000055332	3885.42314787921	-1.09270577063644	0.252879984283064	-4.32104491675902	1.55292055353076e-05	0.000549753047808575
ENSG00000110852	209.117272580335	-2.01766578134147	0.466921482988158	-4.3212099996535	1.55175900351118e-05	0.000549753047808575
ENSG00000138670	233.383163873618	1.78440521606983	0.413111468007052	4.31942793715754	1.5643417915895e-05	0.000552659148342861
ENSG00000106415	186.32284721333	1.47465110292936	0.341593498793908	4.31697648853396	1.58180999849417e-05	0.000557685266887137
ENSG00000162896	769.192599829757	6.32671477499343	1.46580543484233	4.31620365473263	1.5873553963557e-05	0.000558495901723923
ENSG00000163687	15.9383037817905	3.78131249383297	0.877102928191234	4.31113883250944	1.62415886772043e-05	0.00057027863916592
ENSG00000162377	655.784563076588	-0.824369758821553	0.191274705404727	-4.30987336813423	1.63348054907029e-05	0.000572383561033694
ENSG00000180113	137.531160860746	5.34104434142438	1.24159271988276	4.30176841076252	1.69440357822696e-05	0.00059240473039935
ENSG00000159763	18.6725038576564	5.6867720589335	1.32208592678499	4.30136343162083	1.69750381916233e-05	0.00059240473039935
ENSG00000117984	9989.88682583438	-1.126223443178	0.262057003824739	-4.29762771740766	1.72635792225116e-05	0.000601254818873102
ENSG00000187634	22.9691081835747	3.92409953088993	0.914265395956262	4.29207924552977	1.77007749231045e-05	0.000612760226462802
ENSG00000134070	527.4752822883	1.70928487080254	0.398239907874145	4.29209839849281	1.76992477656565e-05	0.000612760226462802
ENSG00000087245	2641.63118739735	1.43783927818816	0.334929024594263	4.29296708438445	1.76301150960472e-05	0.000612760226462802
ENSG00000163083	18.8806089548868	3.67086653175024	0.855807599163488	4.28935958892903	1.79189054508807e-05	0.000619065799763862
ENSG00000006747	32.0971142794001	4.06739232728666	0.948980827728809	4.28606375222683	1.81866816236161e-05	0.000627057830329289
ENSG00000158470	5816.61446626839	1.15867763716828	0.27060819367587	4.28175370977911	1.8542614933281e-05	0.000638051379854199
ENSG00000135114	594.45828891485	-2.20938596064963	0.517186100771601	-4.27193607359788	1.93783134420329e-05	0.000665476811916518
ENSG00000166670	4652.51471129883	2.5776136581006	0.604739796140098	4.2623516337983	2.02286801401344e-05	0.000693295700818751
ENSG00000148600	404.003632099721	-1.46587105219761	0.344096475629424	-4.26005831508804	2.04373574391877e-05	0.000699055138650547
ENSG00000167768	1350.79137565956	-9.40201446304708	2.20728717227594	-4.25953386633993	2.04853660536582e-05	0.000699306989986486
ENSG00000167600	209.918981025125	2.09998795941466	0.493133392518569	4.25845824126702	2.05841661217715e-05	0.000701288273515007
ENSG00000188293	245.80929265461	-4.68593054953881	1.10111426660459	-4.25562604323384	2.08464884814498e-05	0.000708821806963131
ENSG00000006118	6764.87142032502	1.13673627539105	0.267257359691659	4.25333946538469	2.10605936825581e-05	0.000714689377334147
ENSG00000206190	26.4350323675299	3.95215201760005	0.930298491259263	4.24826231014346	2.15435057383081e-05	0.000729637827219667
ENSG00000184012	1258.10940891383	1.74781662052429	0.411584007493686	4.24656106335984	2.17076637789573e-05	0.000733753153864361
ENSG00000189377	4149.56328212283	1.44310615033741	0.340338252193936	4.24021143975048	2.23309338160151e-05	0.00075334062020498
ENSG00000115652	998.335743812116	1.00464769664209	0.237265768301066	4.23427156743192	2.29293724504044e-05	0.000770507525408609
ENSG00000164099	1184.11986994547	0.986938076206408	0.233060572335393	4.23468485603016	2.28872446730392e-05	0.000770507525408609
ENSG00000258498	32.4667554576019	4.60141122904956	1.08800298907471	4.22922664299188	2.34496016937905e-05	0.000786453015870694
ENSG00000160991	305.939752320891	1.76133215870264	0.416595134784979	4.22792301597986	2.35858458095108e-05	0.000789483418584891
ENSG00000143013	1377.99837521088	0.935624328098362	0.221324969871074	4.22737808862407	2.36430199686247e-05	0.000789860502058617
ENSG00000153132	25.8682902312142	5.49460000647312	1.29997462947374	4.22669787694045	2.37145733130032e-05	0.000790715569477169
ENSG00000124406	43.4924877165531	2.67565018390501	0.63355452660469	4.2232358408742	2.408195892688e-05	0.000800752026008387
ENSG00000133424	175.317571789809	2.33826515837564	0.553699460713606	4.22298615816257	2.41086631486396e-05	0.000800752026008387
ENSG00000185885	1192.04013026495	-2.599821580491	0.616167001785581	-4.21934568543433	2.45012356222957e-05	0.000812223042161075
ENSG00000162614	34.7367138028323	1.89323404006614	0.449406557982994	4.21274235196583	2.52288787299165e-05	0.000834736266438873
ENSG00000148965	23.1403703991867	3.30211659661307	0.784346161014122	4.21002455388267	2.55342936013288e-05	0.000843219810769408
ENSG00000249082	147.701124891203	2.21165303379161	0.525476966269313	4.2088486760771	2.56675209154479e-05	0.000845596397666242
ENSG00000198353	12.3668588247235	-3.69883787292759	0.87889219905153	-4.20852281647197	2.57045577436469e-05	0.000845596397666242
ENSG00000232679	24.2661945477048	5.1079865660301	1.21443332605926	4.20606587156588	2.59854522643043e-05	0.000853205546197245
ENSG00000197712	1901.31880205595	1.01248881456203	0.240770797294909	4.20519774797224	2.60853981687604e-05	0.000854855762844806
ENSG00000185507	39.5428472827891	-2.60616593240792	0.62042567285954	-4.20060943061254	2.66197464835936e-05	0.000870708627852145
ENSG00000141526	4804.37682782351	1.21305478188121	0.288850948980872	4.19958731713062	2.67401898048524e-05	0.000872988549511358
ENSG00000108950	269.005346409732	2.67678536914721	0.638054400024498	4.19523064027838	2.72594062597125e-05	0.000888253948292338
ENSG00000103381	869.946849176721	2.4236242980805	0.578040182368798	4.19283013881237	2.75495729041807e-05	0.000894591628270161
ENSG00000101335	170.981799741773	2.13039268668088	0.508112041949293	4.19276165648026	2.75578938089617e-05	0.000894591628270161
ENSG00000116717	2705.29217347119	0.93556057547772	0.223185942986423	4.19184363925031	2.76696679147716e-05	0.000896528505600086
ENSG00000167642	5276.40746489808	0.543899486834741	0.12990979569206	4.18674730367529	2.82980576735209e-05	0.000915165568182193
ENSG00000170899	615.444302971551	-1.15402713276858	0.275766522326894	-4.18479778847339	2.85420060533985e-05	0.00092132310346852
ENSG00000138821	416.124499746647	-1.15254414094323	0.275646363101439	-4.18124196515915	2.89921137507456e-05	0.000934099844722055
ENSG00000117983	11.5267855401917	6.67558200372201	1.59746212577079	4.17886715185875	2.92964745521059e-05	0.000942141765736415
ENSG00000268879	25.1731784141161	-4.2002593765407	1.00597389514408	-4.17531647373328	2.97572074352179e-05	0.000955173048363665
ENSG00000196371	57.8121762232243	2.55028652217945	0.611041709104137	4.17367011806524	2.99731663285316e-05	0.000960313457509098
ENSG00000125285	369.289289641245	2.55883385935456	0.613233265523867	4.17269251883886	3.0102105817784e-05	0.000960865919471193
ENSG00000006210	49.9043714858271	3.44692570517672	0.826046247063549	4.17279990972653	3.00879158703954e-05	0.000960865919471193
ENSG00000069535	18.5210912233518	3.17809107385531	0.761729298584709	4.17220537500684	3.01665537988751e-05	0.00096113992242527
ENSG00000111674	131.767202598722	1.71010366569021	0.410031434146806	4.17066479122167	3.03712336234323e-05	0.000965872596101945
ENSG00000273179	19.154769025107	5.00590976915915	1.20109645150607	4.16778333070767	3.07576082855964e-05	0.000974557367502185
ENSG00000232756	17.866552435218	5.42644650172799	1.30198179355545	4.1678359317986	3.07505133429516e-05	0.000974557367502185
ENSG00000167754	1999.64835843398	-3.35309394268927	0.805303144178397	-4.16376611333143	3.13040786906133e-05	0.000990049032852944
ENSG00000130487	71.8867422534089	-2.36961450308084	0.569455959700828	-4.16119010208577	3.16593401041387e-05	0.000999447608241662
ENSG00000152242	1515.8215323907	0.813610278556045	0.195554375489072	4.16053221269656	3.17506827934931e-05	0.00100049541659716
ENSG00000158856	398.514140203767	1.13275184032936	0.272352787957065	4.15913436695913	3.19455944331085e-05	0.0010047969876081
ENSG00000186187	979.717406638042	1.02500792232567	0.246620416055274	4.15621682389806	3.23560770770796e-05	0.00101400055757952
ENSG00000100379	130.74066664058	-1.48049096616998	0.35617989898821	-4.15658202603675	3.23044220804129e-05	0.00101400055757952
ENSG00000159200	1022.15212141547	1.00017957535278	0.240748639504161	4.15445577351018	3.26062673880115e-05	0.00101998332801952
ENSG00000165272	14796.3595967715	-1.17376790420571	0.282612852363981	-4.15327149628001	3.277554859228e-05	0.0010234179918878
ENSG00000188921	244.368748192947	1.33852774806486	0.322552561192005	4.14979730161892	3.32769821629825e-05	0.00103719289513426
ENSG00000280237	18.0652760739131	-3.55155404094206	0.856151928309518	-4.14827546783039	3.34989173428448e-05	0.00104222219327965
ENSG00000250451	7.60342550107445	-6.39508727165309	1.54213317872865	-4.14690985179715	3.3699266907006e-05	0.00104656297316794
ENSG00000167797	528.396761222455	0.877252745179391	0.211620736287451	4.14540068506232	3.39220005550279e-05	0.00105158201720587
ENSG00000204839	140.748968626857	1.94400483321463	0.469304427467393	4.1423108742133	3.43823865016359e-05	0.00106393697798677
ENSG00000189182	11.9914708873557	-7.50988696448166	1.8132266856904	-4.14172536933638	3.44702936925343e-05	0.00106474219565539
ENSG00000021355	21617.3167930365	1.24350085870601	0.300957660422327	4.13181328217742	3.59912732866734e-05	0.00110649111441266
ENSG00000170542	406.003430201448	2.69059203865549	0.651212856233678	4.13166296227115	3.60148226719611e-05	0.00110649111441266
ENSG00000166415	41.7489460423381	9.43863621361392	2.28439299102497	4.13179179357355	3.59946388338652e-05	0.00110649111441266
ENSG00000266028	861.168262426154	-0.886050894859535	0.214510770183364	-4.13056600422504	3.61871175662398e-05	0.00110872244228758
ENSG00000118513	30.4450550595901	-2.41944863016037	0.585768947293924	-4.13038048762655	3.62163331918409e-05	0.00110872244228758
ENSG00000148660	2834.92522133434	-0.803599275154935	0.194630401554118	-4.12884764527133	3.64585875809023e-05	0.00111415630431514
ENSG00000267313	66.4896437129234	3.70630668050844	0.898421977891861	4.12535175197434	3.70168562566655e-05	0.00112921101399987
ENSG00000155324	495.690009125558	1.13499866131517	0.275269607222461	4.12322549070195	3.73603637998995e-05	0.00113767267111021
ENSG00000188290	1126.69333543992	1.25280984820281	0.304161172893205	4.11890129264686	3.80683160310238e-05	0.00115584648083612
ENSG00000105137	436.721493580843	-1.8745760938017	0.455131097690626	-4.11876073358525	3.80915405192722e-05	0.00115584648083612
ENSG00000091317	4147.56410045715	1.01169440690451	0.245816636120227	4.11564661721957	3.86095471483883e-05	0.00116950221600004
ENSG00000048540	9.13224406897387	-6.92796245197651	1.68424572735467	-4.11339173343654	3.89887938769405e-05	0.00117891423313315
ENSG00000232537	6.31715521137908	6.43441754804296	1.5645452786232	4.11264386908971	3.91153553556155e-05	0.00118066612086555
ENSG00000163376	74.7509581624272	-1.29546244211167	0.315260879569035	-4.10917600649527	3.97073368359631e-05	0.0011964356046633
ENSG00000119699	247.291970556125	1.65384570276013	0.402714292905255	4.10674697147942	4.01270381815084e-05	0.00120696799285464
ENSG00000286156	207.59605235942	2.0222307499917	0.492574548185424	4.10543085801189	4.03561981501723e-05	0.00120752763334559
ENSG00000176194	8.72722596997246	-7.12905521176797	1.73622132812657	-4.10607512779516	4.02438639972481e-05	0.00120752763334559
ENSG00000130479	448.818011262543	1.00510949474031	0.244807535806094	4.10571305099217	4.03069587260337e-05	0.00120752763334559
ENSG00000130649	77.0347532551633	2.4044249360734	0.585846824433434	4.10418702601774	4.05739135999807e-05	0.00121193434633276
ENSG00000122729	761.136710695065	1.26194259954514	0.307669734835915	4.10161435026475	4.10277664605527e-05	0.00122336693579516
ENSG00000049089	104.113570902293	2.86772061322411	0.699403420794812	4.10023818580297	4.12725128623035e-05	0.00122686338619608
ENSG00000136802	6269.02843660644	1.2137148484639	0.296016938965387	4.1001533652296	4.12876431623092e-05	0.00122686338619608
ENSG00000104267	2412.50506799289	-2.15524208231949	0.525795042699313	-4.09901559979524	4.14911073050829e-05	0.00123078362273095
ENSG00000151692	126.380200265015	-2.22953387587947	0.544311000907266	-4.09606616835457	4.20229866668515e-05	0.00124227746667213
ENSG00000157570	15.1137349747494	4.26271067536383	1.04059375357966	4.09642154846696	4.19585588749457e-05	0.00124227746667213
ENSG00000184319	172.660070398251	1.05276701525368	0.257299129296819	4.09160737593952	4.28393507794495e-05	0.00126423847368856
ENSG00000173110	250.20420776799	2.36563960199945	0.578268476630323	4.09090188658469	4.29698899979011e-05	0.00126591944762652
ENSG00000198113	1730.41241016014	0.766199448612338	0.187314518255566	4.09044347308392	4.30549140510127e-05	0.00126625606196183
ENSG00000174514	114.979886129067	2.67888000397514	0.655161219761391	4.08888670936717	4.33448469866872e-05	0.00127260766622176
ENSG00000151491	246.116797465488	1.66580350169684	0.407602196098077	4.08683642444363	4.37295203751439e-05	0.00127953469056862
ENSG00000186526	7.36282034590609	-6.83724305109423	1.67294580554643	-4.08694832099537	4.37084431284958e-05	0.00127953469056862
ENSG00000181885	7238.88570902906	0.950574924122706	0.23261903449073	4.08640215622848	4.38114120870572e-05	0.00127975440570088
ENSG00000156049	36.702322308011	2.77779956477576	0.680669459684025	4.08098163544057	4.48458986874504e-05	0.00130775201172472
ENSG00000151572	164.937257828182	-2.15475934856074	0.52908023087891	-4.07265141050771	4.6480964519238e-05	0.00135313873866919
ENSG00000126561	238.142267383173	1.0818807287597	0.265825455117957	4.0698913814692	4.70350616291177e-05	0.00136695647859623
ENSG00000054219	84.595744829277	2.55604286849927	0.628290282259788	4.06825147654024	4.73672453099384e-05	0.00137428913247469
ENSG00000183580	26.0784980914331	2.72590937965117	0.670280973397814	4.06681598887237	4.76598462894968e-05	0.00138045059833467
ENSG00000110328	580.338986867771	0.959453846606445	0.236095791888507	4.06383289990841	4.82733908360839e-05	0.00139352968009199
ENSG00000187714	10.4746372785853	-6.33004338469608	1.55751056192782	-4.06420575206953	4.8196297297963e-05	0.00139352968009199
ENSG00000071967	552.420264536131	-1.79374069461973	0.441569540833745	-4.06219299282486	4.86138596137183e-05	0.00140100746173203
ENSG00000091831	409.03719476537	-1.40003471195855	0.344685828607371	-4.06177044648192	4.87019545826062e-05	0.00140119921169522
ENSG00000181617	513.61833188195	13.0924671528159	3.22561631168774	4.0589040628845	4.93035627572086e-05	0.00141613989522166
ENSG00000132613	594.62777674924	0.859699143849173	0.212242540486001	4.05055057238102	5.10972644802158e-05	0.00146521405897019
ENSG00000142871	479.302277505193	1.35840050984726	0.335437684165153	4.04963596510657	5.12973673304094e-05	0.00146850450069833
ENSG00000134762	15493.0157586127	-0.966197845218453	0.238685729028961	-4.04799167989311	5.16589822992666e-05	0.00147639998415097
ENSG00000134013	1007.11871464317	1.25382921869	0.309951356745838	4.04524513734635	5.2268401656438e-05	0.00149133971890384
ENSG00000128383	290.713534266981	2.09664737006802	0.519160809203973	4.03853167052961	5.37868322157519e-05	0.00153212325872849
ENSG00000139144	22.3087858285525	-3.98395938768543	0.986740527357955	-4.03749443468454	5.40251260520481e-05	0.00153636742764543
ENSG00000005020	1225.74203738044	-1.07573595041674	0.266682900071804	-4.03376425757745	5.48903874646008e-05	0.00155839788173013
ENSG00000189120	670.303523635705	-1.33673360965877	0.332127648976997	-4.02475859440223	5.70337914440936e-05	0.00161658382503399
ENSG00000172782	18.442676522141	-2.78562755128972	0.692378171185835	-4.02327466002976	5.73944972238844e-05	0.00162413211305416
ENSG00000231764	17.3762305226373	-4.62999489209448	1.15193202633899	-4.01932994849468	5.83638889229236e-05	0.00164885173878309
ENSG00000008513	1674.12737107972	1.23964368670988	0.308583428973743	4.01720756954631	5.88918474551992e-05	0.00166103973027328
ENSG00000243244	102.189450055447	2.22610828589698	0.554662609923848	4.01344573452068	5.98387639760846e-05	0.00168498516237076
ENSG00000153904	75.4081428711929	2.27090567957353	0.566133380766045	4.01125557461516	6.03966852648509e-05	0.00169257787976397
ENSG00000218416	41.1829080167127	2.33834750452328	0.582950416983009	4.01122880505879	6.04035349128204e-05	0.00169257787976397
ENSG00000073060	594.11118180794	-1.19518830467858	0.297955204747255	-4.01130198645942	6.03848113983726e-05	0.00169257787976397
ENSG00000168268	1033.20748419094	1.20672093457874	0.300930181630709	4.009969781162	6.07265191731287e-05	0.00169335455814211
ENSG00000283265	24.4973955317281	4.60746935397678	1.14892263081282	4.01025206607442	6.06539611866867e-05	0.00169335455814211
ENSG00000173530	828.539763052894	1.73033577727416	0.431427239915774	4.01072444477999	6.053272543036e-05	0.00169335455814211
ENSG00000103942	957.07394507527	1.11630024746553	0.278482882765265	4.00850578815095	6.11041414340227e-05	0.00170112743264136
ENSG00000149564	26.1619328909945	2.84396220914659	0.709746653207054	4.00701038362899	6.14921606735233e-05	0.00170916417510173
ENSG00000106266	538.215576261587	0.777725527056406	0.194251961683217	4.00369458468948	6.23608629287229e-05	0.00173051394627206
ENSG00000013725	9.60846397167245	4.58658590331007	1.14668834316619	3.99985395390501	6.33815858501598e-05	0.00175600673840902
ENSG00000236345	22.8469445509427	2.34524765355399	0.586620033489734	3.99789901412398	6.39072036938221e-05	0.00176772257162735
ENSG00000251442	57.013722280468	-1.75533066891543	0.439656055213903	-3.9925087988642	6.53779062744354e-05	0.00180052336880604
ENSG00000254285	13.6309952108731	5.68810969771418	1.42473320653975	3.99240339988207	6.54069808488101e-05	0.00180052336880604
ENSG00000160471	150.934622605015	1.7526640438259	0.438996499726382	3.9924328438115	6.53988574352533e-05	0.00180052336880604
ENSG00000186191	8.59389852155495	7.07832281876956	1.77312715806063	3.99199955095805	6.55184969042214e-05	0.00180071204350979
ENSG00000134242	149.922158432915	-1.84124572074733	0.461309392605818	-3.99134669759619	6.5699151982684e-05	0.00180279730440523
ENSG00000131019	216.762371564472	1.18266361150555	0.296421458293616	3.98980430874906	6.61278302489301e-05	0.00181167089081663
ENSG00000118515	3301.15417527815	-1.18552576586768	0.297246578669888	-3.98835798606211	6.65322124859937e-05	0.00181696304098654
ENSG00000215559	40.8854213869009	4.20814325836	1.0550563937561	3.98854817928606	6.64789024036188e-05	0.00181696304098654
ENSG00000158786	23.7068294555168	-5.72451133405008	1.43572251311985	-3.9871989759432	6.68579519030965e-05	0.00182296523374449
ENSG00000143819	1028.65489042804	1.45449000114518	0.3650324340167	3.98455004433561	6.76081086228134e-05	0.0018405023874296
ENSG00000125848	1431.78373980785	-1.57666000430892	0.395753254857847	-3.98394703001306	6.77799869621884e-05	0.0018422664702756
ENSG00000174145	36.976736593627	-2.99688234011964	0.753158377463817	-3.9790865106106	6.91805662883994e-05	0.00187146484747156
ENSG00000173930	29.7193100712246	8.94498294393883	2.24770943369512	3.97959932447039	6.90315147719578e-05	0.00187146484747156
ENSG00000026025	1543.20442122895	1.76820642780431	0.444357519459952	3.97924272768759	6.91351289150717e-05	0.00187146484747156
ENSG00000165271	1321.74470429015	-0.863689133257839	0.217160641286939	-3.97719001076548	6.97344415030314e-05	0.00188348675990527
ENSG00000157227	14113.8715197708	1.09358922013002	0.275052747175266	3.97592545924719	7.01060838692398e-05	0.00189055669744557
ENSG00000184809	36.7561129579984	9.10215916485188	2.29212271185376	3.97106102469117	7.15532463322139e-05	0.00192656275922651
ENSG00000198853	340.668425823719	0.991748218798691	0.24989034972637	3.96873356608071	7.22556141445818e-05	0.00194094989992738
ENSG00000166313	20.2517692617671	-3.23513285727547	0.815193973351176	-3.96854363873199	7.2313216265821e-05	0.00194094989992738
ENSG00000168811	13.0719588801078	3.28043517240102	0.827124354962149	3.96607251705354	7.30666404776559e-05	0.00195811767822129
ENSG00000054654	2859.4201186591	1.12305129437654	0.283339582396888	3.96362303097991	7.38207911558031e-05	0.00197525149585629
ENSG00000085063	12330.7022440528	1.05658612604357	0.266774132439754	3.96060186338411	7.47610927333444e-05	0.00199520979092879
ENSG00000149591	430.809560130484	1.82201596673704	0.460049043276295	3.96048202548434	7.47986233739653e-05	0.00199520979092879
ENSG00000284070	6.02418658871263	-6.19509811065469	1.56540863101869	-3.95749581795984	7.57396130912906e-05	0.00201718272946696
ENSG00000214290	59.2941921799887	1.49680152356399	0.37861717409927	3.95333763484152	7.70685668247234e-05	0.0020462418089805
ENSG00000260597	6.51725066840496	-6.4781386794475	1.63856418840209	-3.95354586979282	7.7001493922277e-05	0.0020462418089805
ENSG00000172927	691.273071252645	1.83663881909787	0.464647789668569	3.95275488216124	7.72565663898464e-05	0.00204807276538876
ENSG00000143641	4504.16607834422	0.931775465478421	0.236176428359214	3.94525174231711	7.97161846511925e-05	0.00211002608757503
ENSG00000140459	7.04827487339932	6.76378431649718	1.71459797073665	3.94482230349966	7.98591760904055e-05	0.00211056393953215
ENSG00000196878	37511.9760553416	1.47272051940901	0.373390950613004	3.94417839262364	8.00740353065851e-05	0.00211299659118067
ENSG00000117450	6982.92614957992	0.863588152235815	0.219019954424934	3.94296562842084	8.04801932939377e-05	0.00212046206067718
ENSG00000177409	2706.59500304862	-1.24170316725559	0.315017685806418	-3.94169350865791	8.09083218803946e-05	0.00212748129553772
ENSG00000166106	414.169109731877	1.33036287516683	0.337532193898082	3.94143995511295	8.09939115708925e-05	0.00212748129553772
ENSG00000111725	1081.4603478676	0.719674705843459	0.182754594174959	3.93792949004873	8.21877361093909e-05	0.00215554878012511
ENSG00000203760	209.94745896244	2.05964183399493	0.523450816578048	3.93473802841576	8.32874910236473e-05	0.00217823279779343
ENSG00000100196	159.420456466741	1.11852327890554	0.284272630433072	3.93468508453148	8.3305851842376e-05	0.00217823279779343
ENSG00000171368	369.229904146575	1.54194653843192	0.391948749416121	3.93405143077745	8.35258985983918e-05	0.00218067236022053
ENSG00000142973	1473.6825427985	-2.11647868524322	0.538142303120606	-3.93293497457843	8.39149436419487e-05	0.0021875100081208
ENSG00000077274	13.0904810527682	6.79805962921975	1.72895669689253	3.93188542051861	8.42822367751523e-05	0.00219320646346246
ENSG00000280350	7.3281031874564	6.96051920443557	1.77041144167683	3.93158281774488	8.43884149265999e-05	0.00219320646346246
ENSG00000166016	383.188697139364	-1.32976861871414	0.338379289505525	-3.9298168060384	8.50106041775978e-05	0.00220604441157703
ENSG00000107554	1086.30064760081	-0.970091492036067	0.247271683210511	-3.92318068709144	8.73875620713024e-05	0.00226431175517584
ENSG00000105523	700.836655823446	1.28394844825175	0.327307731521415	3.92275624618952	8.75417074257324e-05	0.00226489485151839
ENSG00000196549	243.056367656955	-2.1683752752434	0.553068876547367	-3.92062429688663	8.83198668063001e-05	0.00228159655916275
ENSG00000109339	450.159883989829	1.20284743731825	0.307087780555849	3.91694985434138	8.96763932727668e-05	0.00231316693591897
ENSG00000174792	14.8475119979284	3.58300165339088	0.916078256427266	3.91123970932866	9.18235807168667e-05	0.00236500704526002
ENSG00000168447	1000.54631982357	-1.70624073567324	0.436761934985211	-3.90656922914084	9.36158305494998e-05	0.00240688401568199
ENSG00000167363	137.993705769745	1.27852858218131	0.327301102262592	3.90627643274955	9.37292816336492e-05	0.00240688401568199
ENSG00000163331	354.878010205616	-1.56412823720057	0.400743757626942	-3.90306326033065	9.49828641827203e-05	0.0024354399079936
ENSG00000196597	73.9183592264759	-1.12545636426021	0.288546374613933	-3.90043495007011	9.60200241050029e-05	0.00245836981358121
ENSG00000101004	154.09495902346	1.30531005135495	0.334700778390152	3.89993132861311	9.62199755825422e-05	0.00245982864769337
ENSG00000184221	7.14659906672435	6.89306603058152	1.76766282128094	3.89953669195036	9.63769317916399e-05	0.00246018562533407
ENSG00000152128	10.2913562540086	4.52689490192097	1.1616941103336	3.89680455608146	9.74702145853989e-05	0.00247983305623855
ENSG00000179241	314.042019570388	-1.01988308277685	0.261717954211968	-3.89687855327967	9.74404504514793e-05	0.00247983305623855
ENSG00000134775	393.997597410902	1.80346336922228	0.462837808371567	3.89653424288634	9.75790165111014e-05	0.00247983305623855
ENSG00000234380	17.0312628698331	4.13657524668888	1.0621267079737	3.89461560060055	9.83545779367027e-05	0.00249585621445571
ENSG00000081853	43.7928052517356	2.10088198644086	0.539740687788906	3.89239135379491	9.9260955362983e-05	0.00251144814267665
ENSG00000157680	30.3885657117637	3.60481286286274	0.926048960941085	3.89268064098835	9.91426267424191e-05	0.00251144814267665
ENSG00000064787	1709.09854371954	1.25256644370229	0.322138207469945	3.88828898484249	0.000100953384949302	0.00255051833781606
ENSG00000069188	702.653732016899	0.809984367582972	0.208385323240165	3.88695496875019	0.000101509576052076	0.00256080975949556
ENSG00000188257	49.9314431379136	8.76589780615982	2.25601484106059	3.88556743803991	0.000102091146995974	0.00257171037198497
ENSG00000173212	216.92599932412	1.31459817089265	0.338366946368755	3.88512585227516	0.000102276892415358	0.00257262271053543
ENSG00000237945	279.723931781293	2.69480815570062	0.694156045401981	3.88213597439762	0.0001035429492036	0.00260066633729626
ENSG00000226137	444.180362853348	1.00364879624112	0.258620738721274	3.88077460919632	0.000104124303700945	0.00261145575098362
ENSG00000152778	1068.1928944671	-0.976638072549261	0.251694996462808	-3.88024428881953	0.000104351603218327	0.00261334691902665
ENSG00000140297	5536.44409606796	1.39570760916985	0.359859722496819	3.87847686728038	0.000105112519631459	0.00262732302590274
ENSG00000182938	8.9743812497957	6.05418519642284	1.56106530111522	3.87823955352652	0.000105215086593838	0.00262732302590274
ENSG00000173320	187.265536468136	1.07418297424562	0.277019391547091	3.87764541769641	0.000105472286373428	0.00262992853196352
ENSG00000153898	7.67825371373592	-6.66360922326902	1.71930325121497	-3.87576142752018	0.000106291789758205	0.00264312774678449
ENSG00000179820	703.154563660744	1.21033510457359	0.312286335511896	3.87572226812174	0.000106308886996505	0.00264312774678449
ENSG00000165169	2083.91255433088	0.842430173186537	0.217440879768746	3.87429527549044	0.000106933694169186	0.00265482569723065
ENSG00000176490	79.5934164329572	1.41185384001587	0.365319588658595	3.8647088298769	0.000111221797616261	0.00275730695675472
ENSG00000135205	141.589435799765	1.49845328541721	0.387948044882235	3.86251021286131	0.000112227871989014	0.00277824537779998
ENSG00000116667	1284.79002553044	-0.997227623597814	0.258228002763339	-3.86181054311044	0.000112549833258368	0.00278221247300319
ENSG00000124496	980.701119138226	-0.996735204943431	0.258395545528685	-3.85740088090172	0.000114599126860136	0.0028281101237089
ENSG00000204381	194.997473114825	2.28596759994236	0.592663238132041	3.85711050198978	0.000114735301734892	0.0028281101237089
ENSG00000224810	20.2498418247385	2.94610888110016	0.764065253000738	3.85583413135175	0.000115335674894016	0.00283884161166174
ENSG00000244541	20.4816128743735	-2.3334186821504	0.60527398264021	-3.85514452805655	0.00011566127882695	0.00284278900316811
ENSG00000237515	7.42521535144744	6.94515077974079	1.80211373720214	3.85389148108012	0.000116255138917903	0.00285330908000359
ENSG00000091513	92.9561860265966	5.00450498345907	1.30177199912812	3.84437903627586	0.000120858081616305	0.0029611367461029
ENSG00000135002	721.903365686777	1.07617000909401	0.279978651210064	3.84375738808234	0.000121164793330802	0.0029611367461029
ENSG00000173598	1809.3805473827	-1.0146052193161	0.263957477639227	-3.84382071078452	0.000121133517340834	0.0029611367461029
ENSG00000242317	47.5055899734771	2.99153927061846	0.779047853199702	3.83999424211442	0.000123037196002439	0.00299413713892782
ENSG00000185742	14.5424932843511	-6.30446448842996	1.64155125379075	-3.84055293666365	0.000122757496342416	0.00299413713892782
ENSG00000088756	18.4927899399524	3.46022335868299	0.901070980351502	3.84012295827481	0.000122972703525371	0.00299413713892782
ENSG00000115457	5134.43445560647	1.14523869641155	0.299086655184157	3.82912001107635	0.000128602285857497	0.00312483838915482
ENSG00000137872	180.412694017242	-2.47597930442715	0.646672958788603	-3.82879672139893	0.000128771311706525	0.00312483838915482
ENSG00000187054	3988.17628592888	1.84250408606305	0.482074796543564	3.8220294843739	0.000132357859494009	0.00320734784872453
ENSG00000183255	5483.47272178041	0.808314781732641	0.211791863090639	3.81655258109096	0.000135329246230567	0.00327473935498862
ENSG00000205403	41.8527069947828	2.47951944868641	0.649801553519565	3.81581028124112	0.000135736769140492	0.00327998751834575
ENSG00000081320	1137.7549057314	1.17532577532443	0.308064874196754	3.81518918178829	0.000136078641094086	0.00328363677422686
ENSG00000105376	56.8024645434123	1.72812319252075	0.453210624407554	3.81306858103733	0.000137252006839402	0.0033073120135461
ENSG00000100767	614.447571463927	1.92609297269471	0.505252678935327	3.81213807070433	0.000137769877507323	0.00331514789162725
ENSG00000131435	591.493585199127	1.03651943329709	0.272164972419461	3.808423340016	0.00013985568977153	0.00336063846720554
ENSG00000112584	20.4715667403038	-3.26860708311778	0.858501227583119	-3.8073411872918	0.000140468888159111	0.00336683317843933
ENSG00000107815	467.269616643042	-0.785920910698314	0.206425941373203	-3.80727783276727	0.000140504866150505	0.00336683317843933
ENSG00000134874	85.2757543648925	1.91529049022759	0.503298927667731	3.80547301998631	0.000141533442517003	0.00338676339152301
ENSG00000197142	55.2712301081258	2.16701007284512	0.569542091892802	3.80482865742781	0.000141902384444499	0.00339087572828834
ENSG00000270806	15.7720535663076	3.2555023308768	0.856021638412672	3.80306079284807	0.000142919265659258	0.0034104382325486
ENSG00000068079	577.980412150192	-1.33520761090047	0.351249290555259	-3.80131048461267	0.000143932806249134	0.00342986694115838
ENSG00000139531	417.956615061529	0.919850099128037	0.242022318191546	3.80068295354493	0.000144297832509751	0.00343380941677768
ENSG00000117586	19.0287789261771	2.79467784975881	0.735385431837483	3.8002899279305	0.00014452689393638	0.00343450995880582
ENSG00000130589	4088.0581687061	-1.07528556208733	0.283684381980178	-3.79042918958601	0.000150387202114323	0.00356884387914058
ENSG00000286010	271.653782385239	-1.63683373945414	0.432240001151861	-3.78686316650981	0.000152561057053786	0.00361544488513829
ENSG00000285103	205.776660893678	-1.90286725311357	0.502551928063502	-3.78640921833877	0.000152839897640518	0.00361707075502766
ENSG00000167555	529.497946120418	0.856787857514513	0.226564412516426	3.78165241397916	0.000155790791017837	0.00368184142783225
ENSG00000200033	10.1334959499715	5.43498115190053	1.4373717489869	3.78119380440811	0.000156078107093264	0.00368357178674844
ENSG00000107331	532.314879079667	1.65288880351053	0.437327986195583	3.77951756046848	0.000157132511938159	0.00369667341331026
ENSG00000141622	44.2992721967582	2.06767228668433	0.547050539194096	3.77967324505408	0.000157034300242492	0.00369667341331026
ENSG00000235888	14.1959414588313	-3.11186360099942	0.823399568717967	-3.77928738272792	0.000157277822641273	0.00369667341331026
ENSG00000063660	4823.65782185437	0.732576200260982	0.193924613649006	3.77763392937273	0.000158325367312396	0.00371621820547035
ENSG00000163453	936.567189323132	1.79284983707661	0.474876740807725	3.7754003997482	0.000159750847686201	0.00374456857553282
ENSG00000101160	1807.26923219719	1.11955287195159	0.296838390711838	3.77159055898001	0.000162210266978418	0.00379704441273971
ENSG00000103196	233.217289412709	-1.77350696172928	0.470393456793899	-3.77026282171764	0.000163075719322388	0.00380694403112848
ENSG00000167107	936.960833214051	-1.24522839664426	0.330271585170117	-3.7703164684993	0.000163040666946273	0.00380694403112848
ENSG00000255398	122.039096612674	1.57212372889383	0.417088243286232	3.7692832492882	0.000163717012203203	0.0038167360365259
ENSG00000133142	820.734284020955	-0.805471611688844	0.213800077354499	-3.76740561395263	0.000164952874784517	0.00384034399278432
ENSG00000129295	101.25208351715	1.2344436726208	0.328151296451	3.76181257234534	0.000168686439772864	0.00392195972471909
ENSG00000002549	1830.575819599	-1.0809281801805	0.287374278587932	-3.76139501938673	0.000168968337362187	0.00392321220555522
ENSG00000150281	65.1101819199373	1.35340214335592	0.35984687696809	3.76105012987493	0.000169201512648761	0.00392333157024518
ENSG00000145283	174.182218238715	-1.79186722801522	0.476845100812376	-3.75775534856604	0.00017144438015515	0.0039699872955173
ENSG00000214711	4177.37023128807	1.90290816099715	0.506624200508709	3.75605460435251	0.000172613047331275	0.00399167671953574
ENSG00000253669	31.0978857443853	-1.90850388568231	0.509205639237494	-3.74800225806648	0.000178248650021272	0.00411646714579326
ENSG00000230836	13.0307034143169	5.7595446481073	1.53769904041559	3.74556040989053	0.000179991527002061	0.00415114506979954
ENSG00000109906	89.3496777917279	-2.27258864677262	0.607393908877209	-3.74154006742279	0.000182896010527084	0.00421248441916797
ENSG00000102804	2529.07381559433	0.834319576090474	0.223108841415858	3.73951821360304	0.00018437328946007	0.00424083214593651
ENSG00000106484	199.321198557384	1.53467232048364	0.410456828799381	3.73893723481877	0.000184799855144227	0.00424496863518881
ENSG00000196369	118.830551727507	-1.10739075715637	0.296654889003	-3.732926030237	0.000189268190837825	0.00434181229781971
ENSG00000197576	14.0481050127857	-3.45574189446949	0.92612708260356	-3.73139060435917	0.000190425699662751	0.00436254881850551
ENSG00000124134	30.9406891358981	-2.11890225368889	0.568691811060772	-3.72592362414457	0.000194601326374348	0.00445228167589184
ENSG00000185420	127.40859435406	1.27012703668733	0.341099680925732	3.72362422984465	0.000196383158464765	0.00448277283737184
ENSG00000158023	428.030519852426	2.10471617142102	0.565247274026084	3.72353174997159	0.000196455142073721	0.00448277283737184
ENSG00000090447	164.473139797363	-1.28053757751685	0.34405368564876	-3.72191210538035	0.000197719852006161	0.00450565570035233
ENSG00000170044	31.3628884793962	-3.10010597167843	0.833171090219322	-3.72085158507164	0.000198552106298061	0.00451863622864833
ENSG00000166710	6432.47214478691	-1.02295360119079	0.275137443157486	-3.71797305903312	0.000200827681183715	0.00456438606970386
ENSG00000026652	354.223455815727	1.64528755783857	0.442590285660707	3.71740549023224	0.000201279246173349	0.00456861402429085
ENSG00000171246	9.48448054559016	-4.18297213883206	1.12584399175014	-3.71541010076323	0.000202874386728038	0.00459875339085097
ENSG00000136997	4765.57335082982	-0.728595120024701	0.196216060603966	-3.71322876314016	0.000204631760147795	0.00463248609650371
ENSG00000141401	846.129205538609	-1.56711769518896	0.42281833602648	-3.70636172006225	0.000210257948779872	0.00475359790901142
ENSG00000119681	1899.5215605816	1.28794360459011	0.347578468561885	3.70547580210883	0.00021099427389509	0.00476398488499346
ENSG00000148426	602.909128459299	0.690735292284357	0.186474910632703	3.70417280233955	0.000212081655264554	0.00478226065377019
ENSG00000136231	1470.95956298924	1.04906792577557	0.283367543103735	3.70214568078297	0.000213783799469458	0.00480803956846017
ENSG00000134398	163.827187587404	2.51021499856026	0.678017781521731	3.7022849060483	0.000213666484996463	0.00480803956846017
ENSG00000118557	81.5307695636605	-2.20585062840949	0.595966669588887	-3.70129864801188	0.000214498833544933	0.00481154163121325
ENSG00000169515	78.5654251094321	-1.48150781968736	0.400243731228385	-3.70151411276443	0.000214316733416967	0.00481154163121325
ENSG00000182175	648.349035581387	1.48114467068188	0.400614354006693	3.69718322838011	0.000218004995304163	0.004883822844021
ENSG00000220412	9.28877581838253	5.99390586202117	1.62197355271876	3.69543994843452	0.000219506359585242	0.00491106231035642
ENSG00000166147	191.267983621235	1.53641862801347	0.415905015939634	3.69415748579592	0.000220617045959367	0.00492950165679339
ENSG00000155966	9.15752829834961	7.03014986254965	1.90453101570498	3.69127612235151	0.000223131745175169	0.00497922396334474
ENSG00000272398	70010.4693636335	0.788189815771976	0.213604849706449	3.68994344863969	0.000224303909393981	0.00499889735896818
ENSG00000232316	7.83544552759174	-5.83753694916916	1.58269284572811	-3.68835745035773	0.000225706419786506	0.00502364676898685
ENSG00000078399	430.027434813117	-5.89886165484514	1.59967869841032	-3.68752903986728	0.000226442258083936	0.0050335129849278
ENSG00000140511	107.639503948933	1.36626121774661	0.37095575970026	3.68308398513768	0.000230429199682176	0.0051155282329443
ENSG00000115129	4340.76748741537	-1.26347954285126	0.34314237901499	-3.68208539696597	0.000231333889279057	0.00512589554017274
ENSG00000239893	19.5550215663801	-3.47824342309012	0.944684226166991	-3.68191118973472	0.000231492056652962	0.00512589554017274
ENSG00000106392	1579.8011471628	0.858673177619173	0.233341147648763	3.67990466435732	0.00023332116573166	0.00515313306343158
ENSG00000159921	990.832681149934	1.68712147382912	0.458434031711564	3.68018374973222	0.000233065947491633	0.00515313306343158
ENSG00000198736	557.500712009308	-0.905555906586363	0.246114336214015	-3.67941144963986	0.000233772842566433	0.00515648943122498
ENSG00000101265	44.4288330950856	4.03986283419776	1.1008582363868	3.66973939120196	0.000242797870088551	0.00534870339932588
ENSG00000137547	827.140448505769	-0.675614075056138	0.184385596929685	-3.66413692992399	0.00024817399846407	0.0054531719585879
ENSG00000166912	70.5158496629414	-1.1678395340326	0.318713712423565	-3.66422745087465	0.000248086253919407	0.0054531719585879
ENSG00000138439	369.928762367801	1.02753287330453	0.280475907724327	3.66353346225539	0.000248759701214318	0.00545906971861268
ENSG00000198648	1841.37846726529	1.21796628410601	0.332680430718195	3.66106981849413	0.000251164297129186	0.00550481749313075
ENSG00000257042	26.1669559693607	5.12822176207067	1.40087729966104	3.66072158019228	0.000251505942184825	0.00550529228408386
ENSG00000142046	370.136321775743	-1.5631887418226	0.427344122817203	-3.65791561965918	0.000254274724426804	0.00555882672650973
ENSG00000197930	7541.59809790523	1.37374356825637	0.375672109628268	3.65676219513795	0.000255421135243125	0.00557680283230706
ENSG00000136059	448.679229892558	-1.16462071473247	0.318810124875027	-3.65302298723732	0.000259171019583805	0.00565150493274952
ENSG00000127124	36.6481524722923	1.99855316988534	0.547693928777634	3.64903290848192	0.000263229386017738	0.005732736185361
ENSG00000148346	42815.7579018209	1.0024886449062	0.27476692800493	3.64850548857979	0.000263770268886415	0.00573725344651172
ENSG00000167081	227.265995071321	-1.2281046423093	0.337022343820314	-3.64398582120143	0.000268448214796839	0.00583163072674194
ENSG00000110080	831.739649115288	0.98295609845287	0.270306213519042	3.63645395219013	0.000276417028945174	0.00599053358257707
ENSG00000170412	719.303898063312	1.53548510910151	0.422252502459104	3.63641446802373	0.000276459381840523	0.00599053358257707
ENSG00000172594	440.840759797158	-1.30216275626562	0.358213099545756	-3.6351623039941	0.000277805680924841	0.00601213426454326
ENSG00000271369	39.8666474754446	3.56510347227275	0.980949350642562	3.63434000943827	0.00027869313338691	0.00602376301497713
ENSG00000187210	347.128242358471	1.90431246311012	0.524956456407148	3.62756270518781	0.000286109303628599	0.00617629933366379
ENSG00000091137	11.6307876183619	3.57063268037639	0.984608428273485	3.62644943699853	0.000287345053585269	0.00618744886975538
ENSG00000183067	5.8271778540641	6.55920634814057	1.80860105148607	3.62667396590923	0.000287095420160299	0.00618744886975538
ENSG00000232453	35.3631889548736	-1.82796208464742	0.504244185741526	-3.62515252795482	0.000288790953881581	0.00621081045191575
ENSG00000132821	291.046853418797	2.31487024154519	0.638869918007297	3.62338275179009	0.000290775044386702	0.00624567370620875
ENSG00000130413	15.5752616683991	3.2693698065833	0.902485862645533	3.62262717002516	0.000291626008317781	0.00625614148766512
ENSG00000231324	5.6779004404357	6.5196358017795	1.80013217529226	3.62175394188541	0.000292612375765053	0.0062694843400221
ENSG00000162543	16.3208813296101	4.68167209064686	1.29327535021499	3.62001184810998	0.000294589526325249	0.00630399602043023
ENSG00000175040	303.266768641307	1.99923322818755	0.552568678289096	3.6180719370083	0.000296805907714961	0.00634353495929926
ENSG00000171889	39.573242266789	1.86213420538464	0.514739017614417	3.6176278495747	0.0002973154773752	0.0063465419208937
ENSG00000196711	18.3227736653784	3.62973586655553	1.00389924141987	3.61563762257832	0.000299609251262795	0.00638758013379973
ENSG00000155016	85.3291236961825	1.38272983136366	0.383892066896864	3.60187133467164	0.000315934731891615	0.00672729834430104
ENSG00000163393	519.302138325651	0.730654341677269	0.203062540293633	3.598173944937	0.00032045927376685	0.00677020924200928
ENSG00000138378	56.7291442009944	1.7850180904541	0.496056202137334	3.59841905566965	0.000320157461502569	0.00677020924200928
ENSG00000206538	487.623087139983	-1.88735619594383	0.524334499544677	-3.59952701487843	0.000318796514400631	0.00677020924200928
ENSG00000164093	181.186877234446	-5.28761023875475	1.46973760703092	-3.59765594447603	0.000321097979743073	0.00677020924200928
ENSG00000185345	39.1965375500982	1.82992739612171	0.508598702243733	3.59797889386819	0.000320699636315032	0.00677020924200928
ENSG00000261150	1117.17223646077	-1.22474594321045	0.340301447029169	-3.59900304245686	0.000319439452687106	0.00677020924200928
ENSG00000092068	848.195238941121	-1.32154887726103	0.367311158170529	-3.59790016683209	0.000320796699885311	0.00677020924200928
ENSG00000265787	5.17802064390998	5.82509968106052	1.61827882833096	3.59956490753101	0.000318750065370117	0.00677020924200928
ENSG00000262714	23.6864407881803	-2.20432786136014	0.613034883692948	-3.59576252509674	0.00032344275941133	0.00681130070461681
ENSG00000162493	3658.78002919061	0.987916780032555	0.274781711538502	3.59527850125546	0.000324044733454535	0.00681563525560548
ENSG00000225972	298.674283417566	-5.91206893936804	1.64583020112967	-3.59214998929422	0.000327960986052978	0.00688958335169901
ENSG00000233461	103.214974630945	-1.18448441752345	0.329978336262914	-3.58958236755185	0.000331208167316125	0.00694733086940964
ENSG00000144711	783.985475552295	0.747658921649845	0.208299890845789	3.58933899875809	0.000331517503271451	0.00694733086940964
ENSG00000159208	107.512112206631	1.68439138426486	0.469519261605669	3.58748090228407	0.000333888179424217	0.00698849893794849
ENSG00000165092	111.29854103861	2.82224128288571	0.787079143088135	3.58571473741832	0.000336156260109833	0.00702742218127543
ENSG00000145990	1336.74813463488	0.651788266743441	0.18192267986749	3.58277630484663	0.000339961718714244	0.00709614167197608
ENSG00000182378	503.331076055357	-1.26477487644519	0.35303850492616	-3.58254088094365	0.000340268345212454	0.00709614167197608
ENSG00000012779	7.43499662673288	-5.36168254612175	1.49736180615898	-3.58075284414759	0.000342605622346675	0.00713623454294738
ENSG00000139725	43.5081718251236	2.0387055663919	0.569516536021192	3.57971268162798	0.000343972198031412	0.00715603587319279
ENSG00000029993	1010.43255623696	1.19046426456013	0.333144034040166	3.57342213253201	0.000352346054466875	0.00732139355930264
ENSG00000132429	34.3013574113328	3.39549652779188	0.95051068655573	3.57228653587873	0.000353877908380778	0.00734435393690144
ENSG00000254607	19.6511255163078	3.74633997568496	1.04887072481461	3.57178428861872	0.00035455739538302	0.00734959034646368
ENSG00000186472	128.249034578492	-2.09443725599431	0.586974996752753	-3.5681881981023	0.000359458284561117	0.00744221394208667
ENSG00000101187	437.103535542535	1.36846745682505	0.384248825424422	3.56140960304435	0.000368869109373733	0.00762787623410465
ENSG00000130826	1477.58372482201	-0.58932008714437	0.165801630564072	-3.5543684651318	0.000378887982357369	0.00782565154436799
ENSG00000163531	246.393540499606	-1.33204492311684	0.374906313755443	-3.5530074427761	0.000380853689277287	0.00785681981296848
ENSG00000018236	513.93561695751	-2.09515869391064	0.589919132398412	-3.55160322634805	0.000382891768344888	0.00788940463996862
ENSG00000105559	153.092072755926	-1.79721684575251	0.506181221491801	-3.55054033900311	0.000384441215487804	0.0079118553976886
ENSG00000099260	481.600084273392	1.3663935321037	0.385095843730281	3.54819080587302	0.000387887115944238	0.007973235161076
ENSG00000224945	17.5819574699598	2.5673320852161	0.724333949522058	3.54440391329182	0.000393501905707287	0.0080693686384909
ENSG00000119638	1599.58837447032	-0.673214160587148	0.189936707274898	-3.54441313765008	0.000393488137038254	0.0080693686384909
ENSG00000107159	186.818439448091	1.32965552782513	0.375344462881459	3.5424940536423	0.000396362358956035	0.00811835045933165
ENSG00000154764	494.659136047032	1.37930856261023	0.389580621633733	3.54049582041839	0.000399375960995733	0.00817034888101258
ENSG00000151208	9.86336029815538	7.02444573621639	1.98430993889541	3.53999423100537	0.000400135778675062	0.00817617110701239
ENSG00000127080	553.329375356485	-0.728981936464796	0.205993142510804	-3.5388650689018	0.000401851200944694	0.00820148269543708
ENSG00000163565	4965.45682902975	-0.768556575895138	0.217272471633305	-3.5372938417723	0.000404249641890132	0.00824065768805655
ENSG00000161542	976.025327868784	0.657276608272929	0.185923477376147	3.53519962916343	0.000407467201481736	0.00829641798993286
ENSG00000116711	452.046321669684	-1.33546756162425	0.378024107874673	-3.53275765699842	0.000411249266771162	0.00834380145612954
ENSG00000069974	634.139175094898	0.931444657041904	0.263630244686513	3.53314794419548	0.000410642606393774	0.00834380145612954
ENSG00000130517	567.879603399983	0.900225153517689	0.254809219944862	3.53293791218578	0.000410968975094944	0.00834380145612954
ENSG00000069869	557.645314910952	-0.91059432473426	0.257798673754143	-3.53219165744303	0.00041213054093198	0.0083518326934449
ENSG00000249267	8.87834127681773	4.02466803933904	1.1400453778635	3.53027003791853	0.000415135723659804	0.00840283544184345
ENSG00000138623	312.240029306566	1.33299053276801	0.37764697424046	3.52972650038829	0.000415989457031881	0.00841022163129673
ENSG00000148120	790.336021680639	0.836663828105376	0.237128422405831	3.52831524629922	0.000418213773022841	0.00844526756438729
ENSG00000165071	17.5440837411856	2.78610839175457	0.79015425503867	3.52603099203486	0.000421837600991941	0.00850845946666629
ENSG00000198682	95.4057363050469	1.98669303654573	0.564303826626881	3.52060883304862	0.000430557262140849	0.00867416591935985
ENSG00000186442	19.5006823123295	2.44956795378677	0.695949218412738	3.51975099472565	0.000431952118345061	0.00869208911827694
ENSG00000108604	2758.14020370516	-0.610937941325412	0.173614543617342	-3.51893296838058	0.000433286168462415	0.00870874828083628
ENSG00000198478	2849.11888834461	1.29116170033743	0.367151594695785	3.51669914822858	0.00043694873658365	0.00877211553433103
ENSG00000104332	2223.97626378602	-1.3214524948821	0.376227640491956	-3.51237483018039	0.000444121149290381	0.0089057160530781
ENSG00000171428	192.920745358907	0.870641431990002	0.247931934313441	3.51161472765069	0.000445393172343555	0.00892082599554233
ENSG00000131724	4786.90868724859	0.860263775995253	0.245041036778782	3.51069268765738	0.000446940760155814	0.00894141369590788
ENSG00000187957	111.61433044947	-1.76178346630979	0.50239310470944	-3.5067827360583	0.000453559307829966	0.00906328442649774
ENSG00000148655	14.4676075821226	3.07965073151349	0.879130186389564	3.50306562007737	0.000459936142044179	0.00918004793952448
ENSG00000107859	9.24780334398881	3.66895698137297	1.04753300526471	3.50247387235863	0.000460958990416709	0.009189802352398
ENSG00000148154	4315.71947580173	-1.0112180039175	0.289035176842732	-3.49859838848515	0.000467710491712826	0.00931360996518423
ENSG00000111859	352.077366760783	1.52175539418488	0.43508615497557	3.49759553776268	0.000469472527578433	0.009337889984956
ENSG00000119121	39.9251109176642	-1.72403308389367	0.493192307179939	-3.49566093954638	0.000472889178546256	0.00938415030782968
ENSG00000185306	29.2311638294825	1.89482334234959	0.542008551353773	3.49592886978793	0.000472414613066433	0.00938415030782968
ENSG00000116661	336.899261224871	1.2686204149589	0.363067417817484	3.49417312791378	0.000475532533065395	0.00939685003743545
ENSG00000140526	2481.61366130933	0.848069415939572	0.242667325147816	3.49478206603624	0.000474448987451149	0.00939685003743545
ENSG00000261804	21.0332340318027	-2.51065495305719	0.718463029398379	-3.49448037035328	0.000474985537116298	0.00939685003743545
ENSG00000077348	294.875011483855	-0.829151678926101	0.237302444954008	-3.49407136992119	0.000475713826364794	0.00939685003743545
ENSG00000130584	103.157068428361	1.3103677560657	0.375135064632901	3.49305591400259	0.000477526510401466	0.00942183900396471
ENSG00000179846	90.3968345321598	-1.75618721780934	0.502908877637541	-3.49205849389493	0.00047931326920298	0.00944625978996251
ENSG00000082458	909.722283237247	1.04822273737251	0.300328396420931	3.49025516689188	0.000482559552460944	0.00949935594976034
ENSG00000127249	1134.64144986014	1.2957099888918	0.371395984032491	3.48875605714263	0.000485273791669224	0.00954186924076457
ENSG00000224269	5.01305954011046	6.4094444204974	1.83911286607558	3.48507399340547	0.000492000967563411	0.00966310119512385
ENSG00000173221	479.082382705432	1.26475165062639	0.363491840413911	3.47944990783345	0.00050244429042211	0.0098569601102764
ENSG00000162402	2039.4588303487	-0.69785845129741	0.20059481080979	-3.4789456839895	0.000503390605613388	0.00986427718630791
ENSG00000198053	1953.67322753389	0.68746358914982	0.197645706385772	3.47826219815776	0.00050467600837316	0.00987821470314017
ENSG00000233429	179.556393043624	-1.74187438843618	0.500971145459216	-3.47699544020542	0.000507066441105705	0.0098912450331334
ENSG00000130558	7.94697072012752	4.05927270243936	1.16732243570481	3.47742198580158	0.000506260352988981	0.0098912450331334
ENSG00000010278	9306.16657240759	1.08997088620251	0.313462752154629	3.47719427176099	0.000506690539418994	0.0098912450331334
ENSG00000109814	895.619218458626	0.89133124023578	0.256432427851241	3.47589128139772	0.000509158647194395	0.00992080920156237
ENSG00000135899	1073.34985363685	-0.955884664913756	0.275178368822669	-3.4736911516826	0.000513351559194625	0.00999119182799042
ENSG00000131015	418.497983124438	0.832687383767013	0.239763153866057	3.47295808526188	0.000514755738847242	0.010007200550132
ENSG00000269729	9.18306609017822	-4.57033948103467	1.31720303358216	-3.46973045499716	0.000520980912922052	0.0101167907526229
ENSG00000183508	75.6172092083403	1.81095753077807	0.522058544236403	3.46887825277698	0.000522636236454577	0.0101374931772277
ENSG00000156475	42.6058949352173	2.24987256038331	0.648782337318729	3.46783879734076	0.00052466191747561	0.0101571148094008
ENSG00000106025	35.6624349445105	2.73500232555662	0.788695723390415	3.46775346238661	0.000524828542026	0.0101571148094008
ENSG00000258955	45.45222098476	1.55349215633254	0.44807345283976	3.46704797279767	0.000526207967407111	0.0101723686283588
ENSG00000169891	48.5704624927801	1.57610357620408	0.454841022683073	3.46517463817744	0.000529887264799668	0.0102319981940273
ENSG00000162511	12.7449322206363	4.16702895275359	1.2029212835254	3.46409113366193	0.00053202623533921	0.0102388270458737
ENSG00000168427	10.4440214981427	3.00135623222382	0.866405736662919	3.4641463060759	0.000531917124116222	0.0102388270458737
ENSG00000250208	28.5227709649935	-2.78012948915627	0.80245437542274	-3.46453278130819	0.000531153399295682	0.0102388270458737
ENSG00000215595	23.1723348370337	-2.27952527389377	0.658370709804366	-3.46237346216561	0.000535433622931197	0.0102928888072975
ENSG00000100219	3668.73660189835	0.761424142398474	0.220041024150608	3.46037356141968	0.000539426491908972	0.010358072313944
ENSG00000136280	889.927034932394	0.723184880625397	0.209077480235731	3.45893244843978	0.000542320901461624	0.0104020413708442
ENSG00000140284	217.736285527925	-1.84165593821307	0.532632613572832	-3.45764771304459	0.000544913426496654	0.0104401286223552
ENSG00000167468	2444.80376528872	0.711530388280445	0.205806516631327	3.45727822387203	0.000545661170244765	0.0104428258443395
ENSG00000129514	1575.44532423426	1.63707180569154	0.47385781478869	3.45477431119621	0.000550753638233349	0.0105285737175609
ENSG00000185043	2509.68367722312	0.765270449041563	0.221617170243689	3.45311894471027	0.000554144601213014	0.0105816402484683
ENSG00000280027	9.68629876824584	-3.45603400963496	1.00096126816193	-3.45271502460959	0.000554974964447472	0.010585747520309
ENSG00000125144	11.3530214538879	2.7613564411344	0.800194462030926	3.45085672565886	0.000558810135970834	0.01064709677672
ENSG00000137573	187.222075634107	1.25903510200625	0.36497633258235	3.44963492042918	0.000561345141825058	0.0106835654481196
ENSG00000136147	690.066881632175	-0.719404126230693	0.208646932926533	-3.44794968294119	0.000564859256214455	0.0107385674068174
ENSG00000133321	1343.99635315754	-1.25781491289383	0.364894650215015	-3.44706317879055	0.000566716037535053	0.0107619750836541
ENSG00000135063	21.5920417388658	2.20903638618251	0.641050009302107	3.44596576574021	0.000569022440392054	0.0107938600738096
ENSG00000142583	68.6088854501063	-2.5137326771091	0.7297708761907	-3.44455055569006	0.000572009653559828	0.0107955672797591
ENSG00000116525	347.863825352936	-0.948048470207844	0.275194580761691	-3.44501140823271	0.000571035290346195	0.0107955672797591
ENSG00000250421	5.57548969362033	5.58326037102768	1.62059888724673	3.44518339174796	0.000570672068235384	0.0107955672797591
ENSG00000125355	12.0797048329862	3.81563223615737	1.10757659613688	3.4450278648591	0.000571000525316265	0.0107955672797591
ENSG00000147689	25138.3734565045	-0.807022188363528	0.234297264197282	-3.44443709630344	0.000572249773852968	0.0107955672797591
ENSG00000182534	1765.29720081535	1.00526611708098	0.29208050448769	3.44174329212495	0.000577978461960636	0.0108916970843732
ENSG00000167034	78.4525118165076	1.72559402484001	0.501621524623374	3.44003185695752	0.000581645718687293	0.0109488124617231
ENSG00000232063	9.18935000318288	-4.61510676816787	1.34189139123624	-3.43925506811406	0.000583317356546291	0.0109682788189934
ENSG00000092421	165.579427812755	2.24275530870751	0.652237538550271	3.43855601088598	0.000584825539860321	0.0109799541297794
ENSG00000051596	844.53089773962	0.902247268275012	0.26240506756748	3.43837593015612	0.00058521464324369	0.0109799541297794
ENSG00000120306	320.312948117421	1.01503178991006	0.295234929433508	3.43804776710428	0.000585924330373732	0.010981294231024
ENSG00000105926	304.730143131883	-0.867253282100094	0.252386757733931	-3.43620754863201	0.000589918862603443	0.0110441284342679
ENSG00000109846	578.812765869643	2.94040997021549	0.856310444310019	3.43381304029844	0.000595154541739798	0.0111300368376448
ENSG00000117115	33.7227517050086	2.3798434648544	0.693181915450988	3.43321631999886	0.000596466007970922	0.0111341338371924
ENSG00000228918	21.9958818908205	3.09404159467235	0.901231964765431	3.4331245624179	0.000596667910368576	0.0111341338371924
ENSG00000164181	258.41671095672	-2.37210549565316	0.691043031869318	-3.43264512665217	0.000597723890634079	0.0111350341654855
ENSG00000229847	6.23141742934742	-5.68055880425051	1.65492608728107	-3.43251511225089	0.000598010553264086	0.0111350341654855
ENSG00000171462	138.105932857513	-1.82283510484038	0.531295798301235	-3.4309232458994	0.000601530774842386	0.01117638982847
ENSG00000127507	876.831645783512	-0.950719972481875	0.277087303998293	-3.43112065678668	0.000601093179149967	0.01117638982847
ENSG00000069011	16507.1757091117	1.08618377776622	0.316654903158336	3.43018145916123	0.000603177726270307	0.0111949005183178
ENSG00000165181	21.9382075479444	-2.26865725675628	0.662380471556246	-3.42500625271474	0.000614785271432902	0.0113980394342706
ENSG00000175879	101.136382220685	-4.51267422721827	1.31827731838661	-3.42316003186732	0.000618976246967616	0.011454271534801
ENSG00000185052	499.71005066938	1.85965166503635	0.543267930628625	3.42308382327025	0.000619149812691945	0.011454271534801
ENSG00000143452	38.1626792820505	6.53911483373077	1.91081005438935	3.42216894803838	0.000621236986760006	0.0114805395888356
ENSG00000160293	1757.87308321926	0.984808687762731	0.288456867807606	3.41405872998516	0.000640027776687511	0.0118151050406745
ENSG00000087460	16455.4944946747	0.671308763362074	0.196660141866113	3.41354764108277	0.000641229463468803	0.0118246011993363
ENSG00000226281	25.5699187102368	2.11270686709973	0.61928581874819	3.41152147060352	0.000646014134382195	0.0119000783533679
ENSG00000115380	1792.4289488954	1.75097035576937	0.514580421609952	3.40271468216992	0.000667199152780253	0.0122771779931382
ENSG00000168010	1019.66180189916	-1.79982007341563	0.529260818815653	-3.40062972627211	0.000672308270090138	0.0123579741313043
ENSG00000196839	871.110254101038	0.794907480100381	0.234036147158041	3.39651583634895	0.000682496080271685	0.0125318517193963
ENSG00000240207	22.8431005306529	-2.91523492849419	0.85927737988977	-3.39265875806968	0.000692178084852477	0.0126958877183948
ENSG00000013375	810.866646830776	0.622470605893493	0.183507086393851	3.39207939118775	0.000693643385951244	0.0126958877183948
ENSG00000006451	2955.57611521141	0.755792264202621	0.222794070520155	3.39233563280243	0.000692994959321085	0.0126958877183948
ENSG00000228318	14.484721618441	-4.12202859261163	1.21572369455846	-3.39059657310431	0.000697406785263977	0.0127512048251506
ENSG00000123989	3086.81453808289	0.82151344948414	0.242344510226697	3.38985788749937	0.000699288645823417	0.0127591346819484
ENSG00000176788	2672.30407866521	0.680272623710841	0.200696820043497	3.38955357420913	0.000700065279846514	0.0127591346819484
ENSG00000204642	34.1902074821909	-6.53267217026561	1.9271943689755	-3.38973186899585	0.00069961015883825	0.0127591346819484
ENSG00000271601	343.546943873225	1.15568723157173	0.341191328122569	3.38721162091367	0.000706069024183141	0.0128277904551963
ENSG00000147041	924.709500286259	1.16314789073244	0.343366515763523	3.38748199761419	0.000705373461642706	0.0128277904551963
ENSG00000197183	263.81552480648	1.49771638904221	0.442106679725214	3.38768097775203	0.00070486197841948	0.0128277904551963
ENSG00000273760	345.254362829819	-0.865172169228373	0.255479332147096	-3.38646638049859	0.000707989506867258	0.0128491133603915
ENSG00000255501	11.9462323746995	-4.65485861138792	1.37490086010519	-3.38559582472861	0.000710239073269774	0.0128763574874673
ENSG00000160710	8449.40320424483	-0.638774734339785	0.188966387718731	-3.38036167199521	0.000723905035432679	0.013110301194336
ENSG00000181826	319.980671996937	0.921982561782855	0.27296978123587	3.37759937238687	0.000731215275235113	0.0132287684652157
ENSG00000160190	790.427534954631	0.79585264142419	0.235772875928322	3.37550550838655	0.000736802170913357	0.0133158417547944
ENSG00000050730	12.767797291032	4.31834163730485	1.28004451236733	3.37358708668534	0.000741955727004421	0.0133731788555671
ENSG00000186642	39.4092556763286	-1.99467330639317	0.591334299852282	-3.37317369699585	0.000743070612598452	0.0133731788555671
ENSG00000138316	77.6383354903664	2.48021990302729	0.735341679034002	3.37288089842193	0.000743861212715936	0.0133731788555671
ENSG00000166578	68.7276540345253	1.7206090339748	0.510069689113968	3.37328226063312	0.000742777672849596	0.0133731788555671
ENSG00000172183	392.180417843974	0.892148926928938	0.264497380266579	3.37299721467853	0.000743547047873531	0.0133731788555671
ENSG00000170293	94.6928514760968	1.0553481333633	0.313122462185237	3.37040059661699	0.000750589806450583	0.0134379787929056
ENSG00000271550	14.6978526946258	-2.47277778469881	0.733635848708809	-3.37057927178841	0.000750103211421671	0.0134379787929056
ENSG00000169710	9120.7559567171	-0.736179802821348	0.218392398654743	-3.37090396623729	0.000749219704590569	0.0134379787929056
ENSG00000131037	5994.84300038833	1.33096443722355	0.394813896851402	3.37111851390705	0.000748636441994976	0.0134379787929056
ENSG00000101017	262.930573267175	1.07847321783303	0.3200358587341	3.3698511851107	0.000752087883373683	0.0134508025295678
ENSG00000136542	6315.25076043599	1.30977859686287	0.38883187886343	3.36849591831669	0.000755795161092058	0.0134750836752216
ENSG00000114423	618.93413104083	1.08660235060398	0.322552318921319	3.36876310248769	0.000755062949327788	0.0134750836752216
ENSG00000180611	277.566747428594	-1.12627498007642	0.334348773544282	-3.36856321659949	0.000755610669678118	0.0134750836752216
ENSG00000166920	3196.6185269353	1.03942458777414	0.308655239404908	3.36759093990487	0.000758280134153975	0.0135053930725871
ENSG00000233369	767.157930109157	0.822110165768818	0.24417924860412	3.36683059870366	0.000760373811457797	0.0135286777933107
ENSG00000253187	9.52225795513713	-3.9044843392054	1.16010925480285	-3.36561778387755	0.000763724533531638	0.0135742568175742
ENSG00000075213	178.078773621509	2.23725402572928	0.664845155032322	3.36507532437461	0.000765227654350914	0.0135869368349922
ENSG00000110719	2036.88053061676	1.21667975052295	0.361621730802098	3.36450950506841	0.000766798430042134	0.0136007907101803
ENSG00000178035	3228.82696027607	-0.457809533207226	0.136108802750237	-3.36355565515712	0.000769453199378083	0.0136338231671472
ENSG00000177000	833.211119570217	-0.662479589162996	0.197053720367189	-3.36192378366942	0.000774014844669649	0.0136892835077224
ENSG00000261068	800.621101027838	0.730634169538877	0.217329897024013	3.36186681880289	0.000774174533741	0.0136892835077224
ENSG00000130508	2151.08693994125	1.89249737685801	0.563853660841398	3.35636266692669	0.000789749325178253	0.013950346139314
ENSG00000083444	1664.26415991551	0.737802268626459	0.219862889805443	3.35573806602534	0.000791534979064445	0.0139659573608251
ENSG00000090020	2325.2762627484	0.687955228251735	0.205024017955457	3.35548603091564	0.000792256575656222	0.0139659573608251
ENSG00000162645	1394.36772920722	-1.27207195059043	0.379144131107404	-3.35511444387906	0.00079332157265994	0.013970417254467
ENSG00000134955	1521.4263627296	-0.676863310295443	0.201948062188886	-3.35167024114526	0.00080325634876216	0.0141309053992362
ENSG00000156006	5.26540714739676	5.07428976952032	1.51514897050772	3.3490368724733	0.000810930028774915	0.0142513290552323
ENSG00000177156	5530.64660547848	0.633949352511554	0.189345611000729	3.34810693081823	0.000813656106847398	0.0142700849320178
ENSG00000091622	1635.5900946272	0.677524896790437	0.202348366707978	3.34830919474737	0.000813062457540613	0.0142700849320178
ENSG00000198300	11.8276049731207	4.12566234603653	1.23287402320981	3.34637786859626	0.000818747383167073	0.0143447543048773
ENSG00000278599	31.8663226703748	-2.16113347742999	0.64713118223511	-3.33956010273791	0.000839111912827283	0.0146865925332588
ENSG00000106804	31.8692477507659	-1.62998967569596	0.488155921503129	-3.33907590565921	0.000840575921575653	0.0146972649702328
ENSG00000104131	2259.25569999322	-0.488400731882006	0.146345677739799	-3.33730889374387	0.000845938746818919	0.0147760163847914
ENSG00000174501	39.7477350845119	2.00410866106425	0.600845406463377	3.33548137258898	0.000851518583918634	0.0148583947630021
ENSG00000181830	2492.95600965083	0.679283966486725	0.203744309929624	3.33400214573531	0.00085605997378877	0.0149225044063179
ENSG00000182118	321.499195334178	-1.06685957634326	0.320108997911654	-3.33280096249498	0.000859764252938469	0.014971906854055
ENSG00000085552	672.735864266302	0.852762399652108	0.256036594106108	3.33062702473968	0.000866506188132559	0.015074053555936
ENSG00000169676	6.93885617741672	6.69902522350397	2.01330673028554	3.32737437506796	0.000876685073254447	0.0152357239245886
ENSG00000103490	482.761165015814	-1.15917538367598	0.348416743958288	-3.32697955473334	0.000877928145890921	0.0152419311302253
ENSG00000154274	231.161822214936	1.44065987621644	0.433317148066838	3.32472389482777	0.000885061373291847	0.0153502831930305
ENSG00000186665	230.269026207537	1.17901212898775	0.354764861925391	3.32336219147798	0.000889393549505541	0.0154098852157531
ENSG00000135838	552.754247719806	1.27106197274528	0.38261175366347	3.32206724068193	0.000893531583459712	0.0154630270508811
ENSG00000068724	1304.8379640184	0.626559279361187	0.188657439074138	3.32114801534523	0.000896479803680728	0.0154630270508811
ENSG00000144648	47.1231306057173	1.3231047568752	0.398431909091506	3.32078010491707	0.000897662322866938	0.0154630270508811
ENSG00000083720	379.334588725534	-1.27308450919383	0.383372864929058	-3.32074756889591	0.000897766968060104	0.0154630270508811
ENSG00000125384	12.2243331650345	3.66001870170741	1.10217599130979	3.32072076561743	0.000897853183599546	0.0154630270508811
ENSG00000128833	416.869850245923	1.06152231999816	0.319579405541707	3.32162305076828	0.000894955104414426	0.0154630270508811
ENSG00000101336	14.8439895945046	5.82264691116371	1.75368501385374	3.32023531316401	0.000899416020804437	0.0154744526379403
ENSG00000263639	1169.06027349075	-3.41729422711018	1.0297138984127	-3.3186832113055	0.000904429700347475	0.0155451678266517
ENSG00000158887	11.2082802114433	2.57198147415532	0.775123591473527	3.31815661714788	0.000906136608356498	0.0155589624219297
ENSG00000001461	2888.33667598834	0.619819582629756	0.186882955376146	3.31661911800476	0.000911137373568884	0.0156138257973956
ENSG00000198363	5481.41063017058	1.02756461414601	0.309839658646365	3.31643992455728	0.000911721867174802	0.0156138257973956
ENSG00000204175	85.2759661383808	-1.419338131901	0.428010574657133	-3.31612865648936	0.000912737988173802	0.0156138257973956
ENSG00000268601	26.9180161331097	-3.30267658144829	0.995964023570545	-3.31606012193909	0.000912961857145016	0.0156138257973956
ENSG00000172965	349.134355196344	0.876730197847212	0.264603327301289	3.31337556027376	0.000921771150293111	0.0157488308250178
ENSG00000016402	793.871213381635	-1.17109941551339	0.353581816991201	-3.31210305291952	0.000925974295027304	0.0158049481606595
ENSG00000112276	41.0513647069417	2.73875946468444	0.827445004226903	3.30989908778688	0.000933296122634491	0.0159141325965574
ENSG00000115919	1278.86129231166	1.39223799560148	0.420700659238385	3.30933162339682	0.000935189969006536	0.0159148797396216
ENSG00000196639	657.464697386863	-0.949999778730304	0.287055779982452	-3.30946054731375	0.000934759388140882	0.0159148797396216
ENSG00000197057	11.3907642227369	4.74323366208115	1.43353605561588	3.30876481515727	0.000937085179226639	0.0159313740203501
ENSG00000176533	15.956633132426	2.63669610394522	0.796994727327033	3.30829805209401	0.000938648543967563	0.0159421996041085
ENSG00000269994	22.5876822628433	4.8357558239115	1.46307969002437	3.30518963312993	0.000949121588101538	0.0161041784253323
ENSG00000118707	313.70686206847	1.33764342289279	0.404763734413815	3.30475116509631	0.0009506075777305	0.0161135008619244
ENSG00000102038	1112.07043636523	1.22062110541706	0.369390254132472	3.30442152103805	0.000951726176388703	0.0161165835283146
ENSG00000163564	8.09494717613396	-4.56958448337425	1.38374193034339	-3.30233866819391	0.000958822268367715	0.0162048498303208
ENSG00000159899	64.0372203844717	1.69771021815171	0.514085553979543	3.30238849352936	0.000958651947363638	0.0162048498303208
ENSG00000159212	563.426371423516	3.27752846843907	0.99271230135573	3.30158945745208	0.000961386723036042	0.0162322458977773
ENSG00000258657	6.74895050000958	6.54996588128293	1.98415154215889	3.30114194511379	0.000962921530729555	0.0162422205256882
ENSG00000172889	144.653737330983	1.51145922680899	0.458011802085045	3.30004427817852	0.000966695751481825	0.0162899122470566
ENSG00000183486	1546.55156066317	-3.29922462457025	1.00046190503903	-3.29770139967652	0.00097479738317767	0.0164103610348061
ENSG00000259178	11.3088737164476	-2.95947308985849	0.897794168541082	-3.29638261592592	0.000979385325151459	0.0164714804684563
ENSG00000167178	8.21096289217767	3.66638956155614	1.1129134981913	3.29440658911473	0.000986297199861784	0.0165715266832246
ENSG00000221890	31.3875033851363	2.08452475348682	0.633227078827186	3.29190715808871	0.000995104566667089	0.0167031942141534
ENSG00000113504	126.947292223488	1.41018766746411	0.428535480071476	3.29071391528398	0.000999334882402146	0.0167578524870652
ENSG00000070886	12.1188844425945	-5.23041426739362	1.59050882425821	-3.2885163462284	0.00100716935706171	0.0168614379416328
ENSG00000119938	2087.6395498259	1.99211476100397	0.605794774746122	3.28843173307137	0.00100747214205164	0.0168614379416328
ENSG00000099994	29.9800222547694	2.29710531570798	0.698742511391853	3.28748470038309	0.0010108668169817	0.0169018110652771
ENSG00000099250	852.30479537926	1.38727764775402	0.423170719281322	3.27829309672005	0.00104436894656388	0.0174450172093511
ENSG00000162512	460.345883032615	-1.15474738684312	0.35246365286366	-3.27621693034488	0.00105207717640139	0.0175415213451915
ENSG00000151320	114.563315171845	1.47741650613097	0.450955977260516	3.27618787781911	0.00105218541285892	0.0175415213451915
ENSG00000054690	268.683716753569	1.24424931046038	0.380602409169839	3.26915773647967	0.00107868150040064	0.0179658424147076
ENSG00000171124	3749.00862077009	0.899765036437567	0.275260281940426	3.26877902650809	0.00108012620118612	0.0179725060845332
ENSG00000271447	18.9254663657066	2.49884405133832	0.764609038242136	3.26813302793707	0.00108259468397531	0.0179961753988359
ENSG00000171729	1115.672932452	-0.665098411887282	0.203582366420585	-3.26697455963961	0.00108703448370348	0.0180525369615042
ENSG00000169439	53.3197833095935	1.6996513916183	0.520304372804742	3.26664829368279	0.00108828792537973	0.0180559245478865
ENSG00000155846	213.618519726001	-0.912445397580066	0.279349769522357	-3.26631877713807	0.00108955521176738	0.0180595350852194
ENSG00000143341	27.008573295082	2.51638520506465	0.771316605626168	3.26245433679183	0.00110451965609753	0.0182776684294663
ENSG00000198223	27.5931068418743	-3.8462810164113	1.17898293084081	-3.26237209699742	0.00110484017242923	0.0182776684294663
ENSG00000128578	510.242988962743	-1.04232903146949	0.319666201891175	-3.26067950037563	0.00111145592541678	0.0183694516779978
ENSG00000185950	610.322441269462	0.941953204177829	0.288991339723281	3.25945132155095	0.00111627934788345	0.0184314646644288
ENSG00000165443	7.21036039709062	5.9452208598301	1.82420587551895	3.25907340811453	0.00111776741536878	0.0184383397712559
ENSG00000102897	308.747157426451	0.814093736678526	0.250190040311645	3.25390145692635	0.00113831759033868	0.0187593430476791
ENSG00000138449	145.991377554789	1.44225400225903	0.443592269980999	3.25130553406804	0.00114876332730561	0.0189133713361656
ENSG00000203616	5.53437857656362	4.88849512782049	1.50386917311959	3.2506119649224	0.00115156914043813	0.0189414407851224
ENSG00000106785	2226.20359289072	-0.68298300895346	0.210165371052736	-3.24974093273474	0.00115510184734573	0.018981401416985
ENSG00000258837	12.9777560507915	5.22075272467952	1.60748646680841	3.24777398284733	0.00116311622406853	0.0190948612930334
ENSG00000185904	11.5578636057838	5.76842355629887	1.77672868064985	3.24665415666562	0.00116770190357128	0.01915186963865
ENSG00000203867	96.7847020628525	2.19249900407635	0.676543353576917	3.24073689067301	0.00119221167836032	0.019535239929704
ENSG00000120833	347.91236815328	-1.19729187250565	0.369510989202626	-3.24020640113925	0.00119443206366978	0.0195530006236332
ENSG00000159842	47.1670192062154	2.26603591001405	0.699428485716467	3.23983932066023	0.00119597072957246	0.019559578329177
ENSG00000145107	18.650190417687	-2.33317020903292	0.720215338894531	-3.23954529018243	0.00119720451742555	0.0195611621294459
ENSG00000169919	885.243696961574	0.751928134912245	0.232197753867236	3.23830925316434	0.00120240395210086	0.0196124715487745
ENSG00000175287	75.6989234228633	2.00926621427138	0.620477708048374	3.23825689176046	0.0012026246721277	0.0196124715487745
ENSG00000077097	3415.53799181269	-0.696335132927221	0.21506049615084	-3.23785700019414	0.00120431157755788	0.01962138323095
ENSG00000148468	291.097118241498	1.06795841215803	0.330087493605348	3.23537980943587	0.00121481018012342	0.0197737078041849
ENSG00000092929	333.531221080479	1.04710984666602	0.32413857142464	3.23043888934233	0.00123600323817085	0.0200996556831092
ENSG00000103888	273.881106450162	2.14713422820777	0.664980400905959	3.22886843775027	0.00124281054601775	0.0201722221172032
ENSG00000167491	2504.10001722198	-0.53835036415977	0.166718798205339	-3.22909215970182	0.00124183868670468	0.0201722221172032
ENSG00000138190	118.205745149542	1.28587069336959	0.398473945405253	3.22698813359513	0.00125100648146031	0.0202699903762361
ENSG00000107821	23.9952569081758	2.44537508044547	0.75779855533641	3.22694608379122	0.00125119033882957	0.0202699903762361
ENSG00000203786	15.9247052647475	-4.09316161608449	1.2692636171631	-3.22483175341701	0.00126046720854982	0.0203959099631331
ENSG00000167850	6.90995741426596	5.40021749847366	1.67467559488053	3.2246349770559	0.00126133380998393	0.0203959099631331
ENSG00000163053	173.784734841428	1.39408435359513	0.432612723128041	3.22247654556965	0.00127087570085511	0.0205309074490256
ENSG00000138018	1494.82563095229	-0.702745484798563	0.218113878001395	-3.22192008705685	0.00127334644750238	0.0205515249805614
ENSG00000244617	47.8691363460305	-3.17422646576561	0.985420025532103	-3.22119135345519	0.0012765888237181	0.0205845461219025
ENSG00000132915	10.4983679010389	3.35825865339937	1.0428880712375	3.22015252261388	0.00128122410262501	0.0206399444622315
ENSG00000158201	296.578519134083	0.808989898860406	0.251262000506473	3.21970651045407	0.0012832189786291	0.0206527432435114
ENSG00000221866	13.4784842781473	2.65794928221815	0.825887565850393	3.21829434431711	0.00128955409144125	0.0207159459787551
ENSG00000279207	94.8724288256092	1.24228991624525	0.386003212135175	3.21834087694122	0.00128934488250113	0.0207159459787551
ENSG00000227096	14.3554497590919	-3.342680627294	1.03951791473206	-3.21560656138917	0.00130169157277543	0.0208914211843296
ENSG00000158457	124.979887133735	1.93753735793137	0.602601287702891	3.2152891098478	0.00130313206009955	0.0208950485498721
ENSG00000171612	182.695482400398	-0.963362366569926	0.299644204624247	-3.21502085374212	0.00130435046194748	0.0208951114504715
ENSG00000107372	4543.62300560192	0.6931016393926	0.215643591936994	3.21410728307247	0.00130850773204047	0.0209422097951221
ENSG00000259342	50.2946835532281	1.42549649954821	0.443950278847571	3.21093727713965	0.00132302808892833	0.021154924042762
ENSG00000118257	859.744179530861	1.225830008722	0.38195500059657	3.20935714104383	0.00133032136853478	0.0212181038258586
ENSG00000102837	286.507725344991	5.61806829068428	1.75029482286174	3.20978398456251	0.00132834758041769	0.0212181038258586
ENSG00000109089	1172.58851796102	-1.03415040822237	0.322237529783521	-3.20927984061048	0.00133067910654469	0.0212181038258586
ENSG00000229021	19.5647412153773	2.40550113228222	0.749623670053679	3.20894500584536	0.00133222971063395	0.0212231594180158
ENSG00000171105	1437.30581145296	0.87052805927398	0.271357838235551	3.20804464294974	0.00133640752128496	0.0212700197999146
ENSG00000231971	152.109922449678	-2.0378928274341	0.635471314210085	-3.20689979526027	0.00134173723231658	0.0212756537732465
ENSG00000183479	16.1887997799458	-2.10801085688927	0.657327675452334	-3.20694067146748	0.00134154660059674	0.0212756537732465
ENSG00000130720	10.9114733694576	3.70466389578381	1.15510897025432	3.20719862037619	0.00134034419723749	0.0212756537732465
ENSG00000170423	5035.64157845469	1.88030623512059	0.586378769613651	3.20664105277801	0.00134294449274895	0.0212756537732465
ENSG00000230989	2676.83885153105	0.571644393704768	0.178221659256382	3.20749114383693	0.00133898183115421	0.0212756537732465
ENSG00000231991	5771.98204781646	0.596329846070835	0.185996030628011	3.20614286260487	0.00134527180934426	0.0212929176446808
ENSG00000093134	149.319696978542	3.8816929246508	1.21095198879509	3.20548870687527	0.00134833337620741	0.0213021815772714
ENSG00000205746	72.3912980450264	-1.12742898515859	0.351690756110385	-3.20573960381469	0.00134715837418347	0.0213021815772714
ENSG00000130396	4819.60817028103	0.498012011545088	0.155431965045268	3.20405144077054	0.0013550826295438	0.0213891712305514
ENSG00000198074	4129.55733946407	-1.40323718102787	0.438137458057222	-3.20273273883057	0.00136130251835683	0.0214676533715209
ENSG00000152642	892.175207145515	0.96318100859925	0.30094732312405	3.2004970125693	0.00137190791587284	0.0215362004494455
ENSG00000170584	552.889928138801	-0.598588518785855	0.187029479612484	-3.20050357850592	0.00137187665841431	0.0215362004494455
ENSG00000231863	7.276088623215	4.96622283064585	1.5516050755719	3.20070029985908	0.00137094046150156	0.0215362004494455
ENSG00000184564	440.165977560469	1.4732601376932	0.460231729133725	3.20112683335905	0.00136891261215337	0.0215362004494455
ENSG00000197122	2741.03081851947	0.567815595844273	0.177407211812342	3.20063423602473	0.0013712547935511	0.0215362004494455
ENSG00000135749	333.214580877568	-0.947350082185567	0.296145377545016	-3.19893590789396	0.00137935830190433	0.0216137154683643
ENSG00000269343	370.969844316063	-0.827156899003874	0.258553130162585	-3.19917573027926	0.0013782113267336	0.0216137154683643
ENSG00000088543	27.081569186234	1.85046387947347	0.578772565334704	3.19722113712032	0.0013875850544617	0.0217228397288567
ENSG00000132530	915.970533479675	-2.01859346486527	0.631785337351451	-3.19506222370964	0.00139800696049089	0.0218660997774961
ENSG00000169252	580.589959211349	0.809638464945994	0.253432107533012	3.19469570303174	0.00139978344753448	0.0218740001951233
ENSG00000117519	2406.29572092448	0.985366926172939	0.308471809557238	3.19435000425898	0.00140146092030721	0.0218803404118743
ENSG00000164675	10.40363354244	3.09930947622767	0.97035186469535	3.19400579211616	0.0014031330208259	0.0218865853339163
ENSG00000234840	13.4465486727616	3.1740441247182	0.993919430895726	3.19346219226012	0.00140577744614662	0.0219079718849208
ENSG00000153317	611.992639198071	-0.960567255913268	0.30089764618112	-3.19233888368496	0.00141125651901805	0.0219337564676654
ENSG00000171224	55.6566672981119	1.27485184466457	0.399320949837202	3.19254936457581	0.00141022837650306	0.0219337564676654
ENSG00000171346	34930.4679861605	-1.37154439269522	0.429616862591231	-3.19248267962008	0.00141055403980405	0.0219337564676654
ENSG00000278518	8.04244161386723	3.80275657001972	1.19155786563169	3.19141577568599	0.00141577382035409	0.0219642818568008
ENSG00000179361	188.551774443793	0.95612208229752	0.299588947043494	3.19144645265805	0.00141562348628786	0.0219642818568008
ENSG00000139793	1022.55290200793	-0.748814364765105	0.234719367324534	-3.19025384782058	0.00142147875554625	0.0220130890991659
ENSG00000125520	1361.6802250485	0.622888896746719	0.195232551240521	3.19049714194094	0.00142028245746761	0.0220130890991659
ENSG00000088881	76.700917488836	2.02229367250696	0.634533022383559	3.18705820054946	0.0014372785015307	0.0222377487579458
ENSG00000260228	8.5839505884639	3.95221490737576	1.24049534303157	3.18599737562672	0.00144255905817858	0.022299396761871
ENSG00000168743	787.966547326957	1.63744107615989	0.514357978958407	3.18346588007785	0.00145523262980556	0.0224387337729877
ENSG00000108771	634.800533010068	-0.895273666940478	0.281227533843069	-3.18344955312968	0.0014553147003696	0.0224387337729877
ENSG00000078804	1294.7907063672	0.684004688356571	0.214865030630796	3.18341559046852	0.00145548543392353	0.0224387337729877
ENSG00000250133	5.09387443840591	-6.1813111505054	1.94222743793132	-3.1825887276565	0.00145964785265081	0.0224827585540352
ENSG00000260917	188.645517806288	0.884218087039405	0.278066983664891	3.1798744150978	0.00147338891072659	0.02267411109933
ENSG00000065054	386.452135031638	0.967957872122589	0.304815933578457	3.1755488000874	0.00149553364677161	0.0229943310033114
ENSG00000178163	843.223405784858	-0.652177732753763	0.205494448385515	-3.17370000930756	0.00150509163201874	0.0231000013638559
ENSG00000165959	695.718514591909	-1.25828770812943	0.396472521592149	-3.17370722963705	0.00150505419473194	0.0231000013638559
ENSG00000130202	3303.34081137124	0.520704537347055	0.164121781105495	3.17267174313904	0.00151043194400503	0.0231613026707724
ENSG00000272636	5.30251004729706	6.27198799325635	1.97746732666672	3.17172774926632	0.0015153499494174	0.0232160248261143
ENSG00000163683	2145.78222349447	0.998419139072697	0.315133963917642	3.1682371733617	0.00153366349269376	0.023475694298751
ENSG00000167549	202.350283946743	-1.77601870349639	0.561209033525089	-3.16462957187411	0.00155280505127297	0.0237475652508012
ENSG00000175611	43.756774660026	-1.22748093499212	0.387969783274275	-3.16385705255906	0.00155693245269691	0.023789540718162
ENSG00000204020	15.9059212156662	-4.98282790090262	1.57510399872617	-3.16349136624144	0.0015588897554051	0.0237983125481319
ENSG00000180817	4310.96074066787	-0.821420516430021	0.259794982791451	-3.16180284778406	0.00156795681594906	0.0238943286256897
ENSG00000149531	265.811371063843	0.732693450795379	0.231726835886672	3.16188432812205	0.00156751816752717	0.0238943286256897
ENSG00000171291	43.3044699170707	-1.99221414040003	0.630615523560356	-3.15915810183725	0.0015822562954854	0.0240909022688729
ENSG00000064692	14.4067562890034	-4.0075597801315	1.26867304188912	-3.15885941279562	0.00158387875554709	0.0240942829258954
ENSG00000160182	48.7230481257144	4.37471651065604	1.3852616858897	3.15804339008073	0.00158831915109669	0.0241404867443627
ENSG00000115525	135.203114272209	1.72593530788803	0.546743779842731	3.15675344012966	0.00159536180865022	0.0242261252584528
ENSG00000116141	504.495378113987	0.702137139392789	0.222864247115799	3.15051493669131	0.0016298292260708	0.0247277000304657
ENSG00000123384	5373.8568191331	1.12534144371093	0.357338729296935	3.14922887291014	0.00163701932013286	0.0248149052007806
ENSG00000124249	47.8109895034131	-2.0542767474034	0.652621568886521	-3.14773039283445	0.00164543380047891	0.0249205004729223
ENSG00000172292	1534.31511245261	0.92162818877492	0.292855869786146	3.14703676401613	0.0016493422240132	0.0249577246826271
ENSG00000164506	1462.43195992014	-0.66482162581331	0.211311791514811	-3.14616435290935	0.00165427016946881	0.0250102972457916
ENSG00000142686	219.97676821432	-0.920950455503609	0.292836729455728	-3.14492808745441	0.00166127660498696	0.0250501875449611
ENSG00000075711	3973.10591465724	0.683848371574499	0.217422772447825	3.14524722445347	0.00165946531194513	0.0250501875449611
ENSG00000167755	421.371135348399	-1.36008867111355	0.432470385894116	-3.1449290297684	0.00166127125411589	0.0250501875449611
ENSG00000131398	106.823879190677	2.10700484208917	0.671319718476827	3.13860115247292	0.00169756333724743	0.0255749362673748
ENSG00000236008	7.95587763411344	3.68234942332088	1.17346061505589	3.13802557672164	0.00170090034401799	0.0255804112052705
ENSG00000163430	1381.07090561618	1.17533342713952	0.374537219614918	3.13809513604	0.00170049674073684	0.0255804112052705
ENSG00000279741	5.55784101338434	-4.28084926425873	1.36523287494786	-3.13561835699438	0.00171492213300779	0.0257687644527502
ENSG00000007306	1415.38877945978	1.32892058525716	0.424009724530561	3.13417478037436	0.0017233817190624	0.0258732831382797
ENSG00000151834	13.299945132856	-5.27741962033912	1.6850230940479	-3.13195684912618	0.00173645394634314	0.0260468091951471
ENSG00000124608	701.242604985084	-0.71013517871632	0.22676547499022	-3.13158420057969	0.00173865921894233	0.0260571706114136
ENSG00000244242	197.253260789042	-3.41031210078676	1.0897943235717	-3.1293171812547	0.00175213064619307	0.0262155234785232
ENSG00000232229	37.6697082368915	1.72307978335545	0.550629035181866	3.12929335952352	0.00175227271143863	0.0262155234785232
ENSG00000154240	63.9544956626702	1.66279102371596	0.531466347363531	3.12868544163641	0.00175590172645825	0.026246993226511
ENSG00000117335	8898.36753490473	0.553325172651914	0.17689589232284	3.12797072552754	0.00176017711911803	0.0262667000097229
ENSG00000002745	5.03796986149231	-6.16254432837845	1.970151439114	-3.12795463639578	0.00176027347347925	0.0262667000097229
ENSG00000237264	28.7981163923663	1.7991847869914	0.575577371471144	3.12587825055177	0.00177274927747728	0.0264299404843992
ENSG00000102226	551.05218774173	0.623421106076625	0.199643820162113	3.12266668495123	0.00179220589042042	0.0266968851469119
ENSG00000177465	23.7260107130304	1.83057215746669	0.586530567341188	3.12101748722985	0.0018022733142973	0.0268236266197968
ENSG00000204949	959.629734154972	-1.21729730324613	0.390111027627835	-3.12038680538768	0.00180613699149726	0.0268578970948232
ENSG00000198814	348.309038716405	0.878533773724572	0.281753777776508	3.11809048545018	0.00182026909134956	0.0270446716033412
ENSG00000163293	1681.82335553826	-0.758929135252895	0.243555522925313	-3.11604157498667	0.00183296428289393	0.0272097933452891
ENSG00000183439	7.64581053471706	-4.15324163872134	1.33335297103345	-3.11488535215268	0.0018401641792398	0.027293124744673
ENSG00000227640	207.331763930472	1.56647853272133	0.503008615466179	3.11421809598538	0.00184433105534201	0.0273313658976394
ENSG00000144741	75.6999724653139	-1.76343326688691	0.566435347076778	-3.11321190668541	0.00185063089362238	0.0273775619301573
ENSG00000176399	66.3804717763547	1.58515983947959	0.509161209102492	3.11327691729262	0.00185022325991793	0.0273775619301573
ENSG00000146426	71.0440623866318	0.99782416685483	0.320881879068148	3.1096307767598	0.00187321340004516	0.027687832085719
ENSG00000183496	107.648602118018	1.46471571754576	0.471115830095757	3.10903523927025	0.00187699329885596	0.0277198881603577
ENSG00000119866	301.632266545297	0.914014421729419	0.294032851216867	3.10854524569868	0.00188010855886865	0.027742082122929
ENSG00000113248	37.7624372602439	1.94655300081885	0.626432334615855	3.10736354631587	0.00188764106438013	0.0278293611933678
ENSG00000234420	141.978780493195	-1.05383117458801	0.339187073341865	-3.10693200718136	0.00189039872649726	0.0278461558984463
ENSG00000163364	29.2671718981766	-3.31112747238215	1.06592219723925	-3.10635005158725	0.00189412345391511	0.0278771548542425
ENSG00000162931	133.071212608463	-1.17633778061908	0.37888011620812	-3.10477570687007	0.00190423364116167	0.0280019998258005
ENSG00000107338	666.40775316393	0.699790933382664	0.225423474868362	3.10433921662911	0.00190704547312967	0.0280193999702784
ENSG00000255026	29.3647261196737	3.20550322192016	1.03277649577848	3.10377243771793	0.00191070230357667	0.0280252626880107
ENSG00000137486	295.031595692933	-1.07399352397199	0.346005927977219	-3.10397434590399	0.00190939886384778	0.0280252626880107
ENSG00000127191	541.14766624404	0.670018724053485	0.215915639775169	3.10315049317951	0.00191472246949482	0.0280603067186188
ENSG00000265190	6352.17492037473	0.587512683017845	0.18935383859299	3.10272391298432	0.00191748431591762	0.0280768660896704
ENSG00000175920	20.6878067302383	2.1912554817935	0.706420134483888	3.10191538268433	0.00192272909666477	0.0280819644381302
ENSG00000156486	20.6128183590239	2.37428488309928	0.765400714536076	3.10201550378534	0.00192207891644359	0.0280819644381302
ENSG00000179277	45.6615101706116	2.22364933302715	0.716834212881062	3.10204129918684	0.00192191143541802	0.0280819644381302
ENSG00000285820	62.1287798455642	-1.48637980444592	0.479304334093215	-3.10111905676372	0.00192790758348017	0.0281337149904803
ENSG00000105357	8288.32488673348	1.23166493964937	0.397305769931426	3.10004292125422	0.00193492601315016	0.0282122051324139
ENSG00000160299	859.054612579371	-0.501501842775557	0.161823269969632	-3.09907124525212	0.001941283316892	0.0282809309628508
ENSG00000046653	93.7314301701497	1.09306303947834	0.352780085219305	3.09842614499864	0.001945514547164	0.0283185937258516
ENSG00000184995	17.3498403892071	2.52179566202938	0.814028584392212	3.0979202823845	0.00194883843531292	0.0283429968550793
ENSG00000186377	42.2715981972875	2.91549724048338	0.942186874111748	3.0943938199436	0.00197215512406707	0.0286336952823409
ENSG00000148840	1198.14582218682	-0.547025182342851	0.176779149189567	-3.09439877299249	0.00197212219607794	0.0286336952823409
ENSG00000173338	34.1672333425512	-2.45352064841444	0.79301172783252	-3.09392731822575	0.00197525870198852	0.0286545750149346
ENSG00000232677	438.176302742676	-1.2451985991298	0.402689862114082	-3.092202501927	0.00198677266266138	0.0287973240615746
ENSG00000153250	2114.30486789392	-0.466634971793761	0.151006173498258	-3.09017148758587	0.00200040960177708	0.0289705784499787
ENSG00000110721	224.09264728896	0.977734044636063	0.316427360529602	3.08991625439607	0.00200212938922314	0.0289710985210968
ENSG00000152377	304.702720599792	1.44756622696996	0.468541519479476	3.0895153722516	0.00200483331384449	0.0289858463568861
ENSG00000240541	25.119119727837	1.89273176958623	0.613389276534486	3.08569425973624	0.00203077520243818	0.0293362614256498
ENSG00000138035	947.508230861052	-0.703955068205047	0.228199248284334	-3.08482641155736	0.00203670986419743	0.0293973097428833
ENSG00000166006	5.86130779513337	5.63854334542278	1.82806503735086	3.08443257226443	0.00203940832649493	0.029411584457121
ENSG00000149257	2761.09520881289	0.756609784437024	0.245365448752133	3.08360361365038	0.0020450988105935	0.0294689489415923
ENSG00000163840	3062.7837603853	-0.690689370249864	0.224023200027684	-3.08311536557156	0.00204845726038417	0.0294926419790039
ENSG00000249242	17.5644446929588	2.60465614157696	0.845225541415088	3.0816107819177	0.00205883849577342	0.0296173213376101
ENSG00000263535	108.606005777376	-1.61430104935232	0.523944530895359	-3.08105334469981	0.00206269690506726	0.0296480369688239
ENSG00000167996	24542.6411768391	0.935228366900696	0.303582458626209	3.08064033453334	0.00206555991155432	0.0296644059084241
ENSG00000065717	200.883650965154	1.48936331066953	0.483659412728693	3.07936384876063	0.00207443163317542	0.0297669693484429
ENSG00000234964	2950.92662321797	-0.629010930107127	0.204304309748286	-3.07879423044039	0.00207840181311651	0.029799085995558
ENSG00000157184	504.828650370414	0.645243702538648	0.209693656683436	3.07707783222427	0.00209040710922527	0.0299462567145885
ENSG00000249992	151.719673155494	1.45182251346908	0.472286198163385	3.07403121055599	0.00211187337604349	0.0302286035231516
ENSG00000101040	2546.84337830522	-0.583108574025109	0.189739901421321	-3.07319952027542	0.00211776842769655	0.0302877853686776
ENSG00000103855	1917.24721674687	0.826125745219293	0.268904167852345	3.07219390393725	0.0021249164260367	0.0303647733471441
ENSG00000167914	84.0995771649651	-4.01611055794029	1.30809504673637	-3.07019781778112	0.00213917034180445	0.0305430918927349
ENSG00000278616	27.5671551194797	1.62521124788233	0.529556820357071	3.06900257990536	0.00214774736547781	0.0306401272164558
ENSG00000224905	6.28052332521651	5.17745034294429	1.68743944567218	3.0682288222093	0.0021533166492963	0.030694128377086
ENSG00000144746	4536.12955896315	0.829832649044371	0.27083710739202	3.06395477722792	0.00218431926379966	0.0311102756073453
ENSG00000188042	1515.71049330615	0.766598956580246	0.250253893786656	3.06328483038022	0.0021892157802829	0.0311542245655643
ENSG00000177628	25.9285406798706	2.41503638123265	0.789058322091427	3.06065637180217	0.00220852402010924	0.031403021294198
ENSG00000135503	1602.98623516866	-0.566673344692624	0.18525826588038	-3.05882893807568	0.00222203989861739	0.0315691135059556
ENSG00000231809	6.69643599242055	-5.43834600689513	1.77806252865173	-3.0585797289249	0.00222388893582618	0.0315693144726811
ENSG00000164687	31143.8260097566	-0.603522424218316	0.197394411821748	-3.05744432503648	0.0022323310606459	0.0316630304191367
ENSG00000138101	279.851074848722	-0.746044629564607	0.244178455281663	-3.05532537137248	0.00224816481050376	0.03186134725265
ENSG00000197601	6332.29556564907	0.723992022941334	0.237016221067463	3.05460959456974	0.00225353661591154	0.0319111913388955
ENSG00000129038	137.349119121622	1.07423065847308	0.351926213014987	3.0524315005411	0.00226995533185433	0.0321089472611319
ENSG00000086696	73.2994289741591	2.34596471689634	0.768598630932625	3.05226241952803	0.00227123445607658	0.0321089472611319
ENSG00000262519	14.3215907544015	2.81800647673977	0.923501590977752	3.05143651540029	0.00227749204525888	0.0321709775358613
ENSG00000079156	286.106745918374	-1.72844042161781	0.56693292584874	-3.04875646273359	0.00229790681326968	0.0324327208550491
ENSG00000244128	41.964281377415	-3.04552001454296	0.999561671619528	-3.04685553779637	0.00231248818847565	0.0326117699038718
ENSG00000127423	62.6836601901705	-2.19065867540168	0.719633463840548	-3.04413119383102	0.00233353352972404	0.0328816088279296
ENSG00000184792	2276.75783842226	-1.00695260664008	0.330864003798361	-3.04340331701286	0.00233918593465037	0.032934283147021
ENSG00000226124	8.59639536255162	-3.10434656443746	1.02045976274162	-3.04210580150379	0.00234929303458511	0.0330495393786074
ENSG00000166741	84.5672491502728	1.85950496319413	0.611873319261709	3.0390358668324	0.00237336596396619	0.0333336827837048
ENSG00000173451	141.769527411367	0.866648460920682	0.285151182361982	3.03925957361286	0.00237160416502907	0.0333336827837048
ENSG00000168952	13.5964493919534	-3.63042457761197	1.19481598565242	-3.03848008497275	0.00237774820223344	0.0333679916961063
ENSG00000049246	282.581257473408	0.861022249579939	0.283480074821418	3.03732899083772	0.00238684793732029	0.0334599553935212
ENSG00000163121	7.87088451769285	4.65459582145813	1.5326736097868	3.03691261579535	0.00239014734749662	0.0334599553935212
ENSG00000101811	614.22085352176	0.556794516615858	0.183353376749691	3.03672900104795	0.0023916036608563	0.0334599553935212
ENSG00000207864	16.5030321010798	2.75867921334927	0.908455713412115	3.03666890154481	0.00239208050764494	0.0334599553935212
ENSG00000244300	36.8728018199987	2.15432893550947	0.70961014784517	3.03593309939463	0.00239792563401527	0.0335144683454368
ENSG00000116815	529.714049399548	0.535157852939563	0.17629292467711	3.03561730523066	0.00240043827343807	0.0335223542974853
ENSG00000121060	2784.36226343803	-0.729311558873782	0.240381896526467	-3.03397040048513	0.00241358109346407	0.03367855856695
ENSG00000167747	751.067810204079	-0.791316254198846	0.260903169956055	-3.03298827044582	0.00242145011920057	0.0337609799844779
ENSG00000182197	1571.78811054033	-0.784269540803983	0.258686703389417	-3.03173503132619	0.00243152542406794	0.0338740039846874
ENSG00000163002	211.584622676385	-0.642874203742764	0.212138226017914	-3.03044960736344	0.00244189932121987	0.0339910014737765
ENSG00000105792	57.7491461144357	1.23415014730763	0.407618475232738	3.0277090522037	0.00246415208475241	0.0342730287939897
ENSG00000268655	11.634673958957	2.70374353005444	0.894569770773657	3.02239536634034	0.00250782765060417	0.0348523220748343
ENSG00000168542	810.579085246706	1.11614454991808	0.369550182445249	3.02027871433522	0.00252542172715118	0.0350685075186731
ENSG00000168434	508.686716245967	0.595277112991469	0.197155208575827	3.01933241983065	0.00253332399632179	0.0351498704489648
ENSG00000179163	1436.95444608741	0.980540039301678	0.324786787431373	3.0190268731571	0.00253588036650349	0.0351569876758199
ENSG00000248323	72.0340508541789	-1.76488779498868	0.584840831079751	-3.01772328674504	0.00254681340963493	0.0352801326189766
ENSG00000168564	1241.6817488673	1.23823203245468	0.410718064190261	3.01479808270883	0.00257150386603958	0.0355935028280056
ENSG00000277203	86.8582238821805	1.48649191494076	0.49313538298255	3.01436880466831	0.00257514558882386	0.0356152571187416
ENSG00000147036	75.1078976149703	0.934929056083569	0.310189064849919	3.01406194488488	0.00257775168250955	0.0356226648173308
ENSG00000039523	919.975854857242	0.626012878190924	0.207790431619968	3.01271272844675	0.00258923892334196	0.0357526931589875
ENSG00000253768	16.5161143649715	-2.38151709278804	0.791279374583567	-3.00970449791059	0.00261501973178534	0.0360797229233094
ENSG00000138162	3762.17399672022	0.902351277081905	0.299861667505487	3.00922516902029	0.00261914923211019	0.0361077424186345
ENSG00000187091	1533.0624719217	-1.01804184616762	0.338346414724127	-3.00887434258078	0.00262217543934892	0.0361205191625286
ENSG00000128284	206.254313489848	-1.40000315462938	0.465342054659183	-3.00854638133823	0.00262500730320373	0.0361306005212961
ENSG00000248122	6.43443740483454	3.94300440950667	1.31147466347297	3.00654257327781	0.002642370498988	0.036340515135962
ENSG00000231298	126.933732824135	1.77752033935713	0.59130750106916	3.00608454339434	0.00264635408547869	0.0363662316618698
ENSG00000084234	31706.121588441	0.717709342868411	0.238780906310899	3.00572333842278	0.00264949943501883	0.0363744022492876
ENSG00000160223	75.289074277771	-1.38044202568073	0.45930056772572	-3.00553084990978	0.00265117700788182	0.0363744022492876
ENSG00000169692	986.243383234509	0.599040039853589	0.199361890294523	3.00478711838362	0.00265766789161721	0.0364344032472303
ENSG00000229676	13.7478853304714	-2.88119541008877	0.959072240815012	-3.00414847544784	0.00266325320713467	0.0364819040037834
ENSG00000130055	157.172897639062	2.11368413799597	0.704126249560692	3.00185391371889	0.00268340915562887	0.036728762547808
ENSG00000133056	746.608092318932	-0.909614553801639	0.303301128082205	-2.9990477106142	0.00270824893500879	0.0370392869052673
ENSG00000135047	1686.43292895528	-0.935842057176595	0.312084759032305	-2.99867914113589	0.00271152697934792	0.0370546637646393
ENSG00000100292	265.07926218644	1.12769921045766	0.376238388713273	2.99729970222964	0.00272382786298507	0.0371932209386176
ENSG00000230526	5.97447477726386	-5.18381756976419	1.73141841507463	-2.99397160422413	0.00275371571450612	0.0375715137732575
ENSG00000120756	970.342101918486	1.04810756368255	0.350117061434435	2.99359179866424	0.002757145520488	0.0375885013312172
ENSG00000164318	9.2858441123494	4.69992244087358	1.57136398120342	2.990982673075	0.00278081271457175	0.0378212511890963
ENSG00000068383	507.497266841301	0.589997363638003	0.19723874618044	2.99128530810197	0.00277805805201583	0.0378212511890963
ENSG00000133477	2100.93294685266	-0.499821126666771	0.167103457946848	-2.9910878733925	0.00277985487122302	0.0378212511890963
ENSG00000159840	180.499514280378	-1.37651858287215	0.460342902378455	-2.99020268534625	0.00278792387008056	0.0378880175234882
ENSG00000197256	324.775389924031	1.04017869749506	0.348054913942817	2.98854765678141	0.00280306782055864	0.0380637583683595
ENSG00000069020	5474.51096991463	0.520460872170676	0.174302708354357	2.98595975406521	0.00282689844685867	0.0383268619213581
ENSG00000137648	7294.49112629896	0.900046353913069	0.301412894644872	2.98609107275756	0.00282568476098843	0.0383268619213581
ENSG00000149380	62.8598772823955	1.4228542774831	0.476706279358937	2.98476092951098	0.00283800036338647	0.0384470836630426
ENSG00000137941	222.178014645591	-0.998635093240573	0.334740999948134	-2.98330677567225	0.00285152022430382	0.0385993093927622
ENSG00000136161	319.488165468605	0.873130571888414	0.29269526769668	2.98307034056061	0.00285372400741607	0.0385993093927622
ENSG00000167565	605.694372419538	0.523200343220873	0.175423614892155	2.98249664700229	0.00285907780133607	0.0386413460895421
ENSG00000183421	4416.60734269384	0.715620224869002	0.239993828873778	2.98182760876478	0.00286533294762262	0.0386954892965833
ENSG00000145103	233.353378629462	0.776356036473056	0.260574214987153	2.97940468327357	0.0028880906861045	0.0389722354936689
ENSG00000180257	194.089266276196	0.806402888067566	0.270758748475164	2.97830778362286	0.00289844765682194	0.0390813416423366
ENSG00000126947	116.454154386786	-1.40890175424391	0.473237595343983	-2.97715517132535	0.00290936718666981	0.0391978562620627
ENSG00000171517	902.655590004275	-1.08544813656193	0.364650782592576	-2.97667847808982	0.00291389421172517	0.0392281298221686
ENSG00000114013	90.9311494148851	-1.84621789123604	0.620434655983244	-2.97568466466499	0.00292335286568579	0.039324695898455
ENSG00000173894	163.637057316279	-1.2231347592316	0.411183749926223	-2.9746670666121	0.00293306691819605	0.0394245440059086
ENSG00000101977	30.1266561886464	1.99243605070089	0.669929713406271	2.97409714904315	0.002938520245988	0.0394670107979887
ENSG00000021645	5.98500578921839	6.49352854786891	2.18429949632038	2.97281968832926	0.0029507774183671	0.0396007219056209
ENSG00000072121	797.087494904625	-0.513288359146262	0.172680287698498	-2.97247801696086	0.00295406363666091	0.0396139242936484
ENSG00000110172	43.4737533357451	-2.78174278539814	0.936540880318935	-2.97023103193406	0.00297575861992642	0.0398737749656028
ENSG00000166592	375.356298243853	3.14328845182595	1.05846660771015	2.96966236717286	0.00298127216685769	0.0399165662496393
ENSG00000068078	9958.38075825855	-0.80743678033994	0.27198297752066	-2.96870336408685	0.00299059139487884	0.0399349998628332
ENSG00000157404	13.8556047693274	3.91601723088814	1.31912287363961	2.96865235918729	0.00299108778467727	0.0399349998628332
ENSG00000171243	9.83134464684284	4.06837326970488	1.37048459632478	2.96856548451185	0.00299193343930206	0.0399349998628332
ENSG00000111229	5605.82764937519	0.477647632002044	0.160899504577522	2.96860846934375	0.00299151498950894	0.0399349998628332
ENSG00000174804	33.5412232159767	1.48665088183966	0.500857476093149	2.96821142301003	0.00299538219781146	0.0399500393126714
ENSG00000079257	409.462254190284	-0.936806384167966	0.316517511082954	-2.95973003503886	0.00307908731652277	0.0410055608930878
ENSG00000128285	6.79310153060243	-4.16648206054848	1.40773332783171	-2.95970975338489	0.00307929001301188	0.0410055608930878
ENSG00000226476	51.847687271522	5.79433368785934	1.95996948663947	2.95633872229012	0.00311314995151378	0.041424396686616
ENSG00000235831	38.3858153224565	-1.53035024753217	0.517745146971174	-2.9557983430357	0.00311860919034943	0.0414649699536028
ENSG00000129151	445.390026119944	-0.758527305420219	0.256663477161508	-2.95533791487952	0.00312326759977136	0.041494840968391
ENSG00000145632	5577.62605945055	-0.68706734861213	0.232622402350742	-2.95357343776455	0.00314117860160521	0.041668448604948
ENSG00000173391	15.913036407003	-2.42434704318394	0.820808456724501	-2.95360875405509	0.00314081919365605	0.041668448604948
ENSG00000104368	8921.4596328	-1.08190442629132	0.366442393770771	-2.95245431391899	0.00315258717302912	0.0417875672665378
ENSG00000198838	41.4917883364734	-1.59310578980906	0.539807356835202	-2.95124875501728	0.00316491912889183	0.0419187325731978
ENSG00000156804	891.859839201502	0.933213226584483	0.316386970670156	2.94959436732744	0.00318191383814398	0.0420481300304744
ENSG00000184156	5.14157886780328	-5.81076486978556	1.97002861415504	-2.94958399488926	0.00318202065095482	0.0420481300304744
ENSG00000226054	52.3949419899597	-1.30180961135568	0.441297226898056	-2.9499610058878	0.00317814038323268	0.0420481300304744
ENSG00000050165	1462.97045431049	0.975100000967501	0.330861447237122	2.94715509803312	0.00320712300207091	0.0423473148508288
ENSG00000116032	413.31613660368	1.50763147187089	0.511670901513554	2.94648663312926	0.00321406310134353	0.0424064077136622
ENSG00000145416	32.4242822797159	-1.56256580449285	0.530490085591402	-2.94551368052594	0.00322418889359842	0.0424786583001907
ENSG00000128973	283.645558667852	-0.700535472953866	0.237833574884309	-2.94548603280522	0.00322447705550997	0.0424786583001907
ENSG00000232187	86.3274490459628	1.14766648459546	0.389681928669089	2.94513653357026	0.00322812178001752	0.0424941355969406
ENSG00000108479	319.734107036519	-0.851125816039403	0.289057168706439	-2.9444895618686	0.00323487857994128	0.0425505244402827
ENSG00000132329	31.2987528560973	-1.45273733667239	0.493491348550353	-2.94379494380166	0.00324214732857704	0.0425902694001187
ENSG00000069956	5632.96770777724	-0.679912353103898	0.230969847420223	-2.94372776662434	0.00324285108480997	0.0425902694001187
ENSG00000203783	5.26885119283173	-6.36305164817958	2.16409062306964	-2.94028890488604	0.00327906348841754	0.0430043874185509
ENSG00000171860	6.34771137872432	4.04251790895028	1.37493702008556	2.940147693964	0.0032805583318938	0.0430043874185509
ENSG00000101384	12174.5599723811	0.962006113132766	0.327236682107449	2.9397869057262	0.00328438041662168	0.0430043874185509
ENSG00000011478	199.394049579551	0.860783799873591	0.292802920124529	2.93980606309356	0.00328417736716027	0.0430043874185509
ENSG00000184185	8.69024130258999	3.38076126594936	1.15013827549054	2.93943896833401	0.00328807020509541	0.0430199603640049
ENSG00000187189	334.914099783019	-0.640685734716657	0.2180277951662	-2.93855072115127	0.00329750697370196	0.0431106439836947
ENSG00000138835	847.941939232999	-0.566945885963851	0.192954882998623	-2.93823031142413	0.00330091706764777	0.0431150329450722
ENSG00000203485	2668.90331767682	0.667080154308932	0.227048729044271	2.93804839655748	0.00330285460166261	0.0431150329450722
ENSG00000227110	5.21051336177829	4.72105358284621	1.60760082777276	2.93670760880793	0.00331716701242606	0.0431498332148638
ENSG00000168016	618.619113570381	1.0393374581164	0.353943916561245	2.93644673487857	0.00331995830056343	0.0431498332148638
ENSG00000184613	16.5342435621556	3.2160578046454	1.0952421465935	2.93638974234895	0.00332056839154197	0.0431498332148638
ENSG00000251363	13.2970131016751	4.00980427826745	1.36513543663986	2.93729411063943	0.00331089938725383	0.0431498332148638
ENSG00000258484	26.0385088708438	-1.74287377226082	0.59338014020576	-2.93719599657727	0.0033119471268723	0.0431498332148638
ENSG00000277449	7.06357138020519	-4.70084304003974	1.60065646018101	-2.93682195835334	0.00331594417379907	0.0431498332148638
ENSG00000113580	1604.41987233325	-0.653698664905157	0.222695529745099	-2.93539194816075	0.00333126608834887	0.0432561758868244
ENSG00000278934	8.09466314211003	4.45772881316823	1.52024023500567	2.93225288380267	0.00336512610423267	0.0436628918727926
ENSG00000116675	18.8503428040578	2.23238611127386	0.761952126451075	2.92982463566522	0.00339153343763701	0.0439723683455499
ENSG00000225969	22.8685855327338	2.18839064329389	0.747186468602641	2.92884137394315	0.00340228002617843	0.0440784848271084
ENSG00000095321	832.108872167271	1.02662006402741	0.350567987545392	2.92844783465713	0.00340658990585903	0.0441011131153534
ENSG00000135372	1094.22709055166	-0.428923043147358	0.146495096377003	-2.92790034448341	0.00341259405951992	0.0441456246571732
ENSG00000082781	2864.32164358578	0.865495919695655	0.295676460815627	2.92717221150501	0.00342059419262158	0.0442158700856907
ENSG00000269113	29.5031432958481	2.18506130726907	0.747207726151555	2.92430234698332	0.00345229246026079	0.0445921109450353
ENSG00000224596	16.1562989156064	2.86511739304407	0.980013667863735	2.92354840243152	0.00346066416766228	0.044666711931455
ENSG00000256433	30.2586305303362	-1.70607738396159	0.583790544249465	-2.92241352787748	0.00347330051776838	0.0447962034544266
ENSG00000130600	49.7068865890212	2.50370123931614	0.857234232935703	2.92067342054448	0.00349275745230855	0.0450134022224484
ENSG00000173068	24.6168038901798	2.63742966756417	0.903295084949439	2.91978746647536	0.00350270176779964	0.0451077723914617
ENSG00000164509	42.0054512494306	2.41131118186559	0.82641486088995	2.9177974598241	0.00352513242003173	0.045362680094724
ENSG00000168243	80.5365497809721	1.84133995572771	0.63113109260588	2.91752375584126	0.0035282277178507	0.0453685783898514
ENSG00000074966	11.424277756274	-3.0268051291983	1.03757642567671	-2.91718764449009	0.00353203215877794	0.0453835797548727
ENSG00000170113	625.457396306034	0.813027356255068	0.279087505636912	2.91316286051444	0.00357787948355326	0.0459383705332342
ENSG00000133019	8.29479398041685	4.61218465507863	1.58349622302798	2.91265908185064	0.00358365611417897	0.0459782277736384
ENSG00000154096	78.1852893761377	1.40316804858845	0.481802973801052	2.91232749669132	0.00358746289829664	0.0459927713600549
ENSG00000137767	1523.78248920298	0.708701952035642	0.243372281214409	2.91200768016503	0.00359113805629203	0.0460056070428179
ENSG00000003096	78.7722905949455	1.69025866941326	0.580602932955261	2.9112127643067	0.00360028763716126	0.0460885035694639
ENSG00000075275	4504.81162451696	0.689857660710678	0.237026880073574	2.91046171850443	0.00360895174311041	0.0461650667213491
ENSG00000136153	8546.78560562155	0.8758738033728	0.300997557154781	2.90990336151599	0.00361540526530433	0.0461789514399117
ENSG00000221926	3314.79873006925	0.563245465581358	0.193559260062433	2.90993810060899	0.00361500344288485	0.0461789514399117
ENSG00000151917	18.5703645611246	-2.49212116292679	0.85670916499151	-2.90894654191249	0.00362648864907185	0.0462726691347996
ENSG00000130545	550.811165348878	0.788284782555384	0.271021040143331	2.90857411711835	0.00363081100447425	0.0462726691347996
ENSG00000273145	17.9251096179256	2.04427331284233	0.702793029390088	2.90878427553049	0.00362837133414943	0.0462726691347996
ENSG00000153721	372.558149700263	0.824081263635376	0.283400245781598	2.90783538794265	0.00363939854825182	0.0463477809198168
ENSG00000280032	207.245497415874	-1.14771865276749	0.394795518597246	-2.90712178508375	0.00364771153971445	0.0464192877520614
ENSG00000231131	11.7272671466218	-4.60852206042381	1.5857566864273	-2.90619746387876	0.00365850492488099	0.0464933557177976
ENSG00000148798	102.446394619453	-1.39839583310399	0.481183268703754	-2.90616055057586	0.00365893656738727	0.0464933557177976
ENSG00000181444	172.432075154312	0.902859147516394	0.310733317874659	2.90557560319484	0.00366578278283063	0.0465459725303329
ENSG00000162975	7.577394664442	4.0469376513014	1.39301314570785	2.90516831357321	0.00367055657085071	0.0465722166677628
ENSG00000148158	763.495354419027	-0.744616058202175	0.256379672075793	-2.90434905456173	0.00368017612229533	0.046659860120922
ENSG00000197461	272.740165179692	1.07652501113694	0.370845165934458	2.90289616806602	0.00369729196844438	0.0467734619978571
ENSG00000105516	383.591191322972	0.906740045738699	0.312333395759659	2.90311589490238	0.00369469882253664	0.0467734619978571
ENSG00000128274	2344.47365530958	0.869459341074519	0.299477403539548	2.90325523995569	0.00369305517367017	0.0467734619978571
ENSG00000198734	7.99713287200439	-4.20071373798277	1.44803516589269	-2.90097494655325	0.00372003619343513	0.0470266147744684
ENSG00000130529	2128.68513085612	0.626332567623769	0.215972274922366	2.90006005562016	0.0037309116969726	0.0471294682425944
ENSG00000271824	5.83229312993435	3.4031005580634	1.17380247292712	2.89921058828328	0.00374103536306634	0.0472148519506098
ENSG00000119900	1772.95601832658	-0.929995443327879	0.320845940159742	-2.89857319953886	0.00374864793749102	0.0472148519506098
ENSG00000168615	6592.90609342883	0.910360194503977	0.314064344175004	2.89864230495615	0.00374782190541757	0.0472148519506098
ENSG00000130193	650.957093818679	0.786465372182901	0.271311236274172	2.89875709898038	0.00374645011316407	0.0472148519506098
ENSG00000101608	5082.78700863788	0.671753329875023	0.231805497273069	2.89791802945765	0.00375648755327983	0.0472789819708702
ENSG00000154153	17.3911454074709	-2.32624570741841	0.803045189820458	-2.89678057587084	0.00377013346408932	0.0473839895799236
ENSG00000253837	6.90145007835736	5.1833280121878	1.78935147988186	2.89676347574263	0.00377033895582188	0.0473839895799236
ENSG00000262655	8.27331594166386	-4.00889769952296	1.38483634913816	-2.89485302867582	0.00379336094047339	0.0476385218838283
ENSG00000204789	245.430986440827	0.745850495857618	0.25779152223045	2.89323128008404	0.00381300411024752	0.0478502813397583
ENSG00000170310	558.708771085147	0.539490560107131	0.186499860413738	2.89271294311055	0.0038193018479203	0.0478943792226448
ENSG00000107798	1401.8256655137	-0.68252234202975	0.235966546069665	-2.89245383889396	0.00382245347764646	0.0478989891354023
ENSG00000178053	134.529319283258	0.840051896428992	0.290562022075497	2.89112765126173	0.00383862167187871	0.0480641074029501
ENSG00000111728	34.5489342173434	1.97998968386422	0.684900644565906	2.89091519999831	0.00384121753438282	0.0480641074029501
ENSG00000148143	652.067721467242	-0.579688322615532	0.200540623792139	-2.89062790198748	0.00384473045801685	0.048073101402747
ENSG00000186615	62.9727460954768	-1.29524667680039	0.44825887495727	-2.88950592874231	0.00385847731047117	0.0481749652588218
ENSG00000167693	4124.25472480823	0.572434952765843	0.198096146039977	2.889682430522	0.00385631178649177	0.0481749652588218
ENSG00000067992	295.55886707021	0.965051208002885	0.334401116081153	2.88590905231514	0.00390284921182533	0.0486936335674074
ENSG00000101773	1612.04175178935	0.790798224574087	0.274120700173321	2.88485409556476	0.00391595102490428	0.0488216937561435
ENSG00000088387	3166.90457303395	0.82546559653435	0.286166076992458	2.88456830806017	0.00391950717262151	0.0488306451158241
ENSG00000144642	108.517884407507	1.23055012219965	0.426733955120958	2.88364707666831	0.00393099033199825	0.0489028840650975
ENSG00000180346	252.678832999191	0.778515519946237	0.269967621250841	2.88373663604229	0.00392987263413538	0.0489028840650975
ENSG00000196498	4172.91091876851	0.608806601443927	0.211158688200676	2.88317097738996	0.00393693688252649	0.0489414733120435
ENSG00000168404	318.128416162098	-0.741626688233484	0.257253985935931	-2.88285790999633	0.00394085159160963	0.0489547665224865
ENSG00000162552	261.646507553433	1.32267655842084	0.45895213517378	2.88194880697093	0.00395223939341618	0.0489561921281489
ENSG00000124570	2594.33020349045	0.484710470999373	0.168177440899027	2.88213727363345	0.00394987612933272	0.0489561921281489
ENSG00000175505	211.117468690724	1.00212515548527	0.347711468604945	2.88205954064701	0.00395085070095939	0.0489561921281489
ENSG00000176834	443.585648707359	-1.05176861804694	0.36495158466709	-2.88194013188453	0.00395234820494036	0.0489561921281489
ENSG00000108576	6.83973506880051	3.06897803757293	1.06502114709995	2.88161230030948	0.00395646218764029	0.0489718934808282
ENSG00000134317	3462.40044399029	-0.791658153103237	0.274820209806484	-2.8806402326113	0.003968683607073	0.0490878515166721
ENSG00000142185	7.27218190796319	-3.74895466481185	1.30223683887814	-2.87885778752929	0.0039911826725632	0.0493306737654094
ENSG00000137124	277.962779653228	1.17587241315502	0.408643326814909	2.8775030350309	0.00400836054420472	0.049507425099097
ENSG00000143149	1503.09327182895	0.888388446119848	0.308816126562678	2.87675535603721	0.00401786961673453	0.0495537252730593
ENSG00000128815	6.97332018434876	3.66818209868902	1.27509286380223	2.87679603801623	0.00401735169199564	0.0495537252730593
ENSG00000132031	25.1601825600815	1.50142533032142	0.521982249048833	2.87639154982254	0.00402250395129829	0.0495753441848761
ENSG00000171843	600.800777570876	0.639366659727564	0.22235264797758	2.87546231422453	0.00403436302586012	0.0496503689985145
ENSG00000173588	150.251271845437	-0.735143860679004	0.255659624518752	-2.87547891874919	0.00403415083768033	0.0496503689985145
ENSG00000177694	224.649025221898	1.44046293636311	0.501099510852322	2.87460455491768	0.00404533806776465	0.0497498509334459
ENSG00000197747	16427.3027722389	0.716578800785444	0.24932099105448	2.87412141975989	0.00405153171341132	0.0497650855720789
ENSG00000105429	1579.36024793087	0.638486932889884	0.222155300068456	2.87405671930014	0.00405236180682839	0.0497650855720789
ENSG00000167815	2855.51050260264	0.511038188911675	0.177869027213059	2.87311510564192	0.00406445999832656	0.0498780558282514
ENSG00000184330	406.506791779461	-4.64091896376773	1.61546823209877	-2.87280113069037	0.00406850134395699	0.049890756607488
ENSG00000189058	22.4899796702045	4.27201907968056	1.48740217021807	2.87213449409869	0.00407709408835385	0.049890756607488
ENSG00000075239	267.276453312497	-0.790362552645746	0.27516863432726	-2.87228431604513	0.00407516149504152	0.049890756607488
ENSG00000178718	174.090011915923	0.891624834666433	0.310435574306842	2.87217351509183	0.00407659066604371	0.049890756607488
ENSG00000091127	384.777220748498	-0.585348206189126	0.203958604345929	-2.86993631902057	0.00410554473068557	0.05020319622704
ENSG00000116679	5457.16310606721	0.713683854641539	0.248779003681619	2.86874633341201	0.00412102158663275	0.0502823385771458
ENSG00000163491	15.1099664429232	-2.09339807855943	0.729778174263738	-2.86854026659735	0.00412370704634425	0.0502823385771458
ENSG00000254560	8.68160524677448	4.19122809218825	1.46094335143151	2.86885051913988	0.00411966444384735	0.0502823385771458
ENSG00000126458	1595.83175251611	0.638151689139573	0.222439943729937	2.86887183317376	0.00411938685323094	0.0502823385771458
ENSG00000113460	555.476614070895	-0.595291555944488	0.207560475578963	-2.86803908250836	0.00413024509905909	0.0502907763123225
ENSG00000140961	325.52502732264	1.08691820215663	0.378966500554312	2.8681115628078	0.00412929899676852	0.0502907763123225
ENSG00000144730	122.493674848742	-0.832387391436747	0.290298095143212	-2.86735395568513	0.00413919794165508	0.0502930088885421
ENSG00000170522	840.182723331194	-1.12790742948342	0.393339879157957	-2.86751354044749	0.00413711100826331	0.0502930088885421
ENSG00000108578	391.232599613735	1.10973449977109	0.386984735069882	2.86764411927177	0.00413540410368577	0.0502930088885421
ENSG00000146233	86.9644567159933	1.64541864936121	0.573899195583342	2.86708652325034	0.00414269737016495	0.0503000058247621
ENSG00000169605	16.3553778723215	-4.3036181657838	1.50177015078166	-2.86569696670547	0.00416092335570741	0.0504856744252088
ENSG00000197915	21.2377485906007	-1.55850910493525	0.543973067712399	-2.86504828536703	0.00416945660507413	0.050517958373451
ENSG00000179750	57.2418834810104	1.66424543329006	0.580839797847992	2.86524001877295	0.00416693274615173	0.050517958373451
ENSG00000101333	37.1191745865351	1.58980544328705	0.555101450198531	2.86399079432861	0.00418340169294899	0.0506512499135732
ENSG00000239557	9.57804336100126	2.69665581642492	0.942036644228615	2.86258059380808	0.00420206377835547	0.0508414256727186
ENSG00000169436	501.124166951046	1.74664897955839	0.61048314960768	2.86109285846931	0.00422183376423125	0.0510447293841171
ENSG00000166783	32.6153655919924	-1.68822885603904	0.590309868789125	-2.85990281596007	0.00423770850857539	0.0512006846137919
ENSG00000124772	10.8042540992859	2.98280533382603	1.04322946082618	2.85920350779187	0.00424706226637244	0.0512776886266231
ENSG00000002079	56.4890012028916	1.88682240260696	0.660141966757786	2.85820701852039	0.00426042339211456	0.0514029344048604
ENSG00000175854	240.988716299368	0.646439128632733	0.226200661480574	2.85781272433745	0.00426572068423376	0.0514307809195809
ENSG00000115107	803.766747586249	-0.848492377670477	0.296966378898906	-2.85720013429305	0.00427396260323646	0.0514580312027175
ENSG00000137831	1012.77424305417	0.79655924822902	0.278786767704228	2.85723477763518	0.00427349611925032	0.0514580312027175
ENSG00000171621	912.097795763481	0.756508804555254	0.264910835783875	2.85571106337244	0.00429405713398521	0.0516277099861744
ENSG00000165732	5759.85200971128	-0.648156074080931	0.226957726358802	-2.85584493852502	0.00429224703356265	0.0516277099861744
ENSG00000106123	28.7789078228395	-2.14778262840369	0.752217508660558	-2.85526806232967	0.0043000518025879	0.0516528476752365
ENSG00000105438	2921.06054720839	0.480088688924354	0.168151163588992	2.85510179458421	0.00430230368744816	0.0516528476752365
ENSG00000159958	45.8825026884093	1.57689328529054	0.552347902329283	2.8548914165161	0.00430515452288806	0.0516528476752365
ENSG00000105880	129.27217328293	-1.29772472318585	0.454772906126332	-2.85356648495095	0.00432314808091812	0.0518325872698232
ENSG00000097046	80.8215195033852	-1.32420101079851	0.464206832973382	-2.852609907348	0.0043361814733128	0.0519164942577221
ENSG00000215834	5.78995146919193	5.38610293707258	1.88803956612872	2.85274897502088	0.00433428446262314	0.0519164942577221
ENSG00000283000	209.806001561729	-1.42277601960368	0.498869089126403	-2.85200276107541	0.00434447232568467	0.051979587179002
ENSG00000135074	1488.08408098478	2.68945839654079	0.943350289523513	2.85096472265805	0.0043586804974631	0.0520771513603143
ENSG00000231638	17.8387321241386	2.73537841413144	0.959409643960252	2.85110581423837	0.00435674683319444	0.0520771513603143
ENSG00000111432	77.860088846679	-2.06134527764147	0.723556737673756	-2.84890620225404	0.00438698119884092	0.0523789115378613
ENSG00000244198	15.7677204852848	-2.56750915069926	0.901410122279286	-2.84832518211257	0.00439499919463539	0.0523862082378334
ENSG00000134463	249.025597443419	-3.81801593951242	1.34033740306017	-2.84854838102359	0.00439191751136404	0.0523862082378334
ENSG00000153930	28.5940532504915	-3.16687905998785	1.11188783421892	-2.84820011742689	0.00439672680589547	0.0523862082378334
ENSG00000159335	1006.90011775088	1.03715344120861	0.364253884370769	2.84733666739131	0.00440867108578032	0.0524921702635643
ENSG00000115170	783.953284394432	0.817782923664813	0.287249142112577	2.84694644394903	0.00441407876854912	0.0525202110739195
ENSG00000065989	43.03517128238	2.49193631618426	0.875637408811481	2.84585410708596	0.00442924826088225	0.0526642821896884
ENSG00000143365	168.64849449045	1.18606748505442	0.416889747246455	2.84503874918575	0.00444060207024668	0.0526981880381456
ENSG00000135914	6.67819769194124	3.38993531167645	1.19154580851585	2.84498949805281	0.00444128873323517	0.0526981880381456
ENSG00000185112	478.608363351414	-1.17627653042791	0.413402818420304	-2.84535198604281	0.00443623714976179	0.0526981880381456
ENSG00000122203	2380.23935451201	0.519704704971133	0.182688157097585	2.84476406805903	0.00444443292343496	0.0526991512389376
ENSG00000173890	109.250004481597	1.51819524537944	0.533760549598637	2.84433768385666	0.00445038544356674	0.0527333895017671
ENSG00000120729	5.80407380974597	-4.38638025583431	1.54234760838019	-2.84396346971418	0.00445561559715293	0.0527590270812225
ENSG00000224566	8.16407755389291	-4.65960961289499	1.63892646196215	-2.84308644776924	0.00446789500614328	0.0528317069283128
ENSG00000247774	7.042127245565	4.15118111547095	1.46007801089982	2.84312282253511	0.00446738510481537	0.0528317069283128
ENSG00000171132	192.892765099427	-0.662599097478562	0.233171188671077	-2.84168512094029	0.00448757899495841	0.0529639149609735
ENSG00000151689	726.939625884291	-0.798860957345357	0.281149038622993	-2.84141450832628	0.00449138924313051	0.0529639149609735
ENSG00000272568	6.78499745822224	4.89848691159029	1.72393580619492	2.84145551939213	0.00449081161552088	0.0529639149609735
ENSG00000167080	234.385984311212	3.55382151365143	1.25044726598269	2.8420402925657	0.00448258259328994	0.0529639149609735
ENSG00000171603	8448.21240099223	0.605108121439806	0.212991643743345	2.84099465502488	0.00449730661452868	0.0529973700705246
ENSG00000186496	53.3587775937116	1.03706137008593	0.36510703766918	2.84043106018023	0.00450526096974049	0.0530547672719953
ENSG00000163110	4327.90863628483	0.742258974809481	0.261368304433228	2.83989666007534	0.00451281505245317	0.053071075172561
ENSG00000182022	1334.64613656098	0.996237650729612	0.350787332536932	2.84000463621281	0.00451128781722223	0.053071075172561
ENSG00000172296	645.789260295596	-0.773197207745227	0.272422257686971	-2.83823067289045	0.00453643853742707	0.0533124487953776
ENSG00000010610	42.2918890864037	2.62228160249762	0.924195919703635	2.83736548343399	0.00454875095619435	0.0533842156898526
ENSG00000142208	2938.5929890801	0.476512202731526	0.16793148679438	2.83753935505246	0.00454627418012482	0.0533842156898526
ENSG00000277053	587.079893786513	0.664105051865738	0.234218072605437	2.83541335849214	0.00457664270949015	0.0536749405704008
ENSG00000138031	338.127953558459	-0.901584991635719	0.318184976644282	-2.83352470359924	0.00460377494455083	0.0539563677935948
ENSG00000153292	4823.40312324023	0.573268767999345	0.202340153713669	2.83319330087381	0.00460855083954967	0.0539755733114037
ENSG00000100336	170.828257410325	-3.49835080502212	1.23526931264613	-2.83205513907582	0.00462498724670286	0.0541312282853896
ENSG00000157500	1132.31286483329	-0.466113884241491	0.164694506722594	-2.83017262395156	0.00465228954190378	0.0543817747171378
ENSG00000125534	6505.41791060134	0.698485448158547	0.246802146787958	2.83014332431498	0.00465271562822592	0.0543817747171378
ENSG00000197565	1003.73999683948	-0.81360651418983	0.287863140010643	-2.82636573115873	0.00470794767413941	0.0549899794525245
ENSG00000186918	1654.23767775998	0.618967056406994	0.219046905851867	2.82572837082473	0.00471732479683893	0.055062125596753
ENSG00000166548	621.259896915266	0.650398695781746	0.230225419023841	2.82505163217618	0.0047272997733221	0.0551411475254282
ENSG00000196517	1175.56136965226	0.897857859421743	0.317964234289297	2.8237699797545	0.00474624337824081	0.0552964201252431
ENSG00000144724	482.329164812135	0.970342736185603	0.343640315903945	2.82371622675622	0.00474703937953991	0.0552964201252431
ENSG00000120889	4615.58734732601	0.6519703782477	0.230980397640055	2.82262211386305	0.00476326783292853	0.0554479181769522
ENSG00000112343	1745.13344806974	-0.699116436819566	0.247804376294658	-2.82124330196761	0.00478379059380587	0.0556491664411292
ENSG00000129009	10.3192342542707	3.05592774032128	1.08420080563128	2.8185994000825	0.00482336741212895	0.056071646165999
ENSG00000223573	935.942340512269	-0.979172170443353	0.347516468891675	-2.81762810714036	0.00483798103942828	0.0562035542088883
ENSG00000115112	1754.25752360812	-1.12818390862772	0.400496302249604	-2.81696460689067	0.00484798677637404	0.0562698386212564
ENSG00000185633	2901.60143590292	1.72626322432149	0.612841990168339	2.81681616471369	0.00485022787999554	0.0562698386212564
ENSG00000229835	10.4670420250101	2.24257275455118	0.796265017621537	2.81636478423955	0.00485704834984928	0.0563109951881111
ENSG00000138443	257.503323948364	-0.657609346998327	0.233658100634819	-2.81440851060455	0.00488670853267057	0.0565405651006033
ENSG00000145147	45.2186248259315	-2.20764976615233	0.784378028717494	-2.81452269865586	0.0048849727698313	0.0565405651006033
ENSG00000100105	333.370607602138	0.633890562353371	0.225196422063223	2.81483407483005	0.00488024240084396	0.0565405651006033
ENSG00000100285	170.011870469714	-1.83486765126481	0.652264104351904	-2.81307470244427	0.00490702499793799	0.0567374765386581
ENSG00000160213	21097.5565144472	1.59144235124583	0.565831398439609	2.81257341963444	0.00491468023160233	0.0567878263161303
ENSG00000175772	64.6311051216146	-1.19593563611585	0.425407011977539	-2.81127391520052	0.00493457566133636	0.0569380149662052
ENSG00000203644	249.900845749261	-0.847189777283654	0.301341133096582	-2.81139772913817	0.00493267693362713	0.0569380149662052
ENSG00000189143	12674.4048055958	0.778922179633288	0.27709036554517	2.81107637250675	0.00493760641264622	0.0569380149662052
ENSG00000215808	19.1789652748832	7.13849968238225	2.54166400778635	2.80859297708649	0.00497585118931216	0.0572256147808261
ENSG00000131203	5.75754542884135	5.85862031093859	2.08558261075808	2.80910489026808	0.00496794577721956	0.0572256147808261
ENSG00000148848	19.4018129273398	2.77608744646268	0.988342279983004	2.80883202377057	0.00497215820616478	0.0572256147808261
ENSG00000170537	205.194081541458	1.03986844586527	0.370230557893855	2.8087050722685	0.00497411914511328	0.0572256147808261
ENSG00000196209	33.5659599229449	-1.3809759377066	0.491773067868963	-2.80815690800411	0.00498259432107054	0.0572648866359509
ENSG00000168924	3181.55965167616	-0.668836562407037	0.238224705326621	-2.80758690199667	0.00499142103964563	0.0573280367070114
ENSG00000069493	71.3923990331635	0.998815341208672	0.355797318767089	2.80725932581441	0.00499650005316433	0.0573480876682403
ENSG00000169047	1486.98637291542	0.831578503346385	0.296315246453952	2.80639796061123	0.00500987768331133	0.0574632970275809
ENSG00000105612	710.896626333586	0.557516763879209	0.198791078941152	2.80453613335561	0.00503890393478702	0.0577577229833515
ENSG00000189431	256.734998723968	1.00063806133339	0.357019563342833	2.8027541459192	0.00506682778243935	0.058039129159034
ENSG00000235098	548.943720916961	0.592467939293863	0.211494939039778	2.80133388526347	0.00508918344359788	0.0581017924002001
ENSG00000170340	1657.15662782053	-0.496438536988605	0.177203726586795	-2.80151296223135	0.00508635977274728	0.0581017924002001
ENSG00000048342	109.506875975874	-1.33778795344433	0.477480942223521	-2.80176198701157	0.00508243552449054	0.0581017924002001
ENSG00000225434	9.94433580328586	4.09342022967636	1.46116850918146	2.80147033278828	0.00508703182182326	0.0581017924002001
ENSG00000159184	14.2563018962445	4.10026574498654	1.4635883646831	2.80151567471251	0.00508631701345809	0.0581017924002001
ENSG00000149573	12342.2149579538	-0.567868395626472	0.2027360218425	-2.80102366844129	0.00509407827035831	0.0581191091787232
ENSG00000134198	13.1042955142442	3.34098562486362	1.19393601325524	2.79829537577519	0.00513731089212728	0.058573514843638
ENSG00000257923	3738.05350292875	0.791758948862728	0.283075578352307	2.79698783438439	0.00515814754743873	0.058772138115022
ENSG00000182718	79052.2992298895	0.522410774458481	0.186823488566351	2.79627994567153	0.00516946012458397	0.0588231226477958
ENSG00000134504	1468.49841341969	-0.60681756080259	0.21700541211012	-2.79632454740188	0.00516874669520377	0.0588231226477958
ENSG00000260949	9.74745949982035	-3.00565433265117	1.0754432695201	-2.79480509835948	0.00519310130241584	0.0590530785909217
ENSG00000171109	1443.52251786534	-0.465731550315758	0.166702039225852	-2.79379635953207	0.00520932717105048	0.0591984636578094
ENSG00000115232	77.8754923475408	-1.8270043139066	0.654281480074376	-2.79238274282029	0.005232142698583	0.059418491834403
ENSG00000071994	1220.81647916091	-0.429033926577865	0.153814482088456	-2.78929474489362	0.00528229674198444	0.0599223967056153
ENSG00000184113	6.4196961253131	5.46523840641865	1.9594130579787	2.78922220313083	0.0052834801396349	0.0599223967056153
ENSG00000155893	405.790431884971	-1.32701076632641	0.476063361140855	-2.78746670011805	0.0053121913553718	0.0601686980047214
ENSG00000126777	7969.43083662097	-0.593559362564072	0.212938136154458	-2.78747326938902	0.00531208365292188	0.0601686980047214
ENSG00000072163	7.01043882841854	3.32270329963318	1.19250167350813	2.78633009365797	0.00533085560644398	0.060340375466361
ENSG00000145284	850.13849980254	1.05054323178917	0.377142857350616	2.7855312948762	0.00534400812133687	0.0604147854777321
ENSG00000168234	492.91745625547	-0.819974711027684	0.294372081293505	-2.78550434343033	0.00534445239739077	0.0604147854777321
ENSG00000119969	82.4777212321128	-1.3268554906561	0.476656741003823	-2.78367088203093	0.00537475417692203	0.0607174298187417
ENSG00000113140	1327.38511479206	0.99630821210574	0.358020000637545	2.78282836247015	0.00538873052525979	0.0608353731542616
ENSG00000100433	65.9271761237237	1.97236981680193	0.709118389315843	2.78143938518485	0.00541184358310654	0.0610562418671135
ENSG00000230409	181.423058199252	1.12391327697383	0.404197515497551	2.78060412021667	0.00542578573623556	0.0611734230615549
ENSG00000184588	60.2920195692908	-1.47350045232833	0.530006839604551	-2.78015365505044	0.00543331830466424	0.0611781684762751
ENSG00000169398	3653.83981593344	0.629810516175628	0.226528537111042	2.78027008962187	0.00543137041001908	0.0611781684762751
ENSG00000181856	25.8382597581462	3.09288985385911	1.11261306456231	2.77984319290355	0.00543851527090181	0.0611966352098533
ENSG00000173611	215.802796190657	0.625112659059705	0.224929955852964	2.77914365247259	0.00545024164537525	0.0612885016396609
ENSG00000081803	15.4773824386796	3.35375634674379	1.20723195208269	2.77805465715015	0.00546854186709355	0.0614541233333407
ENSG00000172878	108.295913574632	-0.972821083088311	0.350252765644036	-2.77748294520819	0.00547817149175399	0.0614893162960162
ENSG00000100365	12.7219646229204	-2.83743283562489	1.02159843125626	-2.77744439381696	0.00547882138226055	0.0614893162960162
ENSG00000170442	46.3424270627543	1.2900506290781	0.464649936750411	2.77639256361517	0.00549657976751618	0.0616484060626571
ENSG00000277758	10.719134829533	-2.15050799280127	0.774873844997467	-2.77530078823128	0.00551506749326783	0.0618154633365949
ENSG00000118596	1031.72311851286	-0.976059546663557	0.351732577407049	-2.77500467502615	0.00552009143163239	0.0618314928914292
ENSG00000254988	16.8464097790961	2.36289498293096	0.851893103551103	2.77369892194369	0.00554229449791624	0.0620398027564405
ENSG00000113811	658.653301889622	0.413223397077303	0.149067256638731	2.77206011833143	0.00557027479897991	0.0623124693865081
ENSG00000183273	24.4997870277996	2.68573219557498	0.969045194516576	2.77152418769777	0.0055794526914097	0.062374583207085
ENSG00000196363	1185.53804985029	-0.442275315352242	0.159609544052745	-2.77098288812908	0.00558873637586851	0.0624377982771543
ENSG00000180071	54.0040914098778	1.38067789077227	0.498362902096547	2.77042670103241	0.00559828990803537	0.0625039441062612
ENSG00000183617	382.923765232187	-0.489105842133805	0.176601052653418	-2.76955224663175	0.00561334006118447	0.0626313331729435
ENSG00000102970	17.5589107067516	1.66041104220856	0.599708324763406	2.76869767126146	0.00562808333599495	0.0627551353180771
ENSG00000138613	104.581295376036	-0.743931144003633	0.26879749496595	-2.76762677456452	0.00564660793510701	0.0629209129038317
ENSG00000019102	348.934021989881	1.31220297089491	0.474209214129666	2.76713933807305	0.00565505791643032	0.0629742857295687
ENSG00000106070	305.91791009114	1.67482351286221	0.60553539769841	2.76585566959104	0.00567736562164598	0.06314096672296
ENSG00000168481	95.7442223241455	1.60161368890137	0.579053409703977	2.76591703297309	0.0056762974395072	0.06314096672296
ENSG00000158125	3467.29424161345	0.998386765643223	0.361061096033796	2.76514633287927	0.00568972655814177	0.0632375616491144
ENSG00000188157	11535.706839866	0.672091182745233	0.243147919737624	2.76412474953713	0.00570757137505958	0.0633949422258877
ENSG00000139865	17.0088442966642	2.09854881623167	0.759354085524024	2.76359718902873	0.00571680644846492	0.0634565515779607
ENSG00000226752	282.8221137178	-0.919625828753618	0.33291027747534	-2.76238341371645	0.00573810506727151	0.0636519005044528
ENSG00000167207	609.718957221903	-1.09206890285694	0.395545700144764	-2.76091713917574	0.00576392981517346	0.0638971729832857
ENSG00000151612	518.72333732853	0.74881035246555	0.271429459694651	2.7587659545428	0.0058020072255475	0.064195198916749
ENSG00000128536	12.2401381635439	2.2455495700155	0.813882468386639	2.75905877966245	0.00579681072454034	0.064195198916749
ENSG00000178234	1048.26464298628	0.615485926699953	0.22308575107807	2.75896566107694	0.00579846276014545	0.064195198916749
ENSG00000185187	308.67866132126	0.866056819809361	0.314071825222312	2.75751197738394	0.00582430795321761	0.0644005259223065
ENSG00000140391	3407.6153027448	0.698299312804261	0.253383722543408	2.75589649482963	0.0058531515848679	0.0646778889002262
ENSG00000149328	64.5962202892393	1.28151627910314	0.465085743610623	2.75544089817563	0.00586130927950687	0.0647264609460307
ENSG00000058668	5071.57192391784	-0.653044566556062	0.237042488903063	-2.75496840072043	0.0058697804165192	0.0647784298051397
ENSG00000163898	1591.26245805692	0.910594925053578	0.330947794532286	2.7514760336762	0.00593273607998999	0.0654312334975819
ENSG00000164163	1947.99668870243	-0.564588611143699	0.205228901484725	-2.75101901856508	0.00594101939859483	0.0654806141914312
ENSG00000143179	960.191277694581	-0.533412832900609	0.193972597625682	-2.74993911217275	0.00596063393734914	0.065654741928356
ENSG00000257925	20.9295527239382	2.18502555191104	0.795086679188654	2.74816018064942	0.00599307226669276	0.0659698070047658
ENSG00000179409	727.225617572671	-0.499069032212284	0.181634433170509	-2.74765650708852	0.00600228546399055	0.0660289778823257
ENSG00000213606	10.4601568352692	-2.2286595540676	0.811937237817469	-2.74486678312521	0.00605354656445949	0.0665503314003358
ENSG00000100350	81.4421731241337	-1.00857526229805	0.367569365778662	-2.7439045693089	0.00607131847617882	0.066703087089819
ENSG00000198833	1805.99070020264	0.535344391541205	0.195152375548347	2.74321227213849	0.00608413413378933	0.066801230230916
ENSG00000164418	6.11102604567082	3.90972592070081	1.42544176651551	2.74281700771132	0.00609146210727544	0.0668390341554043
ENSG00000134107	12187.3849030068	0.500848440385894	0.182632702859375	2.74238092381265	0.0060995560729736	0.0668720290938583
ENSG00000237840	11.6986675510826	-2.48308539086754	0.905496510318858	-2.74223628978222	0.00610224270138666	0.0668720290938583
ENSG00000254783	5.57689532701695	-3.7828289417468	1.38015675202988	-2.74086906156359	0.00612769215794482	0.0671081754153027
ENSG00000221990	29.5011623032395	-1.23846429598538	0.451909609962016	-2.74051329886407	0.00613432994440353	0.0671381340289203
ENSG00000148344	4342.01470722305	-1.05530353478943	0.385204621094179	-2.73959209469457	0.00615154778656273	0.0672837760125949
ENSG00000104412	1004.10337187722	0.555197233110921	0.202726570448576	2.73865054729841	0.00616919081595227	0.0674338805517527
ENSG00000065183	892.682661992762	-0.444671552795398	0.162442914984972	-2.7374019533972	0.0061926576595393	0.0676474127189674
ENSG00000178726	3365.14250015429	-0.962603023979698	0.351692066734	-2.73706209218463	0.00619905912179198	0.0676743732172786
ENSG00000065802	659.928982813063	0.667904062462804	0.244338369864876	2.73352098907826	0.00626611294962795	0.0683630141397266
ENSG00000177374	71.8442899189434	-1.41198531088668	0.5166156908511	-2.73314445513744	0.00627328120994911	0.0683978474126581
ENSG00000225492	25.5146871608901	1.98923930973053	0.72803797247992	2.73232906101666	0.00628882957220929	0.0685239473020018
ENSG00000170779	561.182667404479	-0.71855550442163	0.263044905261295	-2.73168379257471	0.00630115846630193	0.0686148300080536
ENSG00000274173	382.482630466688	0.966341361421584	0.353798782688863	2.7313303739414	0.00630792031610672	0.0686450152046908
ENSG00000119922	397.388488935706	-1.19842988377569	0.4388099429901	-2.73109099490648	0.00631250399064443	0.0686514735518568
ENSG00000149922	133.510199976733	1.15527629566406	0.423076459790017	2.73065605266115	0.0063208400186927	0.0686987065834541
ENSG00000228951	21.4616417689993	-2.00274260602547	0.733634516472925	-2.72989146646752	0.00633551796575627	0.0688147642682049
ENSG00000134627	9.79307843849317	2.84169933799847	1.04123555095773	2.72916088524317	0.00634957176311005	0.0689239004317403
ENSG00000166197	3577.01426833775	-0.479638681035356	0.175836617137555	-2.72775198274054	0.0063767533077637	0.0691753093695299
ENSG00000128590	601.579362037421	0.802348120787074	0.294190793423568	2.72730533627501	0.00638539216045384	0.0692253762574721
ENSG00000232053	13.4251650597341	2.54535536344983	0.933465145220728	2.72678136562662	0.00639554000852403	0.0692917291225793
ENSG00000184371	172.254173857566	-1.0119463363181	0.371162829768856	-2.72642154643638	0.00640251710315412	0.0693236669350326
ENSG00000143797	4614.92193219798	0.547017127624926	0.20071327288518	2.72536598981101	0.00642302446717364	0.0695019723004544
ENSG00000166446	212.106607296035	-1.2623459762116	0.46362112726804	-2.72279648610962	0.00647319205538871	0.0700007978082733
ENSG00000117054	1318.90400828641	-0.974900401982969	0.358366097645933	-2.72040354371404	0.00652022911865189	0.0704651645643252
ENSG00000160818	750.114580936293	-0.598181279341971	0.220047383918577	-2.71842031788622	0.00655944528523724	0.0707342202014593
ENSG00000078124	871.157094348609	1.06133134677228	0.390406977954962	2.71852555590006	0.00655735899876236	0.0707342202014593
ENSG00000203805	7.66035404596819	3.75706966123084	1.38204123303164	2.71849317620528	0.00655800084505925	0.0707342202014593
ENSG00000159231	65.8482009706614	1.49350520435627	0.549423526808801	2.71831316185338	0.00656157020874914	0.0707342202014593
ENSG00000037042	518.937372056145	-1.10662596779049	0.40715093872085	-2.7179747424068	0.00656828519308941	0.0707622709750177
ENSG00000132274	4676.87815739387	-0.932284626503685	0.343294551303628	-2.71569887422747	0.00661360416627323	0.071205919700082
ENSG00000122779	603.233953793636	0.849845261007727	0.313367562066632	2.71197585162634	0.00668834651520805	0.0719277772366053
ENSG00000276855	47.1192621507792	2.01310398315911	0.742310609737286	2.71194289392088	0.0066890115419104	0.0719277772366053
ENSG00000165914	310.783365192424	-0.841400760678576	0.310321848960015	-2.71138098557472	0.00670035898278221	0.0720047946900487
ENSG00000178363	404.874550676891	0.945189705624235	0.348725214795639	2.71041400369669	0.00671992718741445	0.0721700045315016
ENSG00000251076	105.711817556183	-3.46617043418692	1.27907260670334	-2.70990905130911	0.00673016599437419	0.0721898416042444
ENSG00000180316	8.23660012923778	-4.43274313311154	1.6356861657057	-2.71002055654062	0.00672790382208731	0.0721898416042444
ENSG00000114698	7.54456144592689	-2.51833753831529	0.929380835326415	-2.70969385486715	0.00673453374434875	0.0721916841567104
ENSG00000124343	484.509693660943	-0.928850587430547	0.343031427803401	-2.70777110242765	0.00677367225086644	0.0725660218406955
ENSG00000177679	537.838739152636	-1.06094731675944	0.391936969222071	-2.70693351246055	0.00679078560762159	0.0726588721263243
ENSG00000277586	418.321965276654	1.58369929763588	0.585023315626792	2.70707039417584	0.00678798623304847	0.0726588721263243
ENSG00000207563	13.6098298688493	3.14867316798176	1.16353828783737	2.70611908597705	0.00680746294379415	0.0727796152669524
ENSG00000167721	1635.6306895881	-0.468932770612799	0.173295661999265	-2.70596946976543	0.00681053069339107	0.0727796152669524
ENSG00000204262	2148.03193310643	1.00919605455799	0.373114733431732	2.70478746651435	0.00683481034544991	0.0728121814624584
ENSG00000254245	6.62739107536295	3.52858701589261	1.30486666947856	2.70417437921276	0.00684743444383944	0.0728121814624584
ENSG00000124787	156.645614478507	-0.749455932698346	0.277074112210112	-2.70489338293003	0.00683263153722719	0.0728121814624584
ENSG00000175556	15.4371290643105	3.61834211469468	1.33762629833372	2.70504708168645	0.00682947090767144	0.0728121814624584
ENSG00000219507	88.9316467717985	1.00060478589097	0.369966351407275	2.70458321975736	0.00683901367142854	0.0728121814624584
ENSG00000134817	5.66357708468808	4.9511352366966	1.83068293878488	2.70452907589936	0.00684012832227216	0.0728121814624584
ENSG00000139722	3256.50976479761	0.531562856290869	0.196567345594786	2.7042276766898	0.00684633616304475	0.0728121814624584
ENSG00000100949	189.203239734763	3.06657902515976	1.13401602289638	2.70417609914138	0.00684739899945416	0.0728121814624584
ENSG00000162924	898.665500199437	-0.837273466128506	0.309943753820562	-2.70137228386682	0.00690539957386869	0.0733379010298832
ENSG00000138641	1631.22772160663	-0.83889548171778	0.310528385885594	-2.70150981310562	0.00690254434123296	0.0733379010298832
ENSG00000198483	623.213333708703	0.948450931008923	0.351179805609611	2.70075589728889	0.00691820936056711	0.0734286194007139
ENSG00000118508	211.323280639315	1.30891127884129	0.48477833554738	2.70002015944742	0.00693352745694101	0.07354583224209
ENSG00000118985	4717.29427653522	-0.466702768021838	0.172908226369993	-2.69913570811359	0.00695198209700762	0.0736507709230395
ENSG00000133026	1919.9080622045	0.524529020995847	0.194329502266951	2.69917338786419	0.00695119498613363	0.0736507709230395
ENSG00000196422	1122.19751142988	0.459293844410843	0.170190514114047	2.69870413637192	0.00696100312305979	0.0736644591960323
ENSG00000156642	3821.89815315564	0.578004203450729	0.214181590947738	2.69866425444457	0.00696183729455091	0.0736644591960323
ENSG00000262576	18.9737583115733	2.63000649016595	0.974865984741103	2.69781337263953	0.00697965576738451	0.0738076075463126
ENSG00000227533	28.9964950407991	-1.48582410571768	0.550939054906165	-2.69689377161825	0.00699895934843607	0.0739662749323357
ENSG00000186591	9246.75222422726	0.554048072674309	0.205466403752076	2.69653852190281	0.00700642931600914	0.073999764507021
ENSG00000168993	138.791986899599	-2.94213838885979	1.09151173970408	-2.69547113589217	0.00702891673246235	0.0741008041556463
ENSG00000112319	5.62333382204475	4.67861687607664	1.73572340587042	2.69548527158937	0.00702861850220389	0.0741008041556463
ENSG00000103313	11.8521637223054	-3.47034831170545	1.28743825988502	-2.69554542523491	0.0070273495275698	0.0741008041556463
ENSG00000152465	206.148649610374	-0.819832528884504	0.304201347949181	-2.69503253161608	0.00703817590845686	0.0741529801010412
ENSG00000017483	1559.39011605899	0.82151580634613	0.305137602166086	2.69227981249908	0.00709653781009925	0.0747221132330217
ENSG00000068438	1038.3188833555	0.681818772173962	0.253344933861779	2.69126665286289	0.00711812751175461	0.0748578140829695
ENSG00000137709	85.1136992320207	-1.44749831232025	0.537834859909027	-2.69134342196617	0.00711648955512936	0.0748578140829695
ENSG00000070961	1378.61166583876	-0.607813989440265	0.225939922386194	-2.69015755613717	0.00714182915438259	0.0750611915706491
ENSG00000168490	31.6010320559247	-1.68367754658634	0.625935815581583	-2.68985653907975	0.00714827416732888	0.0750688545521873
ENSG00000285188	11.1275438373256	3.47227983066523	1.29094663148647	2.68971601611993	0.00715128466207701	0.0750688545521873
ENSG00000154217	1054.30808707527	-0.688904577675174	0.256336621628271	-2.68749963738773	0.00719891804515012	0.0755227957114682
ENSG00000111224	145.799430156115	0.702248811941812	0.261609671665703	2.68433811131867	0.0072673569371004	0.0761943181613726
ENSG00000230479	17.329437687207	2.75251700242553	1.02600797012481	2.68274426960905	0.00730208038510815	0.0765117497111972
ENSG00000271425	180.876112744776	-0.713229414743096	0.265958054542325	-2.68173647145396	0.00732411303397033	0.0766959006387459
ENSG00000217801	130.870023669716	1.69704281020253	0.633173495260758	2.6802177016327	0.00735742931278432	0.0768576632218908
ENSG00000107984	145.899864998435	-1.42179355856139	0.530467587591184	-2.68026471705397	0.00735639592983437	0.0768576632218908
ENSG00000237438	12.9074703499003	4.42754377293916	1.65161434854862	2.68073704786467	0.00734602148220012	0.0768576632218908
ENSG00000100320	297.424840393889	1.00388025177732	0.374509230384919	2.68052205481167	0.00735074204004217	0.0768576632218908
ENSG00000137745	78.4441141344106	3.84861850049779	1.43681043294404	2.67858474037659	0.00739340215422919	0.0771865801356269
ENSG00000127990	16.014747350543	-2.39435939022094	0.893996330974348	-2.67826534322728	0.00740045663956207	0.0771947424574343
ENSG00000165475	600.852392243771	0.762612770088936	0.284754299040271	2.67814313132138	0.00740315751553424	0.0771947424574343
ENSG00000123131	761.390622789807	0.527741627696382	0.197110888442794	2.67738445027376	0.00741994411299185	0.0772761128716857
ENSG00000188613	181.807825864292	-0.783391586157468	0.292590247975527	-2.6774357367611	0.00741880827175259	0.0772761128716857
ENSG00000197081	5547.6687299379	0.580937907304669	0.217021692240289	2.67686562254546	0.00743144335802885	0.0773490520114255
ENSG00000134250	5930.01581277433	-0.645161003029203	0.241064706149702	-2.67629805015321	0.00744404127992411	0.0774333314516894
ENSG00000008283	1658.98889880263	0.507433480145558	0.189624815402122	2.67598667964151	0.00745096063973628	0.0774584760161104
ENSG00000064989	149.396568371839	-1.22711223284673	0.458609412082407	-2.67572404865129	0.0074568013807113	0.0774723839101074
ENSG00000169894	91.1412844453058	-4.01109407638865	1.49931248593912	-2.67528891675722	0.00746648746664924	0.0775262020903441
ENSG00000117308	1770.48734514115	0.496033299727142	0.185427066522564	2.67508573063028	0.00747101427661667	0.0775264177498129
ENSG00000184347	31.2332016739522	2.65231046804542	0.991709759339882	2.67448257221034	0.00748446662234132	0.0776055382672891
ENSG00000170835	286.764231412856	-1.48249867697248	0.554341983303557	-2.67433952618499	0.00748766018736995	0.0776055382672891
ENSG00000049883	253.342131003955	-0.675911297833561	0.252878902599826	-2.67286551343183	0.00752063940887444	0.0778854130350169
ENSG00000103365	1562.65644676694	0.776295698938275	0.290450666428964	2.67272824153817	0.00752371731846545	0.0778854130350169
ENSG00000112541	6.29367521046285	4.97486106949645	1.86149369830995	2.67251029321943	0.0075286064747517	0.0778891607926055
ENSG00000164300	2788.51427429011	-0.630077578580967	0.235783872407752	-2.67226749712272	0.00753405638664302	0.0778987020025199
ENSG00000102316	2336.03407877979	0.479607121025004	0.179536667684739	2.67136026979837	0.00755445174199102	0.0780626680005738
ENSG00000142149	11.8245574714616	-3.69683153433652	1.38440300399836	-2.67034347921778	0.00757736900568954	0.0782524812382284
ENSG00000079263	13.5170049878023	2.5826884019159	0.967789920497702	2.66864569181265	0.00761577409050945	0.0786019155532184
ENSG00000169255	92.2864970425732	1.15674725537289	0.433604820045483	2.66774537988658	0.00763621046615919	0.078765588171624
ENSG00000004864	872.170162268447	-0.531844388368007	0.199383020558246	-2.66745075322319	0.00764290892820183	0.0787856131016554
ENSG00000266010	5.55144538728366	4.67394870056313	1.75234264870526	2.66725728784638	0.00764731030977997	0.0787856131016554
ENSG00000277147	63.2615372227613	1.19974113076724	0.450003303470689	2.6660718299491	0.00767432939457282	0.0790166590267058
ENSG00000058085	59265.531485321	1.43034080849533	0.536660020347468	2.665264327999	0.00769278302513732	0.079111973668552
ENSG00000094755	827.196708043365	2.29062144455943	0.859371759325489	2.66546045957726	0.00768829722867351	0.079111973668552
ENSG00000070214	2282.84720475402	-0.576232808708353	0.216235498421303	-2.6648390893971	0.00770251686846524	0.0791647567036705
ENSG00000157617	942.486007924391	-0.618631843872256	0.232322730025495	-2.66281238949098	0.00774906049104358	0.0795955735811372
ENSG00000151135	689.355397415991	0.724433511484163	0.272089986709076	2.66247766132879	0.00775677180161457	0.0796272427486746
ENSG00000203688	83.6780261245207	5.96089694618337	2.24022924998755	2.66084238754426	0.00779454341319479	0.0799672745521862
ENSG00000196428	2620.43590994011	-0.549325517011841	0.206539507832356	-2.65966314521151	0.00782188377403046	0.0801999465626901
ENSG00000182103	11.3208198381274	2.2309772562724	0.83900546864198	2.65907355751027	0.00783558536838571	0.0802925826462633
ENSG00000197641	7896.696268515	-0.565271453646064	0.212631785422448	-2.65845227477636	0.00785004679526094	0.0803928899478955
ENSG00000099282	377.361994232544	0.945596906844158	0.355828077018107	2.65745445038628	0.0078733229203073	0.0805832961593618
ENSG00000101577	172.862947166025	1.25227837935364	0.471439803682508	2.65628478879351	0.0079006861643352	0.080815282673833
ENSG00000205730	1027.5780958606	0.687001715239934	0.258821885708394	2.65434166573517	0.00794633222063522	0.0812338953392923
ENSG00000137936	1531.83085582553	0.873563277938505	0.329162578795413	2.65389608118685	0.00795683271367266	0.0812675273163384
ENSG00000086062	11361.437296166	0.568105965417774	0.214072536689424	2.65380124981646	0.00795906908038536	0.0812675273163384
ENSG00000077063	39.2015162245727	1.85003270360147	0.697205767085179	2.65349598488828	0.00796627183252925	0.0812928273301695
ENSG00000224078	708.371073816208	0.838709071046305	0.316178126690842	2.65264735364313	0.00798632603916796	0.0814009120283677
ENSG00000041353	2765.49083646147	0.605033548348	0.22808395418471	2.65267914400513	0.00798557397929978	0.0814009120283677
ENSG00000116014	5.33187838013829	4.49544953126081	1.69518627923627	2.65189117345035	0.00800423358835034	0.0815351325562864
ENSG00000112293	26.4534301583301	-2.31919467229703	0.874988732943135	-2.65054232698075	0.00803626570405516	0.0818129890167272
ENSG00000120708	18928.177693172	1.27662630518544	0.481850800933049	2.64942239945103	0.00806294865862721	0.082036092058948
ENSG00000105281	3755.94640174353	-0.842870390237198	0.318192006407793	-2.64893640714839	0.00807455237863151	0.0821055990983186
ENSG00000104327	28.3829812499898	-3.27331990941038	1.23597512228433	-2.64837038415518	0.00808808578296088	0.082194634315323
ENSG00000163874	1603.36366685632	1.01202053634736	0.382318521378423	2.64706123234257	0.0081194649534051	0.0824648137682023
ENSG00000105996	6.53459407900632	-3.61334106476185	1.36526788321857	-2.6466169087956	0.00813013972508375	0.082524515616558
ENSG00000158092	1789.98538109557	0.5438668857821	0.205518468055354	2.64631636722601	0.00813736728811595	0.0825491770000206
ENSG00000114473	184.891669563376	0.779247976521658	0.294648010657264	2.64467414792114	0.00817696180250766	0.0827810125458098
ENSG00000151725	461.782638314073	-1.31799050594165	0.498275581533752	-2.64510354267153	0.00816659232276674	0.0827810125458098
ENSG00000073417	646.813771936138	-0.618708565606263	0.233933986384543	-2.64479982224227	0.00817392566667581	0.0827810125458098
ENSG00000179859	109.255673981283	-0.99480045555721	0.37616711473085	-2.6445705023125	0.00817946651135581	0.0827810125458098
ENSG00000232931	42.1216793225683	1.32563886808324	0.501696834812473	2.6423106069201	0.00823425032305097	0.0832864649077554
ENSG00000103047	311.422615523603	-0.550180091051703	0.208245225318332	-2.64198177994562	0.00824224896778873	0.0833183863048208
ENSG00000048162	454.958584499394	-0.628613311028989	0.237997643138155	-2.64125855508614	0.00825986572222282	0.0834169519819022
ENSG00000108175	2605.38947853561	0.824106978203274	0.31202874608243	2.64112518013185	0.00826311822822855	0.0834169519819022
ENSG00000120805	1866.19815223721	0.41255253338003	0.15621163215965	2.64098471846448	0.00826654479099932	0.0834169519819022
ENSG00000166275	433.067150863741	-0.714837804389677	0.270745730360229	-2.64025513325207	0.00828436348540856	0.0835401469429586
ENSG00000188906	419.031038164099	0.866709799686096	0.32828829592911	2.64008741838683	0.00828846444822031	0.0835401469429586
ENSG00000198042	370.728608870072	-0.654415456221168	0.247941921742515	-2.63939011048229	0.00830553449822408	0.0835452328076239
ENSG00000255364	13.5176425923558	2.5436021384241	0.963823208310652	2.63907542015139	0.00831324839097077	0.0835452328076239
ENSG00000102802	6.94942050615147	2.76237254086838	1.04655390743579	2.63949379123394	0.00830299441149339	0.0835452328076239
ENSG00000154262	32.01903613252	2.02112937079832	0.765819462526375	2.63917211522777	0.00831087745689161	0.0835452328076239
ENSG00000125871	423.816560368272	-0.556705470932811	0.210886639559914	-2.63983281299642	0.00829469352925376	0.0835452328076239
ENSG00000084110	36.8593473183774	-2.54901403880027	0.965965842438904	-2.63882419730746	0.00831941112790411	0.0835583587014538
ENSG00000205683	9.42687137441258	2.96798670573863	1.12482699220954	2.6386161839062	0.00832451698863419	0.0835608604372527
ENSG00000115526	17.3916132766745	1.88207971335275	0.713621755918416	2.63736313774592	0.00835533339141109	0.0838212892123777
ENSG00000160172	61.411994605792	-1.09719838686104	0.416126376096698	-2.63669512409393	0.00837180364679127	0.0839287073920246
ENSG00000101400	242.358286024564	0.598072361378689	0.226840432858282	2.63653332804357	0.00837579718640548	0.0839287073920246
ENSG00000140332	2393.7792874822	0.515793950062625	0.195699954569088	2.63563653450177	0.00839796325403957	0.0841018380592263
ENSG00000242110	68.4151613464744	1.51164038838656	0.573685763496781	2.63496235146689	0.00841466158583589	0.0841874266761168
ENSG00000102181	364.593614802148	0.790193786735354	0.299895578185596	2.63489642466928	0.00841629606991694	0.0841874266761168
ENSG00000087269	1329.50517928225	-0.456922518708604	0.1734626659952	-2.63412600104537	0.0084354177859337	0.0843296705444447
ENSG00000225886	73.7914081419133	-3.78289742715371	1.43655066741631	-2.63331987722883	0.00845546715925094	0.0844319863464378
ENSG00000102172	1946.01424520002	0.641182468549313	0.243470731372977	2.63350943636455	0.00845074874246501	0.0844319863464378
ENSG00000171204	491.163752047028	-0.477605011247462	0.181432208066834	-2.63241580057013	0.0084780034397469	0.084607917158263
ENSG00000091436	1317.57245302406	-1.05602462236301	0.401414294679894	-2.63075988164581	0.00851942052225111	0.0849249305347925
ENSG00000137203	2250.52425089562	-0.581778688692014	0.221145472579458	-2.63075107035249	0.00851964138930844	0.0849249305347925
ENSG00000154451	17.25478638265	2.02976857645723	0.772476941025026	2.62761057147397	0.00859868914145268	0.0855806493965587
ENSG00000143416	153.44534658472	1.33103671432327	0.506638702132601	2.6271911496704	0.00860929565347476	0.0855806493965587
ENSG00000163739	1530.62635777121	2.26925344077117	0.863769472006842	2.62715170460804	0.00861029375794497	0.0855806493965587
ENSG00000174226	66.1054068379333	2.08100523965922	0.791902768578252	2.62785448192758	0.00859252640621804	0.0855806493965587
ENSG00000104885	1110.60887485422	-0.691370367476041	0.263138855219832	-2.62739748904986	0.0086040761972559	0.0855806493965587
ENSG00000186197	80.1698277627601	1.2776993236243	0.486467546217035	2.62648419932676	0.00862719977813539	0.0856528637995445
ENSG00000160360	480.99879774747	1.02139657312771	0.388885425102293	2.62647172456782	0.00862751601073005	0.0856528637995445
ENSG00000135116	88.4486916458648	-1.90456169867079	0.725543943049355	-2.62501219521756	0.008664586382667	0.0859712853020679
ENSG00000124613	150.708462048569	0.757149559680784	0.288531339363901	2.62415015765706	0.00868654796122069	0.0861395145088196
ENSG00000229474	13.2501703897178	-3.27312986351252	1.24826965838897	-2.6221336403681	0.00873811589910871	0.0866009700715238
ENSG00000119471	1545.32861690399	-0.680421275180951	0.259516087871488	-2.62188475774918	0.00874449944622945	0.0866130352946407
ENSG00000104731	666.515103576248	-0.722553400221323	0.275605570982721	-2.62169374024237	0.0087494016473168	0.0866130352946407
ENSG00000186767	282.782975899712	-0.968418249652056	0.369555359524708	-2.6204957516989	0.00878020240778772	0.0868486428421983
ENSG00000099330	227.054699411362	0.681834189350772	0.260204757834172	2.62037556509749	0.00878329779397996	0.0868486428421983
ENSG00000283283	17.0086027174568	-2.69485565561507	1.02892859392853	-2.61908909084341	0.00881649185369604	0.0871267905472949
ENSG00000104738	1183.40176304951	-0.572750112609769	0.218785406223879	-2.61786250963962	0.00884824485739307	0.0872901678735366
ENSG00000213859	1538.72855693759	0.803120052755339	0.306780881452888	2.61789472978835	0.00884740945652899	0.0872901678735366
ENSG00000065268	959.864669434716	-0.641508183941488	0.245030894546634	-2.61807061157914	0.00884285045266376	0.0872901678735366
ENSG00000184254	16115.0088877866	1.070399773191	0.408932869724402	2.61754398445003	0.0088565073398948	0.0873216096177021
ENSG00000165046	53.5555769960117	1.18132784453104	0.451702881118834	2.61527631084614	0.00891552983300227	0.0878532020485705
ENSG00000281406	251.804944945537	0.831097364397401	0.317933324928668	2.61406181495403	0.00894728470676465	0.087953662047033
ENSG00000119888	357.651047373068	0.936669380896634	0.358357747233277	2.61378298119197	0.00895458948936226	0.087953662047033
ENSG00000172765	1443.07334927872	-0.550265899441394	0.210467753713077	-2.61449029475342	0.00893606992575946	0.087953662047033
ENSG00000058091	770.301665886098	0.791152370019936	0.30271383102579	2.61353228340774	0.00896116172280265	0.087953662047033
ENSG00000177627	51.5891724253828	1.56030516460773	0.597013126605925	2.61351902508108	0.00896150941984591	0.087953662047033
ENSG00000090376	136.595915419843	2.15925038500311	0.826139770118901	2.61366231611431	0.00895775227877375	0.087953662047033
ENSG00000180638	30.7021172242774	-1.72380407699526	0.65946957318775	-2.6139251105441	0.00895086537250223	0.087953662047033
ENSG00000124145	10569.5295625894	0.527696422989093	0.201936071836058	2.61318554031051	0.0089702589569492	0.0879893417071329
ENSG00000272405	62.3297420418061	1.2992804212488	0.497788169528555	2.61010707120526	0.00905138876506474	0.0887345548164894
ENSG00000185275	89.2013450466311	0.975040371735896	0.373629456651703	2.60964534347416	0.00906361344899813	0.0888037980580938
ENSG00000137834	43.1905412158704	2.8356769313269	1.08715474802009	2.60834709731176	0.00909806479069402	0.0890906116812127
ENSG00000109743	7.61412311202463	-3.56184522705234	1.36572218720316	-2.60803057929856	0.00910648188199311	0.0891223098860588
ENSG00000115363	99.332456752677	1.29606361739709	0.497001947868935	2.607763657576	0.00911358547288675	0.0891411245372465
ENSG00000170145	1198.6720219776	0.555438526678587	0.213011727067584	2.60754905058517	0.00911930039822944	0.0891463428133736
ENSG00000179088	7.18011736308489	2.65476066128085	1.01845336546091	2.60665902957609	0.00914303557427125	0.0893276133193282
ENSG00000236740	122.579602706969	1.00478686026432	0.386089843115937	2.60246903196207	0.0092555173737857	0.0902812892508576
ENSG00000255346	23.6202475094112	-2.40965286637118	0.925921798964957	-2.60243669504791	0.00925639024925968	0.0902812892508576
ENSG00000159128	415.982618190128	0.869148866715652	0.333939698468899	2.60271201866885	0.00924896074427035	0.0902812892508576
ENSG00000077782	207.081156861977	1.21609112661097	0.467365953928604	2.60201051529042	0.00926790105321349	0.0903423442609281
ENSG00000167757	2270.62726473745	-1.02144026643563	0.392597559901693	-2.60174889189683	0.00927497363585093	0.0903600913957051
ENSG00000137198	8.28869361218385	-3.65451725040195	1.40479453145864	-2.60146033356733	0.00928277994782867	0.0903849626499107
ENSG00000213906	5.92095515559982	-2.87619330192314	1.10572033914873	-2.60119417188027	0.00928998556508778	0.0904039602077688
ENSG00000135643	23.1692655701959	-1.60773638281083	0.618409813613837	-2.59979118606738	0.00932805021400005	0.0907230661005489
ENSG00000144355	8.51317519246376	-4.55262073807725	1.75192602067695	-2.59863754767345	0.00935945396523594	0.0909770652383528
ENSG00000169583	1337.72178811481	1.30409116486767	0.502718819337103	2.59407667806684	0.00948453315840631	0.0921408204349975
ENSG00000189129	77.6648491647681	1.09414901946141	0.42183330809152	2.59379474895337	0.00949231359996414	0.0921643653992004
ENSG00000186300	172.205124999292	0.91690727175652	0.353617819286655	2.59293288332069	0.00951613395010069	0.0923435333398095
ENSG00000167632	655.283490619098	0.497427051715278	0.191968878056617	2.59118590862719	0.00956458065098344	0.092761336020389
ENSG00000148362	184.900330047509	-1.12071924699547	0.432693540339817	-2.59009932553029	0.00959482434261603	0.0930022269378641
ENSG00000170271	162.275425602247	0.762097944946281	0.294563032718537	2.58721516380668	0.00967551534150801	0.0936788077943981
ENSG00000171004	683.413877817108	0.865832358173441	0.334640634055292	2.58734974196344	0.00967173679834945	0.0936788077943981
ENSG00000148843	1764.63738078522	-0.462892294286135	0.178937672760847	-2.58689121828917	0.00968461613777371	0.0937141848427428
ENSG00000150782	1066.03761435969	-0.58567104481234	0.226432534669158	-2.58651454689613	0.00969520778772696	0.0937639404091301
ENSG00000250565	100.485319968257	-0.921892330687664	0.356515183459057	-2.58584310980275	0.00971411358518698	0.0938940023781696
ENSG00000128595	3565.16133805116	0.59410924033675	0.229776211312182	2.58559942712944	0.00972098313298911	0.0939076444711273
ENSG00000164733	12185.3492707605	0.609039374814439	0.235762655366105	2.58327330878035	0.00978677593697899	0.0944901683477686
ENSG00000170142	2624.47828454839	-0.480227427758556	0.185935039502977	-2.58276992352948	0.00980106599647935	0.0945750647613165
ENSG00000196407	37.9836336571701	-1.76392883803555	0.683071820301358	-2.58234754473891	0.00981307079445639	0.0946378268041605
ENSG00000120885	263.326052833492	1.50031521544929	0.581062026179774	2.58202248271703	0.00982231858765958	0.094673944706265
ENSG00000132122	130.490420885663	1.25102621209067	0.484964589061518	2.57962383297223	0.00989079896006814	0.0949448363758365
ENSG00000184313	7.63450614224628	2.54919094147552	0.987921206032472	2.58035856089492	0.00986977775393786	0.0949448363758365
ENSG00000090530	2872.76712937319	-1.11767685156291	0.433214641980604	-2.57996093219062	0.00988114931041664	0.0949448363758365
ENSG00000152785	152.879367634588	3.13381870337501	1.21436789672456	2.5806172180833	0.00986238682538332	0.0949448363758365
ENSG00000086730	10.9508751834273	-2.13577843828186	0.827699559079676	-2.58037885226935	0.00986919776531581	0.0949448363758365
ENSG00000197353	516.677593699413	2.36335761114321	0.915978965631774	2.58014397690142	0.00987591306998768	0.0949448363758365
ENSG00000137760	241.753912956285	-0.566443860524262	0.219606606368433	-2.57935710537752	0.00989844013223886	0.0949448363758365
ENSG00000169180	2377.0661828165	-0.39354207943539	0.152577112470775	-2.57929956244761	0.00990008930300789	0.0949448363758365
ENSG00000079435	226.482651529297	-0.864809760246513	0.335244410996166	-2.57963960585282	0.00989034726556657	0.0949448363758365
ENSG00000148180	15591.8480725858	0.526584352373316	0.204195386936601	2.57882589941569	0.00991367370987297	0.0950221482887824
ENSG00000135750	1102.94373966347	-0.613493327542808	0.238152903470451	-2.5760480708098	0.00999367514551745	0.0957356240972315
ENSG00000136688	1020.03203869938	3.15246124395862	1.22392370495055	2.57570078200747	0.0100037173922012	0.0957784962341803
ENSG00000171388	6.35137184819249	3.96447007717725	1.5393888112398	2.57535331440036	0.0100137738030988	0.0958214562193078
ENSG00000171206	2370.2411655338	0.632590224983811	0.245824248373851	2.57334347269828	0.0100721195234489	0.0963261903284811
ENSG00000272440	10.7701853467886	-3.01780186014814	1.17361799459853	-2.57136638500543	0.010129809578407	0.0968240965536069
ENSG00000139211	766.30550967612	0.996718385189587	0.38767981922576	2.5709834140455	0.0101410183613613	0.0968774130523162
ENSG00000115221	12922.9385936812	0.804774245657579	0.313194489106323	2.56956706982279	0.0101825678845717	0.0972203554129061
ENSG00000085185	294.573989169296	0.793964089240213	0.309159181103137	2.56814009665572	0.0102245824170534	0.0975673546785377
ENSG00000115825	708.20455532779	0.536097578639652	0.208815942757458	2.56732111332292	0.0102487654750872	0.0977200008266792
ENSG00000074527	4914.41065440583	0.863490060543795	0.336353001013647	2.56721378415399	0.010251938476731	0.0977200008266792
ENSG00000266680	64.429296714356	-0.981334056264617	0.382294209329546	-2.56696029475739	0.0102594359249291	0.097737317324698
ENSG00000163704	83.3531393728255	1.06801961606261	0.416101621278788	2.56672784109879	0.0102663154891691	0.0977487315944404
ENSG00000204624	9.5196624303338	4.43298642436219	1.72766708891111	2.56587999668162	0.0102914426172177	0.097933777781654
ENSG00000169223	3137.99945703439	0.437478159115988	0.17051184706273	2.56567603161934	0.0102974955866322	0.0979372092692134
ENSG00000122042	1835.99284137011	0.63185102969454	0.246294897613014	2.56542476445177	0.0103049566729698	0.0979540218554943
ENSG00000106397	934.830612439748	0.705722786751614	0.275165960391875	2.56471689211328	0.010326001995995	0.0980998698736024
ENSG00000130713	429.458046399557	-0.547589030767585	0.213547407510756	-2.56425042640709	0.0103398911046528	0.0981776084191782
ENSG00000172794	33.3750154865096	1.8554829328704	0.723929430718974	2.56307155661239	0.0103750663151653	0.0984572619704467
ENSG00000125149	512.36690735242	-0.550211514165568	0.214715131029029	-2.56251858696992	0.0103916025253368	0.0985055214591848
ENSG00000256229	223.480494273394	-1.21738091883437	0.475036570594268	-2.56270989265402	0.010385878997478	0.0985055214591848
ENSG00000078808	3674.46616151494	0.398988835795045	0.155722496666924	2.56217851842207	0.0104017837044417	0.0985477360324449
ENSG00000177685	184.689426307443	1.35820061484221	0.530201176858794	2.5616703133119	0.0104170152017808	0.0986377251219802
ENSG00000079950	1634.67347487315	0.58498806556212	0.228457716036882	2.56059666405699	0.0104492589826822	0.0988886142998056
ENSG00000117597	606.620153572292	-0.522155752539317	0.203948371392034	-2.56023497013182	0.0104601413352098	0.0989371806884471
ENSG00000198816	337.707533197781	0.866165224896284	0.338550181614598	2.55845446830189	0.010513858748301	0.0993906262442409
ENSG00000188158	140.390457412598	0.828140258489177	0.323743197042074	2.55801593996599	0.0105271266729476	0.0994068136158416
ENSG00000267092	10.6760433331815	2.72545643722411	1.06543049865689	2.55807998800475	0.0105251879347213	0.0994068136158416
ENSG00000213699	1724.05800158385	0.520535986633888	0.203526212519293	2.55758695742714	0.0105401201930625	0.0994749138352391
ENSG00000186106	407.765700207796	0.487535616882973	0.190648984351882	2.55724214078752	0.010550574738806	0.0995189903405466
ENSG00000106066	57.2233473871726	2.29312501013458	0.896896546611951	2.55673301318521	0.010566027916374	0.0996101426308027
ENSG00000196976	163.356101133451	-0.772385859581208	0.302157790961294	-2.55623347365599	0.0105812096375578	0.0996986373571645
ENSG00000173166	133.408364273317	-0.950296065589195	0.37192588776739	-2.55506835325088	0.010616694737101	0.0999782336901054
ENSG00000124155	1385.61503099532	0.582356877080025	0.227990837430854	2.55429947818252	0.0106401696502487	0.100101908880805
ENSG00000064547	350.70681807454	0.630898003461294	0.246998627513339	2.55425712204503	0.0106414641873288	0.100101908880805
ENSG00000130707	6358.15765722232	-0.856702131625167	0.335461567032028	-2.55380113795085	0.0106554093714516	0.100178315975861
ENSG00000112297	8450.29044667094	0.614265394140231	0.240672473377172	2.55228770253913	0.0107018107292119	0.100559614197755
ENSG00000180198	1036.31487854506	0.414232861582303	0.162324364170096	2.55188346925072	0.0107142347334115	0.100621402067873
ENSG00000188659	39.7641683285361	-2.06169220558706	0.808242330253079	-2.55083423425929	0.0107465425597662	0.100869757087167
ENSG00000063241	479.503000220156	0.4820051272508	0.188974350408351	2.55063783105614	0.0107525997813303	0.100871580827583
ENSG00000212864	158.131267377053	0.99489872218943	0.390276148851198	2.549217330134	0.0107964995314166	0.101228214952601
ENSG00000125454	46.4834750799764	-0.928458565316483	0.364241377900839	-2.54902002256659	0.0108026097919353	0.10123033849142
ENSG00000140379	57.4543737624682	2.1470384120394	0.84247694352675	2.5484832891112	0.0108192470197588	0.101331053334214
ENSG00000156171	969.886875127147	0.572732431447595	0.224801314419438	2.54772723605602	0.0108427211768102	0.101452846529033
ENSG00000140848	665.40830595696	0.888138063935763	0.348605962911552	2.54768465954525	0.0108440444502698	0.101452846529033
ENSG00000175065	29.0366173817119	-2.67508348881961	1.05018758361835	-2.54724349301748	0.0108577643113934	0.101525997270393
ENSG00000142224	22.5047506930042	3.34057295120995	1.31182153066888	2.54651480640558	0.0108804595651961	0.101627745287296
ENSG00000107731	1495.47698388859	-0.78264432008756	0.307331712467484	-2.54657846339357	0.0108784752618902	0.101627745287296
ENSG00000272079	28.1992061706593	2.06350161919683	0.810525930826905	2.54587983026235	0.0109002705342319	0.101757544515171
ENSG00000101311	3157.32670481404	0.770104224590367	0.302606583290125	2.54490241493532	0.0109308281073689	0.101987471576617
ENSG00000060656	1921.50779572705	0.725378084204719	0.285103385038984	2.544263317342	0.010950849772226	0.102071214145692
ENSG00000134255	745.438309898787	0.410653233334356	0.161405247077032	2.54423719656628	0.010951668777271	0.102071214145692
ENSG00000196542	71.5222369179778	-1.59271017661089	0.626102944658846	-2.54384712641583	0.0109639057267228	0.10212993937643
ENSG00000152495	17.0422364931003	2.4749237075916	0.97314257386617	2.54322827307724	0.0109833447981426	0.102255653274915
ENSG00000164683	19.7651714964091	2.02081225018138	0.794704859790994	2.54284622181983	0.0109953608599763	0.102312159867978
ENSG00000120158	381.831462398019	-0.52228882308302	0.205493951679996	-2.54162625621385	0.0110338087717443	0.102614421577222
ENSG00000108602	679.046656219248	2.18710804287325	0.86063231782845	2.54128040228813	0.0110447302645862	0.102660499298869
ENSG00000102409	321.239460886812	-0.896078847246935	0.352750636845915	-2.5402614585168	0.011076962668344	0.102904504702408
ENSG00000122435	245.516870515938	-0.527324298301256	0.207642983821265	-2.539571954693	0.0110988212273218	0.103051926182446
ENSG00000165140	40.1228945417808	1.41978929687944	0.559171498962406	2.5390945345283	0.0111139787807995	0.103137003734442
ENSG00000196116	634.916751159404	-0.544437275180757	0.214535133602531	-2.53775344876348	0.0111566551653286	0.103421472047133
ENSG00000072071	1356.47639526646	-0.669446537804248	0.26378268498232	-2.53787142188319	0.0111528951633953	0.103421472047133
ENSG00000155158	561.38977310332	-0.788954717189043	0.310940230525805	-2.53731952232397	0.0111704948201301	0.103438301065844
ENSG00000102763	790.077693868539	0.584467095323	0.23033144218501	2.53750460544391	0.011164589913218	0.103438301065844
ENSG00000253910	38.2884530809274	1.55313598461699	0.612330009970616	2.53643616894021	0.0111987156273602	0.103643842048807
ENSG00000134240	6.20145497270578	-4.06174153959772	1.60175608578044	-2.53580528000222	0.0112189096047398	0.103774913843843
ENSG00000111371	5038.29274437562	-0.735870490092562	0.290272627341172	-2.53510121444436	0.0112414840527771	0.103816281872265
ENSG00000203880	370.357241805932	-0.602429389882881	0.23761951560024	-2.53526899236837	0.0112361009328215	0.103816281872265
ENSG00000131941	346.270151944048	-0.929786149198241	0.366750868575953	-2.53519822000281	0.0112383713703053	0.103816281872265
ENSG00000128602	415.806250359507	0.799766131079712	0.31551903093067	2.53476352510555	0.0112523256894626	0.103860656377255
ENSG00000116151	209.592934846799	-0.73985629799775	0.291944833427705	-2.53423322930961	0.0112693697647912	0.103962202039267
ENSG00000170265	1384.00059175879	-0.465700531592484	0.183824847839104	-2.53339272175052	0.0112964312269649	0.104156001747016
ENSG00000215790	311.104987697251	-1.10188493283198	0.435168271768435	-2.53208931881486	0.0113385104565086	0.104487987361666
ENSG00000182154	725.435867471157	0.476129451135966	0.188227355545666	2.52954438931408	0.0114210726078317	0.105132301313731
ENSG00000179583	78.9544729625533	1.07877588564921	0.426446384003522	2.52968702776079	0.0114164310784531	0.105132301313731
ENSG00000105717	15.3011509251828	1.94857715801654	0.77038052985093	2.52936968486677	0.0114267598637998	0.105132301313731
ENSG00000253374	7.90299859641199	2.72553946310005	1.07765723752106	2.52913391030493	0.0114344391564041	0.105146726716158
ENSG00000145901	4756.54059129701	0.649225530175147	0.256972574133053	2.52643898815053	0.011522540052973	0.105843727502082
ENSG00000131981	6926.28933296928	0.86348977783154	0.341773631115652	2.52649619285388	0.0115206637083651	0.105843727502082
ENSG00000247077	1047.96968084794	-0.469409193421689	0.185819581933939	-2.52615568572622	0.0115318365206862	0.105872597299043
ENSG00000174343	15.8487374498522	-2.50871850425258	0.993530479189854	-2.52505439621565	0.0115680382019757	0.106091736281978
ENSG00000166347	838.913027661568	-0.649104013054978	0.257060693365902	-2.52510021876833	0.0115665299108126	0.106091736281978
ENSG00000181788	1252.65205232331	0.59565970928535	0.235944270913192	2.52457797334907	0.0115837304392624	0.106179052854294
ENSG00000259570	7.4631426595121	-2.81223616056796	1.11407886153912	-2.52427028072573	0.0115938751391492	0.106215453551151
ENSG00000163734	102.538509575048	1.53332732265805	0.607863505983247	2.52248622851248	0.0116528512836392	0.106698938975525
ENSG00000118322	2156.92807036775	0.803303143426206	0.318582211639083	2.52149402596356	0.0116857659727318	0.106943406149389
ENSG00000169429	3349.94420749418	2.39729114121126	0.951010363264346	2.52078340448631	0.0117093903344688	0.107102637269823
ENSG00000165511	9.87835114531724	2.66246914943429	1.0567053622615	2.51959462355356	0.0117490056684091	0.107407886570127
ENSG00000100413	816.488258068912	-0.474580293979843	0.188407023128091	-2.51890978425573	0.0117718814122311	0.107559861761782
ENSG00000067141	497.420970052611	0.628937602189614	0.249725244496184	2.5185183158334	0.0117849754016579	0.107622347019917
ENSG00000084676	790.141986543215	0.807435729937553	0.320768334190535	2.51719276460107	0.0118294089356246	0.107970812062292
ENSG00000271122	198.396335611635	-0.590465997771425	0.234652310168759	-2.51634427697204	0.0118579288450155	0.108132618320998
ENSG00000255325	9.2492334548014	2.59355491397005	1.03078177822364	2.51610473599908	0.0118659914786425	0.108132618320998
ENSG00000155465	19.611446635173	1.98704455402404	0.789707923038363	2.5161765458538	0.0118635739434516	0.108132618320998
ENSG00000268089	98.7256881548479	2.09536995481147	0.832848259212358	2.51590842825692	0.0118726025626549	0.108135588719151
ENSG00000143556	4102.6531544616	-3.21188157451268	1.27673665447078	-2.51569621915807	0.0118797528324906	0.10814346427672
ENSG00000174125	86.4687488344877	1.54054308523933	0.612449890055861	2.51537817256986	0.0118904763888844	0.108183842554604
ENSG00000115840	348.34252768745	-0.516760174879494	0.205505899002491	-2.51457587051178	0.0119175657006073	0.108344576931265
ENSG00000171566	1551.43040612266	-0.446011233463844	0.177376980805341	-2.51448204518325	0.0119207372351574	0.108344576931265
ENSG00000130303	2658.51941037653	-2.9163649919648	1.1602025609919	-2.51366881096305	0.0119482579868398	0.108537369938531
ENSG00000171812	33.2047270215558	1.72329367855091	0.685687095369554	2.51323627087095	0.0119629185611594	0.108613199918072
ENSG00000160999	46.0578371238788	1.21116140946041	0.482022906969594	2.51266359326115	0.0119823535105879	0.108732274340541
ENSG00000002933	28.0398112084713	2.26809413594065	0.903129044576933	2.5113732633891	0.0120262460299181	0.109073043197017
ENSG00000176422	178.15611085491	-0.696150133049065	0.277239112776607	-2.51100981415276	0.0120386350033685	0.109127879469418
ENSG00000163207	21075.187198066	-1.00799153541117	0.401507180029239	-2.51051932704607	0.0120553722793824	0.109222053747643
ENSG00000167748	11.3942374582846	-2.42021260442716	0.964197901332066	-2.51007868932672	0.0120704260902776	0.109300884675382
ENSG00000213614	282.945549153252	0.638332742942845	0.254345067450798	2.50971150862333	0.0120829830626631	0.109357035030573
ENSG00000277619	34.9946405625855	2.04388508185669	0.81463684089577	2.50895243039739	0.012108978996749	0.109534691713495
ENSG00000177182	8.42176598554826	3.96187749411416	1.57968982878295	2.50800975098164	0.0121413316623029	0.109769632816564
ENSG00000010818	2081.46363522363	-0.669661457121318	0.267232992325395	-2.50590861290775	0.012213718310585	0.110366083788664
ENSG00000173083	210.086021257155	-1.43854024668358	0.574294190063098	-2.50488385843766	0.0122491608242616	0.110529002611585
ENSG00000229563	8.56894986180312	3.50958799770812	1.40123186563175	2.50464472282453	0.0122574447534382	0.110529002611585
ENSG00000136451	1087.67226447903	0.742791715585192	0.296552173336021	2.50475896780409	0.0122534865586115	0.110529002611585
ENSG00000105419	114.195371722285	1.62790786646299	0.649952083051557	2.50465828006871	0.012256974982418	0.110529002611585
ENSG00000145982	265.635827180397	-0.596825667736742	0.2383308957439	-2.5041892528196	0.0122732364825992	0.110613427806767
ENSG00000147894	219.172886450555	-0.591212460786353	0.236287002635847	-2.50209471613425	0.0123460890203991	0.111211759997888
ENSG00000267922	12.0214466613164	-2.95232252483142	1.18079254968473	-2.50028891664305	0.0124092058731807	0.111721814258542
ENSG00000162433	2417.62021167868	-0.667286689801465	0.266999942264928	-2.49920162581667	0.0124473468837558	0.112006591597813
ENSG00000182612	169.148876765075	-0.934316382542451	0.374057273552374	-2.4977896397238	0.0124970327960526	0.112394902904383
ENSG00000155760	178.311988751971	0.780069535944095	0.312412625916097	2.49692064671417	0.0125276987343682	0.112553032232274
ENSG00000229028	5.28364646703069	-4.06033006104088	1.62602419679977	-2.4970907991604	0.0125216889754085	0.112553032232274
ENSG00000132854	545.091209943964	1.30601433889489	0.523393180762322	2.49528344445123	0.0125856551137149	0.112955762249068
ENSG00000175567	54.327477564183	1.50360461487904	0.602547652422799	2.49541195427974	0.0125810973414379	0.112955762249068
ENSG00000164292	465.711829987059	1.48443796786161	0.595032300140168	2.49471829934599	0.0126057160922771	0.113076822402309
ENSG00000119673	133.045742885878	1.34644988804744	0.539774948064186	2.49446531906726	0.0126147053119927	0.113098491345928
ENSG00000108946	7856.0990183668	0.551649561998862	0.221187225343771	2.49403898051292	0.0126298673613456	0.113175452058308
ENSG00000019186	336.101337154177	3.29087701883334	1.32017637562844	2.4927555738655	0.0126756070910553	0.113526194691102
ENSG00000171658	223.300845785665	-1.32684215376462	0.532346273401429	-2.49244189366962	0.0126868087112422	0.113567400560314
ENSG00000196368	80.2661513539862	1.43855524248872	0.577436722381712	2.49127772226749	0.0127284582860716	0.113880980141374
ENSG00000231312	123.178608011758	0.908938005674625	0.364986347386419	2.49033426094788	0.0127623004325763	0.114065131918169
ENSG00000179604	1594.07966858847	0.707739939574271	0.284181196105752	2.49045309567527	0.0127580334283432	0.114065131918169
ENSG00000174808	81.7619433247922	1.01270581343026	0.406894800778409	2.48886398030378	0.0128151984468476	0.114359693608928
ENSG00000168143	1881.59858289586	-0.666933025772096	0.267955409370466	-2.48897018850632	0.0128113707783677	0.114359693608928
ENSG00000177045	146.731797397986	0.847995491435395	0.340669966158275	2.48919944718994	0.0128031119062368	0.114359693608928
ENSG00000271392	9.28358782315783	2.74245482088419	1.10232690666974	2.48787796459533	0.0128507820908937	0.114617784278811
ENSG00000180773	211.891020531628	0.758091615759001	0.304846250611173	2.48679986793059	0.0128897888083694	0.114906122511914
ENSG00000160868	8.72002025442919	2.76849836819189	1.11413552076432	2.48488475288235	0.0129593381477602	0.115350431967703
ENSG00000087448	486.990135248116	-0.643797916695488	0.259070535206841	-2.48502947732548	0.012954070761561	0.115350431967703
ENSG00000269825	73.7001297428886	-1.19136202545203	0.479445721290174	-2.48487362082639	0.0129597433881761	0.115350431967703
ENSG00000264964	7.09572992277525	4.01749075378681	1.61710694668316	2.48436923855101	0.0129781161887487	0.115454234243755
ENSG00000049239	1366.20299075364	0.663142394271568	0.267099427938567	2.48275482800394	0.0130370782498401	0.115918827539276
ENSG00000197217	1549.41917951905	0.693633783972383	0.279408034111987	2.4825119513005	0.0130459691500707	0.115937964476739
ENSG00000182134	238.314481349918	-0.548264252449397	0.220962377187281	-2.48125612798194	0.0130920262283982	0.116287202508823
ENSG00000106003	124.919156647278	-0.860105837676661	0.346674352286171	-2.48101952741709	0.0131007195885929	0.116304375914211
ENSG00000068654	1757.45092448475	-0.528222558354016	0.212990992062573	-2.48002299646002	0.0131373909534021	0.116509696573857
ENSG00000106565	31.0645272663826	2.2882921975646	0.922653283013702	2.48012144940324	0.013133763944792	0.116509696573857
ENSG00000231584	65.630276103389	1.12110126291037	0.452158829609543	2.47944127040156	0.0131588398379193	0.116639793617415
ENSG00000197888	6.17164529784976	5.35438106057479	2.15967775695906	2.47924999149597	0.0131658992648574	0.116642274383044
ENSG00000102225	2640.09802473578	0.382728074157223	0.154401383697667	2.47878655612725	0.0131830169102526	0.116673768488115
ENSG00000166535	32240.8276368234	0.86645290313133	0.349546033127752	2.47879483963321	0.0131827107745219	0.116673768488115
ENSG00000283689	9.70717222387882	-3.99653866679163	1.6127990286573	-2.4780140586511	0.0132115939467328	0.116866567533952
ENSG00000185989	9.67862954941776	3.02745518637652	1.22217931509323	2.47709574936276	0.0132456362486733	0.117015948249387
ENSG00000150394	12.4911449392997	1.96008634045189	0.791312004642922	2.4770082204634	0.0132488850444525	0.117015948249387
ENSG00000124201	3805.04320635807	-0.536524309336353	0.216596333645453	-2.47707013459698	0.0132465869148234	0.117015948249387
ENSG00000225526	133.68512503093	0.807941414653294	0.326320376876444	2.47591468968917	0.0132895328648769	0.117314732139665
ENSG00000185303	31.0909255946066	1.79827219238863	0.726453726367121	2.47541189083234	0.0133082594567889	0.117419796899515
ENSG00000118855	2380.76087165	-0.552785979720966	0.223344636371136	-2.47503584013717	0.0133222805947784	0.117483258653594
ENSG00000204588	47.9810939495016	-1.26019365737344	0.509256040020316	-2.47457773367433	0.013339378842479	0.11749510539267
ENSG00000156127	11.8011079592875	3.00263236400857	1.21345394548377	2.47445102896881	0.0133441113593302	0.11749510539267
ENSG00000130255	5580.75107735519	-0.533427304772678	0.215562722203466	-2.47458048089217	0.0133392762482431	0.11749510539267
ENSG00000173698	14.6428194332505	3.00405769344998	1.2147710531946	2.47294145308281	0.0134006094366115	0.117932217573862
ENSG00000116120	1088.39792825055	-0.624323864483356	0.252520575780631	-2.47236829138912	0.0134221161583142	0.117973069200804
ENSG00000114771	11.317307771655	-1.81857034278673	0.735542709719593	-2.47241977760886	0.013420182996881	0.117973069200804
ENSG00000185650	11823.5659861117	0.374022666950534	0.151287167747308	2.47226960832036	0.0134258221153836	0.117973069200804
ENSG00000146232	234.720216776493	0.620595220214235	0.251066444035071	2.47183657935405	0.0134420948349665	0.117995531446734
ENSG00000226329	16.6205481784373	-1.57620589784546	0.63763060895746	-2.47197338976965	0.0134369517778897	0.117995531446734
ENSG00000254535	10.2185682184236	2.10840914698665	0.853174395448783	2.47125225303743	0.0134640807584636	0.118128255711049
ENSG00000164976	880.124018491037	0.654611990712234	0.264979947802834	2.47042086067326	0.0134954175855927	0.118342843812499
ENSG00000179111	14.3547376522067	2.10971750495883	0.854124186114873	2.470036019651	0.0135099448142274	0.118409883101774
ENSG00000165259	62.2075627724387	-0.989606642924041	0.400852577180696	-2.46875459772321	0.0135584164124276	0.11877421302231
ENSG00000266208	136.891057921598	-0.796309309922541	0.322754288275449	-2.4672307660958	0.013616257446184	0.119220208326511
ENSG00000079335	74.4351322261692	-1.01480129914428	0.411512847021738	-2.46602580329812	0.0136621491969783	0.119519694110499
ENSG00000126003	1188.06444001775	-0.461872430649759	0.18729863407395	-2.46596796038246	0.013664355612633	0.119519694110499
ENSG00000041515	6.66521543151045	2.70092433368699	1.09543482439569	2.46561846815211	0.0136776936768141	0.119575568958124
ENSG00000118971	2967.88117542219	0.821422165502269	0.333285435196463	2.4646206487183	0.0137158378865964	0.11984814161447
ENSG00000233850	15.9945849333879	2.23672544904717	0.907837343393731	2.46379537625728	0.0137474570007022	0.120063450607656
ENSG00000197702	923.477570010212	0.647146422632876	0.262687280404016	2.46356207897679	0.0137564071100035	0.120080661759315
ENSG00000185033	14167.5073724853	0.606992665943043	0.246411889986261	2.46332539382286	0.013765492448241	0.120099035279912
ENSG00000142676	16856.7804260951	-0.340005549079219	0.138119142271741	-2.46168303311846	0.013828681790735	0.120589189158437
ENSG00000155438	698.938278017674	-0.513281988584951	0.208573064738389	-2.4609217361252	0.0138580592475155	0.120784148608665
ENSG00000126705	1975.70024862448	0.496114277665569	0.201634805895709	2.46045951968319	0.0138759224483922	0.120878605430171
ENSG00000227925	9.05351500009125	4.20276360821256	1.70864839562186	2.45970067275484	0.0139052935663849	0.120962285059174
ENSG00000253485	14.4398549254775	2.29924610473719	0.934754329596335	2.45973303566307	0.0139040398426569	0.120962285059174
ENSG00000226608	6.43942644601635	2.68462386638566	1.09145851317624	2.45966643163851	0.0139066201596656	0.120962285059174
ENSG00000272168	126.137935107693	1.59193592344501	0.64753931403582	2.45843903055583	0.0139542468377904	0.121315218213332
ENSG00000104687	3588.68435670945	0.760875614891722	0.309671200864297	2.4570435118542	0.0140085718327055	0.121725999182676
ENSG00000165507	374.077931820608	1.52782971516122	0.621904834905282	2.45669374060086	0.0140222170124731	0.121783060928622
ENSG00000088538	170.117241626196	0.917831461176845	0.373720685061934	2.45592898082358	0.0140520924838229	0.121868107331865
ENSG00000164877	1120.27740945356	1.08274558125597	0.440875426071557	2.45589914344701	0.0140532592238547	0.121868107331865
ENSG00000169550	878.048746974973	-1.11476671665032	0.453881738686676	-2.45607307285801	0.0140464592123436	0.121868107331865
ENSG00000155858	228.51545035006	-0.577301268856456	0.235098158109744	-2.45557546472556	0.0140659216272373	0.121916464280412
ENSG00000119669	988.134818324365	-0.673790634734022	0.274417692857834	-2.45534691191755	0.0140748687421616	0.121932586459663
ENSG00000144161	371.145612702426	-0.496097702822554	0.20212805392154	-2.45437332026717	0.0141130380493797	0.122140251327756
ENSG00000185513	146.760342294554	1.25411997912818	0.510936071795736	2.45455360926163	0.0141059630009237	0.122140251327756
ENSG00000165905	933.982483690413	1.05080324511087	0.4283964851021	2.4528755058773	0.0141719376899068	0.122588329791275
ENSG00000137200	1412.7609013971	-0.611493210569609	0.249405230773943	-2.45180587701409	0.0142141321301003	0.122891529295667
ENSG00000196782	551.14008131197	-0.706894688809567	0.288352965416435	-2.45149096278126	0.0142265758865319	0.122910209520712
ENSG00000176933	6.62781947560879	2.62825168404506	1.07214765417653	2.45138966988993	0.0142305804920231	0.122910209520712
ENSG00000164077	260.913825190011	-0.56989021180676	0.23250549457585	-2.45108277052285	0.0142427198034262	0.122953333777194
ENSG00000139209	27.1671051893096	1.60951993247737	0.656781950928469	2.45061535293723	0.0142612259176672	0.123051350006752
ENSG00000179046	15.3662420188636	-3.09121281290718	1.26172708047312	-2.44998531041121	0.0142862042861877	0.123205085084641
ENSG00000229035	45.0662618555871	4.23842829528544	1.73025248779467	2.44960104099466	0.0143014577908175	0.123265373113446
ENSG00000241990	44.9402468834886	-1.14855578733641	0.468938383412026	-2.4492680231877	0.0143146884905937	0.123265373113446
ENSG00000274276	35.3364759404295	-1.49291133654887	0.609501705375794	-2.44939648795306	0.0143095833445004	0.123265373113446
ENSG00000163378	906.439899377905	0.535620631162489	0.218730115117983	2.44877405598024	0.014334333548592	0.123372790747136
[truncated: 56,885 more rows]
